# Supplementary material
Source: publisher figshare collection journal article supplement (https://sage.figshare.com/ndownloader/files/17823044)
Supplement: Supplementary file 1 [file 17823044]

## Sheet: EODvsAL_all.GOenrich.sign
Category	ID	Description	GeneRatio	BgRatio	pvalue	padj	geneID	Count
BP	GO:0006631	fatty acid metabolic process	164/4218	362/20432	1.90713e-26	1.06666e-22	Pparg/Akt1/Apoc2/Cyp2c29/Lipe/Crot/Insig2/Gstm7/Cyp2a5/Ggt5/Elovl1/Cav1/Mid1ip1/Fads1/Plin5/Acsf3/Ptgds/Cyp2j9/Lpl/Lta4h/Acadvl/Acsl1/Pdk4/Pex7/Avpr1a/Pex13/Acsl6/Acaca/Srebf1/Acly/Stat5b/Acot2/Acot3/Elovl2/Eci2/Ndufs6/Acot12/Oxsm/Hacl1/Ephx2/Ppara/Slc25a17/Ehhadh/Rgn/Acat2/Eci1/Cyp4f14/Fads3/Lipa/Cpt1a/Acsl5/Cyp2c55/Cyp2c39/Gk/Fasn/Cyp2c44/Echs1/Cyp2e1/Hadha/Lypla1/Acadl/Pecr/Pam/Dbi/Slc45a3/Adi…	164
BP	GO:0008610	lipid biosynthetic process	184/4218	497/20432	1.33018e-17	3.71986e-14	Cyp51/Akt1/Apoc2/Cyp17a1/Insig2/Lpcat3/Fgfr4/Smpd4/Ggt5/Elovl1/Mvd/Cdk4/Mid1ip1/Kdsr/Pigyl/Fads1/Plin5/Dhdds/Mogat1/Acsf3/Ptgds/Lpl/Cers2/Lta4h/Hsd11b1/Cyb5r3/Ctdnep1/Acadvl/Acsl1/Pdk4/Pex7/Igf1/Avpr1a/Acsl6/Acaca/Srebf1/Acly/Sptlc2/0610007P14Rik/Fdft1/Gpld1/Elovl2/Srd5a1/Lpcat1/Hexb/Hmgcr/Plpp1/Oxsm/Fitm1/Chkb/Snai2/St3gal6/Pigp/Rgn/Pigx/Cyp39a1/Pigf/Cyp21a1/Stard4/Fads3/Prpf19/Chka/Pcx/Sf1/Acsl…	184
BP	GO:0044282	small molecule catabolic process	108/4218	246/20432	1.15748e-16	2.15793e-13	Ftcd/Akt1/Pon1/Lipe/Prodh/Crot/Plin5/Dhdh/Pten/Acsf3/Acot8/Afmid/Acadvl/Pex7/Pah/Pex13/Galk1/Acot2/Eci2/Glud1/Hacl1/Slc25a17/Ehhadh/Csad/Synj2/Acat2/Cyp39a1/Eci1/Impa2/Gldc/Cpt1a/Bad/Acsl5/Got1/Echs1/Hadha/Acadl/Pnkd/Agxt/Dbi/Phyh/Slc27a2/Lpin3/Impa1/Ahcy/Acad9/Etfdh/Hadh/Tdo2/Bdh2/Decr1/Cyp7a1/Aldob/Gale/Park7/Mtor/Acox3/Ppat/Hpd/Acad10/Acads/Aass/Pon3/Akr1b8/Fah/Qprt/Abcd1/Renbp/Ido2/Got2/Acad8…	108
BP	GO:0016054	organic acid catabolic process	85/4218	177/20432	3.20833e-16	4.48604e-13	Ftcd/Akt1/Pon1/Lipe/Prodh/Crot/Plin5/Acsf3/Acot8/Afmid/Acadvl/Pex7/Pah/Pex13/Acot2/Eci2/Glud1/Hacl1/Slc25a17/Ehhadh/Csad/Acat2/Cyp39a1/Eci1/Gldc/Cpt1a/Acsl5/Got1/Echs1/Hadha/Acadl/Agxt/Dbi/Phyh/Slc27a2/Lpin3/Ahcy/Acad9/Etfdh/Hadh/Tdo2/Bdh2/Decr1/Mtor/Acox3/Ppat/Hpd/Acad10/Acads/Aass/Pon3/Fah/Qprt/Abcd1/Renbp/Ido2/Got2/Acad8/Acat1/Bckdhb/Etfa/Amt/Cdo1/Faah/Gcsh/Uroc1/Acaa1a/Amdhd2/Aspg/Fam206a/Kmo…	85
BP	GO:0051186	cofactor metabolic process	134/4218	337/20432	5.51004e-16	6.10795e-13	Hk2/Haao/Blvra/Idh3g/Gnmt/Ier3/Crot/Hmox2/Cyp2a5/Cs/Shpk/Mvd/Fpgs/Mocs2/Qdpr/Hsd11b1/Acot8/Aldoc/Pank3/Fdxr/Mdh2/Pdk4/Vnn3/Pah/Igf1/Pcbd1/Gamt/Acaca/Galk1/Acly/Mthfd1/Acot2/Acot3/Acot12/Hmgcr/Dhfr/Oxsm/Btd/Tkt/Sucla2/Nadk2/Ppara/Cpox/Ehhadh/Fech/Fasn/Shmt2/Nnt/Taldo1/Tyms/Iscu/Coq8a/Mpc2/Mmadhc/Pdss1/Gpd2/Idh3b/Ahcy/Acss2/Pmvk/Tdo2/Bdh2/Aldob/Alad/Vcp/Ppcs/Gale/Hmgcl/Pgd/H6pd/Mthfr/Nadk/Tpk1/Akr1…	134
BP	GO:0044283	small molecule biosynthetic process	158/4218	421/20432	6.65713e-16	6.10795e-13	Kat2b/Cyp51/Gnmt/Apoc2/Insig2/Mri1/G6pc2/Fgfr4/Ggt5/Elovl1/Mvd/Mid1ip1/Fads1/Apip/Dhdds/Cad/Acsf3/Ptgds/Lpl/Lta4h/Plcg1/Cyb5r3/Acadvl/Slc35b4/Pdk4/Cry1/Pah/Avpr1a/Acaca/Srebf1/Adi1/Acly/Sptlc2/Mthfd1/0610007P14Rik/Fdft1/Elovl2/Hmgcr/Dhfr/Nln/Oxsm/Glud1/Pnp/Ppara/Pycrl/Snai2/Rgn/Cyp39a1/Stard4/Fads3/Pcx/Rbp4/Gsto1/Fasn/Got1/Padi4/Shmt2/Aasdhppt/Acadl/Asnsd1/Pecr/Agxt/Slc45a3/Glul/Coq8a/Hsd17b7/Pds…	158
BP	GO:0046395	carboxylic acid catabolic process	79/4218	161/20432	7.64449e-16	6.10795e-13	Ftcd/Akt1/Pon1/Lipe/Prodh/Crot/Plin5/Acsf3/Acot8/Acadvl/Pex7/Pah/Pex13/Acot2/Eci2/Glud1/Hacl1/Slc25a17/Ehhadh/Csad/Acat2/Cyp39a1/Eci1/Gldc/Cpt1a/Acsl5/Got1/Echs1/Hadha/Acadl/Agxt/Dbi/Phyh/Slc27a2/Lpin3/Acad9/Etfdh/Hadh/Bdh2/Decr1/Mtor/Acox3/Ppat/Hpd/Acad10/Acads/Aass/Pon3/Fah/Qprt/Abcd1/Renbp/Got2/Acad8/Acat1/Bckdhb/Etfa/Amt/Cdo1/Faah/Gcsh/Uroc1/Acaa1a/Amdhd2/Aspg/Fam206a/Etfbkmt/Acacb/Npl/Acot4/…	79
BP	GO:0006732	coenzyme metabolic process	114/4218	275/20432	2.61304e-15	1.82684e-12	Hk2/Haao/Idh3g/Gnmt/Ier3/Crot/Cs/Shpk/Mvd/Fpgs/Mocs2/Qdpr/Hsd11b1/Acot8/Aldoc/Pank3/Fdxr/Mdh2/Pdk4/Vnn3/Pah/Igf1/Pcbd1/Gamt/Acaca/Galk1/Acly/Mthfd1/Acot2/Acot3/Acot12/Hmgcr/Dhfr/Oxsm/Tkt/Sucla2/Nadk2/Ppara/Ehhadh/Fasn/Shmt2/Nnt/Taldo1/Tyms/Coq8a/Mpc2/Mmadhc/Pdss1/Gpd2/Idh3b/Ahcy/Acss2/Pmvk/Tdo2/Aldob/Vcp/Ppcs/Gale/Hmgcl/Pgd/H6pd/Mthfr/Nadk/Tpk1/Aldh1l1/Ldhb/Idh2/Coq7/Qprt/Dgat2/Nadsyn1/Nudt7/Me1/…	114
BP	GO:0016053	organic acid biosynthetic process	98/4218	241/20432	9.34224e-13	5.80569e-10	Apoc2/Insig2/Mri1/Fgfr4/Ggt5/Elovl1/Mid1ip1/Fads1/Apip/Cad/Acsf3/Ptgds/Lpl/Lta4h/Acadvl/Pdk4/Pah/Avpr1a/Acaca/Srebf1/Adi1/Acly/Mthfd1/Elovl2/Dhfr/Oxsm/Glud1/Pycrl/Rgn/Cyp39a1/Stard4/Fads3/Gsto1/Fasn/Got1/Padi4/Shmt2/Aasdhppt/Acadl/Asnsd1/Pecr/Agxt/Slc45a3/Glul/Ptges2/Slc27a2/Ahcy/Acss2/Cth/Cyp7a1/Park7/Mthfr/Fam213b/Htt/Ldhb/Slc27a5/Acsm3/Plp1/Msmo1/Got2/Tecr/Agt/Sc5d/Apoa5/Lipc/Acsl3/Cdo1/Acsm1/…	98
BP	GO:0006790	sulfur compound metabolic process	104/4218	262/20432	1.14588e-12	6.40889e-10	Comt/Txnrd3/Eef1e1/Gnmt/Gstm7/Cs/Ggt5/Mvd/Nfe2l2/Acot8/Pdk4/Dcn/Igf1/Gamt/Acaca/Arsg/Acly/Stat5b/Mthfd1/Acot2/Acot3/Acot12/Oxsm/Sucla2/Angpt1/Oplah/Ehhadh/Csad/Gsto1/Fasn/Abcc2/Iscu/Idh1/Mpc2/Ahcy/Acss2/Gstm4/Pmvk/Tdo2/Papss1/Gclm/Cth/Txn1/Slc35d1/Hmgcl/Extl1/Mthfr/Sult1d1/Tpst2/Tpk1/Nat8/Nox4/Sult1a1/Dgat2/Hmgn5/Eif2ak3/Nudt7/Ciapin1/Lipc/Gclc/Fam96a/Acpp/Cdo1/Mamdc2/Gstt2/Gpc1/Acot11/Hpse/Chst7…	104
BP	GO:0072329	monocarboxylic acid catabolic process	51/4218	96/20432	2.04395e-12	1.02281e-09	Akt1/Lipe/Crot/Plin5/Acadvl/Pex7/Pex13/Acot2/Eci2/Hacl1/Slc25a17/Ehhadh/Acat2/Cyp39a1/Eci1/Cpt1a/Acsl5/Echs1/Hadha/Acadl/Agxt/Dbi/Phyh/Slc27a2/Lpin3/Acad9/Etfdh/Hadh/Bdh2/Decr1/Mtor/Acox3/Acad10/Acads/Pon3/Abcd1/Acad8/Acat1/Etfa/Faah/Acaa1a/Etfbkmt/Acacb/Ech1/Fabp1/Ces1d/Hadhb/Acadm/Cyp26b1/Mlycd/Acad11	51
BP	GO:0009062	fatty acid catabolic process	47/4218	85/20432	2.19448e-12	1.02281e-09	Akt1/Lipe/Crot/Plin5/Acadvl/Pex7/Pex13/Acot2/Eci2/Hacl1/Slc25a17/Ehhadh/Acat2/Eci1/Cpt1a/Acsl5/Echs1/Hadha/Acadl/Dbi/Phyh/Slc27a2/Lpin3/Acad9/Etfdh/Hadh/Bdh2/Decr1/Mtor/Acox3/Acad10/Acads/Abcd1/Acad8/Acat1/Etfa/Faah/Acaa1a/Etfbkmt/Acacb/Ech1/Fabp1/Ces1d/Hadhb/Acadm/Mlycd/Acad11	47
BP	GO:0030258	lipid modification	77/4218	177/20432	4.75392e-12	2.04528e-09	Pparg/Ocrl/Akt1/Crot/Plin5/Pten/Acadvl/Pdk4/Pex7/Pex13/Efr3b/Eci2/Plpp1/Hacl1/Mtmr6/Ephx2/Ppara/Slc25a17/Ehhadh/Synj2/Acat2/Eci1/Stard4/Impa2/Cpt1a/Acsl5/Pi4k2a/Echs1/Hadha/Acadl/Dbi/Adipor1/Phyh/Slc27a2/Impa1/Acad9/Etfdh/Hadh/Bdh2/Decr1/Mtor/Acox3/Acad10/Acads/Agk/Adipor2/Pik3c2g/Nucb2/Dgat2/Lamtor1/Abcd1/Acad8/Agt/Acat1/Apoa5/Etfa/Pik3cb/Ip6k2/Lcat/Tmem55b/Acaa1a/Scd1/Pi4kb/Pik3cd/Etfbkmt/Plppr…	77
BP	GO:0046394	carboxylic acid biosynthetic process	91/4218	225/20432	8.58764e-12	3.43076e-09	Apoc2/Insig2/Mri1/Fgfr4/Ggt5/Elovl1/Mid1ip1/Fads1/Apip/Cad/Acsf3/Ptgds/Lpl/Lta4h/Acadvl/Pdk4/Avpr1a/Acaca/Srebf1/Adi1/Acly/Mthfd1/Elovl2/Dhfr/Oxsm/Glud1/Pycrl/Rgn/Cyp39a1/Stard4/Fads3/Gsto1/Fasn/Got1/Shmt2/Aasdhppt/Acadl/Asnsd1/Pecr/Agxt/Slc45a3/Glul/Ptges2/Slc27a2/Acss2/Cth/Cyp7a1/Park7/Mthfr/Fam213b/Htt/Ldhb/Slc27a5/Acsm3/Plp1/Msmo1/Got2/Tecr/Agt/Sc5d/Apoa5/Lipc/Acsl3/Acsm1/Hacd3/Gulo/Pnpla8/De…	91
BP	GO:0019395	fatty acid oxidation	49/4218	96/20432	3.71687e-11	1.3859e-08	Pparg/Akt1/Crot/Plin5/Acadvl/Pdk4/Pex7/Pex13/Eci2/Hacl1/Ppara/Slc25a17/Ehhadh/Acat2/Eci1/Cpt1a/Acsl5/Echs1/Hadha/Acadl/Dbi/Adipor1/Phyh/Slc27a2/Acad9/Etfdh/Hadh/Bdh2/Decr1/Mtor/Acox3/Acad10/Acads/Adipor2/Nucb2/Dgat2/Abcd1/Acad8/Acat1/Etfa/Acaa1a/Etfbkmt/Acacb/Mapk14/Fabp1/Hadhb/Acadm/Mlycd/Acad11	49
BP	GO:0042254	ribosome biogenesis	96/4218	248/20432	4.46924e-11	1.56228e-08	Emg1/Utp20/Wbscr22/Aamp/Rps18/Rpl10/Rps25/Rps5/Pten/Skiv2l2/Exosc10/Nol11/Aatf/Xpo1/Ddx52/Eral1/Mterf3/Drosha/Gnl1/Rps14/Pdcd11/Gnl3l/Rps24/Exosc7/Nop16/Imp4/Mterf4/Tfb2m/Nop10/Nop56/Exosc8/Eif2a/Tex10/Nol6/Rps6/Ebna1bp2/Gnl2/Mrpl20/Ran/Rpl6/Pop4/Mrps11/Rrp8/Lsm6/Mphosph6/Imp3/Rpsa/Noc4l/Utp6/Rps16/Rpl10a/Efl1/Rpl12/Rps21/Isg20/Nup88/Tbl3/Rps19/Rrp9/Utp15/Ipo9/Rpl7/Rps2/Ddx28/Rps8/Rps10/Zfp622/Di…	96
BP	GO:0008202	steroid metabolic process	97/4218	253/20432	6.6679e-11	1.97808e-08	Cyp51/Lmf1/Pon1/Lipe/Cyp17a1/Insig2/Fgfr4/Mvd/Abca1/Hsd11b1/Cyb5r3/Acadvl/Fdxr/Igf1/Srebf1/Stat5b/Npc2/0610007P14Rik/Fdft1/Srd5a1/Hmgcr/Ebpl/Ephx2/Dhrs4/Sqle/Srebf2/Snai2/App/Cyp39a1/Cyp21a1/Stard4/Fech/Lipa/Sf1/Hsd17b6/Cyp2e1/Acadl/Hsd17b7/Abca2/Hsd17b12/Bmp2/Slc27a2/Il1a/Hmgcs2/Pmvk/Cyp7a1/Gba2/Hsd17b11/Slco1b2/Slco1a4/Slc27a5/Sult1a1/Dgat2/Dkk3/Lamtor1/Ebp/Nsdhl/Fgfr1/Msmo1/Tecr/Hsd17b2/Agt/Sc…	97
BP	GO:0009894	regulation of catabolic process	148/4218	438/20432	6.68843e-11	1.97808e-08	Apoh/Akt1/Apoc2/Dlgap1/Ier3/Rad23a/Bax/Dhx34/Snf8/Rnf114/Cdk4/Ubqln4/Derl3/Pttg1ip/Ube2g2/Faf1/Odc1/Plin5/Atraid/Pten/Ppp1cb/Hsd11b1/Derl2/Cdk5rap3/Ubb/Fyn/Psen1/Igf1/Supv3l1/Sumo3/Rhbdf1/Xpo1/Erlec1/Rack1/Igfbp3/Pnpt1/Nbas/Ubxn2a/Rnf144a/Sptlc2/Gpld1/Nkd2/Lpcat1/Psme1/Rnf19a/Ppara/Gsk3b/Rgn/Park2/Lrpprc/Axin1/Anks1/Wac/Rnf138/Bag6/Ndfip1/Smad4/Nedd4l/Cpt1a/Acsl5/Btrc/Arih1/Agap2/Itgb1/Idh1/Pdcl3…	148
BP	GO:0019439	aromatic compound catabolic process	101/4218	267/20432	6.71974e-11	1.97808e-08	Comt/Snd1/Blvra/Pon1/Bax/Hmox2/Pan2/Dhx34/Cnp/Lsm2/Khsrp/Skiv2l2/Exosc10/Ada/Afmid/Smpdl3a/Enpp3/Nudt4/Supv3l1/Hint1/Mgat1/Rack1/Igfbp3/Pnpt1/Nbas/Pnp/Ephx2/Drosha/Pop1/Eif3e/Pycrl/Ncbp2/Rgn/Noct/Xdh/Lrpprc/Mtpap/Etf1/Dcp2/Dnase1l3/Exosc7/Upp2/Hnmt/Dut/Adal/Ahcy/Samhd1/Exosc8/Tdo2/Dnase2b/Vcp/Pde4b/Pnrc2/Cda/Dffa/Nudt9/Hpd/Pon3/Zc3hav1/Aldh1l1/Fah/Ido2/Lsm6/Nudt7/Dcps/Nt5e/Mlh1/Pon2/Dpyd/Nudt15/G…	101
BP	GO:0044242	cellular lipid catabolic process	73/4218	173/20432	9.54772e-11	2.56271e-08	Apoh/Gm2a/Akt1/Apoc2/Lipe/Crot/Smpd4/Plin5/Lpl/Plcg1/Acadvl/Smpdl3a/Pex7/Pex13/Sptlc2/Acot2/Gpld1/Eci2/Hexb/Hacl1/Slc25a17/Ehhadh/Acat2/Eci1/Cpt1a/Acsl5/Hexa/Echs1/Hadha/Idh1/Acadl/Dbi/Phyh/Gpcpd1/Slc27a2/Lpin3/Acad9/Etfdh/Hadh/Bdh2/Decr1/Gba2/Mtor/Acox3/Acad10/Acads/Akr1b8/Fgf21/Gla/Abcd1/Pla2g15/Acad8/Acat1/Apoa5/Lipc/Etfa/Faah/Neu3/Acaa1a/Pnpla8/Abhd2/Etfbkmt/Pnpla3/Acacb/Ech1/Fabp1/Ces1d/Hadh…	73
BP	GO:0034440	lipid oxidation	49/4218	98/20432	9.62218e-11	2.56271e-08	Pparg/Akt1/Crot/Plin5/Acadvl/Pdk4/Pex7/Pex13/Eci2/Hacl1/Ppara/Slc25a17/Ehhadh/Acat2/Eci1/Cpt1a/Acsl5/Echs1/Hadha/Acadl/Dbi/Adipor1/Phyh/Slc27a2/Acad9/Etfdh/Hadh/Bdh2/Decr1/Mtor/Acox3/Acad10/Acads/Adipor2/Nucb2/Dgat2/Abcd1/Acad8/Acat1/Etfa/Acaa1a/Etfbkmt/Acacb/Mapk14/Fabp1/Hadhb/Acadm/Mlycd/Acad11	49
BP	GO:0006091	generation of precursor metabolites and energy	109/4218	298/20432	1.27142e-10	3.23229e-08	Cox5a/Sdhd/Tbrg4/Hk2/Akt1/Idh3g/Gnmt/Ier3/Crot/Bax/Cs/Rhoa/Ppp1cb/Slc25a13/Aldoc/Mdh2/Cyb561/Igf1/Pnpt1/Galk1/Pygl/Ndufs6/Ppif/Sucla2/Ndufb9/Ppara/Gbe1/Gsk3b/Cox7a2l/Pcdh12/Ndufb8/Sirt3/Idh1/Ndufa10/Fh1/Idh3b/Gnas/Mtfr1/Etfdh/Aldob/Aco1/Vcp/Dyrk2/Gale/Park7/Slc25a33/Mtor/Gbas/Aass/Gfpt1/Gys2/Idh2/Coq7/Phka2/Cox4i1/Nfatc3/Cyp1a2/Cyb5r4/Agl/Gadd45gip1/Phka1/Chchd4/Tkfc/Cox8a/Galt/Gpi1/Phkb/Enpp1/Ci…	109
BP	GO:0072330	monocarboxylic acid biosynthetic process	71/4218	168/20432	1.57796e-10	3.8372e-08	Apoc2/Insig2/Fgfr4/Ggt5/Elovl1/Mid1ip1/Fads1/Acsf3/Ptgds/Lpl/Lta4h/Acadvl/Pdk4/Avpr1a/Acaca/Srebf1/Acly/Elovl2/Oxsm/Rgn/Cyp39a1/Stard4/Fads3/Fasn/Acadl/Pecr/Agxt/Slc45a3/Ptges2/Slc27a2/Acss2/Cyp7a1/Park7/Fam213b/Htt/Ldhb/Slc27a5/Acsm3/Plp1/Msmo1/Tecr/Agt/Sc5d/Apoa5/Lipc/Acsl3/Acsm1/Hacd3/Pnpla8/Decr2/Scd1/Degs1/Elovl3/Baat/Elovl6/Pklr/Acacb/Fads6/Insig1/Mcat/Agmo/Ptges/Thnsl2/Per2/Alox5ap/Nr1h2/Q…	71
BP	GO:0019216	regulation of lipid metabolic process	106/4218	291/20432	2.99753e-10	6.98549e-08	Apoh/Pparg/Akt1/Lmf1/Angptl4/Apoc2/Cyp17a1/Insig2/Psap/Fgfr4/Tek/Cdk4/Cav1/Mid1ip1/Vav2/Vac14/Plin5/H2afy/Ctdnep1/Acadvl/Pdk4/Igf1/Avpr1a/Acsl6/Srebf1/Stat5b/Sptlc2/Gpld1/Ephx2/Ppara/Snai2/Rgn/Stard4/Pcx/Cpt1a/Sf1/Acsl5/Gk/Pdgfa/Idh1/Acadl/Gpr39/Dbi/Slc45a3/Adipor1/Bmp2/Il1a/Cyp7a1/Pik3r3/Mtor/Pdgfra/Atg7/Nucb2/Dgat2/Dkk3/Fgf21/Lamtor1/Acsl4/Rbl2/Eif2ak3/Slc27a1/Smpd3/Agt/Apoa5/Bmp5/Ldlr/Adra2a/H…	106
BP	GO:0016042	lipid catabolic process	98/4218	263/20432	3.36808e-10	7.3684e-08	Apoh/Gm2a/Akt1/Apoc2/Lipe/Crot/Smpd4/Cdk4/Pla2g12b/Plin5/Lpl/Hsd11b1/Plcg1/Acadvl/Smpdl3a/Pex7/Pex13/Sptlc2/Acot2/Gpld1/Eci2/Hexb/Hacl1/Slc25a17/Ehhadh/Acat2/Cyp39a1/Eci1/Lipa/Cpt1a/Acsl5/Plce1/Hexa/Echs1/Hadha/Idh1/Acadl/Dbi/Phyh/Gpcpd1/Slc27a2/Lpin3/Nceh1/Acad9/Etfdh/Hadh/Pla2g12a/Bdh2/Decr1/Cyp7a1/Gba2/Mtor/Acox3/Acad10/Acads/Plbd2/Akr1b8/Fgf21/Gla/Abcd1/Pla2g15/Acad8/Acat1/Apoa5/Lipc/Cyp1a2/E…	98
BP	GO:1901361	organic cyclic compound catabolic process	105/4218	288/20432	3.42532e-10	7.3684e-08	Comt/Snd1/Blvra/Bax/Hmox2/Pan2/Dhx34/Cnp/Lsm2/Khsrp/Skiv2l2/Hsd11b1/Exosc10/Ada/Afmid/Smpdl3a/Enpp3/Nudt4/Supv3l1/Hint1/Mgat1/Rack1/Igfbp3/Pnpt1/Nbas/Pnp/Ephx2/Drosha/Dpys/Pop1/Eif3e/Pycrl/Ncbp2/Rgn/Noct/Cyp39a1/Xdh/Lrpprc/Mtpap/Etf1/Dcp2/Dnase1l3/Exosc7/Upp2/Hnmt/Dut/Adal/Ahcy/Samhd1/Exosc8/Tdo2/Dnase2b/Cyp7a1/Vcp/Pde4b/Pnrc2/Cda/Dffa/Nudt9/Hpd/Pon3/Zc3hav1/Aldh1l1/Fah/Ido2/Lsm6/Nudt7/Dcps/Cyp1a…	105
BP	GO:0022613	ribonucleoprotein complex biogenesis	126/4218	365/20432	3.77065e-10	7.81083e-08	Emg1/Utp20/Wbscr22/Aamp/Lsm2/Rps18/Rpl10/Rps25/Rps5/Pten/Nol3/Skiv2l2/Exosc10/Nol11/Aatf/Ddx39b/Sf3a2/Xpo1/Ddx52/Eral1/Prpf8/Eif5/Mterf3/Drosha/Noct/Gnl1/Rps14/Prpf19/Pdcd11/Gnl3l/Rps24/Clns1a/Exosc7/Nop16/Imp4/Mterf4/Tfb2m/Nop10/Snrpb/Nop56/Exosc8/Eif2a/Adar/Tex10/Nol6/Psip1/Rps6/Srsf10/Ebna1bp2/Gnl2/Mrpl20/Ran/Sfswap/Rpl6/Luc7l2/Strap/Pop4/Mrps11/Rrp8/Rbmx/Pqbp1/Lsm6/Mphosph6/Imp3/Atr/Rpsa/Usp4…	126
BP	GO:0006635	fatty acid beta-oxidation	38/4218	70/20432	5.69844e-10	1.10841e-07	Akt1/Crot/Plin5/Acadvl/Pex7/Eci2/Slc25a17/Ehhadh/Acat2/Eci1/Cpt1a/Acsl5/Echs1/Hadha/Acadl/Dbi/Slc27a2/Acad9/Etfdh/Hadh/Bdh2/Decr1/Mtor/Acox3/Acad10/Acads/Abcd1/Acad8/Acat1/Etfa/Acaa1a/Etfbkmt/Acacb/Fabp1/Hadhb/Acadm/Mlycd/Acad11	38
BP	GO:1901657	glycosyl compound metabolic process	111/4218	312/20432	5.74718e-10	1.10841e-07	Cox5a/Atp5f1/Hk2/Tcirg1/Atp5d/Ier3/Crot/Atp6v1b2/Rhoa/Cad/Slc25a13/Mocs2/Hspa8/Aldoc/Ada/Atp5g3/Pank3/Atp6v0a1/Fuca2/Nudt4/Igf1/Gamt/Guk1/Galk1/Ndufs6/Hmgcr/Ppif/Pnp/Ndufb9/Ppara/Pycrl/Tymp/Umps/Park2/Ndufaf7/Cox7a2l/Bad/Nt5c2/Ndufb8/Atp5b/Tk1/Prps2/Atp5c1/Pdcl3/Ndufa10/Parp1/Atp1b1/Upp2/Adal/Ahcy/Ampd2/Papss1/Aldob/Vcp/Gba2/Ppcs/Gale/Fuca1/Cda/Ak2/Park7/Slc25a33/Klb/Nudt9/Dck/Gbas/Akr1b8/Nt5c3/A…	111
BP	GO:0042180	cellular ketone metabolic process	67/4218	161/20432	1.12193e-09	2.09166e-07	Pparg/Akt1/Apoc2/Cyp17a1/Insig2/Fgfr4/Cav1/Mid1ip1/Kdsr/Plin5/Afmid/Acadvl/Pdk4/Avpr1a/Srebf1/Stat5b/Srd5a1/Hmgcr/Dhrs4/Ppara/Rgn/Cyp21a1/Stard4/Cpt1a/Acsl5/Gk/Acadl/Pnkd/Dbi/Slc45a3/Coq8a/Pdss1/Bmp2/Tdo2/Cyp7a1/Park7/Mtor/Ncor2/Akr1b8/Coq7/Nucb2/Dgat2/Dkk3/Acsl4/Ido2/Eif2ak3/Agt/Apoa5/Bmp5/Gpi1/Pdk2/Bmp6/Kyat1/Kmo/Etfbkmt/Kyat3/Acacb/Prkce/Insig1/Ubiad1/Cbr1/Sirt5/Fabp1/Afp/Nr1h2/Haghl/Mlycd	67
BP	GO:0016125	sterol metabolic process	54/4218	121/20432	2.30133e-09	4.15205e-07	Cyp51/Lmf1/Pon1/Lipe/Insig2/Mvd/Abca1/Cyb5r3/Acadvl/Fdxr/Srebf1/Npc2/0610007P14Rik/Fdft1/Hmgcr/Ebpl/Ephx2/Sqle/Srebf2/App/Cyp39a1/Fech/Lipa/Acadl/Hsd17b7/Abca2/Hmgcs2/Pmvk/Cyp7a1/Dgat2/Ebp/Nsdhl/Msmo1/Sc5d/Apoa5/Ldlr/Lipc/Cln6/Lss/Lcat/Fgf1/Scarb1/Serpina12/Mvk/Hsd3b7/Pcsk9/Insig1/Apof/Sorl1/Lepr/Dhcr7/Fdps/Saa1/Hmgcs1	54
BP	GO:1902652	secondary alcohol metabolic process	53/4218	118/20432	2.44128e-09	4.2669e-07	Cyp51/Lmf1/Pon1/Lipe/Insig2/Fgfr4/Mvd/Abca1/Cyb5r3/Acadvl/Fdxr/Srebf1/Npc2/0610007P14Rik/Fdft1/Hmgcr/Ephx2/Sqle/Srebf2/App/Cyp39a1/Fech/Acadl/Hsd17b7/Abca2/Hmgcs2/Pmvk/Cyp7a1/Dgat2/Ebp/Nsdhl/Fgfr1/Sc5d/Apoa5/Ldlr/Lipc/Cln6/Lss/Lcat/Fgf1/Scarb1/Serpina12/Mvk/Hsd3b7/Pcsk9/Insig1/Apof/Sorl1/Lepr/Dhcr7/Fdps/Saa1/Hmgcs1	53
BP	GO:0044270	cellular nitrogen compound catabolic process	93/4218	254/20432	2.67238e-09	4.52928e-07	Snd1/Blvra/Bax/Hmox2/Pan2/Dhx34/Cnp/Lsm2/Khsrp/Skiv2l2/Exosc10/Ada/Afmid/Smpdl3a/Enpp3/Nudt4/Supv3l1/Hint1/Mgat1/Rack1/Igfbp3/Pnpt1/Nbas/Pnp/Drosha/Dpys/Pop1/Eif3e/Pycrl/Ncbp2/Rgn/Noct/Xdh/Lrpprc/Mtpap/Etf1/Dcp2/Dnase1l3/Exosc7/Acadl/Upp2/Hnmt/Dut/Adal/Ahcy/Samhd1/Exosc8/Tdo2/Dnase2b/Vcp/Pde4b/Pnrc2/Cda/Dffa/Nudt9/Zc3hav1/Aldh1l1/Ido2/Lsm6/Nudt7/Dcps/Nt5e/Mlh1/Dpyd/Nudt15/Galt/Aifm1/Lsm1/Enpp1/As…	93
BP	GO:0006633	fatty acid biosynthetic process	57/4218	132/20432	3.76409e-09	6.19193e-07	Apoc2/Insig2/Ggt5/Elovl1/Mid1ip1/Fads1/Acsf3/Ptgds/Lpl/Lta4h/Acadvl/Pdk4/Avpr1a/Acaca/Srebf1/Acly/Elovl2/Oxsm/Rgn/Fads3/Fasn/Acadl/Pecr/Slc45a3/Ptges2/Acss2/Fam213b/Acsm3/Plp1/Msmo1/Tecr/Agt/Sc5d/Apoa5/Lipc/Acsl3/Acsm1/Hacd3/Pnpla8/Decr2/Scd1/Degs1/Elovl3/Elovl6/Acacb/Fads6/Insig1/Mcat/Agmo/Ptges/Thnsl2/Alox5ap/Nr1h2/Qk/Hacd1/Ptges3/Mlycd	57
BP	GO:0046700	heterocycle catabolic process	93/4218	256/20432	4.22146e-09	6.74589e-07	Snd1/Blvra/Bax/Hmox2/Pan2/Dhx34/Cnp/Lsm2/Khsrp/Skiv2l2/Exosc10/Ada/Afmid/Smpdl3a/Enpp3/Nudt4/Supv3l1/Hint1/Mgat1/Rack1/Igfbp3/Pnpt1/Nbas/Pnp/Drosha/Dpys/Pop1/Eif3e/Pycrl/Ncbp2/Rgn/Noct/Xdh/Lrpprc/Mtpap/Etf1/Dcp2/Dnase1l3/Exosc7/Upp2/Hnmt/Dut/Adal/Ahcy/Samhd1/Exosc8/Tdo2/Dnase2b/Vcp/Pde4b/Pnrc2/Cda/Dffa/Nudt9/Pon3/Zc3hav1/Aldh1l1/Ido2/Lsm6/Nudt7/Dcps/Nt5e/Mlh1/Dpyd/Nudt15/Galt/Aifm1/Lsm1/Enpp1/Asp…	93
BP	GO:1901565	organonitrogen compound catabolic process	88/4218	239/20432	5.17247e-09	8.02457e-07	Comt/Gm2a/Ftcd/Blvra/Prodh/Hmox2/Smpd4/Hyal2/Lta4h/Ada/Afmid/Smpdl3a/Nudt4/Pah/Hint1/Rack1/Hexb/Glud1/Pnp/Dpys/Pycrl/Csad/Acy1/Lnpep/Xdh/Cndp2/Gldc/Xpnpep1/Got1/Cpn1/Hexa/Paox/Acadl/Rnpepl1/Agxt/Hnmt/Dut/Adal/Ahcy/Samhd1/Tdo2/Enpep/Vcp/Gba2/Pde4b/Cda/Ppat/Nudt9/Hpd/Aass/Aldh1l1/Fah/Lyve1/Gla/Ido2/Got2/Nudt7/Acad8/Bckdhb/Ctsh/Nt5e/Amt/Cdo1/Dpyd/Nudt15/Gcsh/Uroc1/Neu3/Aspg/Aspdh/Fam206a/Cpq/Kmo/Pde…	88
BP	GO:0009141	nucleoside triphosphate metabolic process	86/4218	232/20432	5.30858e-09	8.02457e-07	Cox5a/Atp5f1/Hk2/Tcirg1/Atp5d/Ier3/Atp6v1b2/Rhoa/Cad/Slc25a13/Mocs2/Hspa8/Aldoc/Ada/Atp5g3/Atp6v0a1/Smpdl3a/Enpp3/Igf1/Guk1/Galk1/Ndufs6/Ppif/Pnp/Ndufb9/Ppara/Park2/Ndufaf7/Cox7a2l/Bad/Ndufb8/Atp5b/Atp5c1/Ndufa10/Parp1/Atp1b1/Dut/Samhd1/Ampd2/Aldob/Vcp/Gale/Ak2/Park7/Slc25a33/Gbas/Coq7/Cox4i1/Nme6/Nudt15/Gadd45gip1/Tkfc/Cox8a/Galt/Gpi1/Enpp1/Atp5l/Pklr/Ak7/Tspo/Ndufa7/Dctpp1/Pid1/Slc25a23/Tefm/En…	86
BP	GO:0009116	nucleoside metabolic process	103/4218	294/20432	6.09161e-09	8.96588e-07	Cox5a/Atp5f1/Hk2/Tcirg1/Atp5d/Ier3/Crot/Atp6v1b2/Rhoa/Cad/Slc25a13/Mocs2/Hspa8/Aldoc/Ada/Atp5g3/Pank3/Atp6v0a1/Nudt4/Igf1/Gamt/Guk1/Galk1/Ndufs6/Hmgcr/Ppif/Pnp/Ndufb9/Ppara/Pycrl/Tymp/Umps/Park2/Ndufaf7/Cox7a2l/Bad/Nt5c2/Ndufb8/Atp5b/Tk1/Prps2/Atp5c1/Pdcl3/Ndufa10/Parp1/Atp1b1/Upp2/Adal/Ahcy/Ampd2/Papss1/Aldob/Vcp/Ppcs/Gale/Cda/Ak2/Park7/Slc25a33/Nudt9/Dck/Gbas/Nt5c3/Coq7/Nudt7/Cox4i1/Nt5e/Nme6/A…	103
BP	GO:0006511	ubiquitin-dependent protein catabolic process	155/4218	493/20432	7.95071e-09	1.14021e-06	Trim25/Rmnd5b/Fbxo9/Akt1/Sdf2/Psmc3/Rmnd5a/Btbd2/Rad23a/Jkamp/Crbn/Snf8/Rnf114/Ubqln4/Derl3/Ube2g2/Ppp2cb/Faf1/Pten/Ube2z/Sqstm1/Nfe2l2/Ube2a/Ppp2r5c/Smurf2/Derl2/Rnf145/Cops3/Psen1/Hsp90b1/Sumo3/Erlec1/Rack1/Ube2b/Rnf185/Ubxn2a/Rnf144a/Psmc5/Psma6/Nkd2/Fbxl3/Rnf19a/Fbxo32/Sharpin/Gsk3b/Park2/Ubr2/Axin1/Anks1/Wac/Rnf138/Bag6/Nedd4l/Btbd1/Btrc/Arih1/Huwe1/Pdcl3/Tor1a/Rbck1/Fbxw7/Vcp/Usp24/Usp1/Ube…	155
BP	GO:0006066	alcohol metabolic process	86/4218	234/20432	8.50323e-09	1.18896e-06	Cyp51/Lmf1/Pon1/Lipe/Insig2/Fgfr4/Mvd/Aldh3a2/Dhdds/Mogat1/Pten/Abca1/Plcg1/Cyb5r3/Acadvl/Fdxr/Nudt4/Srebf1/Galk1/Sptlc2/Npc2/0610007P14Rik/Fdft1/Hmgcr/Plpp1/Ephx2/Dhrs4/Sqle/Srebf2/App/Synj2/Cyp39a1/Impa2/Fech/Chka/Rbp4/Gk/Got1/Acadl/Pecr/Hsd17b7/Dpm2/Abca2/Impa1/Hmgcs2/Pmvk/Cyp7a1/Akr1b8/Dgat2/Ebp/Nsdhl/Fgfr1/Sc5d/Apoa5/Ldlr/Lipc/Cln6/Lss/Ppip5k1/Tkfc/Lcat/Fgf1/Scarb1/Ephx1/Serpina12/Mvk/Grk3/H…	86
BP	GO:0031647	regulation of protein stability	78/4218	207/20432	1.16811e-08	1.59347e-06	Ift46/Calr/Phb2/Tmem147/Cct4/Pten/Chp1/Hspa8/Lamp2/Nlk/Pfn1/Tada2a/Qrsl1/Igf1/Tcf3/Ube2b/Srebf1/Stxbp4/Tert/Naa16/Fbxl3/Cct5/Stk3/Gpihbp1/Prkdc/Park2/Pim1/Telo2/Bag6/Hdac3/Cdc37l1/Btrc/Gnl3l/Cct8/Get4/Cdc73/Atp1b1/Dpm2/Bmp2/Pdcd10/Fbxw7/P3h1/Per3/Park7/Apbb2/Psmd8/Otud5/Hdac6/Flna/Hcfc1/Rnf128/Vps35/Ifi30/Usp2/Pin1/Usp28/Ctsh/Usp3/Usp4/Ank2/Lss/Ccar2/Sh3glb1/Rnf139/Cdkn2aip/Mylip/Wfs1/Stub1/Pik3r…	78
BP	GO:0007034	vacuolar transport	88/4218	243/20432	1.29461e-08	1.72399e-06	Snapin/Chmp2b/Ap1s1/Fgfr4/Snx6/Snf8/Evi5/Abca1/Hspa8/Lamp2/Vps53/Ap4m1/Rab32/Vps26a/Rab21/Rab10/Ankfy1/Stx8/Vti1b/Trim27/Kif13a/Zfyve16/E430025E21Rik/Emp2/Rab12/Ehd3/Dpy30/Vps52/Ndfip1/Ehd1/Gbf1/Agap2/Pikfyve/Fcgr2b/Rab14/Sdccag3/Lrp2/Vps16/Snx5/Snx16/Lrba/Atp6v0d2/Chmp5/Rgp1/Eps15/Htt/Nsg1/Tbc1d14/Scarb2/Vps33a/Vps29/Tmem106b/Coro1a/Flna/Fgfr1/Vps35/Trak1/Rab6b/Snx33/Trappc8/Tbc1d10a/Ankrd27/Bec…	88
BP	GO:0017038	protein import	107/4218	314/20432	1.7169e-08	2.23316e-06	Akt1/Emd/Timm44/Tomm40/Sri/Kpna6/Phb2/Rab23/Tomm40l/Tek/Pttg1ip/Dmap1/Hyal2/Faf1/Tnpo3/Timm23/Chp1/Nol3/Hspa8/Akap1/Pex12/Pex7/Igf1/Pbld1/Pex13/Sptbn1/Slc9a3r1/Timm9/Ppm1a/Hsp90aa1/Nup153/Bmpr1a/Kpna3/Fgf9/Angpt1/Tomm22/Gpihbp1/Snai2/Gsk3b/Hcls1/Cdkn1a/Hsp90ab1/Axin1/Bambi/Hdac3/Smad4/Grpel2/Timm21/Parp1/Timm10/Pex16/Rbck1/Pkia/Tlr2/Lmna/Ppp3ca/Txn1/Dyrk2/Prdx1/Mtor/Htt/Ran/Tnfrsf1a/Chp2/Timm17b/…	107
BP	GO:0008203	cholesterol metabolic process	50/4218	114/20432	1.79878e-08	2.2865e-06	Cyp51/Lmf1/Pon1/Lipe/Insig2/Mvd/Abca1/Cyb5r3/Acadvl/Fdxr/Srebf1/Npc2/Fdft1/Hmgcr/Ephx2/Sqle/Srebf2/App/Cyp39a1/Fech/Acadl/Hsd17b7/Abca2/Hmgcs2/Pmvk/Cyp7a1/Dgat2/Ebp/Nsdhl/Sc5d/Apoa5/Ldlr/Lipc/Cln6/Lss/Lcat/Fgf1/Scarb1/Serpina12/Mvk/Hsd3b7/Pcsk9/Insig1/Apof/Sorl1/Lepr/Dhcr7/Fdps/Saa1/Hmgcs1	50
BP	GO:0006913	nucleocytoplasmic transport	127/4218	390/20432	1.85454e-08	2.30498e-06	Akt1/Emd/Sri/Ier3/Kpna6/Calr/Phb2/Ppp1cc/Rab23/Tek/Pttg1ip/Dmap1/Hyal2/Faf1/Tnpo3/Chp1/Nol3/Hspa8/Akap1/Ddx39b/Igf1/Pbld1/Xpo1/Sptbn1/Dnajc27/Slc9a3r1/Nemf/Ppm1a/Hsp90aa1/Nup153/Bmpr1a/Kpna3/Fgf9/Angpt1/Rangap1/Snai2/Gsk3b/Hcls1/Cdkn1a/Hsp90ab1/Axin1/Bambi/Iws1/Hdac3/Smad4/Parp1/Rbck1/Pkia/Tlr2/Lmna/Ppp3ca/Anp32b/Txn1/Nol6/Dyrk2/Srsf10/Prdx1/Park7/Mtor/Htt/Ran/Tnfrsf1a/Chp2/Flna/Gas6/Rbpms/Agt/Rp…	127
BP	GO:0015980	energy derivation by oxidation of organic compounds	81/4218	220/20432	2.07561e-08	2.52368e-06	Cox5a/Sdhd/Tbrg4/Akt1/Idh3g/Gnmt/Bax/Cs/Ppp1cb/Slc25a13/Mdh2/Igf1/Pnpt1/Pygl/Ndufs6/Sucla2/Ndufb9/Gbe1/Gsk3b/Pcdh12/Ndufb8/Sirt3/Idh1/Ndufa10/Fh1/Idh3b/Gnas/Mtfr1/Aco1/Vcp/Dyrk2/Park7/Mtor/Gfpt1/Gys2/Idh2/Coq7/Phka2/Cox4i1/Nfatc3/Cyp1a2/Agl/Phka1/Chchd4/Cox8a/Phkb/Enpp1/Cisd1/Ndufv1/Chchd5/Ppp1ca/Mybbp1a/Ndufa7/Cox10/Slc25a23/Ppp1r2/Stbd1/Bdnf/Adra1b/Suclg1/Epm2a/Per2/Adgrf5/Fxn/Uqcr10/Trp53/Acad…	81
BP	GO:0009123	nucleoside monophosphate metabolic process	82/4218	224/20432	2.29495e-08	2.70532e-06	Cox5a/Atp5f1/Hk2/Tcirg1/Atp5d/Ier3/Atp6v1b2/Rhoa/Slc25a13/Hspa8/Aldoc/Ada/Atp5g3/Atp6v0a1/Nudt4/Igf1/Guk1/Galk1/Ndufs6/Ppif/Ndufb9/Ppara/Umps/Park2/Ndufaf7/Cox7a2l/Bad/Nt5c2/Ndufb8/Atp5b/Prps2/Tyms/Atp5c1/Ndufa10/Parp1/Atp1b1/Dut/Ampd2/Aldob/Vcp/Gale/Ak2/Park7/Slc25a33/Ppat/Paics/Nudt9/Gbas/Coq7/Cox4i1/Nt5e/Gadd45gip1/Tkfc/Cox8a/Galt/Gpi1/Atp5l/Dnph1/Pklr/Tspo/Ndufa7/Pid1/Slc25a23/Tefm/Eno4/Bdnf/…	82
BP	GO:0002181	cytoplasmic translation	28/4218	49/20432	2.32175e-08	2.70532e-06	Rpl8/Rplp1/Rpl15/Cpeb4/Rplp2/Cpeb1/Eif3m/Eif3j1/Rpl22/Rpl6/Eif3f/Nck1/Eef2/Rpl22l1/Cpeb3/Ythdf2/Rpl7/Rpl9/Rpl29/Pcbp2/Rpl36/Eif4b/Rpl35a/Rpl26/Gspt1/Rpl7l1/Rplp0/Rpl31	28
BP	GO:0046486	glycerolipid metabolic process	90/4218	254/20432	2.94429e-08	3.3607e-06	Apoh/Ocrl/Lmf1/Apoc2/Lipe/Insig2/Smpd4/Cav1/Pigyl/Plin5/Mogat1/Pten/Lpl/Serinc3/Ctdnep1/Acsl1/Acsl6/Srebf1/Efr3b/Gpld1/Plpp1/Mtmr6/Chkb/Pigp/Rgn/Pigx/Synj2/Pigf/Impa2/Chka/Cpt1a/Acsl5/Gk/Pi4k2a/Cyp2e1/Pdgfa/Pikfyve/Dbi/Pigc/Dpm2/Gpcpd1/Crls1/Lpin3/Impa1/Pip5k1a/Pigo/Agpat9/Pik3c2g/Slc27a5/Cdipt/Dgat2/Fgf21/Pgap2/Acsl4/Slc27a1/Pla2g15/Apoa5/Ldlr/Lipc/Pik3cb/Ip6k2/Dgkh/Thrsp/Tmem55b/Pnpla8/Scd1/Sca…	90
BP	GO:0009119	ribonucleoside metabolic process	97/4218	280/20432	3.14963e-08	3.52318e-06	Cox5a/Atp5f1/Hk2/Tcirg1/Atp5d/Ier3/Crot/Atp6v1b2/Rhoa/Cad/Slc25a13/Mocs2/Hspa8/Aldoc/Ada/Atp5g3/Pank3/Atp6v0a1/Nudt4/Igf1/Gamt/Guk1/Galk1/Ndufs6/Hmgcr/Ppif/Pnp/Ndufb9/Ppara/Pycrl/Umps/Park2/Ndufaf7/Cox7a2l/Bad/Nt5c2/Ndufb8/Atp5b/Prps2/Atp5c1/Pdcl3/Ndufa10/Parp1/Atp1b1/Adal/Ahcy/Ampd2/Papss1/Aldob/Vcp/Ppcs/Gale/Cda/Ak2/Park7/Slc25a33/Nudt9/Gbas/Nt5c3/Coq7/Nudt7/Cox4i1/Nt5e/Nme6/Acpp/Gadd45gip1/Tkf…	97
BP	GO:0046128	purine ribonucleoside metabolic process	92/4218	262/20432	3.4069e-08	3.73623e-06	Cox5a/Atp5f1/Hk2/Tcirg1/Atp5d/Ier3/Crot/Atp6v1b2/Rhoa/Slc25a13/Mocs2/Hspa8/Aldoc/Ada/Atp5g3/Pank3/Atp6v0a1/Nudt4/Igf1/Gamt/Guk1/Galk1/Ndufs6/Hmgcr/Ppif/Pnp/Ndufb9/Ppara/Park2/Ndufaf7/Cox7a2l/Bad/Nt5c2/Ndufb8/Atp5b/Prps2/Atp5c1/Ndufa10/Parp1/Atp1b1/Adal/Ahcy/Ampd2/Papss1/Aldob/Vcp/Ppcs/Gale/Ak2/Park7/Slc25a33/Nudt9/Gbas/Nt5c3/Coq7/Nudt7/Cox4i1/Nt5e/Nme6/Acpp/Gadd45gip1/Tkfc/Cox8a/Galt/Gpi1/Enpp1/A…	92
BP	GO:0051188	cofactor biosynthetic process	54/4218	129/20432	3.50144e-08	3.76325e-06	Haao/Fpgs/Mocs2/Qdpr/Pank3/Pdk4/Pcbd1/Acly/Mthfd1/Dhfr/Nadk2/Cpox/Fech/Iscu/Coq8a/Mpc2/Mmadhc/Pdss1/Acss2/Bdh2/Alad/Ppcs/Nadk/Tpk1/Idh2/Coq7/Qprt/Nadsyn1/Ciapin1/Fam96a/Nmnat3/Spr/Gch1/Mat1a/Nmrk1/Aspdh/Pdk2/Rsad1/Nubp2/Kmo/Mthfd1l/Acacb/Mat2b/Cox10/Flad1/Isca1/Ubiad1/Mat2a/Fxn/Ppox/Mocs1/Mthfs/Mlycd/Mthfsl	54
BP	GO:0051169	nuclear transport	127/4218	394/20432	3.6132e-08	3.76325e-06	Akt1/Emd/Sri/Ier3/Kpna6/Calr/Phb2/Ppp1cc/Rab23/Tek/Pttg1ip/Dmap1/Hyal2/Faf1/Tnpo3/Chp1/Nol3/Hspa8/Akap1/Ddx39b/Igf1/Pbld1/Xpo1/Sptbn1/Dnajc27/Slc9a3r1/Nemf/Ppm1a/Hsp90aa1/Nup153/Bmpr1a/Kpna3/Fgf9/Angpt1/Rangap1/Snai2/Gsk3b/Hcls1/Cdkn1a/Hsp90ab1/Axin1/Bambi/Iws1/Hdac3/Smad4/Parp1/Rbck1/Pkia/Tlr2/Lmna/Ppp3ca/Anp32b/Txn1/Nol6/Dyrk2/Srsf10/Prdx1/Park7/Mtor/Htt/Ran/Tnfrsf1a/Chp2/Flna/Gas6/Rbpms/Agt/Rp…	127
BP	GO:0042278	purine nucleoside metabolic process	93/4218	266/20432	3.64949e-08	3.76325e-06	Cox5a/Atp5f1/Hk2/Tcirg1/Atp5d/Ier3/Crot/Atp6v1b2/Rhoa/Slc25a13/Mocs2/Hspa8/Aldoc/Ada/Atp5g3/Pank3/Atp6v0a1/Nudt4/Igf1/Gamt/Guk1/Galk1/Ndufs6/Hmgcr/Ppif/Pnp/Ndufb9/Ppara/Park2/Ndufaf7/Cox7a2l/Bad/Nt5c2/Ndufb8/Atp5b/Prps2/Atp5c1/Ndufa10/Parp1/Atp1b1/Adal/Ahcy/Ampd2/Papss1/Aldob/Vcp/Ppcs/Gale/Ak2/Park7/Slc25a33/Nudt9/Gbas/Nt5c3/Coq7/Nudt7/Cox4i1/Nt5e/Nme6/Acpp/Gadd45gip1/Tkfc/Cox8a/Galt/Gpi1/Enpp1/A…	93
BP	GO:0006457	protein folding	62/4218	156/20432	3.70068e-08	3.76325e-06	Pfdn5/Chordc1/Fkbp11/Calr/Dnaja3/Pfdn2/Cct4/Clpx/Hspa8/Calr3/Hsp90b1/Pdia6/Fkbp3/Tmx1/Hsp90aa1/Cwc27/Ppif/Cct5/St13/Txndc11/Hsp90ab1/Pfdn6/Pfdn1/Ppic/Grpel2/Cdc37l1/Prdx4/Cct8/Hspa4l/Tor1b/Tor1a/Pdia3/Mkks/Txn1/P3h1/Ube4b/Hsph1/Erp27/Emc3/Fkbp4/Unc45a/Vbp1/Aars/Dnaja4/Chchd4/Dnajb5/Qsox2/Tbcc/Sh3glb1/Mesdc2/Txndc5/Tbce/Stub1/Tbca/Emc6/Nudcd3/Fkbp2/B2m/Fkbp15/Tcp1/Ptges3/Hspe1	62
BP	GO:0034504	protein localization to nucleus	116/4218	353/20432	4.34965e-08	4.34422e-06	Cav2/Col1a1/Akt1/Emd/Sri/Kpna6/Calr/Phb2/Rab23/Tek/Cct4/Bmp7/Pttg1ip/Dmap1/Hyal2/Faf1/Tnpo3/Chp1/Nol3/Hspa8/Akap1/Ctdnep1/Cdk5rap3/Fyn/Igf1/Pbld1/Sumo3/Xpo1/Sptbn1/Slc9a3r1/Ppm1a/Hsp90aa1/Nup153/Tert/Bmpr1a/Kpna3/Fgf9/Cct5/Angpt1/Snai2/Gsk3b/Hcls1/Cdkn1a/Hsp90ab1/Axin1/Bambi/Hdac3/Smad4/Trim8/Cct8/Pikfyve/Parp1/Tor1a/Rbck1/Pkia/Tlr2/Lmna/Ppp3ca/Txn1/Dyrk2/Prdx1/Park7/Mtor/Htt/Ran/Tnfrsf1a/Chp2/Fl…	116
BP	GO:0048193	Golgi vesicle transport	70/4218	185/20432	5.30426e-08	5.20469e-06	Lman2l/Ergic1/Lmf1/Use1/Cog1/Ap4m1/Arf5/Nbas/Rab10/Ankfy1/Scfd1/Vti1b/Exoc2/Nkd2/Ehd3/Spast/Atp9b/Scyl1/Gbf1/Copa/Rab14/Sec23b/Atp9a/Vcp/Eps15/Rint1/Htt/Stx18/Nrbp1/Tbc1d14/Chic2/Vps29/Cux1/Gcc1/Exoc4/Ergic2/Cog4/Cog8/Gabarapl2/Trappc4/Zw10/Rab6b/Dnm2/Trappc8/Nsf/Mia2/Sec24a/Rnf139/Prkci/Gcc2/Sgsm2/Creb3l2/Dnajc28/Lman1/Wipi1/Insig1/Whamm/Stxbp6/Trappc1/Sorl1/Arf3/Cope/Tgoln1/Tgoln2/Rab31/Tmed9/C…	70
BP	GO:0009161	ribonucleoside monophosphate metabolic process	79/4218	217/20432	5.41049e-08	5.21739e-06	Cox5a/Atp5f1/Hk2/Tcirg1/Atp5d/Ier3/Atp6v1b2/Rhoa/Slc25a13/Hspa8/Aldoc/Ada/Atp5g3/Atp6v0a1/Nudt4/Igf1/Guk1/Galk1/Ndufs6/Ppif/Ndufb9/Ppara/Umps/Park2/Ndufaf7/Cox7a2l/Bad/Nt5c2/Ndufb8/Atp5b/Prps2/Atp5c1/Ndufa10/Parp1/Atp1b1/Ampd2/Aldob/Vcp/Gale/Ak2/Park7/Slc25a33/Ppat/Paics/Nudt9/Gbas/Coq7/Cox4i1/Nt5e/Gadd45gip1/Tkfc/Cox8a/Galt/Gpi1/Atp5l/Pklr/Tspo/Ndufa7/Pid1/Slc25a23/Tefm/Eno4/Bdnf/Chchd10/Atp5k/G…	79
BP	GO:0042176	regulation of protein catabolic process	102/4218	302/20432	6.09312e-08	5.57686e-06	Akt1/Dlgap1/Ier3/Rad23a/Snf8/Rnf114/Ubqln4/Derl3/Pttg1ip/Ube2g2/Faf1/Odc1/Atraid/Pten/Derl2/Cdk5rap3/Ubb/Fyn/Psen1/Sumo3/Rhbdf1/Xpo1/Erlec1/Rack1/Ubxn2a/Rnf144a/Gpld1/Nkd2/Lpcat1/Psme1/Rnf19a/Gsk3b/Rgn/Park2/Axin1/Anks1/Wac/Rnf138/Bag6/Ndfip1/Smad4/Nedd4l/Btrc/Arih1/Agap2/Pdcl3/Rhbdd1/Serpine2/Sh3d19/Fbxw7/Vcp/Rgp1/Azin2/Park7/Mad2l2/Mad2l1/Atg7/Ctsc/Rnf40/Cul4b/Flna/Gabarapl2/Pin1/Gclc/Trib1/Snx…	102
BP	GO:0010498	proteasomal protein catabolic process	116/4218	355/20432	6.13856e-08	5.57686e-06	Rmnd5b/Fbxo9/Akt1/Sdf2/Psmc3/Rmnd5a/Dlgap1/Btbd2/Rad23a/Jkamp/Crbn/Rnf114/Ubqln4/Derl3/Ube2g2/Ppp2cb/Faf1/Nfe2l2/Ube2a/Ppp2r5c/Derl2/Rnf145/Ubb/Psen1/Hsp90b1/Rhbdf1/Erlec1/Rack1/Ube2b/Rnf185/Ubxn2a/Rnf144a/Psmc5/Nkd2/Fbxl3/Psme1/Rnf19a/Sharpin/Gsk3b/Park2/Ubr2/Axin1/Wac/Rnf138/Bag6/Nedd4l/Prpf19/Btbd1/Btrc/Arih1/Rnf41/Agxt/Tor1a/Rbck1/Fbxw7/Vcp/Ube4b/Park7/Anapc4/Clock/Cul1/Atg7/Psmd8/Rnf40/Otud5…	116
BP	GO:0006979	response to oxidative stress	111/4218	336/20432	6.1694e-08	5.57686e-06	Hnrnpd/Prkra/Pnkp/Hmox2/Psap/Gpx6/Aqp1/Hspb1/Met/Ppp2cb/Aldh3a2/Hyal2/Ndufs2/Nol3/Nfe2l2/Glrx2/Pcgf2/Hdac2/Psen1/Rack1/Pnpt1/Pxdn/Fut8/Net1/Fos/Ripk1/Glrx/Dhfr/Ppif/App/Rcan1/Rgn/Park2/Ercc3/Ankrd2/Idh1/Scly/Parp1/Lcn2/Nr4a2/Abl1/Tor1a/Itgav/Atrn/Car3/Chrna4/Etfdh/Pdcd10/Casp6/Fbxw7/Gclm/Xpa/Txn1/Psip1/Prdx1/Hgf/Park7/Cd38/Pdgfra/Hsph1/Atg7/Coq7/Rps3/Stx4a/Hdac6/Rbpms/Sesn3/Neil1/Gclc/Nup93/Nudt1…	111
BP	GO:0009167	purine ribonucleoside monophosphate metabolic process	78/4218	214/20432	6.18211e-08	5.57686e-06	Cox5a/Atp5f1/Hk2/Tcirg1/Atp5d/Ier3/Atp6v1b2/Rhoa/Slc25a13/Hspa8/Aldoc/Ada/Atp5g3/Atp6v0a1/Nudt4/Igf1/Guk1/Galk1/Ndufs6/Ppif/Ndufb9/Ppara/Park2/Ndufaf7/Cox7a2l/Bad/Nt5c2/Ndufb8/Atp5b/Prps2/Atp5c1/Ndufa10/Parp1/Atp1b1/Ampd2/Aldob/Vcp/Gale/Ak2/Park7/Slc25a33/Ppat/Paics/Nudt9/Gbas/Coq7/Cox4i1/Nt5e/Gadd45gip1/Tkfc/Cox8a/Galt/Gpi1/Atp5l/Pklr/Tspo/Ndufa7/Pid1/Slc25a23/Tefm/Eno4/Bdnf/Chchd10/Atp5k/Gapdh/…	78
BP	GO:0006639	acylglycerol metabolic process	46/4218	105/20432	6.87441e-08	6.10295e-06	Apoh/Lmf1/Apoc2/Lipe/Insig2/Cav1/Plin5/Mogat1/Lpl/Ctdnep1/Acsl1/Acsl6/Srebf1/Gpld1/Plpp1/Rgn/Cpt1a/Acsl5/Gk/Cyp2e1/Dbi/Lpin3/Agpat9/Slc27a5/Dgat2/Fgf21/Acsl4/Apoa5/Ldlr/Lipc/Dgkh/Thrsp/Scd1/Scarb1/Abhd2/Serpina12/Pnpla3/Pcsk9/Insig1/Apof/Fitm2/Mogat2/Ces1d/Ces1g/Nr1h2/Gpx1	46
BP	GO:0045834	positive regulation of lipid metabolic process	56/4218	138/20432	7.16865e-08	6.26473e-06	Apoh/Pparg/Akt1/Angptl4/Apoc2/Cyp17a1/Tek/Mid1ip1/Vav2/Plin5/Ctdnep1/Igf1/Avpr1a/Acsl6/Srebf1/Sptlc2/Gpld1/Ppara/Rgn/Stard4/Pcx/Cpt1a/Acsl5/Dbi/Slc45a3/Il1a/Cyp7a1/Mtor/Pdgfra/Nucb2/Dgat2/Fgf21/Smpd3/Agt/Apoa5/Ldlr/Hsd17b13/Fgf1/Sh3glb1/Scd1/Scarb1/Bmp6/Ambra1/Pla2g6/Prkce/Agtr1a/Fgfr3/Fabp1/Adgrf5/Ptk2b/Fdps/Nr1h2/Klk1b4/Mlycd/Tnfaip8l3/Mup1	56
BP	GO:0034976	response to endoplasmic reticulum stress	75/4218	204/20432	7.30439e-08	6.28515e-06	Trim25/Sdf2/Psmc3/Bax/Jkamp/Eif2ak4/Tbl2/Derl3/Ube2g2/Ppp2cb/Nfe2l2/Serinc3/Derl2/Cdk5rap3/Hsp90b1/Erlec1/Rnf185/Pdia6/Psmc5/Tmx1/Txndc11/Gsk3b/Park2/Eif2ak2/Bag6/Get4/Rhbdd1/Tor1a/Pdia3/Ptpn1/Vcp/Ube4b/Park7/Erp27/Anks4b/Eif2ak3/Aars/Stt3b/Nck1/Uba5/Pomt2/Creb3l3/Trim13/Aifm1/Rnf139/Tmem33/Edem2/Creb3l2/Txndc5/Pomt1/Wfs1/Stub1/Thbs1/Ufl1/Os9/Scamp5/Pik3r1/Pla2g6/Selk/Usp14/AI314180/Bhlha15/Rnf10…	75
BP	GO:0009126	purine nucleoside monophosphate metabolic process	78/4218	215/20432	7.75893e-08	6.5751e-06	Cox5a/Atp5f1/Hk2/Tcirg1/Atp5d/Ier3/Atp6v1b2/Rhoa/Slc25a13/Hspa8/Aldoc/Ada/Atp5g3/Atp6v0a1/Nudt4/Igf1/Guk1/Galk1/Ndufs6/Ppif/Ndufb9/Ppara/Park2/Ndufaf7/Cox7a2l/Bad/Nt5c2/Ndufb8/Atp5b/Prps2/Atp5c1/Ndufa10/Parp1/Atp1b1/Ampd2/Aldob/Vcp/Gale/Ak2/Park7/Slc25a33/Ppat/Paics/Nudt9/Gbas/Coq7/Cox4i1/Nt5e/Gadd45gip1/Tkfc/Cox8a/Galt/Gpi1/Atp5l/Pklr/Tspo/Ndufa7/Pid1/Slc25a23/Tefm/Eno4/Bdnf/Chchd10/Atp5k/Gapdh/…	78
BP	GO:0009108	coenzyme biosynthetic process	41/4218	90/20432	9.35307e-08	7.80772e-06	Haao/Fpgs/Mocs2/Qdpr/Pank3/Pdk4/Pcbd1/Acly/Mthfd1/Dhfr/Nadk2/Coq8a/Mpc2/Mmadhc/Pdss1/Acss2/Ppcs/Nadk/Tpk1/Idh2/Coq7/Qprt/Nadsyn1/Nmnat3/Spr/Gch1/Mat1a/Nmrk1/Aspdh/Pdk2/Kmo/Mthfd1l/Acacb/Mat2b/Flad1/Ubiad1/Mat2a/Mocs1/Mthfs/Mlycd/Mthfsl	41
BP	GO:0031329	regulation of cellular catabolic process	101/4218	301/20432	1.01583e-07	8.35521e-06	Apoh/Akt1/Apoc2/Dlgap1/Rad23a/Bax/Dhx34/Rnf114/Ubqln4/Pttg1ip/Plin5/Atraid/Pten/Ppp1cb/Hsd11b1/Cdk5rap3/Ubb/Psen1/Igf1/Supv3l1/Sumo3/Rhbdf1/Rack1/Igfbp3/Pnpt1/Nbas/Rnf144a/Sptlc2/Gpld1/Nkd2/Psme1/Rnf19a/Gsk3b/Rgn/Park2/Lrpprc/Axin1/Anks1/Wac/Rnf138/Bag6/Cpt1a/Acsl5/Btrc/Arih1/Idh1/Pdcl3/Dbi/Ptpn1/Sh3d19/Fbxw7/Vcp/Rgp1/Park7/Dffa/Mtor/Zc3hav1/Atg7/Ctsc/Rnf40/Fgf21/Gabarapl2/Apoa5/Gclc/Trib1/Snx33/…	101
BP	GO:0010035	response to inorganic substance	113/4218	347/20432	1.10634e-07	8.96778e-06	Pparg/Hnrnpd/Haao/Pon1/Cdkn1b/Fosb/Psap/Aqp1/Cyp2a5/Atp7b/Cdk4/Cav1/Met/Ppp2cb/Slc41a1/Nol3/Slc25a13/Nfe2l2/Fnta/Glrx2/Pcgf2/Krt10/Hdac2/Avpr1a/Rack1/Net1/Fos/Gpld1/Ripk1/Pdcd6/Glrx/Dhfr/Glud1/Ppif/Mylk/Hrg/Rgn/Xdh/Cuta/Nedd4l/Fas/Abcc2/Nptx1/Slc40a1/Gpr39/Parp1/Lcn2/Nr4a2/Abl1/Itgav/Gatm/Il1a/Anxa5/Pdcd10/Casp6/Ppp3ca/Aldob/Txn1/Alad/Aco1/Prdx1/Pef1/Hgf/Park7/Htt/Slc30a3/Hsph1/Blm/Mef2a/Rps3/Fus…	113
BP	GO:0010876	lipid localization	105/4218	317/20432	1.19643e-07	9.55948e-06	Apoh/Pparg/Gm2a/Akt1/Pon1/Apoc2/Crot/Cav1/Pla2g12b/Plin5/Retn/Abca1/Lpl/C1qtnf1/Acsl1/Abca5/Cry1/Acsl6/Slc9a3r1/Abcc3/Stat5b/Npc2/Hexb/Lrp10/Fitm1/Ppara/Slc25a17/Srebf2/Gpihbp1/Slc10a2/Acat2/Stard4/Apom/Atp9b/Osbp/Ehd1/Acsl5/Rbp4/Abcc2/Hexa/Abca2/Itgav/Slc27a2/Il1a/Atp9a/Pla2g12a/Plin2/Triap1/Osbpl3/Slco1b2/Slc27a5/Nucb2/Slco2b1/Dgat2/Aqp8/Lamtor1/Acsl4/Abcd1/Atp11a/Got2/Slc27a1/Agt/Apoa5/Ldlr/Li…	105
BP	GO:0031667	response to nutrient levels	85/4218	243/20432	1.35088e-07	1.04731e-05	Comt/Pparg/Akt1/Angptl4/Eif2ak4/Tbl2/Slc38a3/Fads1/Cad/Ehmt2/Nfe2l2/Ada/Pdk4/Nprl3/Cpeb4/Srebf1/Snw1/Ppara/Srebf2/Plec/Arsa/Snai2/Cdkn1a/Slc22a3/Clic5/Pim1/Eif2ak2/Dsc2/Rptor/Rb1cc1/Stat1/Gpr39/Glul/Gatm/Pdia3/Mkks/Ahcy/Map1lc3a/Postn/Bche/Eif2a/Ntrk1/Alad/Mtor/Eif2b1/Aacs/Ulk1/Gabarapl1/Atg7/Nucb2/Rrp8/Serpina7/Gas6/Adrb3/Eif2ak3/Bbs2/Map1lc3b/Gabarapl2/Kank2/Slc16a1/Dpyd/Agl/Becn1/Fnip1/Sh3glb1…	85
BP	GO:0006641	triglyceride metabolic process	41/4218	91/20432	1.36428e-07	1.04731e-05	Apoh/Lmf1/Apoc2/Lipe/Insig2/Cav1/Plin5/Lpl/Ctdnep1/Acsl1/Acsl6/Srebf1/Gpld1/Rgn/Cpt1a/Acsl5/Gk/Cyp2e1/Dbi/Lpin3/Agpat9/Slc27a5/Dgat2/Fgf21/Acsl4/Apoa5/Ldlr/Lipc/Thrsp/Scd1/Scarb1/Serpina12/Pnpla3/Pcsk9/Insig1/Apof/Fitm2/Mogat2/Ces1g/Nr1h2/Gpx1	41
BP	GO:0006638	neutral lipid metabolic process	46/4218	107/20432	1.36695e-07	1.04731e-05	Apoh/Lmf1/Apoc2/Lipe/Insig2/Cav1/Plin5/Mogat1/Lpl/Ctdnep1/Acsl1/Acsl6/Srebf1/Gpld1/Plpp1/Rgn/Cpt1a/Acsl5/Gk/Cyp2e1/Dbi/Lpin3/Agpat9/Slc27a5/Dgat2/Fgf21/Acsl4/Apoa5/Ldlr/Lipc/Dgkh/Thrsp/Scd1/Scarb1/Abhd2/Serpina12/Pnpla3/Pcsk9/Insig1/Apof/Fitm2/Mogat2/Ces1d/Ces1g/Nr1h2/Gpx1	46
BP	GO:0009991	response to extracellular stimulus	92/4218	269/20432	1.38835e-07	1.04933e-05	Comt/Pparg/Akt1/Angptl4/Eif2ak4/Tbl2/Slc38a3/Fads1/Cad/Ehmt2/Nfe2l2/Ada/Pdk4/Nprl3/Cpeb4/Srebf1/Snw1/Fos/Ppara/Srebf2/Plec/Gsdmd/Arsa/Snai2/Cdkn1a/Noct/Slc22a3/Clic5/Pim1/Eif2ak2/Dsc2/Rptor/Rb1cc1/Stat1/Gpr39/Glul/Nr4a2/Gatm/Pdia3/Mkks/Ahcy/Map1lc3a/Postn/Bche/Eif2a/Ntrk1/Alad/Mtor/Eif2b1/Aacs/Ulk1/Gabarapl1/Atg7/Nucb2/Rrp8/Serpina7/Gas6/Adrb3/Eif2ak3/Bbs2/Map1lc3b/Gabarapl2/Kank2/Slc16a1/Dpyd/Ag…	92
BP	GO:0046890	regulation of lipid biosynthetic process	57/4218	144/20432	1.51839e-07	1.13231e-05	Akt1/Apoc2/Cyp17a1/Insig2/Fgfr4/Cdk4/Mid1ip1/Plin5/Ctdnep1/Acadvl/Pdk4/Igf1/Avpr1a/Acsl6/Srebf1/Gpld1/Snai2/Rgn/Stard4/Pcx/Sf1/Acsl5/Pdgfa/Idh1/Acadl/Dbi/Slc45a3/Bmp2/Il1a/Cyp7a1/Mtor/Atg7/Dgat2/Dkk3/Slc27a1/Smpd3/Agt/Apoa5/Bmp5/Ldlr/Hsd17b13/Thrsp/Igfbp7/Fgf1/Scarb1/Ormdl3/Bmp6/Serpina12/Tspo/Pla2g6/Insig1/Fitm2/Adgrf5/Dhcr7/Fdps/Nr1h2/Mup1	57
BP	GO:0009144	purine nucleoside triphosphate metabolic process	77/4218	215/20432	1.72966e-07	1.27289e-05	Cox5a/Atp5f1/Hk2/Tcirg1/Atp5d/Ier3/Atp6v1b2/Rhoa/Slc25a13/Mocs2/Hspa8/Aldoc/Ada/Atp5g3/Atp6v0a1/Igf1/Guk1/Galk1/Ndufs6/Ppif/Pnp/Ndufb9/Ppara/Park2/Ndufaf7/Cox7a2l/Bad/Ndufb8/Atp5b/Atp5c1/Ndufa10/Parp1/Atp1b1/Samhd1/Ampd2/Aldob/Vcp/Gale/Ak2/Park7/Slc25a33/Gbas/Coq7/Cox4i1/Nme6/Nudt15/Gadd45gip1/Tkfc/Cox8a/Galt/Gpi1/Atp5l/Pklr/Tspo/Ndufa7/Pid1/Slc25a23/Tefm/Eno4/Bdnf/Chchd10/Atp5k/Gapdh/Fxn/Uqcr10/…	77
BP	GO:0034655	nucleobase-containing compound catabolic process	80/4218	226/20432	1.7682e-07	1.28436e-05	Snd1/Bax/Pan2/Dhx34/Cnp/Lsm2/Khsrp/Skiv2l2/Exosc10/Ada/Smpdl3a/Enpp3/Nudt4/Supv3l1/Hint1/Mgat1/Rack1/Igfbp3/Pnpt1/Nbas/Pnp/Drosha/Pop1/Eif3e/Pycrl/Ncbp2/Rgn/Noct/Lrpprc/Mtpap/Etf1/Dcp2/Dnase1l3/Exosc7/Upp2/Dut/Adal/Ahcy/Samhd1/Exosc8/Dnase2b/Vcp/Pde4b/Pnrc2/Cda/Dffa/Nudt9/Zc3hav1/Lsm6/Nudt7/Dcps/Nt5e/Mlh1/Dpyd/Nudt15/Galt/Aifm1/Lsm1/Enpp1/Aspdh/Isg20/Cpeb3/Zc3h12d/Dxo/Dnph1/Pde9a/Dcp1b/Ago1/Papd4…	80
BP	GO:1901615	organic hydroxy compound metabolic process	115/4218	358/20432	1.91996e-07	1.37671e-05	Comt/Cyp51/Ddt/Lmf1/Pon1/Lipe/Insig2/Fgfr4/Mvd/Aldh3a2/Dhdds/Mogat1/Pten/Abca1/Plcg1/Cyb5r3/Acadvl/Fdxr/Nudt4/Ddc/Srebf1/Galk1/Sptlc2/Npc2/0610007P14Rik/Fdft1/Hmgcr/Plpp1/Ebpl/Ephx2/Dhrs4/Sqle/Srebf2/Ly6e/Snai2/App/Synj2/Park2/Cyp39a1/Impa2/Fech/Lipa/Chka/Rbp4/Gk/Got1/Acadl/Pnkd/Pecr/Hsd17b7/Dpm2/Nr4a2/Abca2/Bmp2/Impa1/Hmgcs2/Pmvk/Cyp7a1/Park7/Sult1d1/Akr1b8/Atp2b2/Sult1a1/Dgat2/Dkk3/Ebp/Nsdhl/Fg…	115
BP	GO:0034660	ncRNA metabolic process	126/4218	403/20432	2.73718e-07	1.93785e-05	Trmt1/Prkra/Emg1/Utp20/Wbscr22/Vars/Gtpbp3/Khsrp/Cars/Trnt1/H2afy/Skiv2l2/Exosc10/Nol11/Qrsl1/Pus10/Pnpt1/Ddx52/1110008L16Rik/Wars/2210016F16Rik/2700060E02Rik/Elp3/Drosha/Pop1/Dgcr8/Mrpl39/Aars2/Lars/Nars/Rps14/Tcof1/Pdcd11/Ints4/Rps24/Exosc7/Imp4/Farsb/Mrpl44/Mterf4/Tfb2m/Eprs/Dars2/Nop10/Nop56/Exosc8/Adar/Tars2/Tex10/Nol6/Rps6/Trit1/Ebna1bp2/Yars/Mtor/Cpsf3l/Sepsecs/Pus1/Ints1/Thumpd3/Pop4/Tars…	126
BP	GO:0009199	ribonucleoside triphosphate metabolic process	75/4218	210/20432	2.82222e-07	1.95617e-05	Cox5a/Atp5f1/Hk2/Tcirg1/Atp5d/Ier3/Atp6v1b2/Rhoa/Cad/Slc25a13/Mocs2/Hspa8/Aldoc/Atp5g3/Atp6v0a1/Igf1/Guk1/Galk1/Ndufs6/Ppif/Pnp/Ndufb9/Ppara/Park2/Ndufaf7/Cox7a2l/Bad/Ndufb8/Atp5b/Atp5c1/Ndufa10/Parp1/Atp1b1/Ampd2/Aldob/Vcp/Gale/Ak2/Park7/Slc25a33/Gbas/Coq7/Cox4i1/Nme6/Gadd45gip1/Tkfc/Cox8a/Galt/Gpi1/Atp5l/Pklr/Tspo/Ndufa7/Pid1/Slc25a23/Tefm/Eno4/Bdnf/Chchd10/Atp5k/Gapdh/Fxn/Uqcr10/Trp53/Pgk1/Imp…	75
BP	GO:0031669	cellular response to nutrient levels	54/4218	136/20432	2.83301e-07	1.95617e-05	Comt/Angptl4/Eif2ak4/Tbl2/Slc38a3/Fads1/Ehmt2/Nfe2l2/Pdk4/Nprl3/Cpeb4/Srebf1/Snw1/Srebf2/Snai2/Cdkn1a/Pim1/Eif2ak2/Dsc2/Rptor/Rb1cc1/Glul/Pdia3/Map1lc3a/Postn/Mtor/Ulk1/Gabarapl1/Atg7/Rrp8/Gas6/Eif2ak3/Map1lc3b/Gabarapl2/Kank2/Becn1/Fnip1/Sh3glb1/Klf10/Pdk2/Slc39a5/Mybbp1a/Gcn1l1/Zfyve1/Zc3h12a/Pcsk9/Hrk/Rnf152/Kcnb1/Bhlha15/Trp53/Mup1/Fcor/Nupr1l	54
BP	GO:0006520	cellular amino acid metabolic process	68/4218	185/20432	2.93565e-07	2.00233e-05	Ftcd/Gnmt/Prodh/Mri1/Vars/Cars/Apip/Odc1/Cad/Qrsl1/Pah/Ddc/Adi1/Stat5b/Mthfd1/Wars/Dhfr/Glud1/Pycrl/Mrpl39/Csad/Acy1/Aars2/Lars/Nars/Gldc/Got1/Shmt2/Aasdhppt/Asnsd1/Farsb/Agxt/Glul/Eprs/Dars2/Tars2/Cth/Azin2/Yars/Mthfr/Ppat/Hpd/Aass/Gfpt1/Atg7/Tarsl2/Fah/Got2/Aars/Bckdhb/Nmnat3/Amt/Cdo1/Spr/Gcsh/Uroc1/Lars2/Aspg/Fam206a/Vars2/Baat/Kyat3/Mars/Ddo/Sars2/Mpst/Ggh/Bhmt	68
BP	GO:0009205	purine ribonucleoside triphosphate metabolic process	74/4218	207/20432	3.23319e-07	2.15806e-05	Cox5a/Atp5f1/Hk2/Tcirg1/Atp5d/Ier3/Atp6v1b2/Rhoa/Slc25a13/Mocs2/Hspa8/Aldoc/Atp5g3/Atp6v0a1/Igf1/Guk1/Galk1/Ndufs6/Ppif/Pnp/Ndufb9/Ppara/Park2/Ndufaf7/Cox7a2l/Bad/Ndufb8/Atp5b/Atp5c1/Ndufa10/Parp1/Atp1b1/Ampd2/Aldob/Vcp/Gale/Ak2/Park7/Slc25a33/Gbas/Coq7/Cox4i1/Nme6/Gadd45gip1/Tkfc/Cox8a/Galt/Gpi1/Atp5l/Pklr/Tspo/Ndufa7/Pid1/Slc25a23/Tefm/Eno4/Bdnf/Chchd10/Atp5k/Gapdh/Fxn/Uqcr10/Trp53/Pgk1/Impdh2/…	74
BP	GO:0046034	ATP metabolic process	69/4218	189/20432	3.24114e-07	2.15806e-05	Cox5a/Atp5f1/Hk2/Tcirg1/Atp5d/Ier3/Atp6v1b2/Rhoa/Slc25a13/Hspa8/Aldoc/Atp5g3/Atp6v0a1/Igf1/Guk1/Galk1/Ndufs6/Ppif/Ndufb9/Ppara/Park2/Ndufaf7/Cox7a2l/Bad/Ndufb8/Atp5b/Atp5c1/Ndufa10/Parp1/Atp1b1/Ampd2/Aldob/Vcp/Gale/Ak2/Park7/Slc25a33/Gbas/Coq7/Cox4i1/Gadd45gip1/Tkfc/Cox8a/Galt/Gpi1/Atp5l/Pklr/Tspo/Ndufa7/Pid1/Slc25a23/Tefm/Eno4/Bdnf/Chchd10/Atp5k/Gapdh/Fxn/Uqcr10/Trp53/Pgk1/Ldha/Uqcrh/ND2/ATP6/ND…	69
BP	GO:0016236	macroautophagy	99/4218	300/20432	3.30415e-07	2.17413e-05	Hk2/Snapin/Tcirg1/Hsf2bp/Atg4d/Tmem39a/Fancl/Rab23/Nr2c2/Snrpb2/Ubqln4/Ehmt2/Sqstm1/Phf23/Myh11/Atp6v0a1/Pdk4/Dcn/Psen1/Slc1a4/Pex13/Nprl3/Scfd1/Sptlc2/Hapln1/Bnip3l/Acin1/Fam134b/Mtss1/Ndufb9/Mylk/Chaf1b/Rab12/Park2/Slc22a3/Wac/Atg2a/Pi4k2a/Rnf41/Rb1cc1/Pikfyve/Atp1b1/Snrpb/Vps16/Map1lc3a/Anxa5/Tlr2/Alpk1/Vcp/Mtor/Tbc1d14/Vps33a/Ulk1/Gabarapl1/Atg7/Hdac6/Map1lc3b/Car7/Gabarapl2/Snx14/Atg12/Nup93…	99
BP	GO:0016197	endosomal transport	75/4218	211/20432	3.50249e-07	2.27784e-05	Snapin/Ap1s1/Snx6/Snf8/Evi5/Abca1/Vps53/Ap4m1/Rab32/Vps26a/Rab21/Rab10/Ankfy1/Stx8/Vti1b/Trim27/Kif13a/Zfyve16/E430025E21Rik/Emp2/Rab12/Ehd3/Dpy30/Vps52/Ehd1/Gbf1/Agap2/Pikfyve/Fcgr2b/Rab14/Sdccag3/Lrp2/Vps16/Snx5/Snx16/Lrba/Chmp5/Rgp1/Eps15/Htt/Nsg1/Tbc1d14/Vps33a/Vps29/Coro1a/Flna/Vps35/Trak1/Rab6b/Snx33/Tbc1d10a/Ankrd27/Becn1/Plekhj1/Ap5m1/Gcc2/Sgsm2/Ric1/Lmtk2/Epg5/Vps41/Wipi1/Gprasp1/Fam160a…	75
BP	GO:0019915	lipid storage	31/4218	63/20432	4.11664e-07	2.62293e-05	Pparg/Gm2a/Cav1/Plin5/Lpl/Cry1/Stat5b/Hexb/Fitm1/Ppara/Srebf2/Ehd1/Hexa/Itgav/Plin2/Dgat2/4932438A13Rik/Enpp1/Scarb1/Crp/Abhd4/Acacb/Zc3h12a/Hilpda/Fitm2/Nrip1/Fto/Nr1h2/Cry2/Bscl2/Mup1	31
BP	GO:0042274	ribosomal small subunit biogenesis	32/4218	66/20432	4.12691e-07	2.62293e-05	Emg1/Utp20/Rps25/Rps5/Nol11/Eral1/Rps14/Rps24/Rps6/Mrps11/Lsm6/Rpsa/Noc4l/Utp6/Rps16/Rps21/Tbl3/Rps19/Rps2/Rps8/Rps10/Utp18/Npm1/Rps7/Rps17/Rps15/Nhp2l1/Utp14a/Rps28/Utp3/Utp14b/Rps27	32
BP	GO:0051170	nuclear import	90/4218	268/20432	4.72817e-07	2.97131e-05	Akt1/Emd/Sri/Kpna6/Phb2/Rab23/Tek/Pttg1ip/Dmap1/Hyal2/Faf1/Tnpo3/Chp1/Nol3/Hspa8/Akap1/Igf1/Pbld1/Sptbn1/Slc9a3r1/Ppm1a/Hsp90aa1/Nup153/Bmpr1a/Kpna3/Fgf9/Angpt1/Snai2/Gsk3b/Hcls1/Cdkn1a/Hsp90ab1/Axin1/Bambi/Hdac3/Smad4/Parp1/Rbck1/Pkia/Tlr2/Lmna/Ppp3ca/Txn1/Dyrk2/Prdx1/Mtor/Htt/Ran/Tnfrsf1a/Chp2/Flna/Gas6/Rbpms/Agt/Nup93/Vhl/Ppp3r1/Uaca/Prickle1/Txnip/Nup205/Bmp6/Tlr4/Il18/Nup133/Htatip2/Ddx58/Nu…	90
BP	GO:0010565	regulation of cellular ketone metabolic process	43/4218	101/20432	4.79042e-07	2.97698e-05	Pparg/Akt1/Apoc2/Insig2/Fgfr4/Cav1/Mid1ip1/Plin5/Acadvl/Pdk4/Avpr1a/Srebf1/Ppara/Rgn/Stard4/Cpt1a/Acsl5/Gk/Acadl/Dbi/Slc45a3/Bmp2/Cyp7a1/Mtor/Ncor2/Nucb2/Dgat2/Dkk3/Acsl4/Eif2ak3/Agt/Apoa5/Bmp5/Pdk2/Bmp6/Etfbkmt/Acacb/Prkce/Insig1/Sirt5/Fabp1/Nr1h2/Mlycd	43
BP	GO:0071496	cellular response to external stimulus	67/4218	184/20432	5.3212e-07	3.27049e-05	Comt/Col1a1/Akt1/Angptl4/Aqp1/Cnn2/Eif2ak4/Tbl2/Cav1/Slc38a3/Fads1/Ehmt2/Nfe2l2/Pdk4/Nprl3/Cpeb4/Srebf1/Snw1/Fos/Habp4/Srebf2/Gsdmd/Snai2/Gsk3b/Cdkn1a/Pim1/Eif2ak2/Dsc2/Rptor/Rb1cc1/Glul/Nr4a2/Pdia3/Map1lc3a/Postn/Mtor/Ulk1/Gabarapl1/Atg7/Rrp8/Gas6/Eif2ak3/Map1lc3b/Gabarapl2/Kank2/Becn1/Fnip1/Sh3glb1/Klf10/Pdk2/Bmp6/Slc39a5/Mybbp1a/Gcn1l1/Zfyve1/Zc3h12a/Pcsk9/Hrk/Rnf152/Kcnb1/Bhlha15/Aes/Trp53/Ld…	67
BP	GO:0031668	cellular response to extracellular stimulus	60/4218	160/20432	6.56526e-07	3.99125e-05	Comt/Angptl4/Eif2ak4/Tbl2/Slc38a3/Fads1/Ehmt2/Nfe2l2/Pdk4/Nprl3/Cpeb4/Srebf1/Snw1/Fos/Srebf2/Gsdmd/Snai2/Cdkn1a/Pim1/Eif2ak2/Dsc2/Rptor/Rb1cc1/Glul/Nr4a2/Pdia3/Map1lc3a/Postn/Mtor/Ulk1/Gabarapl1/Atg7/Rrp8/Gas6/Eif2ak3/Map1lc3b/Gabarapl2/Kank2/Becn1/Fnip1/Sh3glb1/Klf10/Pdk2/Bmp6/Slc39a5/Mybbp1a/Gcn1l1/Zfyve1/Zc3h12a/Pcsk9/Hrk/Rnf152/Kcnb1/Bhlha15/Aes/Trp53/Ldha/Mup1/Fcor/Nupr1l	60
BP	GO:0006606	protein import into nucleus	89/4218	267/20432	7.83857e-07	4.61486e-05	Akt1/Emd/Sri/Kpna6/Phb2/Rab23/Tek/Pttg1ip/Dmap1/Hyal2/Faf1/Tnpo3/Chp1/Nol3/Hspa8/Akap1/Igf1/Pbld1/Sptbn1/Slc9a3r1/Ppm1a/Hsp90aa1/Nup153/Bmpr1a/Kpna3/Fgf9/Angpt1/Snai2/Gsk3b/Hcls1/Cdkn1a/Hsp90ab1/Axin1/Bambi/Hdac3/Smad4/Parp1/Rbck1/Pkia/Tlr2/Lmna/Ppp3ca/Txn1/Dyrk2/Prdx1/Mtor/Htt/Ran/Tnfrsf1a/Chp2/Flna/Gas6/Rbpms/Agt/Nup93/Vhl/Ppp3r1/Uaca/Prickle1/Txnip/Nup205/Bmp6/Tlr4/Il18/Nup133/Ddx58/Nup88/Pik3…	89
BP	GO:0044744	protein targeting to nucleus	89/4218	267/20432	7.83857e-07	4.61486e-05	Akt1/Emd/Sri/Kpna6/Phb2/Rab23/Tek/Pttg1ip/Dmap1/Hyal2/Faf1/Tnpo3/Chp1/Nol3/Hspa8/Akap1/Igf1/Pbld1/Sptbn1/Slc9a3r1/Ppm1a/Hsp90aa1/Nup153/Bmpr1a/Kpna3/Fgf9/Angpt1/Snai2/Gsk3b/Hcls1/Cdkn1a/Hsp90ab1/Axin1/Bambi/Hdac3/Smad4/Parp1/Rbck1/Pkia/Tlr2/Lmna/Ppp3ca/Txn1/Dyrk2/Prdx1/Mtor/Htt/Ran/Tnfrsf1a/Chp2/Flna/Gas6/Rbpms/Agt/Nup93/Vhl/Ppp3r1/Uaca/Prickle1/Txnip/Nup205/Bmp6/Tlr4/Il18/Nup133/Ddx58/Nup88/Pik3…	89
BP	GO:1902593	single-organism nuclear import	89/4218	267/20432	7.83857e-07	4.61486e-05	Akt1/Emd/Sri/Kpna6/Phb2/Rab23/Tek/Pttg1ip/Dmap1/Hyal2/Faf1/Tnpo3/Chp1/Nol3/Hspa8/Akap1/Igf1/Pbld1/Sptbn1/Slc9a3r1/Ppm1a/Hsp90aa1/Nup153/Bmpr1a/Kpna3/Fgf9/Angpt1/Snai2/Gsk3b/Hcls1/Cdkn1a/Hsp90ab1/Axin1/Bambi/Hdac3/Smad4/Parp1/Rbck1/Pkia/Tlr2/Lmna/Ppp3ca/Txn1/Dyrk2/Prdx1/Mtor/Htt/Ran/Tnfrsf1a/Chp2/Flna/Gas6/Rbpms/Agt/Nup93/Vhl/Ppp3r1/Uaca/Prickle1/Txnip/Nup205/Bmp6/Tlr4/Il18/Nup133/Ddx58/Nup88/Pik3…	89
BP	GO:0001676	long-chain fatty acid metabolic process	40/4218	93/20432	8.63216e-07	5.02913e-05	Cyp2c29/Lipe/Gstm7/Cyp2a5/Fads1/Cyp2j9/Acsl1/Acsl6/Acot2/Acot3/Ephx2/Cyp4f14/Cpt1a/Cyp2c55/Cyp2c39/Cyp2c44/Cyp2e1/Acadl/Pam/Slc27a2/Slc27a5/Abcd1/Plp1/Slc27a1/Pnpla8/Scd1/Daglb/Elovl6/Cyp2c37/Cyp2g1/Acot4/Cyp2c50/Cyp2a12/Cyp2c70/Qk/Cyp2c54/Acot1/Cyp2a4/Cyp2c68/Cyp2d12	40
BP	GO:0042255	ribosome assembly	27/4218	53/20432	9.50094e-07	5.47822e-05	Rpl10/Rps25/Rps5/Eral1/Mterf3/Rps14/Mterf4/Eif2a/Mrpl20/Rpl6/Mrps11/Rpsa/Efl1/Rpl12/Rps19/Rps2/Ddx28/Rps10/Rpl23a/Rpl5/Rpl11/Rpl3/Rps17/Rps15/Rps28/Rps27/Gm5093	27
BP	GO:0006914	autophagy	137/4218	456/20432	1.03991e-06	5.93492e-05	Hk2/Snapin/Akt1/Tcirg1/Hsf2bp/Atg4d/Tmem39a/Fancl/Rab23/Eif2ak4/Nr2c2/Snrpb2/Ubqln4/Ehmt2/Tmem208/Hspa8/Sqstm1/Lamp2/Phf23/Myh11/Atp6v0a1/Pdk4/Gopc/Dcn/Psen1/Slc1a4/Pex13/Nprl3/Rnf185/Srebf1/Scfd1/Sptlc2/Hapln1/Bnip3l/Acin1/Mtdh/Fam134b/Mtss1/Ndufb9/Srebf2/Arsa/Mylk/Chaf1b/Slc17a9/Rab12/Park2/Slc22a3/Bnip1/Wac/Atg2a/Trim8/Fundc1/Pi4k2a/Rnf41/Rb1cc1/Pikfyve/Atp1b1/Abl1/Snrpb/Vps16/Map1lc3a/Anxa5/D…	137
BP	GO:0046460	neutral lipid biosynthetic process	20/4218	34/20432	1.2703e-06	7.10477e-05	Plin5/Mogat1/Lpl/Ctdnep1/Acsl6/Srebf1/Gpld1/Plpp1/Rgn/Acsl5/Lpin3/Agpat9/Dgat2/Ldlr/Thrsp/Scarb1/Pnpla3/Fitm2/Mogat2/Nr1h2	20
BP	GO:0046463	acylglycerol biosynthetic process	20/4218	34/20432	1.2703e-06	7.10477e-05	Plin5/Mogat1/Lpl/Ctdnep1/Acsl6/Srebf1/Gpld1/Plpp1/Rgn/Acsl5/Lpin3/Agpat9/Dgat2/Ldlr/Thrsp/Scarb1/Pnpla3/Fitm2/Mogat2/Nr1h2	20
BP	GO:0033500	carbohydrate homeostasis	73/4218	210/20432	1.30968e-06	7.18142e-05	Pparg/Hk2/Akt1/Sri/Cacna1e/G6pc2/Fgfr4/Kif5b/Gprc5b/Met/Mcu/Slc2a4/Pdk4/Cry1/Igf1/Rack1/Stxbp4/Rph3al/Pygl/Gpld1/Hmgcr/Park2/Bad/Rbp4/Gk/Aspscr1/Map4k4/Gpr39/Adipor1/Mpc2/Pax6/Ppp3ca/Cyp7a1/Rps6/Ncor2/Aacs/Adipor2/Atg7/Nox4/Stx4a/Gas6/Sesn3/Smarca4/Slc8b1/Cyb5r4/Slc16a1/Adra2a/Pim3/Gpi1/Mbd5/Pdk2/Wfs1/Ncoa5/Pik3r1/Sin3a/Pla2g6/Prkce/Gpr68/Foxo3/Adra1b/Kcnb1/Jagn1/Cacna1c/Bhlha15/Adgrf5/Lepr/Prcp/…	73
BP	GO:0042593	glucose homeostasis	73/4218	210/20432	1.30968e-06	7.18142e-05	Pparg/Hk2/Akt1/Sri/Cacna1e/G6pc2/Fgfr4/Kif5b/Gprc5b/Met/Mcu/Slc2a4/Pdk4/Cry1/Igf1/Rack1/Stxbp4/Rph3al/Pygl/Gpld1/Hmgcr/Park2/Bad/Rbp4/Gk/Aspscr1/Map4k4/Gpr39/Adipor1/Mpc2/Pax6/Ppp3ca/Cyp7a1/Rps6/Ncor2/Aacs/Adipor2/Atg7/Nox4/Stx4a/Gas6/Sesn3/Smarca4/Slc8b1/Cyb5r4/Slc16a1/Adra2a/Pim3/Gpi1/Mbd5/Pdk2/Wfs1/Ncoa5/Pik3r1/Sin3a/Pla2g6/Prkce/Gpr68/Foxo3/Adra1b/Kcnb1/Jagn1/Cacna1c/Bhlha15/Adgrf5/Lepr/Prcp/…	73
BP	GO:0043623	cellular protein complex assembly	142/4218	478/20432	1.33712e-06	7.26067e-05	Tcirg1/Med25/Cdkn1b/Calr/Tfam/Clint1/Cyba/Cav1/Rhoa/Mid1ip1/Ap1b1/Capza2/Eps8/Pfn1/Dnah1/Atp6v0a1/Fbxo5/Wasf1/Sgk1/Cand1/Actr2/Cobl/Sptbn1/Rtn4/Pecam1/Ppm1a/Hsp90aa1/Trim27/Carmil1/Exoc2/Nup153/Rasa1/Jmy/Angpt1/Mtss1/Maf1/Hcls1/Cox14/Atf1/Park2/Aars2/Eif2ak2/Ndufaf7/Axin1/Cox7a2l/Pfdn6/Smad4/Timm21/Baiap2/Tubgcp2/Tmem70/Sept2/Ahctf1/Parp1/Abl1/Psmd5/Tmem141/Ttc17/Mkks/Snap23/Vps16/Acad9/Pdgfc/Ald…	142
BP	GO:0006637	acyl-CoA metabolic process	32/4218	69/20432	1.43959e-06	7.66822e-05	Cs/Mvd/Acot8/Pdk4/Acaca/Acly/Acot2/Acot3/Acot12/Oxsm/Sucla2/Ehhadh/Fasn/Mpc2/Acss2/Pmvk/Tdo2/Hmgcl/Dgat2/Nudt7/Acot11/Pdk2/Baat/Mvk/Acacb/Acot4/Suclg1/Ces1d/Acnat2/Acnat1/Acot1/Mlycd	32
BP	GO:0035383	thioester metabolic process	32/4218	69/20432	1.43959e-06	7.66822e-05	Cs/Mvd/Acot8/Pdk4/Acaca/Acly/Acot2/Acot3/Acot12/Oxsm/Sucla2/Ehhadh/Fasn/Mpc2/Acss2/Pmvk/Tdo2/Hmgcl/Dgat2/Nudt7/Acot11/Pdk2/Baat/Mvk/Acacb/Acot4/Suclg1/Ces1d/Acnat2/Acnat1/Acot1/Mlycd	32
BP	GO:1900180	regulation of protein localization to nucleus	73/4218	211/20432	1.60218e-06	8.45376e-05	Cav2/Akt1/Emd/Sri/Rab23/Tek/Cct4/Dmap1/Hyal2/Faf1/Chp1/Nol3/Akap1/Cdk5rap3/Fyn/Igf1/Pbld1/Slc9a3r1/Ppm1a/Hsp90aa1/Tert/Bmpr1a/Cct5/Angpt1/Snai2/Gsk3b/Hcls1/Cdkn1a/Hsp90ab1/Axin1/Bambi/Hdac3/Smad4/Trim8/Cct8/Parp1/Rbck1/Pkia/Tlr2/Lmna/Ppp3ca/Txn1/Dyrk2/Prdx1/Park7/Mtor/Tnfrsf1a/Chp2/Flna/Gas6/Rbpms/Eif2ak3/Pin1/Dclk3/Nup93/Ppp3r1/Uaca/Bmp6/Tlr4/Il18/Ddx58/Pik3r1/Sin3a/Zc3h12a/Tlr7/Mapk14/Npm1/Erbb…	73
BP	GO:0042594	response to starvation	49/4218	126/20432	2.01394e-06	0.000105271	Comt/Angptl4/Eif2ak4/Tbl2/Slc38a3/Fads1/Cad/Ehmt2/Nfe2l2/Pdk4/Nprl3/Cpeb4/Srebf1/Srebf2/Cdkn1a/Eif2ak2/Dsc2/Rb1cc1/Glul/Map1lc3a/Eif2a/Eif2b1/Ulk1/Gabarapl1/Atg7/Rrp8/Gas6/Eif2ak3/Map1lc3b/Gabarapl2/Becn1/Fnip1/Sh3glb1/Klf10/Slc39a5/Mybbp1a/Gcn1l1/Zfyve1/Zc3h12a/Pcsk9/Hrk/Rnf152/Bhlha15/Bcas3/Trp53/Acadm/Mup1/Fcor/Nupr1l	49
BP	GO:0009267	cellular response to starvation	44/4218	109/20432	2.05022e-06	0.000106175	Comt/Angptl4/Eif2ak4/Tbl2/Slc38a3/Fads1/Ehmt2/Nfe2l2/Pdk4/Nprl3/Cpeb4/Srebf1/Srebf2/Cdkn1a/Eif2ak2/Dsc2/Rb1cc1/Glul/Map1lc3a/Ulk1/Gabarapl1/Atg7/Rrp8/Gas6/Eif2ak3/Map1lc3b/Gabarapl2/Becn1/Fnip1/Sh3glb1/Klf10/Slc39a5/Mybbp1a/Gcn1l1/Zfyve1/Zc3h12a/Pcsk9/Hrk/Rnf152/Bhlha15/Trp53/Mup1/Fcor/Nupr1l	44
BP	GO:0043161	proteasome-mediated ubiquitin-dependent protein catabolic process	101/4218	319/20432	2.15975e-06	0.000110821	Rmnd5b/Fbxo9/Akt1/Sdf2/Psmc3/Rmnd5a/Btbd2/Rad23a/Jkamp/Crbn/Rnf114/Ubqln4/Derl3/Ube2g2/Ppp2cb/Faf1/Nfe2l2/Ube2a/Ppp2r5c/Derl2/Rnf145/Psen1/Hsp90b1/Erlec1/Rack1/Ube2b/Rnf185/Ubxn2a/Rnf144a/Psmc5/Nkd2/Fbxl3/Rnf19a/Sharpin/Gsk3b/Park2/Ubr2/Axin1/Wac/Rnf138/Bag6/Nedd4l/Btbd1/Btrc/Arih1/Tor1a/Rbck1/Fbxw7/Vcp/Ube4b/Park7/Anapc4/Clock/Cul1/Atg7/Psmd8/Otud5/Wwp2/Gclc/Stt3b/Trib1/Abtb2/Rnf125/Ccar2/Pomt2/…	101
BP	GO:0031396	regulation of protein ubiquitination	63/4218	176/20432	2.23313e-06	0.000113545	Paxip1/Cav1/Pttg1ip/Cdk9/Pten/Chp1/Phf23/Cdk5rap3/Fbxo5/Fyn/Psen1/Cry1/Sumo3/Ubxn2a/Nxn/Hsp90aa1/Tbc1d7/Angpt1/Park2/Hsp90ab1/Axin1/Anks1/Ndfip1/Gnl3l/Pdcl3/Abl1/Nmi/Fbxw7/Park7/Mtor/Mad2l2/Limk1/Mad2l1/Atg7/Prmt3/Rps3/Rnf40/Birc3/Dcun1d5/Pin1/Gclc/Trib1/Usp4/Isg15/Prickle1/Topors/Kdm1a/Rnf139/Smurf1/Ube2l3/Wfs1/Stub1/Zer1/Ufl1/Tspo/Prkce/Ndfip2/Fgfr3/Per2/Npm1/Ptk2b/Parp10/Ubxn1	63
BP	GO:0034470	ncRNA processing	96/4218	300/20432	2.28867e-06	0.00011532	Trmt1/Prkra/Emg1/Utp20/Wbscr22/Gtpbp3/Trnt1/Skiv2l2/Exosc10/Nol11/Pus10/Ddx52/1110008L16Rik/2210016F16Rik/2700060E02Rik/Elp3/Drosha/Pop1/Dgcr8/Aars2/Rps14/Pdcd11/Ints4/Rps24/Exosc7/Imp4/Mrpl44/Mterf4/Tfb2m/Nop10/Nop56/Exosc8/Adar/Tex10/Nol6/Rps6/Trit1/Ebna1bp2/Cpsf3l/Pus1/Ints1/Thumpd3/Pop4/Mrps11/Rrp8/Lsm6/Mphosph6/Dus2/Aars/Rpusd4/Imp3/Rpsa/Uba5/Noc4l/Utp6/Ints7/Rps16/Rpl10a/Rps21/Isg20/6430573…	96
BP	GO:0045333	cellular respiration	51/4218	135/20432	3.4174e-06	0.000169299	Cox5a/Sdhd/Tbrg4/Idh3g/Bax/Cs/Slc25a13/Mdh2/Pnpt1/Ndufs6/Sucla2/Ndufb9/Ndufb8/Sirt3/Idh1/Ndufa10/Fh1/Idh3b/Mtfr1/Aco1/Vcp/Park7/Idh2/Coq7/Cox4i1/Nfatc3/Cyp1a2/Chchd4/Cox8a/Cisd1/Ndufv1/Chchd5/Mybbp1a/Ndufa7/Cox10/Slc25a23/Bdnf/Suclg1/Fxn/Uqcr10/Uqcrh/ND1/ND2/COX1/COX3/ND4/ND5/CYTB/ND4L/Bnip3/Mup1	51
BP	GO:0008637	apoptotic mitochondrial changes	42/4218	104/20432	3.42049e-06	0.000169299	Hk2/Akt1/Ier3/Bax/Ppp2cb/Nol3/Bik/Rhot1/Igf1/Aifm2/Ppif/Pnp/Bnip3l/Mpv17l/Gsk3b/Park2/Fas/Bad/Nptx1/Mtch2/Jtb/Lmna/Gclm/Them4/Hgf/Slc35f6/Triap1/Gclc/Ccar2/Aifm1/Sh3glb1/Pla2g6/Rnf7/Bloc1s2/Bak1/Fxn/Trp53/Erbb4/Gpx1/Dap3/Bnip3/Bcl2a1a	42
BP	GO:0007041	lysosomal transport	29/4218	62/20432	3.57842e-06	0.000175562	Snapin/Lamp2/Vps53/Ankfy1/Stx8/Kif13a/Zfyve16/Rab12/Ehd3/Vps52/Vps16/Snx16/Chmp5/Scarb2/Vps33a/Tmem106b/Vps35/Trak1/Gcc2/Vps41/Gprasp1/Pcsk9/Fam160a2/Sorl1/Hook2/Chmp3/Rhob/Sort1/Scyl2	29
BP	GO:0006644	phospholipid metabolic process	93/4218	292/20432	4.07402e-06	0.000198139	Ocrl/Apoc2/Lpcat3/Gata6/Smpd4/Tek/Mvd/Vav2/Pla2g12b/Pigyl/Pten/Plcg1/Serinc3/Smpdl3a/Acsl6/Efr3b/Sptlc2/Fdft1/Gpld1/Lpcat1/Hexb/Plpp1/Mtmr6/Fitm1/Chkb/Pigp/Pigx/Synj2/Pigf/Impa2/Chka/Pcx/Acsl5/Pcyt2/Pi4k2a/Pdgfa/Pikfyve/Idh1/Pigc/Dpm2/Gpcpd1/Crls1/Impa1/Pmvk/Pla2g12a/Pip5k1a/Pigo/Pik3r3/Pdgfra/Agpat9/Pik3c2g/Tamm41/Cdipt/Pgap2/Slc27a1/Pla2g15/Smpd3/Lipc/Pik3cb/Ip6k2/Agpat1/Lcat/Tmem55b/Pnpla8/Sh3…	93
BP	GO:0006364	rRNA processing	60/4218	168/20432	4.18206e-06	0.000200671	Emg1/Utp20/Wbscr22/Skiv2l2/Exosc10/Nol11/Ddx52/Rps14/Pdcd11/Rps24/Exosc7/Imp4/Mterf4/Tfb2m/Nop10/Nop56/Exosc8/Tex10/Nol6/Rps6/Ebna1bp2/Pop4/Mrps11/Rrp8/Lsm6/Mphosph6/Imp3/Rpsa/Noc4l/Utp6/Rps16/Rpl10a/Rps21/Isg20/Tbl3/Rps19/Rrp9/Utp15/Rpl7/Rps8/Dis3l2/Utp18/Mettl15/Rrp1b/Rpl5/Rpl11/Rpl35a/Nsa2/Rpl26/Rps7/Rps17/Rpl7a/Rpl35/Rps15/Nhp2l1/Utp14a/Rpl7l1/Rps28/Utp3/Utp14b	60
BP	GO:0019217	regulation of fatty acid metabolic process	33/4218	75/20432	4.19783e-06	0.000200671	Pparg/Akt1/Apoc2/Insig2/Cav1/Mid1ip1/Plin5/Acadvl/Pdk4/Avpr1a/Srebf1/Ppara/Rgn/Cpt1a/Acsl5/Gk/Acadl/Dbi/Slc45a3/Mtor/Nucb2/Dgat2/Acsl4/Eif2ak3/Agt/Apoa5/Pdk2/Etfbkmt/Acacb/Insig1/Fabp1/Nr1h2/Mlycd	33
BP	GO:0043542	endothelial cell migration	54/4218	147/20432	4.77532e-06	0.000226342	Apoh/Serpinf1/Akt1/Paxip1/Hspb1/Tek/Rhoa/Met/Pten/Nfe2l2/Stard13/Plcg1/Dcn/Pecam1/Gpld1/Pdcd6/Angpt1/Myh9/Emp2/Snai2/Hrg/Robo1/Cxcl13/Pdpk1/Csnk2b/Itgb1/Itgav/Pdcd10/Sema4a/Fbxw7/Sh3bgrl3/Anxa3/Ephb4/Fgfr1/Agt/Ets1/Vhl/Fgf1/Atoh8/Scarb1/Thbs1/Prkd2/Zc3h12a/Lemd3/Prkca/Rhob/Bcas3/Ptk2b/Prcp/Itgb1bp1/Kdr/Gpx1/Gdf2/Ccr5	54
BP	GO:0006694	steroid biosynthetic process	51/4218	137/20432	5.59117e-06	0.000259793	Cyp51/Cyp17a1/Insig2/Fgfr4/Mvd/Hsd11b1/Cyb5r3/Igf1/Srebf1/0610007P14Rik/Fdft1/Srd5a1/Hmgcr/Snai2/Cyp39a1/Cyp21a1/Stard4/Sf1/Hsd17b7/Hsd17b12/Bmp2/Slc27a2/Il1a/Hmgcs2/Pmvk/Cyp7a1/Hsd17b11/Slc27a5/Dkk3/Ebp/Nsdhl/Msmo1/Tecr/Hsd17b2/Sc5d/Apoa5/Bmp5/Lss/Igfbp7/Fgf1/Bmp6/Baat/Tspo/Mvk/Hsd3b7/Insig1/Dhcr7/Fdps/Hsd3b3/Hsd3b2/Hmgcs1	51
BP	GO:0016072	rRNA metabolic process	61/4218	173/20432	5.59763e-06	0.000259793	Emg1/Utp20/Wbscr22/Skiv2l2/Exosc10/Nol11/Ddx52/Drosha/Rps14/Pdcd11/Rps24/Exosc7/Imp4/Mterf4/Tfb2m/Nop10/Nop56/Exosc8/Tex10/Nol6/Rps6/Ebna1bp2/Pop4/Mrps11/Rrp8/Lsm6/Mphosph6/Imp3/Rpsa/Noc4l/Utp6/Rps16/Rpl10a/Rps21/Isg20/Tbl3/Rps19/Rrp9/Utp15/Rpl7/Rps8/Dis3l2/Utp18/Mettl15/Rrp1b/Rpl5/Rpl11/Rpl35a/Nsa2/Rpl26/Rps7/Rps17/Rpl7a/Rpl35/Rps15/Nhp2l1/Utp14a/Rpl7l1/Rps28/Utp3/Utp14b	61
BP	GO:0019432	triglyceride biosynthetic process	18/4218	31/20432	5.6204e-06	0.000259793	Plin5/Lpl/Ctdnep1/Acsl6/Srebf1/Gpld1/Rgn/Acsl5/Lpin3/Agpat9/Dgat2/Ldlr/Thrsp/Scarb1/Pnpla3/Fitm2/Mogat2/Nr1h2	18
BP	GO:0072332	intrinsic apoptotic signaling pathway by p53 class mediator	32/4218	73/20432	6.43316e-06	0.000294923	Bax/Cdip1/Wwox/Pttg1ip/E2f2/Ubb/Perp/Hint1/Snw1/Jmy/Cdkn1a/Park2/Bag6/Ankrd2/Shisa5/Bok/Zfp385b/E2f1/Dyrk2/Triap1/Nupr1/Rrp8/Pgap2/Usp28/Topors/Kdm1a/Pdk2/Mybbp1a/Zmat1/Bcl3/Trp53/Ifi204	32
BP	GO:0006730	one-carbon metabolic process	19/4218	34/20432	6.70109e-06	0.000304709	Gnmt/Fpgs/Mthfd1/Dhfr/Shmt2/Tyms/Car3/Car2/Mthfr/Aldh1l1/Car5b/Car7/Mat1a/Mthfd1l/Car8/Mat2b/Mat2a/Mthfs/Mthfsl	19
BP	GO:0016482	cytosolic transport	45/4218	117/20432	7.27746e-06	0.000328249	Ap1s1/Snx6/Snf8/Evi5/Vps53/Ap4m1/Vps26a/Rab21/Actr2/Ankfy1/Stx8/Vti1b/Trim27/Emp2/Ehd3/Gbf1/Pikfyve/Rab14/Snx5/Snx16/Rgp1/Eps15/Srsf10/Tbc1d14/Vps29/Coro1a/Flna/Vps35/Rab6b/Tbc1d10a/Ankrd27/Plekhj1/Tssc1/Gcc2/Sgsm2/Ric1/Lmtk2/Wipi1/Fam160a2/Sorl1/Hook2/Tgoln1/Tgoln2/Sort1/Rab9	45
BP	GO:0044272	sulfur compound biosynthetic process	34/4218	80/20432	7.6675e-06	0.000343075	Ggt5/Nfe2l2/Pdk4/Igf1/Acly/Angpt1/Csad/Mpc2/Ahcy/Acss2/Papss1/Gclm/Cth/Slc35d1/Extl1/Eif2ak3/Lipc/Gclc/Cdo1/Chst7/Mat1a/Pdk2/Dse/Ggt6/Acacb/Mat2b/Pxylp1/Hs6st1/Mat2a/Chst13/Ext1/B3gat3/Mpst/Mlycd	34
BP	GO:0006119	oxidative phosphorylation	29/4218	64/20432	7.83006e-06	0.000347568	Cox5a/Rhoa/Ndufs6/Ppif/Ndufb9/Cox7a2l/Ndufb8/Ndufa10/Vcp/Park7/Slc25a33/Gbas/Coq7/Cox4i1/Gadd45gip1/Cox8a/Ndufa7/Slc25a23/Tefm/Bdnf/Chchd10/Fxn/Uqcr10/Uqcrh/ND2/ND4/ND5/CYTB/ND4L	29
BP	GO:0097193	intrinsic apoptotic signaling pathway	87/4218	273/20432	7.98724e-06	0.000350217	Prkra/Ier3/Bax/Cdip1/Wwox/Hspb1/Cav1/Pttg1ip/Nol3/Nfe2l2/Serinc3/E2f2/Ubb/Hdac2/Perp/Hint1/Rack1/Slc9a3r1/Snw1/Jmy/Ppif/Pnp/Prkdc/Snai2/Gsk3b/Cdkn1a/Park2/Bag6/Bad/Ankrd2/Shisa5/Bok/Parp1/Zfp385b/E2f1/Ptpn1/Skil/Pdcd10/Fbxw7/Xpa/Dyrk2/Park7/Triap1/Hsph1/Tnfrsf1a/Nupr1/Rps3/Rrp8/Pgap2/Eif2ak3/Usp28/Nck1/Mlh1/Ccar2/Uaca/Topors/Aifm1/Kdm1a/Vnn1/Pdk2/Wfs1/Mybbp1a/Pik3r1/Ikbke/Selk/Prkca/Rnf7/Plagl2/Z…	87
BP	GO:0035966	response to topologically incorrect protein	42/4218	107/20432	8.01499e-06	0.000350217	Sdf2/Bax/Hspb1/Jkamp/Eif2ak4/Tbl2/Herpud2/Derl3/Nfe2l2/Derl2/Cdk5rap3/Rnf185/Hsp90aa1/Park2/Eif2ak2/Hspa4l/Rhbdd1/Tor1a/Ptpn1/Vcp/Hsph1/Hdac6/Eif2ak3/Aars/Stt3b/Nck1/Pomt2/Creb3l3/Tmem33/Edem2/Creb3l2/Pomt1/Wfs1/Stub1/Thbs1/Pik3r1/Bhlha15/Fbxo6/Bak1/Nck2/Ccnd1/Hspe1	42
BP	GO:0046889	positive regulation of lipid biosynthetic process	33/4218	77/20432	8.37177e-06	0.000362971	Akt1/Apoc2/Cyp17a1/Mid1ip1/Plin5/Ctdnep1/Igf1/Avpr1a/Acsl6/Srebf1/Gpld1/Rgn/Stard4/Pcx/Acsl5/Dbi/Slc45a3/Il1a/Cyp7a1/Mtor/Dgat2/Smpd3/Agt/Apoa5/Ldlr/Hsd17b13/Fgf1/Scarb1/Bmp6/Pla2g6/Adgrf5/Fdps/Nr1h2	33
BP	GO:0000959	mitochondrial RNA metabolic process	17/4218	29/20432	8.60126e-06	0.000370053	Tfam/Supv3l1/Polrmt/Pnpt1/Mterf3/Aars2/Lrpprc/Peo1/Mterf4/Tfb2m/Dars2/Tars2/Slc25a33/Mrpl12/Trmt10c/Tefm/Mterf2	17
BP	GO:1902653	secondary alcohol biosynthetic process	22/4218	43/20432	8.75692e-06	0.000373874	Cyp51/Insig2/Mvd/Cyb5r3/Srebf1/0610007P14Rik/Fdft1/Hmgcr/Hsd17b7/Hmgcs2/Pmvk/Ebp/Nsdhl/Sc5d/Apoa5/Lss/Fgf1/Mvk/Insig1/Dhcr7/Fdps/Hmgcs1	22
BP	GO:0097006	regulation of plasma lipoprotein particle levels	26/4218	55/20432	8.88561e-06	0.000376494	Lmf1/Apoc2/Lpcat3/Abca1/Lpl/Abca5/Gpld1/Gpihbp1/Apom/Fech/Ehd1/Lrpap1/Dgat2/Apoa5/Ldlr/Lipc/Acsl3/Lcat/Scarb1/Crp/Mylip/Pcsk9/Plagl2/Ces1d/Ces1g/Nr1h2	26
BP	GO:0007029	endoplasmic reticulum organization	23/4218	46/20432	9.03105e-06	0.00037978	Cav2/Lman2l/Use1/Rtn4/Rab10/Bnip1/Bag6/Rtn3/Atl3/Get4/Tor1b/Sec16a/Htt/Stx18/Sec61a1/Eif2ak3/Tmem170/Tmem33/Lman1/Tor1aip2/Jagn1/Atl2/Ccdc47	23
BP	GO:0044764	multi-organism cellular process	143/4218	498/20432	9.17303e-06	0.000382871	Cav2/Trim25/Mx1/Il12rb1/Tmem39a/Rad23a/Fancl/Pkn2/Chmp2b/Eif2ak4/Snf8/Cav1/Snrpb2/Rps15a/Hyal2/Ace2/Hspa8/Serinc3/Dhx58/Pfn1/Irf1/Slc22a5/Ddx39b/Pdk4/Pex13/Trim11/Rsad2/Snw1/Traf3/Trim27/Ripk1/Trim35/Bnip3l/Acin1/Mtss1/Mylk/Chaf1b/Ifnar2/Cd4/Park2/Hsp90ab1/Eif2ak2/Tap2/Etf1/Trim26/Pcsk5/Banf1/Pcx/Bad/Trim8/Ifitm3/Stat1/Xpr1/Apcs/Atp1b1/Lcn2/Ifih1/Itgav/Snrpb/Vps16/Zbp1/Samhd1/Zfp639/Anxa5/Adar/Al…	143
BP	GO:0000028	ribosomal small subunit assembly	13/4218	19/20432	9.29554e-06	0.000385024	Rps25/Rps5/Eral1/Rps14/Mrps11/Rpsa/Rps19/Rps2/Rps10/Rps17/Rps15/Rps28/Rps27	13
BP	GO:0090407	organophosphate biosynthetic process	128/4218	437/20432	9.37943e-06	0.000385024	Atp5f1/Haao/Tcirg1/Atp5d/Lpcat3/Aqp1/Mvd/Pigyl/Cad/Slc25a13/Abca1/Mocs2/Plcg1/Ada/Atp5g3/Pank3/Atp6v0a1/Acsl6/Guk1/Rrm2/Sptlc2/Mthfd1/Pygl/Lpcat1/Hexb/Dhfr/Pnp/Tkt/Npr3/Fitm1/Nadk2/Chkb/Umps/Pigp/Pigx/Park2/Pigf/Gnal/Chka/Pcx/Acsl5/Gk/Pcyt2/Pi4k2a/Atp5b/Prps2/Tyms/Atp5c1/Pdgfa/Idh1/Pigc/Dpm2/Dut/Crls1/Gnas/Impa1/Ampd2/Pmvk/Gucy1b3/Papss1/Pip5k1a/Vcp/Pigo/Ppcs/Cap1/Ak2/Nadk/Ppat/Paics/Agpat9/Gbas/…	128
BP	GO:0050821	protein stabilization	45/4218	118/20432	9.43114e-06	0.000385024	Calr/Phb2/Cct4/Pten/Chp1/Lamp2/Nlk/Pfn1/Igf1/Tcf3/Ube2b/Stxbp4/Naa16/Cct5/Stk3/Gpihbp1/Park2/Pim1/Telo2/Bag6/Cdc37l1/Cct8/Atp1b1/Pdcd10/Fbxw7/P3h1/Per3/Park7/Apbb2/Flna/Hcfc1/Ifi30/Usp2/Pin1/Ank2/Wfs1/Pik3r1/Ipo9/A1cf/Npm1/Gapdh/Trp53/Tnip2/Tcp1/Taf9	45
BP	GO:0051701	interaction with host	35/4218	84/20432	9.62926e-06	0.000390264	Cav2/Trim25/Eif2ak4/Cav1/Hyal2/Tusc2/Slc22a5/Fuca2/Tnip1/Trim11/Exoc7/Exoc2/Cd4/Park2/Tap2/Trim26/Bad/Trim8/Ifitm3/Apcs/Itgav/Vps16/Zfp639/Tlr2/Eps15/Zc3hav1/Atg7/Gas6/Mre11a/Tap1/Zc3h12a/Vamp8/Tcp1/Lgals1/Ccr5	35
BP	GO:0016032	viral process	142/4218	495/20432	1.0399e-05	0.000418427	Cav2/Trim25/Mx1/Il12rb1/Tmem39a/Rad23a/Fancl/Pkn2/Chmp2b/Eif2ak4/Snf8/Cav1/Snrpb2/Rps15a/Hyal2/Ace2/Hspa8/Serinc3/Dhx58/Pfn1/Irf1/Ddx39b/Pdk4/Pex13/Trim11/Rsad2/Snw1/Traf3/Trim27/Ripk1/Trim35/Bnip3l/Acin1/Mtss1/Mylk/Chaf1b/Ifnar2/Cd4/Park2/Hsp90ab1/Eif2ak2/Tap2/Etf1/Trim26/Pcsk5/Banf1/Pcx/Bad/Trim8/Ifitm3/Stat1/Xpr1/Apcs/Atp1b1/Lcn2/Ifih1/Itgav/Snrpb/Vps16/Zbp1/Samhd1/Zfp639/Anxa5/Adar/Alpk1/Them…	142
BP	GO:0010631	epithelial cell migration	73/4218	222/20432	1.25816e-05	0.000502633	Apoh/Serpinf1/Itga3/Akt1/Paxip1/Pkn2/Aqp1/Rab11a/Hspb1/Tek/Rhoa/Met/Pten/Nfe2l2/Stard13/Plcg1/Pfn1/Dcn/Pbld1/Wdpcp/Pecam1/Gpld1/Pdcd6/Angpt1/Myh9/Emp2/Snai2/Hrg/Robo1/Cxcl13/Pdpk1/Csnk2b/Itgb1/Epb41l5/Adipor1/Itgav/Pdcd10/Sema4a/Fbxw7/Macf1/Sh3bgrl3/Anxa3/Ephb4/Strap/Hdac6/Fgfr1/Agt/Ets1/Ctsh/Tgfbr2/Nup93/Vhl/Fgf1/Serpine1/Atoh8/Scarb1/Thbs1/Prkd2/Zc3h12a/Prkce/Lemd3/Prkca/Rhob/Bcas3/Ptk2b/Prcp/I…	73
BP	GO:0009636	response to toxic substance	38/4218	95/20432	1.27612e-05	0.000506195	Pon1/Bax/Gstm7/Cnp/Nfe2l2/Ddc/Dhfr/Ephx2/Rgn/Park2/Eif2ak2/Slc23a1/Fas/Abcc2/Lcn2/Nr4a2/Xpa/Prdx1/Park7/Slc30a3/Pon3/Nupr1/Hdac6/Pon2/Abtb2/Ppp1r9a/Gch1/Ephx1/Gstm2/Wapl/Gucy2c/Gjc2/Ercc6/Ces1d/Scn3a/Bak1/Gpx1/Ttpa	38
BP	GO:0046822	regulation of nucleocytoplasmic transport	69/4218	207/20432	1.29247e-05	0.000509069	Emd/Sri/Ier3/Ppp1cc/Rab23/Tek/Dmap1/Hyal2/Faf1/Chp1/Nol3/Akap1/Igf1/Pbld1/Xpo1/Dnajc27/Slc9a3r1/Ppm1a/Hsp90aa1/Nup153/Bmpr1a/Angpt1/Rangap1/Snai2/Gsk3b/Hcls1/Cdkn1a/Hsp90ab1/Axin1/Bambi/Iws1/Hdac3/Smad4/Parp1/Rbck1/Pkia/Tlr2/Ppp3ca/Txn1/Dyrk2/Prdx1/Park7/Mtor/Tnfrsf1a/Chp2/Flna/Gas6/Rbpms/Nup93/Ppp3r1/Chchd4/Thoc5/Uaca/Camk4/Bmp6/Tlr4/Il18/Ddx58/Pik3r1/Zc3h12a/Tlr7/Mapk14/Erbb4/Ei24/Parp10/Nupl1/…	69
BP	GO:0070670	response to interleukin-4	16/4218	27/20432	1.31339e-05	0.000513692	Mcm2/Shpk/Cdk4/Stat5b/Tuba1b/Hsp90ab1/Fasn/Mrc1/Alad/Coro1a/Jak3/Rps2/Nfil3/Rpl3/Impdh2/Rplp0	16
BP	GO:0006839	mitochondrial transport	70/4218	211/20432	1.3453e-05	0.000522518	Hk2/Timm44/Tomm40/Ier3/Bax/Tomm40l/Kif5b/Cnp/Mcu/Timm23/Nol3/Slc25a13/Rhot1/Psen1/Pnpt1/Srebf1/Timm9/Hsp90aa1/Ppif/Micu2/Bnip3l/Ywhaz/Tomm22/Srebf2/Mpv17l/Gsk3b/Slc17a9/Grpel2/Timm21/Bad/Huwe1/Nptx1/Slc25a10/Mterf4/Mpc2/Hnmt/Timm10/Mtch2/Fbxw7/Them4/Slc25a33/Htt/Slc35f6/Cdkl2/Psmd8/Itgax/Timm17b/Ablim3/Slc8b1/Usp36/Chchd4/Slc25a37/Sh3glb1/Ube2l3/Immp1l/Tst/Slc25a23/Timm8a1/Snip1/Plagl2/Bhlha15/Bl…	70
BP	GO:0010594	regulation of endothelial cell migration	42/4218	109/20432	1.37252e-05	0.000524463	Apoh/Serpinf1/Akt1/Hspb1/Tek/Rhoa/Met/Nfe2l2/Stard13/Plcg1/Dcn/Gpld1/Pdcd6/Angpt1/Emp2/Snai2/Hrg/Cxcl13/Pdpk1/Csnk2b/Pdcd10/Sema4a/Fbxw7/Sh3bgrl3/Anxa3/Fgfr1/Agt/Ets1/Fgf1/Atoh8/Thbs1/Prkd2/Zc3h12a/Prkca/Rhob/Bcas3/Ptk2b/Prcp/Itgb1bp1/Kdr/Gdf2/Ccr5	42
BP	GO:0045017	glycerolipid biosynthetic process	42/4218	109/20432	1.37252e-05	0.000524463	Pigyl/Plin5/Mogat1/Lpl/Ctdnep1/Acsl6/Srebf1/Gpld1/Plpp1/Chkb/Pigp/Rgn/Pigx/Pigf/Chka/Acsl5/Pi4k2a/Pdgfa/Pigc/Dpm2/Crls1/Lpin3/Impa1/Pip5k1a/Pigo/Agpat9/Cdipt/Dgat2/Pgap2/Slc27a1/Ldlr/Thrsp/Scarb1/Pigk/Pnpla3/Pla2g6/Fitm2/Mogat2/Cecr5/Chpt1/Nr1h2/Etnk2	42
BP	GO:2000377	regulation of reactive oxygen species metabolic process	56/4218	159/20432	1.37844e-05	0.000524463	Hk2/Akt1/Ier3/Cyba/Cav1/Rhoa/Tusc2/Plin5/Nfe2l2/Aatf/Igf1/Hsp90aa1/Ripk1/Dhfr/Mpv17l/Cdkn1a/Rgn/Park2/Xdh/Rnf41/Sirt3/F2/Tlr2/Park7/Slc25a33/Mtor/Cxcl1/Pon3/Nox4/Gla/Smpd3/Agt/Birc3/Tgfbr2/Dnm2/Becn1/Gadd45a/Gch1/Eef1a1/Crp/Tlr4/Il18/Thbs1/Tspo/Zc3h12a/Pid1/Foxo3/Agtr1a/Mapk14/Sirt5/Ptk2b/Trp53/Prcp/Raet1b/Bnip3/Tlr5	56
BP	GO:0034248	regulation of cellular amide metabolic process	96/4218	312/20432	1.42344e-05	0.000537924	Hnrnpd/Akt1/Taco1/Mov10/Prkra/Calr/Eif2ak4/Eif4g2/Rps9/Cdk4/Rplp1/Rps5/Nfe2l2/Hsd11b1/Ddx39b/Igf1/Eif4ebp2/Mknk2/Cpeb4/Rack1/Mif4gd/Eif5/Drosha/Dgcr8/Ncbp2/Eif4a2/App/Eif2ak2/Lrpprc/Fech/Rps6kb2/Paip1/Cpeb1/Tyms/Eif5b/Mrpl44/Eprs/Caprin1/Fxr1/Eif2a/Adar/Rps3a1/Ppp3ca/Aco1/Eif4g3/Mtor/Sepsecs/Eif2b1/Ncor2/Caprin2/Rps3/Rbm3/Eif2ak3/Smpd3/Nck1/Eefsec/Dapk3/Eef2/Secisbp2l/Paip2/Rnf139/Rara/Ormdl3/Cpe…	96
BP	GO:0006417	regulation of translation	89/4218	285/20432	1.53488e-05	0.000576146	Hnrnpd/Akt1/Taco1/Mov10/Prkra/Calr/Eif2ak4/Eif4g2/Rps9/Cdk4/Rplp1/Rps5/Ddx39b/Igf1/Eif4ebp2/Mknk2/Cpeb4/Rack1/Mif4gd/Eif5/Drosha/Dgcr8/Ncbp2/Eif4a2/App/Eif2ak2/Lrpprc/Fech/Rps6kb2/Paip1/Cpeb1/Tyms/Eif5b/Mrpl44/Eprs/Caprin1/Fxr1/Eif2a/Adar/Rps3a1/Ppp3ca/Aco1/Eif4g3/Mtor/Sepsecs/Eif2b1/Ncor2/Caprin2/Rps3/Rbm3/Eif2ak3/Nck1/Eefsec/Dapk3/Eef2/Secisbp2l/Paip2/Rnf139/Rara/Cpeb3/Zc3h12d/Ythdf2/Thbs1/Ppp1…	89
BP	GO:0009896	positive regulation of catabolic process	79/4218	247/20432	1.76211e-05	0.000655629	Apoh/Akt1/Apoc2/Ier3/Bax/Snf8/Rnf114/Pttg1ip/Plin5/Pten/Psen1/Igf1/Supv3l1/Sumo3/Rack1/Igfbp3/Pnpt1/Rnf144a/Sptlc2/Gpld1/Nkd2/Lpcat1/Rnf19a/Gsk3b/Rgn/Park2/Axin1/Rnf138/Bag6/Ndfip1/Nedd4l/Cpt1a/Acsl5/Arih1/Rhbdd1/Ptpn1/Sh3d19/Fbxw7/Vcp/Zc3hav1/Atg7/Ctsc/Rnf40/Fgf21/Cul4b/Apoa5/Gclc/Trib1/Snx33/Rnf125/Gga1/Adra2a/Nsf/Oaz1/Prickle1/Rnf139/Rnf144b/Mylip/Edem2/Smurf1/Stub1/Cpeb3/Rfwd2/Gtpbp1/Zc3h12a/…	79
BP	GO:0090132	epithelium migration	73/4218	224/20432	1.77745e-05	0.000655629	Apoh/Serpinf1/Itga3/Akt1/Paxip1/Pkn2/Aqp1/Rab11a/Hspb1/Tek/Rhoa/Met/Pten/Nfe2l2/Stard13/Plcg1/Pfn1/Dcn/Pbld1/Wdpcp/Pecam1/Gpld1/Pdcd6/Angpt1/Myh9/Emp2/Snai2/Hrg/Robo1/Cxcl13/Pdpk1/Csnk2b/Itgb1/Epb41l5/Adipor1/Itgav/Pdcd10/Sema4a/Fbxw7/Macf1/Sh3bgrl3/Anxa3/Ephb4/Strap/Hdac6/Fgfr1/Agt/Ets1/Ctsh/Tgfbr2/Nup93/Vhl/Fgf1/Serpine1/Atoh8/Scarb1/Thbs1/Prkd2/Zc3h12a/Prkce/Lemd3/Prkca/Rhob/Bcas3/Ptk2b/Prcp/I…	73
BP	GO:0010038	response to metal ion	68/4218	205/20432	1.78179e-05	0.000655629	Pparg/Hnrnpd/Haao/Cdkn1b/Fosb/Aqp1/Cyp2a5/Atp7b/Cdk4/Cav1/Slc41a1/Slc25a13/Krt10/Fos/Gpld1/Pdcd6/Glud1/Ppif/Mylk/Hrg/Xdh/Cuta/Nedd4l/Fas/Abcc2/Nptx1/Slc40a1/Gpr39/Gatm/Il1a/Anxa5/Casp6/Ppp3ca/Aldob/Alad/Aco1/Pef1/Park7/Htt/Slc30a3/Mef2a/Fus/Chp2/Stim1/Nfatc3/Cyp1a2/Rasgrp2/Entpd6/Lcat/Sec31a/Syt1/Clic4/Crp/Bmp6/Alg2/Thbs1/Pklr/Slc25a23/Junb/Slc30a7/Fxn/Alox5ap/B2m/CYTB/Ank3/Ggh/Bnip3/Prnp	68
BP	GO:0072521	purine-containing compound metabolic process	134/4218	467/20432	1.79908e-05	0.000657664	Cox5a/Atp5f1/Hk2/Tcirg1/Atp5d/Ier3/Crot/Aqp1/Atp6v1b2/Rhoa/Slc25a13/Abca1/Mocs2/Hspa8/Aldoc/Ada/Atp5g3/Pank3/Atp6v0a1/Nudt4/Igf1/Gamt/Hint1/Rack1/Guk1/Galk1/Mthfd1/Ndufs6/Hmgcr/Ppif/Pnp/Npr3/Ndufb9/Ppara/Park2/Xdh/Ndufaf7/Cox7a2l/Gnal/Bad/Nt5c2/Ndufb8/Atp5b/Urah/Prps2/Atp5c1/Ndufa10/Parp1/Atp1b1/Adal/Gnas/Ahcy/Samhd1/Ampd2/Gucy1b3/Papss1/Uox/Aldob/Vcp/Pde4b/Ppcs/Cap1/Gale/Ak2/Park7/Slc25a33/Paics…	134
BP	GO:0019693	ribose phosphate metabolic process	127/4218	439/20432	1.93921e-05	0.000704284	Cox5a/Atp5f1/Hk2/Tcirg1/Atp5d/Ier3/Crot/Aqp1/Shpk/Atp6v1b2/Rhoa/Cad/Slc25a13/Abca1/Mocs2/Hspa8/Hsd11b1/Aldoc/Atp5g3/Pank3/Atp6v0a1/Nudt4/Igf1/Hint1/Rack1/Guk1/Galk1/Pygl/Ndufs6/Hmgcr/Ppif/Pnp/Tkt/Npr3/Ndufb9/Ppara/Umps/Park2/Ndufaf7/Cox7a2l/Gnal/Bad/Nt5c2/Ndufb8/Atp5b/Taldo1/Prps2/Atp5c1/Ndufa10/Parp1/Atp1b1/Gnas/Ampd2/Gucy1b3/Papss1/Aldob/Vcp/Pde4b/Ppcs/Cap1/Gale/Ak2/Pgd/Park7/H6pd/Slc25a33/Ppat…	127
BP	GO:0071353	cellular response to interleukin-4	15/4218	25/20432	1.99977e-05	0.000721593	Mcm2/Shpk/Cdk4/Tuba1b/Hsp90ab1/Fasn/Mrc1/Alad/Coro1a/Jak3/Rps2/Nfil3/Rpl3/Impdh2/Rplp0	15
BP	GO:1903320	regulation of protein modification by small protein conjugation or removal	67/4218	202/20432	2.05073e-05	0.000735241	Paxip1/Cav1/Pttg1ip/Cdk9/Pten/Chp1/Phf23/Cdk5rap3/Fbxo5/Fyn/Psen1/Cry1/Hmg20b/Sumo3/Ubxn2a/Nxn/Hsp90aa1/Tbc1d7/Angpt1/Park2/Hsp90ab1/Axin1/Anks1/Ndfip1/Gnl3l/Pdcl3/Abl1/Nmi/Fbxw7/Vcp/Park7/Mtor/Mad2l2/Limk1/Mad2l1/Atg7/Prmt3/Rps3/Rnf40/Birc3/Dcun1d5/Pin1/Gclc/Trib1/Usp4/Isg15/Prickle1/Topors/Kdm1a/Rnf139/Smurf1/Ube2l3/Wfs1/Stub1/Zer1/Ufl1/Tspo/Zc3h12a/Prkce/Ndfip2/Fgfr3/Per2/Npm1/Ptk2b/Parp10/Tan…	67
BP	GO:0006390	transcription from mitochondrial promoter	4218-10-01	13/20432	2.14275e-05	0.000763336	Tfam/Polrmt/Mterf3/Peo1/Mterf4/Tfb2m/Slc25a33/Mrpl12/Tefm/Mterf2	10
BP	GO:0016049	cell growth	136/4218	477/20432	2.19852e-05	0.000764682	Pparg/Acvr1b/Sema6b/Rnd2/Akt1/Hdgfrp2/Cdkn1b/Rab11a/Eif2ak4/Eif4g2/Cyba/Rhoa/Clstn3/Hyal2/Atp6v0e/Sgk2/Derl2/Cxcl16/Ddx39b/Sgk1/Ctgf/Igf1/Supv3l1/Avpr1a/Rab21/Cobl/Rack1/Pttg1/Igfbp3/Rtn4/Bin3/Gsk3b/Hrg/App/Cdkn1a/Park2/Smad4/Nedd4l/Smarca2/Sema4g/Ptprj/Aatk/Rptor/Itgb1/Sgk3/Nrp2/Raph1/Serpine2/Cdc73/Epb41l5/Adipor1/Abl1/Itgav/F2/Zfp639/Postn/Il6ra/Sema4a/Cth/Epha7/Cdkn2c/P3h1/Cda/Slc25a33/Mtor/M…	136
BP	GO:0010611	regulation of cardiac muscle hypertrophy	23/4218	48/20432	2.20192e-05	0.000764682	Cdk9/Akap1/Ddx39b/Igf1/Fbxo32/Gsk3b/Smad4/Parp1/Ppp3ca/Errfi1/Mtor/Mef2a/Glrx3/Agt/Pin1/Hand2/Jarid2/Pde9a/Prkca/Pde5a/Ece1/Fdps/Akap13	23
BP	GO:0016126	sterol biosynthetic process	23/4218	48/20432	2.20192e-05	0.000764682	Cyp51/Insig2/Mvd/Cyb5r3/Srebf1/0610007P14Rik/Fdft1/Hmgcr/Hsd17b7/Hmgcs2/Pmvk/Ebp/Nsdhl/Msmo1/Sc5d/Apoa5/Lss/Fgf1/Mvk/Insig1/Dhcr7/Fdps/Hmgcs1	23
BP	GO:0006695	cholesterol biosynthetic process	21/4218	42/20432	2.20555e-05	0.000764682	Cyp51/Insig2/Mvd/Cyb5r3/Srebf1/Fdft1/Hmgcr/Hsd17b7/Hmgcs2/Pmvk/Ebp/Nsdhl/Sc5d/Apoa5/Lss/Fgf1/Mvk/Insig1/Dhcr7/Fdps/Hmgcs1	21
BP	GO:0055088	lipid homeostasis	46/4218	125/20432	2.21488e-05	0.000764682	Angptl4/Apoc2/Fgfr4/Cav1/Pla2g12b/Abca1/Lpl/Acadvl/Acaca/Npc2/Ephx2/Srebf2/Gpihbp1/Ehd1/Got1/Acadl/Gpr39/Acad9/Ampd2/Cyp7a1/Acox3/Acad10/Acads/Atg7/Dgat2/Lamtor1/Acad8/Apoa5/Ldlr/Lipc/Etfa/Lcat/Mia2/Sec24a/Tmem97/Scarb1/Ormdl3/Mylip/Pnpla3/Abcb4/Pcsk9/Angptl8/Fitm2/Nr1h2/Acadm/Acad11	46
BP	GO:0010632	regulation of epithelial cell migration	58/4218	169/20432	2.35613e-05	0.000808456	Apoh/Serpinf1/Itga3/Akt1/Aqp1/Rab11a/Hspb1/Tek/Rhoa/Met/Nfe2l2/Stard13/Plcg1/Pfn1/Dcn/Pbld1/Gpld1/Pdcd6/Angpt1/Emp2/Snai2/Hrg/Cxcl13/Pdpk1/Csnk2b/Epb41l5/Adipor1/Pdcd10/Sema4a/Fbxw7/Macf1/Sh3bgrl3/Anxa3/Strap/Hdac6/Fgfr1/Agt/Ets1/Ctsh/Tgfbr2/Fgf1/Serpine1/Atoh8/Thbs1/Prkd2/Zc3h12a/Prkce/Prkca/Rhob/Bcas3/Ptk2b/Prcp/Itgb1bp1/Kdr/Clasp1/Gdf2/Insl3/Ccr5	58
BP	GO:0090130	tissue migration	73/4218	226/20432	2.4899e-05	0.000849148	Apoh/Serpinf1/Itga3/Akt1/Paxip1/Pkn2/Aqp1/Rab11a/Hspb1/Tek/Rhoa/Met/Pten/Nfe2l2/Stard13/Plcg1/Pfn1/Dcn/Pbld1/Wdpcp/Pecam1/Gpld1/Pdcd6/Angpt1/Myh9/Emp2/Snai2/Hrg/Robo1/Cxcl13/Pdpk1/Csnk2b/Itgb1/Epb41l5/Adipor1/Itgav/Pdcd10/Sema4a/Fbxw7/Macf1/Sh3bgrl3/Anxa3/Ephb4/Strap/Hdac6/Fgfr1/Agt/Ets1/Ctsh/Tgfbr2/Nup93/Vhl/Fgf1/Serpine1/Atoh8/Scarb1/Thbs1/Prkd2/Zc3h12a/Prkce/Lemd3/Prkca/Rhob/Bcas3/Ptk2b/Prcp/I…	73
BP	GO:0009895	negative regulation of catabolic process	50/4218	140/20432	2.54365e-05	0.000862219	Akt1/Ier3/Dhx34/Derl3/Ube2g2/Plin5/Atraid/Derl2/Cdk5rap3/Fyn/Psen1/Erlec1/Nbas/Gpld1/Rgn/Lrpprc/Anks1/Wac/Bag6/Smad4/Agap2/Pdcl3/Serpine2/Dbi/Rgp1/Azin2/Park7/Dffa/Mad2l2/Mad2l1/Flna/Gabarapl2/Pin1/Psmf1/Mycbp2/Ccar2/Adra2a/Ric1/Ptpn3/Etfbkmt/Os9/Acacb/Adora1/Hcar2/Usp14/Adra1b/Trp53/Ubxn1/Bscl2/Taf9	50
BP	GO:0031397	negative regulation of protein ubiquitination	27/4218	61/20432	2.69166e-05	0.000906896	Cav1/Chp1/Fbxo5/Fyn/Psen1/Cry1/Nxn/Anks1/Gnl3l/Pdcl3/Abl1/Park7/Mtor/Mad2l2/Limk1/Mad2l1/Prmt3/Rps3/Gclc/Usp4/Isg15/Ufl1/Tspo/Prkce/Per2/Parp10/Ubxn1	27
BP	GO:0032386	regulation of intracellular transport	127/4218	442/20432	2.74476e-05	0.000916045	Emd/Use1/Sri/Ier3/Ppp1cc/Stxbp2/Rab23/Tek/Kif5b/Derl3/Ube2g2/Dmap1/Hyal2/Faf1/Chp1/Nol3/Akap1/Derl2/Igf1/Pbld1/Rab21/Xpo1/Erlec1/Srebf1/Dnajc27/Slc9a3r1/Scfd1/Ppm1a/Hsp90aa1/Nup153/Bmpr1a/Lcp1/Bnip3l/Angpt1/Rangap1/Srebf2/Snai2/Gsk3b/Hcls1/Cdkn1a/Slc17a9/Hsp90ab1/Pdpk1/Axin1/Bambi/Iws1/Hdac3/Smad4/Huwe1/Rabgef1/Parp1/Abca2/Hnmt/Rbck1/Pkia/Ptpn1/Tlr2/Fbxw7/Ppp3ca/Txn1/Dyrk2/Prdx1/Park7/Mtor/Rint1/…	127
BP	GO:0006733	oxidoreduction coenzyme metabolic process	51/4218	144/20432	2.75157e-05	0.000916045	Hk2/Haao/Idh3g/Ier3/Shpk/Hsd11b1/Aldoc/Fdxr/Mdh2/Igf1/Galk1/Hmgcr/Tkt/Nadk2/Ppara/Nnt/Taldo1/Coq8a/Mpc2/Pdss1/Gpd2/Idh3b/Aldob/Vcp/Gale/Pgd/H6pd/Nadk/Ldhb/Idh2/Coq7/Qprt/Nadsyn1/Me1/Nmnat3/Cyb5r4/Tkfc/Galt/Gpi1/Nmrk1/Aspdh/Kmo/Fmo2/Pklr/Ubiad1/Eno4/Rpia/Gapdh/Trp53/Pgk1/Ldha	51
BP	GO:1901605	alpha-amino acid metabolic process	58/4218	170/20432	2.86486e-05	0.000943152	Comt/Haao/Gnmt/Prodh/Mri1/Fpgs/Apip/Cad/Afmid/Pah/Gamt/Adi1/Stat5b/Mthfd1/Dhfr/Glud1/Pycrl/Gldc/Got1/Prdx4/Padi4/Shmt2/Aasdhppt/Asnsd1/Agxt/Glul/Ahcy/Tdo2/Gclm/Cth/Park7/Mthfr/Htt/Ppat/Hpd/Aass/Gfpt1/Nox4/Fah/Ido2/Got2/Gclc/Nmnat3/Amt/Gcsh/Aspg/Fam206a/Kyat1/Baat/Kmo/Kyat3/Sephs2/Thnsl2/Egln2/Ddo/Mpst/Ggh/Bhmt	58
BP	GO:0046320	regulation of fatty acid oxidation	17/4218	31/20432	2.86672e-05	0.000943152	Pparg/Akt1/Plin5/Acadvl/Pdk4/Ppara/Cpt1a/Acsl5/Acadl/Dbi/Mtor/Nucb2/Dgat2/Etfbkmt/Acacb/Fabp1/Mlycd	17
BP	GO:1903362	regulation of cellular protein catabolic process	60/4218	178/20432	3.16752e-05	0.00103602	Akt1/Dlgap1/Rad23a/Rnf114/Ubqln4/Pttg1ip/Atraid/Pten/Cdk5rap3/Ubb/Psen1/Sumo3/Rhbdf1/Rack1/Rnf144a/Nkd2/Psme1/Rnf19a/Gsk3b/Rgn/Park2/Axin1/Anks1/Wac/Rnf138/Bag6/Btrc/Arih1/Pdcl3/Fbxw7/Vcp/Rgp1/Park7/Atg7/Ctsc/Rnf40/Gabarapl2/Gclc/Trib1/Psmf1/Rnf125/Ccar2/Prickle1/Rnf139/Rnf144b/Mylip/Ric1/Smurf1/Stub1/Ufl1/Rfwd2/Pcsk9/Usp14/Zfand2a/Ptk2b/Rnf217/Gpx1/Ddrgk1/Ubxn1/Taf9	60
BP	GO:0006749	glutathione metabolic process	24/4218	52/20432	3.2122e-05	0.00104453	Txnrd3/Eef1e1/Gstm7/Ggt5/Nfe2l2/Oplah/Gsto1/Idh1/Gstm4/Gclm/Cth/Nat8/Hmgn5/Eif2ak3/Gclc/Gstt2/Gstp2/Ggt6/Gstm2/Gstm1/Gpx1/Eef1g/Gsta1/Gpx4	24
BP	GO:0010608	posttranscriptional regulation of gene expression	102/4218	342/20432	3.28287e-05	0.00106072	Hnrnpd/Akt1/Taco1/Mov10/Prkra/Calr/Eif2ak4/Eif4g2/Rps9/Cdk4/Cav1/Rplp1/Rps5/Ddx39b/Igf1/Eif4ebp2/Mknk2/Cpeb4/Rack1/Mif4gd/Zc3h14/Eif5/Tert/Drosha/Dgcr8/Ncbp2/Eif4a2/App/Noct/Eif2ak2/Lrpprc/Fech/Rps6kb2/Paip1/Cpeb1/Tyms/Eif5b/Mrpl44/Epb41l5/Eprs/Caprin1/E2f1/Fxr1/Eif2a/Adar/Rps3a1/Ppp3ca/Aco1/Ybx1/Eif4g3/Mtor/Sepsecs/Eif2b1/Ncor2/Caprin2/Rps3/Rbm3/Eif2ak3/Nck1/Eefsec/Dapk3/Eef2/Secisbp2l/Paip2/Rnf…	102
BP	GO:0072331	signal transduction by p53 class mediator	43/4218	116/20432	3.29995e-05	0.00106072	Eef1e1/Bax/Cdip1/Wwox/Pttg1ip/Cdk5rap3/E2f2/Ubb/Perp/E2f7/Hint1/Snw1/Jmy/Snai2/Cdkn1a/Park2/Bag6/Ankrd2/Shisa5/Bok/Zfp385b/Spred1/E2f1/Dyrk2/Triap1/Ing4/Nupr1/Rrp8/Pgap2/Usp28/Atr/Myo6/Topors/Kdm1a/Pdk2/Mybbp1a/Foxo3/Zmat1/Bcl3/Pla2r1/Npm1/Trp53/Ifi204	43
BP	GO:0034599	cellular response to oxidative stress	66/4218	201/20432	3.36304e-05	0.00107483	Hnrnpd/Prkra/Psap/Aqp1/Hspb1/Met/Nol3/Nfe2l2/Pcgf2/Hdac2/Rack1/Pnpt1/Fut8/Net1/Fos/Ripk1/Glrx/Dhfr/Ppif/Rgn/Park2/Ankrd2/Scly/Parp1/Lcn2/Nr4a2/Abl1/Pdcd10/Fbxw7/Txn1/Prdx1/Hgf/Park7/Pdgfra/Hsph1/Atg7/Coq7/Rps3/Hdac6/Nup93/Chchd4/Uaca/Tbc1d24/Vnn1/Gch1/Pdk2/Thbs1/Gfer/Sin3a/Adprhl2/Zc3h12a/Foxo3/Rnf7/Zfp622/Adnp2/Rhob/Fabp1/Pla2r1/Arntl/Zfp277/Chd6/Fxn/Trp53/Stk24/Gpx1/Bnip3	66
BP	GO:0001667	ameboidal-type cell migration	100/4218	335/20432	3.75344e-05	0.00119278	Apoh/Acvr1b/Serpinf1/Sema6b/Itga3/Akt1/Paxip1/Pkn2/Aqp1/Rab11a/Hspb1/Tek/Rhoa/Met/Hyal2/Pten/Nfe2l2/Stard13/Plcg1/Pfn1/Smurf2/Cenpv/Dcn/Pbld1/Wdpcp/Pecam1/Gpld1/Pdcd6/Ednrb/Angpt1/Myh9/Emp2/Snai2/Hrg/Robo1/Cxcl13/Pdpk1/Csnk2b/Zfand5/Sema4g/Itgb1/Nrp2/Epb41l5/Adipor1/Itga4/Itgav/Pax6/Schip1/Pdcd10/Sema4a/Fbxw7/Pip5k1a/Macf1/Cap1/Sh3bgrl3/Anxa3/Ephb4/Arhgdib/Strap/Mesp2/Hdac6/Arhgap4/Fgfr1/Agt/Ets1…	100
BP	GO:0007249	I-kappaB kinase/NF-kappaB signaling	70/4218	217/20432	3.78916e-05	0.00119485	Trim25/Rhoc/Relb/Tmed4/Hspb1/Rhoa/Gprc5b/Faf1/Nol3/Sqstm1/Irf1/Fyn/Tnip1/Ppm1a/Ripk1/Mtdh/Angpt1/Sharpin/Tfg/Park2/Pdpk1/Ndfip1/Trim8/Btrc/Nfkb2/Shisa5/Stat1/Nek6/Abl1/Slc20a1/Il1a/Rbck1/Tlr2/Cth/Prdx1/Lurap1/Zc3hav1/Zdhhc13/Zfand6/Flna/Nlrx1/Atp2c1/Hacd3/Uaca/Ubd/Trim13/Nfkbid/Tgm2/Tlr4/Il18/Azi2/Saa3/S100a13/Zc3h12a/Tlr7/Prkce/Cxxc5/Snip1/Gja1/Bcl3/Ndfip2/Eef1d/Tnip2/Irak2/Tnfrsf19/Tank/Akap13/…	70
BP	GO:1901658	glycosyl compound catabolic process	15/4218	26/20432	3.82368e-05	0.00119485	Ada/Fuca2/Nudt4/Pnp/Pycrl/Adal/Ahcy/Gba2/Fuca1/Cda/Nudt9/Nudt7/Nt5e/Abhd10/Dpyd	15
BP	GO:0008630	intrinsic apoptotic signaling pathway in response to DNA damage	40/4218	106/20432	3.82403e-05	0.00119485	Ier3/Bax/Cdip1/Snw1/Pnp/Prkdc/Snai2/Cdkn1a/Bag6/Bad/Shisa5/Bok/E2f1/Skil/Xpa/Dyrk2/Triap1/Tnfrsf1a/Nupr1/Rps3/Pgap2/Usp28/Mlh1/Ccar2/Uaca/Topors/Kdm1a/Pik3r1/Ikbke/Bcl3/Ercc6/Bak1/Trp53/Tpt1/Fnip2/Cxcl12/Ei24/Htra2/Ifi204/Bcl2a1a	40
BP	GO:0010639	negative regulation of organelle organization	83/4218	268/20432	4.05583e-05	0.00126024	Tom1l2/Akt1/Ier3/Mid1ip1/Ubqln4/Bmp7/Ehmt2/Nol3/Capza2/Eps8/Pfn1/Phf23/Fbxo5/Sgk1/Igf1/Sptbn1/Pecam1/Scfd1/Carmil1/Tbc1d7/Ppif/Rad1/Mtbp/Cep97/Mpv17l/Lima1/Rps6ka2/Park2/Gnl3l/Rnf41/Xrcc5/Parp1/Mkks/Lmna/Stmn1/Hgf/Slc35f6/Triap1/Mad1l1/Lmod2/Mad2l1/Fkbp4/Coro1a/Hdac6/Arhgap6/Katnb1/Terf2/Chek1/Kank2/Zw10/Tpm1/Nme6/Map4/Arap1/Ppp1r9a/Phldb2/Recql4/Fhod3/Ankrd27/Vat1/Cdk5rap2/Eml2/Wapl/Tspo/2900011…	83
BP	GO:0006084	acetyl-CoA metabolic process	16/4218	29/20432	4.46653e-05	0.00138007	Cs/Mvd/Pdk4/Acaca/Acly/Acot12/Fasn/Mpc2/Acss2/Pmvk/Tdo2/Nudt7/Pdk2/Mvk/Acacb/Mlycd	16
BP	GO:0070301	cellular response to hydrogen peroxide	29/4218	69/20432	4.49082e-05	0.00138007	Psap/Aqp1/Met/Nol3/Nfe2l2/Pcgf2/Hdac2/Rack1/Net1/Ripk1/Glrx/Ppif/Lcn2/Abl1/Pdcd10/Txn1/Hgf/Park7/Hsph1/Rps3/Hdac6/Nup93/Foxo3/Rhob/Fabp1/Zfp277/Fxn/Trp53/Bnip3	29
BP	GO:0010866	regulation of triglyceride biosynthetic process	13/4218	21/20432	4.57799e-05	0.00139916	Plin5/Ctdnep1/Acsl6/Srebf1/Gpld1/Rgn/Acsl5/Dgat2/Ldlr/Thrsp/Scarb1/Fitm2/Nr1h2	13
BP	GO:0044723	single-organism carbohydrate metabolic process	119/4218	414/20432	4.74753e-05	0.0014431	Gm2a/Hk2/Kat2b/Akt1/Gnmt/Ier3/Man1a/Man2b1/G6pc2/Dhdh/Mogat1/Pten/Ppp1cb/Aldoc/C1qtnf1/Slc35b4/Pdk4/Fuca2/Cry1/Igf1/Igfbp3/Galk1/Fut8/Pygl/Gpld1/Hexb/Nln/Ppara/Gbe1/Pmm2/St3gal6/Gsk3b/Rgn/Synj2/Park2/Pcdh12/Impa2/Pcx/Cpt1a/Bad/Rbp4/Gk/Got1/Pfkfb1/Idh1/Slc45a3/Adipor1/Gpd2/Impa1/Fabp5/Aldob/St3gal3/Dyrk2/Gale/Fuca1/Pgd/H6pd/Mtor/Abcg2/Gfpt1/Mogs/Gys2/Idh2/Dgat2/Chst15/Gla/Phka2/B3gnt3/St3gal4/Man2…	119
BP	GO:0014743	regulation of muscle hypertrophy	23/4218	50/20432	4.98624e-05	0.00150746	Cdk9/Akap1/Ddx39b/Igf1/Fbxo32/Gsk3b/Smad4/Parp1/Ppp3ca/Errfi1/Mtor/Mef2a/Glrx3/Agt/Pin1/Hand2/Jarid2/Pde9a/Prkca/Pde5a/Ece1/Fdps/Akap13	23
BP	GO:1900182	positive regulation of protein localization to nucleus	45/4218	125/20432	5.04875e-05	0.00151815	Cav2/Akt1/Tek/Cct4/Dmap1/Hyal2/Cdk5rap3/Fyn/Igf1/Hsp90aa1/Tert/Bmpr1a/Cct5/Hcls1/Hsp90ab1/Bambi/Hdac3/Smad4/Trim8/Cct8/Parp1/Rbck1/Tlr2/Ppp3ca/Park7/Tnfrsf1a/Chp2/Flna/Rbpms/Eif2ak3/Nup93/Ppp3r1/Uaca/Bmp6/Tlr4/Il18/Ddx58/Pik3r1/Zc3h12a/Tlr7/Mapk14/Npm1/Erbb4/Tcp1/Nlrp12	45
BP	GO:0042493	response to drug	70/4218	219/20432	5.2586e-05	0.0015728	Slc22a18/Crot/Gstm3/Aqp1/Atp4a/Gata6/Cdk4/Rhoa/Slc47a1/Ehmt2/Nfe2l2/Slc22a5/Tcf3/Ube2b/Recql5/Srp68/Slc46a1/Abcc3/Fos/Gpld1/Rasa1/Srd5a1/Ywhaz/Cldn1/Mylk/Add3/Abcc2/Hadha/Stat1/Pam/Lcn2/Gnas/Bche/Hadh/Tlr2/Ntrk1/Gclm/Ppp3ca/Alad/Pde4b/Cyp4b1/Cd38/Aacs/Abcg2/Slco1b2/Blm/Serpina7/Gas6/Cyp1a2/Tgfbr2/Abcc4/Dpyd/Myo6/Ppp1r14a/Serpine1/Atp1a3/Inhba/Adra1a/Rnf149/Bdnf/Rap1b/Junb/Mat2a/Gstm1/Trp53/Ei24/K…	70
BP	GO:0036503	ERAD pathway	33/4218	83/20432	5.34224e-05	0.00158932	Trim25/Sdf2/Psmc3/Jkamp/Derl3/Ube2g2/Derl2/Hsp90b1/Erlec1/Rnf185/Psmc5/Bag6/Get4/Rhbdd1/Tor1a/Vcp/Stt3b/Pomt2/Trim13/Rnf139/Edem2/Pomt1/Wfs1/Stub1/Os9/Usp14/AI314180/Rnf103/Ubxn8/Sec61b/Fbxo6/Ubxn1/Ccdc47	33
BP	GO:1901136	carbohydrate derivative catabolic process	41/4218	111/20432	5.46846e-05	0.00161826	Gm2a/Hyal2/Ada/Fuca2/Nudt4/Hint1/Mgat1/Rack1/Hexb/Ngly1/Pnp/Pycrl/Hexa/Dut/Adal/Ahcy/Samhd1/Gba2/Pde4b/Fuca1/Cda/Nudt9/Lyve1/Gla/Nudt7/Nt5e/Stt3b/Abhd10/Dpyd/Nudt15/Gpc1/Neu3/Hpse/Galt/Amdhd2/Edem2/Pde9a/Pde5a/Fbxo6/Chil1/Neu2	41
BP	GO:1903050	regulation of proteolysis involved in cellular protein catabolic process	53/4218	155/20432	5.78673e-05	0.00170343	Akt1/Dlgap1/Rad23a/Rnf114/Ubqln4/Pten/Ubb/Psen1/Sumo3/Rhbdf1/Rack1/Rnf144a/Nkd2/Psme1/Rnf19a/Gsk3b/Rgn/Park2/Axin1/Anks1/Wac/Rnf138/Bag6/Btrc/Arih1/Pdcl3/Fbxw7/Vcp/Park7/Atg7/Ctsc/Rnf40/Gabarapl2/Gclc/Trib1/Psmf1/Rnf125/Ccar2/Prickle1/Rnf139/Rnf144b/Smurf1/Stub1/Ufl1/Rfwd2/Usp14/Zfand2a/Ptk2b/Rnf217/Gpx1/Ddrgk1/Ubxn1/Taf9	53
BP	GO:0007006	mitochondrial membrane organization	32/4218	80/20432	5.99724e-05	0.00175616	Hk2/Ier3/Bax/Mtfp1/Letm1/Cnp/Nol3/Rhot1/Timm9/Hsp90aa1/Ppif/Bnip3l/Tomm22/Mpv17l/Gsk3b/Bad/Timm10/Mtch2/Them4/Htt/Slc35f6/Chchd6/Cox18/Sh3glb1/2410015M20Rik/Chchd3/Bloc1s2/Bak1/Trp53/Plekhf1/Bnip3/Tomm20	32
BP	GO:0007033	vacuole organization	60/4218	182/20432	6.56789e-05	0.00191324	Snapin/Atg4d/Rab23/Rab11a/Chmp2b/Ubqln4/Ehmt2/Abca1/Hspa8/Phf23/Psen1/Nprl3/Scfd1/Hexb/Cln5/Atg2a/Hexa/Mfsd8/Rb1cc1/Pikfyve/Rab14/Vps16/Map1lc3a/Chmp5/Vcp/Tbc1d14/Vps33a/Ulk1/Tmem106b/Gabarapl1/Atg7/Coro1a/Lamtor1/Map1lc3b/Gabarapl2/Cln6/Snx14/Snx33/Atg12/Trappc8/Becn1/Plekhj1/Sh3glb1/Atg101/Snx10/Fig4/Epg5/Ambra1/Vps41/Wipi1/Fam160a2/Emc6/Atg16l2/Tpcn2/Lix1l/Vamp8/Hook2/Fez2/Tecpr1/Plekhf1	60
BP	GO:0042306	regulation of protein import into nucleus	56/4218	167/20432	6.71014e-05	0.00194455	Emd/Sri/Rab23/Tek/Dmap1/Hyal2/Faf1/Chp1/Nol3/Akap1/Igf1/Pbld1/Slc9a3r1/Ppm1a/Hsp90aa1/Bmpr1a/Angpt1/Snai2/Gsk3b/Hcls1/Cdkn1a/Hsp90ab1/Axin1/Bambi/Hdac3/Smad4/Parp1/Rbck1/Pkia/Tlr2/Ppp3ca/Txn1/Dyrk2/Prdx1/Mtor/Tnfrsf1a/Chp2/Flna/Gas6/Rbpms/Nup93/Ppp3r1/Uaca/Bmp6/Tlr4/Il18/Ddx58/Pik3r1/Zc3h12a/Tlr7/Mapk14/Erbb4/Ei24/Parp10/Nupl1/Nlrp12	56
BP	GO:0034614	cellular response to reactive oxygen species	41/4218	112/20432	6.92289e-05	0.00198652	Hnrnpd/Psap/Aqp1/Met/Nol3/Nfe2l2/Pcgf2/Hdac2/Rack1/Net1/Fos/Ripk1/Glrx/Dhfr/Ppif/Rgn/Parp1/Lcn2/Abl1/Pdcd10/Txn1/Prdx1/Hgf/Park7/Pdgfra/Hsph1/Atg7/Rps3/Hdac6/Nup93/Gch1/Pdk2/Thbs1/Adprhl2/Foxo3/Rhob/Fabp1/Zfp277/Fxn/Trp53/Bnip3	41
BP	GO:0050999	regulation of nitric-oxide synthase activity	15/4218	27/20432	6.96153e-05	0.00198652	Akt1/Nosip/Fcer2a/Cav1/Tert/Dhfr/Npr3/Gsk3b/Gla/Terf2/Gch1/Scarb1/Acvr2a/Ptk2b/Cnr2	15
BP	GO:0090208	positive regulation of triglyceride metabolic process	15/4218	27/20432	6.96153e-05	0.00198652	Apoh/Apoc2/Plin5/Ctdnep1/Acsl6/Srebf1/Gpld1/Rgn/Acsl5/Dgat2/Fgf21/Apoa5/Ldlr/Scarb1/Nr1h2	15
BP	GO:0010564	regulation of cell cycle process	130/4218	463/20432	7.0813e-05	0.00201044	Tom1l2/Akt1/Chordc1/Spag5/Paxip1/Med25/Cdkn1b/Ier3/Calr/Phb2/Pkn2/Rab11a/Chmp2b/Ndrg1/Gata6/Susd2/Cdk4/Ppp2r1a/Rhoa/Bmp7/Met/Cdk9/Pten/H2afy/Rab11fip4/Cenpv/Cdk5rap3/Ddx39b/Fbxo5/Ctgf/Cry1/Igf1/E2f7/Xpo1/Ube2b/Hus1/Stxbp4/Ctc1/Tert/Psme1/Rad1/Mtbp/Cep97/Prkdc/App/Cdkn1a/Parp3/Rps6ka2/Brd4/Spast/Ercc3/Prpf19/Uhrf2/Ovol1/Stag2/Cdc73/Nek6/Sdccag3/Il1a/E2f1/Pkia/Fbxw7/Anp32b/Chmp5/Tas1r2/Eif4g3/Rpa2/…	130
BP	GO:0032387	negative regulation of intracellular transport	39/4218	105/20432	7.13557e-05	0.00201562	Emd/Sri/Rab23/Derl3/Ube2g2/Faf1/Chp1/Nol3/Akap1/Derl2/Pbld1/Erlec1/Slc9a3r1/Ppm1a/Nup153/Angpt1/Rangap1/Snai2/Gsk3b/Hdac3/Rabgef1/Pkia/Txn1/Dyrk2/Park7/Mtor/Il13ra2/Gas6/Uaca/Cd300a/Cd84/Os9/Zc3h12a/Insig1/Bst2/Itgb1bp1/Ei24/Parp10/Nlrp12	39
BP	GO:1904950	negative regulation of establishment of protein localization	70/4218	221/20432	7.2369e-05	0.00202407	Vpreb3/Emd/Sri/Rab23/Tmbim1/Derl3/Ube2g2/Faf1/Chp1/Nol3/Akap1/Derl2/Pbld1/Srgn/Rhbdf1/Erlec1/Srebf1/Rsad2/Slc9a3r1/Ppm1a/Trim27/Hmgcr/Angpt1/Rangap1/Snai2/Gsk3b/Park2/Pkdcc/Ndfip1/Hdac3/Rabgef1/Rptor/Lypla1/Map4k4/Parp1/Pkia/Anxa5/Hadh/Ppp3ca/Txn1/Tmem59/Dyrk2/Park7/Mtor/Psmd9/Hsph1/Anxa4/Idh2/Otud5/Gas6/Rab11fip1/Wwp2/Adra2a/Uaca/Pim3/Cd84/Os9/Madd/Zc3h12a/Pid1/Kcnb1/Jagn1/Lrrc15/Ndfip2/Mtnr1a/I…	70
BP	GO:0006986	response to unfolded protein	35/4218	91/20432	7.23786e-05	0.00202407	Bax/Hspb1/Jkamp/Eif2ak4/Tbl2/Herpud2/Derl3/Nfe2l2/Derl2/Cdk5rap3/Hsp90aa1/Park2/Eif2ak2/Hspa4l/Rhbdd1/Ptpn1/Hsph1/Eif2ak3/Aars/Stt3b/Nck1/Creb3l3/Tmem33/Edem2/Creb3l2/Wfs1/Stub1/Thbs1/Pik3r1/Bhlha15/Fbxo6/Bak1/Nck2/Ccnd1/Hspe1	35
BP	GO:0090559	regulation of membrane permeability	23/4218	51/20432	7.31747e-05	0.00203615	Hk2/Ier3/Bax/Cnp/Nol3/Hspa8/Rhot1/Ppif/Bnip3l/Mpv17l/Gsk3b/Bad/Mtch2/Them4/Mtor/Htt/Slc35f6/Sh3glb1/Bloc1s2/Bak1/Trp53/Plekhf1/Bnip3	23
BP	GO:0043534	blood vessel endothelial cell migration	30/4218	74/20432	7.51475e-05	0.00208069	Akt1/Hspb1/Rhoa/Nfe2l2/Stard13/Plcg1/Gpld1/Angpt1/Myh9/Emp2/Hrg/Robo1/Csnk2b/Itgb1/Pdcd10/Fbxw7/Sh3bgrl3/Ephb4/Vhl/Scarb1/Thbs1/Prkd2/Lemd3/Prkca/Ptk2b/Prcp/Itgb1bp1/Kdr/Gpx1/Ccr5	30
BP	GO:0006890	retrograde vesicle-mediated transport, Golgi to ER	16/4218	30/20432	7.73929e-05	0.00213231	Arf5/Nbas/Scfd1/Atp9b/Scyl1/Gbf1/Copa/Atp9a/Htt/Stx18/Ergic2/Cog4/Rab6b/Dnajc28/Arf3/Cope	16
BP	GO:0051259	protein oligomerization	136/4218	489/20432	7.88384e-05	0.00216149	Cav2/Kctd10/Col1a1/Angptl4/Gnmt/Bax/Crbn/Tek/Cav1/Fgfrl1/Kcnd1/Apip/Mlkl/Chp1/Nol3/Sqstm1/Rxrg/Lnx2/Bik/Med24/Aldoc/C1qtnf1/Anxa6/Gopc/Pcbd1/Rack1/Pnpt1/Acaca/Rrm2/Trim27/Ripk1/Hmgcr/Hacl1/Scara5/Chrna2/Dhrs4/Dpys/Angpt1/St13/Cldn1/Sharpin/App/Ehd3/Spast/Axin1/Cuta/Cabyr/Atl3/Ehd1/Fas/Cpt1a/Cutc/Peo1/Shmt2/Tk1/Acadl/Farsb/Pam/Glul/Fh1/Pdss1/Lcn2/Tor1b/Tor1a/P2rx3/Dut/Lrp4/Chrna4/Samhd1/Anxa5/Stxb…	136
BP	GO:0019318	hexose metabolic process	67/4218	210/20432	7.99611e-05	0.00217098	Hk2/Kat2b/Akt1/Gnmt/Man2b1/G6pc2/Ppp1cb/C1qtnf1/Slc35b4/Pdk4/Fuca2/Cry1/Igf1/Igfbp3/Galk1/Gpld1/Nln/Ppara/Pmm2/Rgn/Park2/Pcx/Cpt1a/Bad/Rbp4/Pfkfb1/Slc45a3/Adipor1/Gpd2/Fabp5/Aldob/Dyrk2/Gale/Fuca1/H6pd/Mtor/Gfpt1/Dgat2/Chst15/Man2c1/Tkfc/G6pc3/Galm/Galt/Gpi1/Enpp1/Pdk2/Ppp1ca/Pik3r1/Serpina12/Pgm5/Acacb/Glb1/Angptl8/Adra1b/B3glct/Mapk14/Per2/Gapdh/Lepr/Trp53/Pgk1/Acadm/Ldha/Gdf2/Mlycd/Mup1	67
BP	GO:1903008	organelle disassembly	67/4218	210/20432	7.99611e-05	0.00217098	Hk2/Hsf2bp/Atg4d/Tmem39a/Nr2c2/Kif5b/Sqstm1/Myh11/Slc1a4/Pex13/Srebf1/Vrk1/Hapln1/Bnip3l/Acin1/Fam134b/Ndufb9/Srebf2/Mylk/Chaf1b/Slc17a9/Park2/Slc22a3/Spast/Atg2a/Fundc1/Pi4k2a/Gbf1/Rnf41/Rb1cc1/Atp1b1/Snrpb/Map1lc3a/Anxa5/Alpk1/Fbxw7/Cisd2/Ulk1/Gabarapl1/Atg7/Hdac6/Map1lc3b/Car7/Gabarapl2/Kif9/Atg12/Nup93/Usp36/Becn1/Cox8a/Fam13b/Mbd5/Mex3c/Smurf1/Supt3/Zfp189/Stat2/Ambra1/Prkd2/Tspo/Wipi1/Trem1…	67
BP	GO:0046902	regulation of mitochondrial membrane permeability	21/4218	45/20432	8.10368e-05	0.00218956	Hk2/Ier3/Bax/Cnp/Nol3/Rhot1/Ppif/Bnip3l/Mpv17l/Gsk3b/Bad/Mtch2/Them4/Htt/Slc35f6/Sh3glb1/Bloc1s2/Bak1/Trp53/Plekhf1/Bnip3	21
BP	GO:0006413	translational initiation	38/4218	102/20432	8.14648e-05	0.00219054	Eif2ak4/Eif4g2/Eif4ebp2/Eif5/Eif3h/Eif3e/Ncbp2/Eif4a2/Eif2ak2/Fech/Rps6kb2/Eif5b/Eif3m/Eif2a/Eif2b3/Eif4g3/Eif3i/Eif2b1/Eif3c/Eif3f/Eif2ak3/Nck1/Eif1/Paip2/Rara/Ythdf2/Rps2/Paip2b/Ctif/Pcbp2/Npm1/Eif1a/Eif4b/Nck2/Eif1ax/Polr2g/Rpl13a/Yae1d1	38
BP	GO:0046470	phosphatidylcholine metabolic process	17/4218	33/20432	8.23481e-05	0.0022037	Pon1/Lpcat1/Chkb/Chka/Dbi/Fabp5/Slc27a1/Pla2g15/Apoa5/Ldlr/Lipc/Acsl3/Lcat/Pnpla8/Scarb1/Cept1/Chpt1	17
BP	GO:0019362	pyridine nucleotide metabolic process	46/4218	131/20432	8.42108e-05	0.00224282	Hk2/Haao/Idh3g/Ier3/Shpk/Hsd11b1/Aldoc/Fdxr/Mdh2/Igf1/Galk1/Tkt/Nadk2/Ppara/Nnt/Taldo1/Mpc2/Gpd2/Idh3b/Aldob/Vcp/Gale/Pgd/H6pd/Nadk/Ldhb/Idh2/Qprt/Nadsyn1/Me1/Nmnat3/Cyb5r4/Tkfc/Galt/Gpi1/Nmrk1/Aspdh/Kmo/Fmo2/Pklr/Eno4/Rpia/Gapdh/Trp53/Pgk1/Ldha	46
BP	GO:1901031	regulation of response to reactive oxygen species	19/4218	39/20432	8.50932e-05	0.00225557	Psap/Met/Nol3/Nfe2l2/Rack1/Ripk1/Glrx/Dhfr/Rgn/Txn1/Hgf/Park7/Hsph1/Hdac6/Sesn3/Nup93/Gch1/Foxo3/Trp53	19
BP	GO:0035967	cellular response to topologically incorrect protein	31/4218	78/20432	8.96623e-05	0.00236548	Sdf2/Bax/Eif2ak4/Tbl2/Derl3/Nfe2l2/Derl2/Cdk5rap3/Rnf185/Eif2ak2/Rhbdd1/Tor1a/Ptpn1/Vcp/Hdac6/Eif2ak3/Aars/Nck1/Pomt2/Creb3l3/Tmem33/Edem2/Creb3l2/Pomt1/Wfs1/Stub1/Pik3r1/Bhlha15/Bak1/Nck2/Ccnd1	31
BP	GO:0009649	entrainment of circadian clock	13/4218	22/20432	9.07278e-05	0.00238235	Nr2f6/Ppp1cc/Ppp1cb/Cry1/Fbxl3/Bhlhe40/Bhlhe41/Usp2/Fbxl21/Ppp1ca/Phlpp1/Trp53/Cry2	13
BP	GO:0006575	cellular modified amino acid metabolic process	45/4218	128/20432	9.68299e-05	0.0025298	Txnrd3/Eef1e1/Gstm7/Ggt5/Fpgs/Nfe2l2/Serinc3/Mthfd1/Dhfr/Oplah/Gsto1/Prdx4/Shmt2/Tyms/Idh1/Gstm4/Gclm/Cth/Park7/Mthfr/Nat8/Aldh1l1/Hmgn5/Eif2ak3/Slc27a1/Lipc/Gclc/Gstt2/Gch1/Gstp2/Cpq/Ggt6/Gstm2/Mthfd1l/Reln/Gstm1/Egln2/Gpx1/Mthfs/Eef1g/Ggh/Gsta1/Gpx4/Dio3/Mthfsl	45
BP	GO:0005996	monosaccharide metabolic process	69/4218	219/20432	9.72479e-05	0.0025298	Hk2/Kat2b/Akt1/Gnmt/Man2b1/G6pc2/Dhdh/Ppp1cb/C1qtnf1/Slc35b4/Pdk4/Fuca2/Cry1/Igf1/Igfbp3/Galk1/Gpld1/Nln/Ppara/Pmm2/Rgn/Park2/Pcx/Cpt1a/Bad/Rbp4/Pfkfb1/Slc45a3/Adipor1/Gpd2/Fabp5/Aldob/Dyrk2/Gale/Fuca1/Pgd/H6pd/Mtor/Gfpt1/Dgat2/Chst15/Man2c1/Tkfc/G6pc3/Galm/Galt/Gpi1/Enpp1/Pdk2/Ppp1ca/Pik3r1/Serpina12/Pgm5/Acacb/Glb1/Angptl8/Adra1b/B3glct/Mapk14/Per2/Gapdh/Lepr/Trp53/Pgk1/Acadm/Ldha/Gdf2/Mlycd/Mu…	69
BP	GO:0046322	negative regulation of fatty acid oxidation	4218-08-01	10/20432	9.85736e-05	0.00254066	Akt1/Plin5/Acadvl/Acadl/Dbi/Dgat2/Etfbkmt/Acacb	8
BP	GO:0051292	nuclear pore complex assembly	4218-08-01	10/20432	9.85736e-05	0.00254066	Rtn4/Nup153/Ahctf1/Tmem170/Nup93/Tmem33/Nup205/Nup107	8
BP	GO:0033157	regulation of intracellular protein transport	101/4218	347/20432	0.000101763	0.0026011	Emd/Sri/Rab23/Tek/Kif5b/Derl3/Ube2g2/Dmap1/Hyal2/Faf1/Chp1/Nol3/Akap1/Derl2/Igf1/Pbld1/Xpo1/Erlec1/Srebf1/Dnajc27/Slc9a3r1/Ppm1a/Hsp90aa1/Bmpr1a/Lcp1/Bnip3l/Angpt1/Rangap1/Srebf2/Snai2/Gsk3b/Hcls1/Cdkn1a/Slc17a9/Hsp90ab1/Axin1/Bambi/Hdac3/Smad4/Huwe1/Parp1/Hnmt/Rbck1/Pkia/Ptpn1/Tlr2/Fbxw7/Ppp3ca/Txn1/Dyrk2/Prdx1/Park7/Mtor/Rufy3/Cdkl2/Tnfrsf1a/Psmd8/Itgax/Chp2/Flna/Gas6/Rbpms/Ablim3/Nup93/Usp36/P…	101
BP	GO:0010867	positive regulation of triglyceride biosynthetic process	4218-11-01	17/20432	0.000101849	0.0026011	Plin5/Ctdnep1/Acsl6/Srebf1/Gpld1/Rgn/Acsl5/Dgat2/Ldlr/Scarb1/Nr1h2	11
BP	GO:0043903	regulation of symbiosis, encompassing mutualism through parasitism	94/4218	319/20432	0.000106679	0.0027102	Cav2/Trim25/Il12rb1/Tmem39a/Rad23a/Fancl/Pkn2/Chmp2b/Eif2ak4/Snf8/Cav1/Snrpb2/Hspa8/Sqstm1/Dhx58/Pfn1/Pdk4/Fuca2/Pex13/Trim11/Rsad2/Exoc7/Snw1/Traf3/Trim27/Exoc2/Trim35/Acin1/Mtss1/Mylk/Chaf1b/Park2/Eif2ak2/Tap2/Trim26/Osbp/Pcx/Bad/Trim8/Ifitm3/Stat1/Apcs/Atp1b1/Itgav/Snrpb/Zfp639/Anxa5/Adar/Tlr2/Alpk1/Cxcl1/Zc3hav1/Car7/Mre11a/Nlrx1/Smarca4/Nup93/Hacd3/Traf3ip1/Tkfc/Ifit1/Trim13/Isg15/Cox8a/Fam1…	94
BP	GO:0045862	positive regulation of proteolysis	78/4218	255/20432	0.00010709	0.0027102	Pparg/Akt1/Cdkn1b/Bax/Fgfr4/Rnf114/Rhoa/Fuz/Pten/Hspa8/Plgrkt/Hdac2/Perp/Psen1/Ctgf/Sumo3/Rack1/Rnf144a/Gpld1/Nkd2/Pdcd6/Rnf19a/Myh9/Gsk3b/Robo1/Rgn/Park2/Mtch1/Xdh/Axin1/Rnf138/Fas/Bad/Btrc/Arih1/Stat1/Rhbdd1/Bok/Sh3d19/Fbxw7/F3/Akirin2/Vcp/Atg7/Ctsc/Rps3/Rnf40/Eif2ak3/Cln6/Gclc/Ctsh/Trib1/Snx33/Rnf125/Adra2a/Ctnnd1/Tbc1d10a/Uaca/Prickle1/Aifm1/Rnf139/Rnf144b/Smurf1/Stub1/Rfwd2/Zc3h12a/Angptl8/R…	78
BP	GO:0051260	protein homooligomerization	84/4218	279/20432	0.000109192	0.00275096	Kctd10/Angptl4/Gnmt/Bax/Crbn/Cav1/Fgfrl1/Kcnd1/Apip/Mlkl/Rxrg/Lnx2/Bik/Aldoc/C1qtnf1/Anxa6/Gopc/Pcbd1/Rack1/Pnpt1/Acaca/Ripk1/Scara5/Dpys/Angpt1/St13/Cldn1/Sharpin/App/Ehd3/Spast/Axin1/Cuta/Atl3/Ehd1/Fas/Cpt1a/Peo1/Shmt2/Tk1/Acadl/Pam/Glul/Lcn2/Tor1b/Tor1a/P2rx3/Dut/Samhd1/Anxa5/Cth/Decr1/Alad/Vcp/Cda/Ppat/Acads/Gfpt1/Eif2ak3/Acat1/Hsf4/Brk1/Kctd7/Gch1/Eef1a1/Mat1a/Tgm2/Tmem120a/Kcnj2/Acacb/Ikbke…	84
BP	GO:0031331	positive regulation of cellular catabolic process	61/4218	189/20432	0.000113423	0.00284472	Apoh/Akt1/Apoc2/Bax/Rnf114/Pttg1ip/Plin5/Pten/Psen1/Igf1/Supv3l1/Sumo3/Rack1/Igfbp3/Pnpt1/Rnf144a/Sptlc2/Gpld1/Nkd2/Rnf19a/Gsk3b/Rgn/Park2/Axin1/Rnf138/Cpt1a/Acsl5/Arih1/Ptpn1/Sh3d19/Fbxw7/Vcp/Zc3hav1/Atg7/Ctsc/Rnf40/Fgf21/Apoa5/Gclc/Trib1/Snx33/Rnf125/Adra2a/Prickle1/Rnf139/Rnf144b/Smurf1/Stub1/Cpeb3/Rfwd2/Gtpbp1/Zc3h12a/Pcsk9/Adra1b/Zfand2a/Fabp1/Upf1/Ptk2b/Rnf217/Ddrgk1/Polr2g	61
BP	GO:1904589	regulation of protein import	56/4218	170/20432	0.000115554	0.00288524	Emd/Sri/Rab23/Tek/Dmap1/Hyal2/Faf1/Chp1/Nol3/Akap1/Igf1/Pbld1/Slc9a3r1/Ppm1a/Hsp90aa1/Bmpr1a/Angpt1/Snai2/Gsk3b/Hcls1/Cdkn1a/Hsp90ab1/Axin1/Bambi/Hdac3/Smad4/Parp1/Rbck1/Pkia/Tlr2/Ppp3ca/Txn1/Dyrk2/Prdx1/Mtor/Tnfrsf1a/Chp2/Flna/Gas6/Rbpms/Nup93/Ppp3r1/Uaca/Bmp6/Tlr4/Il18/Ddx58/Pik3r1/Zc3h12a/Tlr7/Mapk14/Erbb4/Ei24/Parp10/Nupl1/Nlrp12	56
BP	GO:0072593	reactive oxygen species metabolic process	72/4218	232/20432	0.000117856	0.00292964	Hk2/Akt1/Ier3/Cyba/Cav1/Rhoa/Met/Tusc2/Plin5/Nfe2l2/Aatf/Noxo1/Pdk4/Ctgf/Igf1/Pxdn/Hsp90aa1/Ripk1/Dhfr/Mpv17l/Cdkn1a/Rgn/Park2/Xdh/Gbf1/Prdx4/Rnf41/Sirt3/F2/Tlr2/Prdx1/Park7/Slc25a33/Mtor/Cxcl1/Pon3/Nox4/Gla/Slc7a2/Smpd3/Agt/Birc3/Cyp1a2/Tgfbr2/Cyb5r4/Dnm2/Spr/Becn1/Gadd45a/Gch1/Eef1a1/Crp/Tlr4/Il18/Prex1/Thbs1/Tspo/Zc3h12a/Pid1/Foxo3/Agtr1a/Mapk14/Sirt5/Pla2r1/Ptk2b/Trp53/Prcp/Gpx1/ND2/Raet1b/Bn…	72
BP	GO:0046496	nicotinamide nucleotide metabolic process	45/4218	129/20432	0.000119304	0.0029525	Hk2/Haao/Idh3g/Ier3/Shpk/Hsd11b1/Aldoc/Fdxr/Mdh2/Igf1/Galk1/Tkt/Nadk2/Ppara/Nnt/Taldo1/Mpc2/Gpd2/Idh3b/Aldob/Vcp/Gale/Pgd/H6pd/Nadk/Ldhb/Idh2/Qprt/Nadsyn1/Me1/Nmnat3/Cyb5r4/Tkfc/Galt/Gpi1/Aspdh/Kmo/Fmo2/Pklr/Eno4/Rpia/Gapdh/Trp53/Pgk1/Ldha	45
BP	GO:0044262	cellular carbohydrate metabolic process	74/4218	240/20432	0.000120145	0.00296023	Hk2/Kat2b/Akt1/Gnmt/Ier3/Mogat1/Pten/Ppp1cb/Hsd11b1/C1qtnf1/Slc35b4/Pdk4/Igf1/Igfbp3/Galk1/Pygl/Gpld1/Nln/Ppara/Gbe1/Gsk3b/Rgn/Synj2/Park2/Pcdh12/Impa2/Bad/Gk/Got1/Pfkfb1/Idh1/Slc45a3/Adipor1/Impa1/Dyrk2/Pgd/Mtor/Abcg2/Gfpt1/Gys2/Idh2/Dgat2/Phka2/B3gnt3/Abhd10/Agl/Ppip5k1/Phka1/Tkfc/Phkb/Pomk/Enpp1/Pdk2/Ppp1ca/Serpina12/Acacb/Prkce/Glb1/Ppp1r2/Stbd1/Adra1b/Mogat2/Epm2a/Per2/Lepr/Ptk2b/Trp53/Ext1/…	74
BP	GO:0010613	positive regulation of cardiac muscle hypertrophy	15/4218	28/20432	0.000121362	0.0029641	Cdk9/Ddx39b/Igf1/Parp1/Ppp3ca/Mtor/Mef2a/Agt/Pin1/Hand2/Pde9a/Prkca/Pde5a/Ece1/Fdps	15
BP	GO:0014742	positive regulation of muscle hypertrophy	15/4218	28/20432	0.000121362	0.0029641	Cdk9/Ddx39b/Igf1/Parp1/Ppp3ca/Mtor/Mef2a/Agt/Pin1/Hand2/Pde9a/Prkca/Pde5a/Ece1/Fdps	15
BP	GO:0006869	lipid transport	84/4218	280/20432	0.000124847	0.00303229	Apoh/Pparg/Akt1/Pon1/Apoc2/Crot/Cav1/Pla2g12b/Retn/Abca1/C1qtnf1/Acsl1/Abca5/Cry1/Acsl6/Slc9a3r1/Abcc3/Npc2/Lrp10/Ppara/Slc25a17/Srebf2/Gpihbp1/Slc10a2/Acat2/Stard4/Apom/Atp9b/Osbp/Acsl5/Rbp4/Abcc2/Abca2/Itgav/Slc27a2/Il1a/Atp9a/Pla2g12a/Plin2/Triap1/Osbpl3/Slco1b2/Slc27a5/Nucb2/Slco2b1/Aqp8/Lamtor1/Acsl4/Abcd1/Atp11a/Got2/Slc27a1/Agt/Apoa5/Ldlr/Lipc/Abcc4/P2ry2/Acsl3/Tmem30b/Lcat/Pnpla8/Scarb1/B…	84
BP	GO:0090207	regulation of triglyceride metabolic process	20/4218	43/20432	0.000126287	0.00303229	Apoh/Lmf1/Apoc2/Plin5/Ctdnep1/Acsl6/Srebf1/Gpld1/Rgn/Acsl5/Dgat2/Fgf21/Apoa5/Ldlr/Thrsp/Scarb1/Serpina12/Fitm2/Ces1g/Nr1h2	20
BP	GO:1900407	regulation of cellular response to oxidative stress	28/4218	69/20432	0.000126323	0.00303229	Psap/Hspb1/Met/Nol3/Nfe2l2/Rack1/Fut8/Ripk1/Glrx/Dhfr/Rgn/Park2/Scly/Parp1/Fbxw7/Txn1/Hgf/Park7/Hsph1/Hdac6/Nup93/Tbc1d24/Vnn1/Gch1/Gfer/Foxo3/Trp53/Gpx1	28
BP	GO:1903321	negative regulation of protein modification by small protein conjugation or removal	28/4218	69/20432	0.000126323	0.00303229	Cav1/Chp1/Fbxo5/Fyn/Psen1/Cry1/Hmg20b/Nxn/Anks1/Gnl3l/Pdcl3/Abl1/Park7/Mtor/Mad2l2/Limk1/Mad2l1/Prmt3/Rps3/Gclc/Usp4/Isg15/Ufl1/Tspo/Prkce/Per2/Parp10/Ubxn1	28
BP	GO:0072524	pyridine-containing compound metabolic process	46/4218	133/20432	0.000127156	0.00303924	Hk2/Haao/Idh3g/Ier3/Shpk/Hsd11b1/Aldoc/Fdxr/Mdh2/Igf1/Galk1/Tkt/Nadk2/Ppara/Nnt/Taldo1/Mpc2/Gpd2/Idh3b/Aldob/Vcp/Gale/Pgd/H6pd/Nadk/Ldhb/Idh2/Qprt/Nadsyn1/Me1/Nmnat3/Cyb5r4/Tkfc/Galt/Gpi1/Nmrk1/Aspdh/Kmo/Fmo2/Pklr/Eno4/Rpia/Gapdh/Trp53/Pgk1/Ldha	46
BP	GO:0000302	response to reactive oxygen species	54/4218	163/20432	0.000128309	0.00305295	Hnrnpd/Psap/Aqp1/Met/Ppp2cb/Aldh3a2/Hyal2/Nol3/Nfe2l2/Glrx2/Pcgf2/Hdac2/Rack1/Net1/Fos/Ripk1/Glrx/Dhfr/Ppif/Rgn/Parp1/Lcn2/Abl1/Itgav/Pdcd10/Casp6/Txn1/Prdx1/Hgf/Park7/Pdgfra/Hsph1/Atg7/Rps3/Hdac6/Sesn3/Nup93/Nudt15/Gch1/Pdk2/Thbs1/Adprhl2/Foxo3/Prkca/Ercc6/Rhob/Fabp1/Zfp277/Fxn/Ptk2b/Trp53/Stk24/Gpx1/Bnip3	54
BP	GO:0036474	cell death in response to hydrogen peroxide	16/4218	31/20432	0.000129367	0.00305295	Psap/Met/Nol3/Nfe2l2/Rack1/Ripk1/Glrx/Pdcd10/Txn1/Hgf/Park7/Hsph1/Hdac6/Nup93/Foxo3/Trp53	16
BP	GO:0042558	pteridine-containing compound metabolic process	16/4218	31/20432	0.000129367	0.00305295	Fpgs/Qdpr/Pah/Pcbd1/Mthfd1/Dhfr/Shmt2/Tyms/Mthfr/Aldh1l1/Spr/Gch1/Mthfd1l/Mthfs/Ggh/Mthfsl	16
BP	GO:0010634	positive regulation of epithelial cell migration	38/4218	104/20432	0.00013117	0.00308249	Itga3/Akt1/Aqp1/Rab11a/Hspb1/Tek/Met/Nfe2l2/Plcg1/Pfn1/Gpld1/Pdcd6/Angpt1/Snai2/Epb41l5/Anxa3/Hdac6/Fgfr1/Agt/Ets1/Ctsh/Tgfbr2/Fgf1/Serpine1/Atoh8/Thbs1/Prkd2/Zc3h12a/Prkce/Prkca/Rhob/Bcas3/Ptk2b/Itgb1bp1/Kdr/Clasp1/Insl3/Ccr5	38
BP	GO:0042398	cellular modified amino acid biosynthetic process	17/4218	34/20432	0.000133122	0.00310636	Ggt5/Fpgs/Nfe2l2/Gamt/Mthfd1/Dhfr/Gatm/Gclm/Park7/Eif2ak3/Slc27a1/Gclc/Gch1/Ggt6/Mthfd1l/Mthfs/Mthfsl	17
BP	GO:0043648	dicarboxylic acid metabolic process	30/4218	76/20432	0.000133835	0.00310636	Haao/Idh3g/Cs/Fpgs/Acsf3/Acot8/Mdh2/Acly/Stat5b/Glud1/Sucla2/Pcx/Got1/Idh1/Glul/Fh1/Idh3b/Gclm/Htt/Qprt/Got2/Gclc/Me1/Nmnat3/Grhpr/Kmo/Kyat3/Acot4/Suclg1/Ddo	30
BP	GO:0043122	regulation of I-kappaB kinase/NF-kappaB signaling	61/4218	190/20432	0.000133852	0.00310636	Trim25/Rhoc/Tmed4/Hspb1/Rhoa/Gprc5b/Faf1/Nol3/Sqstm1/Fyn/Tnip1/Ppm1a/Ripk1/Mtdh/Angpt1/Sharpin/Tfg/Park2/Pdpk1/Ndfip1/Trim8/Btrc/Shisa5/Stat1/Nek6/Abl1/Slc20a1/Il1a/Rbck1/Tlr2/Cth/Prdx1/Lurap1/Zc3hav1/Zdhhc13/Zfand6/Flna/Nlrx1/Atp2c1/Uaca/Ubd/Trim13/Nfkbid/Tgm2/Tlr4/Il18/S100a13/Zc3h12a/Tlr7/Prkce/Cxxc5/Gja1/Ndfip2/Eef1d/Tnip2/Tnfrsf19/Tank/Akap13/Lgals1/Ddrgk1/Nlrp12	61
BP	GO:1903829	positive regulation of cellular protein localization	94/4218	321/20432	0.000136743	0.00316034	Cav2/Itga3/Akt1/Emd/Rab11a/Tek/Kif5b/Cct4/Dmap1/Hyal2/Cdk5rap3/Fyn/Igf1/Sptbn1/Rack1/Ppm1a/Hsp90aa1/Nkd2/Tert/Bmpr1a/Cct5/Srebf2/Gsk3b/Hcls1/Slc17a9/Hsp90ab1/Pdpk1/Bambi/Hdac3/Smad4/Trim8/Huwe1/Gnl3l/Cct8/Itgb1/Parp1/Hnmt/Lrp4/Rbck1/Tlr2/Fbxw7/Ppp3ca/Park7/Arhgef16/Rufy3/Cdkl2/Tnfrsf1a/Psmd8/Itgax/Stx4a/Chp2/Flna/Gas6/Rbpms/Eif2ak3/Snx33/Ablim3/Acsl3/Nup93/Usp36/Ppp3r1/Tmem30b/Uaca/Oaz1/Ccl2/Sh3g…	94
BP	GO:0006611	protein export from nucleus	24/4218	56/20432	0.000138092	0.00317839	Emd/Calr/Chp1/Xpo1/Dnajc27/Ppm1a/Rangap1/Gsk3b/Hdac3/Txn1/Park7/Ran/Gas6/Chchd4/Nxt1/Egr2/Camk4/Smurf1/Cchcr1/Nup88/Styx/Frat1/Strada/Wipf1	24
BP	GO:0033539	fatty acid beta-oxidation using acyl-CoA dehydrogenase	4218-12-01	20/20432	0.000139262	0.00319218	Acadvl/Acadl/Acad9/Etfdh/Acox3/Acad10/Acads/Acad8/Etfa/Etfbkmt/Acadm/Acad11	12
BP	GO:0071322	cellular response to carbohydrate stimulus	39/4218	108/20432	0.000143907	0.0032852	Sri/Cacna1e/Kif5b/Igf1/Rack1/Stxbp4/Gpld1/Hmgcr/Slc26a6/Rps6ka2/Park2/Bad/Map4k4/Gpr39/Mpc2/Ppp3ca/Cyp7a1/Slc2a5/Aacs/Atg7/Nox4/Stx4a/Gas6/Smarca4/Adra2a/Pim3/Sin3a/Pla2g6/Prkce/Gpr68/Kcnb1/Prkca/Jagn1/Lepr/Calcrl/Gpx1/Hmgn3/Rab11b/Mup1	39
BP	GO:0008654	phospholipid biosynthetic process	45/4218	130/20432	0.0001464	0.00332852	Lpcat3/Mvd/Pigyl/Acsl6/Sptlc2/Lpcat1/Hexb/Fitm1/Chkb/Pigp/Pigx/Pigf/Chka/Pcx/Acsl5/Pcyt2/Pi4k2a/Pdgfa/Idh1/Pigc/Dpm2/Crls1/Impa1/Pmvk/Pip5k1a/Pigo/Agpat9/Tamm41/Cdipt/Pgap2/Slc27a1/Agpat1/Sh3glb1/Pigk/Cept1/Mvk/Pla2g6/Fitm2/Lclat1/Adgrf5/Sphk2/Cecr5/Fdps/Chpt1/Etnk2	45
BP	GO:0046931	pore complex assembly	4218-10-01	15/20432	0.000149062	0.00336172	Rtn4/Nup153/Bad/Cct8/Ahctf1/Tmem170/Nup93/Tmem33/Nup205/Nup107	10
BP	GO:2001241	positive regulation of extrinsic apoptotic signaling pathway in absence of ligand	4218-10-01	15/20432	0.000149062	0.00336172	Bax/Wwox/Ppp2r1a/Fas/Jak3/Dapk3/Ctnna1/Ppp1ca/Inhba/Htra2	10
BP	GO:0007584	response to nutrient	23/4218	53/20432	0.000150553	0.00338169	Ada/Snw1/Plec/Arsa/Snai2/Pim1/Eif2ak2/Stat1/Gatm/Pdia3/Ahcy/Postn/Bche/Alad/Aacs/Serpina7/Gas6/Kank2/Slc16a1/Dpyd/Agl/Pdk2/Hlcs	23
BP	GO:0010595	positive regulation of endothelial cell migration	26/4218	63/20432	0.000156852	0.00349736	Akt1/Hspb1/Tek/Met/Nfe2l2/Plcg1/Gpld1/Pdcd6/Angpt1/Snai2/Anxa3/Fgfr1/Agt/Ets1/Fgf1/Atoh8/Thbs1/Prkd2/Zc3h12a/Prkca/Rhob/Bcas3/Ptk2b/Itgb1bp1/Kdr/Ccr5	26
BP	GO:0000422	mitophagy	61/4218	191/20432	0.000157578	0.00349736	Hk2/Hsf2bp/Atg4d/Tmem39a/Nr2c2/Sqstm1/Myh11/Slc1a4/Pex13/Srebf1/Hapln1/Bnip3l/Acin1/Ndufb9/Srebf2/Mylk/Chaf1b/Slc17a9/Park2/Slc22a3/Atg2a/Fundc1/Pi4k2a/Rnf41/Rb1cc1/Atp1b1/Snrpb/Map1lc3a/Anxa5/Alpk1/Fbxw7/Cisd2/Ulk1/Gabarapl1/Atg7/Hdac6/Map1lc3b/Car7/Gabarapl2/Atg12/Nup93/Usp36/Becn1/Cox8a/Fam13b/Mbd5/Mex3c/Smurf1/Supt3/Zfp189/Stat2/Ambra1/Prkd2/Tspo/Wipi1/Trem1/Akr1e1/Txlna/Fabp1/Trp53/Tmem203	61
BP	GO:0061726	mitochondrion disassembly	61/4218	191/20432	0.000157578	0.00349736	Hk2/Hsf2bp/Atg4d/Tmem39a/Nr2c2/Sqstm1/Myh11/Slc1a4/Pex13/Srebf1/Hapln1/Bnip3l/Acin1/Ndufb9/Srebf2/Mylk/Chaf1b/Slc17a9/Park2/Slc22a3/Atg2a/Fundc1/Pi4k2a/Rnf41/Rb1cc1/Atp1b1/Snrpb/Map1lc3a/Anxa5/Alpk1/Fbxw7/Cisd2/Ulk1/Gabarapl1/Atg7/Hdac6/Map1lc3b/Car7/Gabarapl2/Atg12/Nup93/Usp36/Becn1/Cox8a/Fam13b/Mbd5/Mex3c/Smurf1/Supt3/Zfp189/Stat2/Ambra1/Prkd2/Tspo/Wipi1/Trem1/Akr1e1/Txlna/Fabp1/Trp53/Tmem203	61
BP	GO:0016071	mRNA metabolic process	135/4218	492/20432	0.000160749	0.00355363	Mov10/Wdr83/Pan2/Bcas2/Dhx34/Lsm2/Khsrp/Snrpb2/Dqx1/Rnmt/Cdk9/Raver1/Rbm25/Nol3/Hspa8/Skiv2l2/Exosc10/Ddx39b/Supv3l1/Sf3a2/Pnpt1/Nbas/Prpf8/Eftud2/Zc3h14/Snw1/Papola/Snrnp48/Ddx46/Srek1ip1/Rbm26/Mbnl2/Acin1/Khdrbs3/Eif3e/Zcrb1/Ncbp2/App/Noct/Srsf7/Mtpap/Etf1/Nelfe/Iws1/Dcp2/Prpf19/Sf1/Pdcd11/Clns1a/Lmntd2/Cpeb1/Exosc7/Cdc73/Snrpb/Rbm38/Exosc8/Adar/Rnpc3/Zranb2/Ptbp3/Psip1/Ybx1/Pnrc2/Srsf10/Ppp1r8…	135
BP	GO:0009101	glycoprotein biosynthetic process	80/4218	266/20432	0.000163051	0.00359034	Kat2b/Sdf2/Lmf1/Man1a/Derl3/Ube2g2/Chp1/Acot8/Slc35c2/Aatf/Psen1/Igf1/Phlda1/Mgat1/Tnip1/Galnt10/Fut8/Trim23/Itm2b/Pmm2/St3gal6/Parp3/Parp1/Dpm2/Vcp/Slc35d1/St3gal3/Tmem59/Extl1/Mogs/Rpn1/Art4/Magt1/Itm2a/B3gnt3/Jak3/St3gal4/Stt3a/Lipc/Stt3b/Engase/Pomt2/Ramp1/Tmem5/Eogt/Ggta1/Alg12/Parp2/Mgat5/Pomk/Chst7/A4gnt/Hpf1/Edem2/B3galnt2/Pomt1/Alg1/Dse/Alg2/Pum3/C1galt1/Mustn1/Krtcap2/Ispd/Pxylp1/Dpy19l…	80
BP	GO:0022618	ribonucleoprotein complex assembly	57/4218	176/20432	0.000168475	0.00369522	Lsm2/Rpl10/Rps25/Rps5/Nol3/Ddx39b/Sf3a2/Eral1/Prpf8/Eif5/Mterf3/Noct/Rps14/Prpf19/Clns1a/Mterf4/Snrpb/Eif2a/Adar/Psip1/Srsf10/Mrpl20/Sfswap/Rpl6/Luc7l2/Strap/Mrps11/Rbmx/Pqbp1/Atr/Rpsa/Usp4/Atxn2l/Efl1/Rpl12/Rps19/Ago1/Rps2/Ddx28/Rps10/Txnl4a/Rpl23a/Rpl5/Eif4b/Rpl11/Rpl3/Gemin2/Rps17/Srpk2/Rps15/Lsm14a/Rps28/Rpl13a/Taf9/Snrpe/Rps27/Gm5093	57
BP	GO:0030490	maturation of SSU-rRNA	21/4218	47/20432	0.00017537	0.00383143	Emg1/Utp20/Nol11/Rps14/Rps24/Mrps11/Lsm6/Rpsa/Noc4l/Utp6/Rps16/Rps21/Tbl3/Rps19/Rps8/Utp18/Nhp2l1/Utp14a/Rps28/Utp3/Utp14b	21
BP	GO:0043434	response to peptide hormone	79/4218	263/20432	0.000186407	0.00405671	Cav2/Pparg/Kat2b/Akt1/Cdk4/Cav1/Retn/Cad/Cacybp/Slc2a4/Irf1/Pdk4/Sgk1/Cry1/Igf1/Eif4ebp2/Srebf1/Stxbp4/Rab10/Stat5b/Gpld1/Ppara/Rangap1/Cyc1/Prkdc/Pdpk1/Mzb1/Rbp4/Baiap2/Cpeb1/Hadha/Stat1/Scly/Adipor1/Parp1/Nr4a2/Gatm/Ptpn1/Car2/Anxa5/Stxbp3/Aldob/Ybx1/Eif2b3/Pik3r3/Slc25a33/Mtor/Eif2b1/Nucb2/Slc27a1/Agt/Sesn3/Cdo1/Mbd5/Enpp1/Prkci/Egr2/H2afz/Dennd4c/Pdk2/Il18/Ncoa5/Appl1/Pklr/Pik3r1/Serpina12/Pc…	79
BP	GO:0006163	purine nucleotide metabolic process	120/4218	431/20432	0.000191703	0.00415579	Cox5a/Atp5f1/Hk2/Tcirg1/Atp5d/Ier3/Crot/Aqp1/Atp6v1b2/Rhoa/Slc25a13/Abca1/Mocs2/Hspa8/Aldoc/Ada/Atp5g3/Pank3/Atp6v0a1/Nudt4/Igf1/Hint1/Rack1/Guk1/Galk1/Mthfd1/Ndufs6/Hmgcr/Ppif/Pnp/Npr3/Ndufb9/Ppara/Park2/Ndufaf7/Cox7a2l/Gnal/Bad/Nt5c2/Ndufb8/Atp5b/Prps2/Atp5c1/Ndufa10/Parp1/Atp1b1/Gnas/Samhd1/Ampd2/Gucy1b3/Papss1/Aldob/Vcp/Pde4b/Ppcs/Cap1/Gale/Ak2/Park7/Slc25a33/Paics/Nudt9/Gbas/Atp2b2/Coq7/Nucb…	120
BP	GO:1902882	regulation of response to oxidative stress	29/4218	74/20432	0.000199423	0.00430645	Psap/Hspb1/Met/Nol3/Nfe2l2/Rack1/Fut8/Ripk1/Glrx/Dhfr/Rgn/Park2/Scly/Parp1/Fbxw7/Txn1/Hgf/Park7/Hsph1/Hdac6/Sesn3/Nup93/Tbc1d24/Vnn1/Gch1/Gfer/Foxo3/Trp53/Gpx1	29
BP	GO:0043171	peptide catabolic process	15/4218	29/20432	0.000203538	0.00436163	Lta4h/Acy1/Lnpep/Cndp2/Xpnpep1/Cpn1/Rnpepl1/Enpep/Ctsh/Cpq/Rnpep/Pm20d1/Cndp1/Ide/Ece1	15
BP	GO:1903205	regulation of hydrogen peroxide-induced cell death	15/4218	29/20432	0.000203538	0.00436163	Psap/Met/Nol3/Nfe2l2/Rack1/Ripk1/Glrx/Txn1/Hgf/Park7/Hsph1/Hdac6/Nup93/Foxo3/Trp53	15
BP	GO:0050994	regulation of lipid catabolic process	23/4218	54/20432	0.000211405	0.00451141	Apoh/Akt1/Apoc2/Cdk4/Plin5/Sptlc2/Gpld1/Cpt1a/Acsl5/Idh1/Dbi/Mtor/Fgf21/Apoa5/Adra2a/Etfbkmt/Acacb/Adora1/Prkce/Hcar2/Fabp1/Bscl2/Mlycd	23
BP	GO:0042537	benzene-containing compound metabolic process	4218-11-01	18/20432	0.000212947	0.00451141	Gstm7/Afmid/Gstm4/Tdo2/Cyp4b1/Ido2/Kyat1/Kmo/Kyat3/Gstm2/Ugt1a1	11
BP	GO:0043153	entrainment of circadian clock by photoperiod	4218-11-01	18/20432	0.000212947	0.00451141	Nr2f6/Ppp1cc/Ppp1cb/Cry1/Fbxl3/Bhlhe40/Usp2/Fbxl21/Ppp1ca/Trp53/Cry2	11
BP	GO:1903828	negative regulation of cellular protein localization	45/4218	132/20432	0.000217868	0.00459824	Emd/Sri/Rab23/Tmbim1/Derl3/Ube2g2/Faf1/Chp1/Nol3/H2afy/Akap1/Derl2/Pbld1/Erlec1/Slc9a3r1/Ppm1a/Angpt1/Rangap1/Snai2/Gsk3b/Pkdcc/Hdac3/Nedd4l/Lypla1/Pkia/Txn1/Tmem59/Dyrk2/Park7/Mtor/Hsph1/Gas6/Dclk3/Snx33/Uaca/Hectd1/Os9/Sin3a/Zc3h12a/Pid1/Lrrc15/Itgb1bp1/Ei24/Parp10/Nlrp12	45
BP	GO:0006665	sphingolipid metabolic process	42/4218	121/20432	0.000223555	0.00470054	Gm2a/Bax/Psap/Smpd4/Elovl1/Kdsr/Cers2/Serinc3/Smpdl3a/Sptlc2/Elovl2/Hexb/Plpp1/St3gal6/Hexa/Itgb8/Gba2/St3gal3/Agk/Atg7/Gla/Pla2g15/Smpd3/St3gal4/Cln6/Hacd3/Neu3/Ormdl3/Degs1/Elovl3/9130409I23Rik/Spns2/Elovl6/Pla2g6/Sptssa/St3gal5/Sphk2/Hacd1/Crem/Cerkl/Neu2/St6galnac4	42
BP	GO:0006720	isoprenoid metabolic process	28/4218	71/20432	0.000225167	0.00471669	Mvd/Aldh3a2/Dhdds/Fdft1/Hmgcr/Dhrs4/Rbp4/Cyp2e1/Pecr/Phyh/Pdss1/Dpm2/Hmgcs2/Pmvk/Akr1b8/Cyp1a2/Mvk/Ispd/Rdh9/Retsat/Fdps/Ttr/Cyp26b1/Dhrs3/Rdh11/Rdh16/Adh1/Hmgcs1	28
BP	GO:0045732	positive regulation of protein catabolic process	56/4218	174/20432	0.000229343	0.00476998	Akt1/Ier3/Snf8/Rnf114/Pttg1ip/Pten/Psen1/Sumo3/Rack1/Rnf144a/Gpld1/Nkd2/Lpcat1/Rnf19a/Gsk3b/Rgn/Park2/Axin1/Rnf138/Bag6/Ndfip1/Nedd4l/Arih1/Rhbdd1/Sh3d19/Fbxw7/Vcp/Atg7/Ctsc/Rnf40/Cul4b/Gclc/Trib1/Snx33/Rnf125/Gga1/Adra2a/Nsf/Oaz1/Prickle1/Rnf139/Rnf144b/Mylip/Edem2/Smurf1/Stub1/Rfwd2/Pcsk9/Sorl1/Gja1/Zfand2a/Egln2/Ptk2b/Rnf217/Ddrgk1/Tnfsf12	56
BP	GO:0038034	signal transduction in absence of ligand	30/4218	78/20432	0.000230557	0.00476998	Bax/Wwox/Ppp2r1a/Erbb3/Fyn/Igf1/Mknk2/Ripk1/Tert/Itm2b/Snai2/Gsk3b/Fas/Bad/Agap2/Sgk3/Bok/Lcn2/Itgav/Il1a/Fgfr1/Jak3/Dapk3/Ctnna1/Ppp1ca/Inhba/Foxo3/Bak1/Htra2/Bcl2a1a	30
BP	GO:0097192	extrinsic apoptotic signaling pathway in absence of ligand	30/4218	78/20432	0.000230557	0.00476998	Bax/Wwox/Ppp2r1a/Erbb3/Fyn/Igf1/Mknk2/Ripk1/Tert/Itm2b/Snai2/Gsk3b/Fas/Bad/Agap2/Sgk3/Bok/Lcn2/Itgav/Il1a/Fgfr1/Jak3/Dapk3/Ctnna1/Ppp1ca/Inhba/Foxo3/Bak1/Htra2/Bcl2a1a	30
BP	GO:0009100	glycoprotein metabolic process	89/4218	305/20432	0.000231122	0.00476998	Kat2b/Sdf2/Lmf1/Man1a/Ihh/Derl3/Ube2g2/Chp1/Acot8/Slc35c2/Aatf/Dcn/Psen1/Igf1/Phlda1/Mgat1/Tnip1/Galnt10/Fut8/Trim23/Ngly1/Itm2b/Pmm2/St3gal6/Parp3/Parp1/Apcs/Dpm2/Bmp2/Vcp/Slc35d1/St3gal3/Tmem59/Extl1/Mogs/Rpn1/Art4/Magt1/Itm2a/B3gnt3/Jak3/St3gal4/Stt3a/Lipc/Stt3b/Mamdc2/Engase/Pomt2/Gpc1/Ramp1/Tmem5/Eogt/Hpse/Ggta1/Alg12/Parp2/Mgat5/Pomk/Chst7/A4gnt/Hpf1/Edem2/B3galnt2/Pomt1/Alg1/Dse/Alg2/Pum3/…	89
BP	GO:0007264	small GTPase mediated signal transduction	131/4218	480/20432	0.000255114	0.00524579	Rnd2/Itga3/Sipa1l2/Rhoc/Dnaja3/Myo9b/Rab23/Rab11a/Stambp/Rhoa/Vav2/Ppp2cb/Rassf1/Csf1/Rabl6/Lrrk1/Abca1/Eps8/Celsr1/Ift27/Cyth1/Rnd3/Rhot1/Crk/Wasf1/Rab32/Igf1/Rab21/Arf5/Dnajc27/Rab10/Rasl10b/Pecam1/Net1/Gdi2/Rasa1/Trim23/Arhgef3/Nisch/Trio/Robo1/Itsn1/Rab12/Tiam2/Rab27b/Shoc2/Plce1/Dnmbp/Rabgef1/Baiap2/Aatk/Agap2/Eps8l2/Farp1/Dock9/Arhgef9/Itgb1/Arl10/Ngef/Rgl1/Rsu1/Rab14/Psd4/Rit1/Ntrk1/Gem/Ar…	131
BP	GO:0007163	establishment or maintenance of cell polarity	54/4218	167/20432	0.00025736	0.00525581	Dlg3/Spag5/Aqp1/Myo9b/Wdr1/Pard6a/Tek/Pdzd11/Cyth1/Syne4/Lin7a/Igf1/Actr2/Wdpcp/Rab10/Slc9a3r1/Myh9/Gsk3b/Gbf1/Rnf41/Kif26b/Lin7c/Pax6/Lmna/Macf1/Cap1/Htt/Rufy3/Exoc4/Frmd4b/Sipa1l3/Parva/Nek3/Cdh5/Zw10/Map4/Nphp3/Spry1/Prkci/Ctnna1/Mapkap1/Cdk5rap2/Mcph1/Wdr81/Insc/Gja1/Rap1b/Cfl1/Bcas3/Ptk2b/Cyp26b1/Clasp1/Spdl1/Fat1	54
BP	GO:0000910	cytokinesis	41/4218	118/20432	0.000257481	0.00525581	Rhoc/Pkn2/Rab11a/Stambp/Rhoa/Dstn/Rab11fip4/Cenpv/Actr2/E2f7/Sptbn1/Myh10/Kif13a/Bin3/E430025E21Rik/Myh9/Spast/Incenp/Sept2/Ahctf1/Sdccag3/Jtb/Tas1r2/Stmn1/Cetn2/Pin1/Snx33/Cntrob/Map9/Becn1/Spg20/Sh3glb1/Cul7/Prkce/E2f8/Chmp3/Rhob/Cfl1/Zfyve26/Ank3/Klhl9	41
BP	GO:0051224	negative regulation of protein transport	65/4218	210/20432	0.000266552	0.00542119	Vpreb3/Emd/Sri/Rab23/Derl3/Ube2g2/Faf1/Chp1/Nol3/Akap1/Derl2/Pbld1/Srgn/Rhbdf1/Erlec1/Srebf1/Rsad2/Slc9a3r1/Ppm1a/Trim27/Hmgcr/Angpt1/Rangap1/Snai2/Gsk3b/Park2/Pkdcc/Ndfip1/Hdac3/Rabgef1/Rptor/Lypla1/Map4k4/Parp1/Pkia/Anxa5/Hadh/Ppp3ca/Txn1/Dyrk2/Park7/Mtor/Psmd9/Anxa4/Idh2/Otud5/Gas6/Rab11fip1/Wwp2/Adra2a/Uaca/Pim3/Cd84/Os9/Madd/Zc3h12a/Kcnb1/Jagn1/Ndfip2/Mtnr1a/Itgb1bp1/Ei24/Parp10/Mup1/Nlrp12	65
BP	GO:0007623	circadian rhythm	58/4218	183/20432	0.000281724	0.00570899	Pparg/Hnrnpd/Nr2f6/Relb/Ppp1cc/Pten/Ppp1cb/Ptgds/Ada/Hdac2/Cry1/Igf1/Srebf1/Id4/Fbxl3/Ppara/Prkdc/Gsk3b/Noct/Hdac3/Fas/Btrc/Npas2/Ahcy/Ntrk1/Per3/Clock/Gfpt1/Bhlhe40/Bhlhe41/Usp2/Hcrtr2/Dpyd/Ccar2/Fbxl21/Klf10/Atf5/Ciart/Arntl2/Ppp1ca/Mybbp1a/Adora1/Sin3a/Phlpp1/Bdnf/Nrip1/Mat2a/Mtnr1a/Arntl/Ntrk2/Per2/Nfil3/Lepr/Trp53/Dbp/Cry2/Prok1/Mup1	58
BP	GO:0051493	regulation of cytoskeleton organization	115/4218	414/20432	0.000283928	0.0057247	Chordc1/Cdkn1b/Chmp2b/Wdr1/Tek/Pfdn2/Cav1/Rhoa/Mid1ip1/Rassf1/Capza2/Eps8/Dstn/Celsr1/Crk/Pfn1/Hdac2/Wasf1/Sgk1/Ctgf/Actr2/Xpo1/Sptbn1/Pecam1/Trim27/Carmil1/Ctsl/Rasa1/Jmy/Mtss1/Cep97/Hcls1/Lima1/Park2/Baiap2/Stau2/Dst/Pam/Abl1/Neb/Mkks/Il1a/Chmp5/Stmn1/Sh3bgrl3/Arhgef19/Mtor/Stap1/Hsph1/Limk1/Lmod2/Arhgdib/Fkbp4/Nox4/Coro1a/Rps3/Hdac6/Flna/Arhgap6/Mylk3/Katnb1/Chek1/Kank2/Tpm1/Nck1/Arap1/Ppp1r9a…	115
BP	GO:0071248	cellular response to metal ion	34/4218	93/20432	0.000285549	0.0057247	Pparg/Cdkn1b/Fosb/Aqp1/Cyp2a5/Atp7b/Slc41a1/Krt10/Fos/Gpld1/Ppif/Mylk/Hrg/Fas/Nptx1/Slc40a1/Gpr39/Mef2a/Fus/Chp2/Nfatc3/Cyp1a2/Rasgrp2/Syt1/Clic4/Crp/Bmp6/Slc25a23/Junb/Alox5ap/B2m/Ank3/Bnip3/Prnp	34
BP	GO:0042273	ribosomal large subunit biogenesis	26/4218	65/20432	0.00028557	0.0057247	Aamp/Rpl10/Nop16/Tex10/Ebna1bp2/Mrpl20/Rpl6/Rpl10a/Rpl12/Rpl7/Ddx28/Zfp622/Npm1/Rpl23a/Rpl5/Rpl11/Rpl3/Rpl35a/Nsa2/Rpl26/Rpl7a/Rpl35/Nhp2l1/Rpl7l1/Yae1d1/Gm5093	26
BP	GO:0090317	negative regulation of intracellular protein transport	32/4218	86/20432	0.000294823	0.0058891	Emd/Sri/Rab23/Derl3/Ube2g2/Faf1/Chp1/Nol3/Akap1/Derl2/Pbld1/Erlec1/Slc9a3r1/Ppm1a/Angpt1/Rangap1/Snai2/Gsk3b/Hdac3/Pkia/Txn1/Dyrk2/Park7/Mtor/Gas6/Uaca/Os9/Zc3h12a/Itgb1bp1/Ei24/Parp10/Nlrp12	32
BP	GO:0006643	membrane lipid metabolic process	53/4218	164/20432	0.000296455	0.00590061	Gm2a/Bax/Psap/Smpd4/Elovl1/Kdsr/Pigyl/Cers2/Serinc3/Smpdl3a/Sptlc2/Gpld1/Elovl2/Hexb/Plpp1/St3gal6/Pigp/Pigx/Pigf/Hexa/Itgb8/Pigc/Dpm2/Pigo/Gba2/St3gal3/Agk/Atg7/Pgap2/Gla/Pla2g15/Smpd3/St3gal4/Cln6/Hacd3/Neu3/Ormdl3/Degs1/Elovl3/9130409I23Rik/Pigk/Spns2/Elovl6/Pla2g6/Sptssa/Agmo/St3gal5/Sphk2/Hacd1/Crem/Cerkl/Neu2/St6galnac4	53
BP	GO:0009259	ribonucleotide metabolic process	118/4218	427/20432	0.000297529	0.005901	Cox5a/Atp5f1/Hk2/Tcirg1/Atp5d/Ier3/Crot/Aqp1/Atp6v1b2/Rhoa/Cad/Slc25a13/Abca1/Mocs2/Hspa8/Aldoc/Atp5g3/Pank3/Atp6v0a1/Nudt4/Igf1/Hint1/Rack1/Guk1/Galk1/Ndufs6/Hmgcr/Ppif/Pnp/Npr3/Ndufb9/Ppara/Umps/Park2/Ndufaf7/Cox7a2l/Gnal/Bad/Nt5c2/Ndufb8/Atp5b/Prps2/Atp5c1/Ndufa10/Parp1/Atp1b1/Gnas/Ampd2/Gucy1b3/Papss1/Aldob/Vcp/Pde4b/Ppcs/Cap1/Gale/Ak2/Park7/Slc25a33/Paics/Nudt9/Gbas/Atp2b2/Coq7/Nucb2/Adrb3/N…	118
BP	GO:0010256	endomembrane system organization	132/4218	486/20432	0.000301538	0.00595938	Cav2/Lman2l/Itga3/Akt1/Tspan33/Use1/Aqp1/Rab11a/Chmp2b/Ndrg1/Tmbim1/Kif5b/Cav1/Pten/Gorasp2/Abca1/Pacsin2/Ctdnep1/Cog1/Srgn/Sptbn1/Rack1/Rtn4/Ubxn2a/Efr3b/Rab10/Slc9a3r1/Myh10/Stx8/Vrk1/Vti1b/Kif13a/Nkd2/Ywhaz/Mtss1/Emp2/Krt18/Myl12a/Ehd3/Spast/Pdpk1/Bnip1/Pkdcc/Bag6/Rtn3/Atl3/Gbf1/Baiap2/Itgb1/Get4/Lypla1/Serpine2/Atp1b1/Tor1b/Tor1a/Sec16a/Pdcd10/Lmna/Pip5k1a/Tmem59/Plekhm2/Arhgef16/Htt/Stx18/Ri…	132
BP	GO:0022411	cellular component disassembly	111/4218	398/20432	0.000304157	0.00598997	Hk2/Hsf2bp/Atg4d/Tmem39a/Bax/Wdr1/Fgfr4/Nr2c2/Kif5b/Mid1ip1/Hspa8/Capza2/Eps8/Sqstm1/Dstn/Cdk5rap3/Myh11/Noxo1/Mtrf1l/Sgk1/Slc1a4/Pex13/Sptbn1/Igfbp3/Srebf1/Vrk1/Carmil1/Hapln1/Lcp1/Bnip3l/Acin1/Fam134b/Ndufb9/Srebf2/Sharpin/Snai2/Mylk/Chaf1b/Lima1/Slc17a9/Park2/Slc22a3/Spast/Etf1/Atg2a/Fundc1/Pi4k2a/Gbf1/Dnase1l3/Rnf41/Rb1cc1/Atp1b1/Snrpb/Map1lc3a/Anxa5/Alpk1/Fbxw7/Cisd2/Dnase2b/Stmn1/Sh3bgrl3/D…	111
BP	GO:0006414	translational elongation	18/4218	39/20432	0.000307294	0.00603051	Rps9/Rplp1/Rps5/Rplp2/Eef1b2/Mrpl44/Sepsecs/Eefsec/Eef2/Eef2k/Secisbp2l/Eef1a1/Efl1/Cpeb3/Tsfm/Gtpbp1/Eef1d/Eef1g	18
BP	GO:0009150	purine ribonucleotide metabolic process	116/4218	419/20432	0.000308562	0.00603421	Cox5a/Atp5f1/Hk2/Tcirg1/Atp5d/Ier3/Crot/Aqp1/Atp6v1b2/Rhoa/Slc25a13/Abca1/Mocs2/Hspa8/Aldoc/Atp5g3/Pank3/Atp6v0a1/Nudt4/Igf1/Hint1/Rack1/Guk1/Galk1/Ndufs6/Hmgcr/Ppif/Pnp/Npr3/Ndufb9/Ppara/Park2/Ndufaf7/Cox7a2l/Gnal/Bad/Nt5c2/Ndufb8/Atp5b/Prps2/Atp5c1/Ndufa10/Parp1/Atp1b1/Gnas/Ampd2/Gucy1b3/Papss1/Aldob/Vcp/Pde4b/Ppcs/Cap1/Gale/Ak2/Park7/Slc25a33/Paics/Nudt9/Gbas/Atp2b2/Coq7/Nucb2/Adrb3/Nudt7/Cox4…	116
BP	GO:0033559	unsaturated fatty acid metabolic process	38/4218	108/20432	0.00031914	0.00621933	Cyp2c29/Gstm7/Cyp2a5/Ggt5/Fads1/Ptgds/Cyp2j9/Lta4h/Avpr1a/Ephx2/Cyp4f14/Cyp2c55/Cyp2c39/Cyp2c44/Cyp2e1/Ptges2/Tlr2/Fam213b/Tnfrsf1a/Hpgd/Pnpla8/Decr2/Scd1/Tlr4/Daglb/Cyp2c37/Cyp2g1/Ptges/Cyp2c50/Alox5ap/Cyp2a12/Cyp2c70/Cyp2c54/Ptges3/Ptgr2/Cyp2a4/Cyp2c68/Cyp2d12	38
BP	GO:0008333	endosome to lysosome transport	17/4218	36/20432	0.000320666	0.00622737	Snapin/Stx8/Kif13a/Rab12/Vps16/Snx16/Chmp5/Vps33a/Trak1/Vps41/Gprasp1/Fam160a2/Hook2/Chmp3/Rhob/Sort1/Scyl2	17
BP	GO:0042559	pteridine-containing compound biosynthetic process	4218-10-01	16/20432	0.000323785	0.0062662	Fpgs/Qdpr/Pcbd1/Mthfd1/Dhfr/Spr/Gch1/Mthfd1l/Mthfs/Mthfsl	10
BP	GO:2000379	positive regulation of reactive oxygen species metabolic process	33/4218	90/20432	0.000327311	0.00631259	Akt1/Cyba/Nfe2l2/Hsp90aa1/Cdkn1a/Rgn/Xdh/Rnf41/F2/Tlr2/Park7/Mtor/Cxcl1/Nox4/Smpd3/Agt/Tgfbr2/Dnm2/Gadd45a/Crp/Tlr4/Il18/Thbs1/Tspo/Zc3h12a/Pid1/Foxo3/Agtr1a/Mapk14/Ptk2b/Trp53/Raet1b/Tlr5	33
BP	GO:0000038	very long-chain fatty acid metabolic process	15/4218	30/20432	0.000329683	0.00631478	Elovl1/Acadvl/Acot2/Acot3/Elovl2/Slc27a2/Slc27a5/Abcd1/Tecr/Hacd3/Acaa1a/Elovl3/Elovl6/Acot4/Hacd1	15
BP	GO:0034381	plasma lipoprotein particle clearance	15/4218	30/20432	0.000329683	0.00631478	Lmf1/Apoc2/Gpld1/Gpihbp1/Apom/Ehd1/Lrpap1/Dgat2/Ldlr/Lipc/Scarb1/Crp/Mylip/Pcsk9/Ces1g	15
BP	GO:0043900	regulation of multi-organism process	116/4218	420/20432	0.000340985	0.00650897	Cav2/Trim25/Acvr1b/Il12rb1/Tmem39a/Rad23a/Fancl/Pkn2/Chmp2b/Eif2ak4/Fcer2a/Snf8/Cyba/Ppp2r1a/Cav1/Snrpb2/Ptgds/Hspa8/Sqstm1/Ada/Dhx58/Pfn1/Smurf2/Pdk4/Fuca2/Igf1/Pex13/Trim11/Rsad2/Exoc7/Snw1/Traf3/Trim27/Exoc2/Rnase10/Trim35/Ednrb/Acin1/Mtss1/Mylk/Chaf1b/Park2/Eif2ak2/Tap2/Trim26/Osbp/Pcx/Bad/Trim8/Prdx4/Ifitm3/Stat1/Apcs/Atp1b1/Itgav/Snrpb/Zfp639/Anxa5/Adar/Tlr2/Alpk1/Tpst2/Cxcl1/Zc3hav1/Arhgdi…	116
BP	GO:0042787	protein ubiquitination involved in ubiquitin-dependent protein catabolic process	49/4218	150/20432	0.000371504	0.00706743	Trim25/Rmnd5b/Rmnd5a/Btbd2/Pten/Ube2z/Smurf2/Rnf145/Psen1/Sumo3/Rnf185/Rnf144a/Rnf19a/Park2/Axin1/Anks1/Nedd4l/Btbd1/Arih1/Huwe1/Pdcl3/Fbxw7/Ube4b/Klhl7/Ube3b/Cul1/Herc6/Herc2/Cul4b/Wwp2/Abtb2/Cacul1/Cbl/Hectd1/Rnf139/Rnf144b/Mylip/Smurf1/Ube2l3/Stub1/Os9/Arel1/Gm15800/Hecw2/Hectd3/Rnf7/Rnf181/Ptk2b/Rnf217	49
BP	GO:0071826	ribonucleoprotein complex subunit organization	58/4218	185/20432	0.000385137	0.00730193	Kif5b/Lsm2/Rpl10/Rps25/Rps5/Nol3/Ddx39b/Sf3a2/Eral1/Prpf8/Eif5/Mterf3/Noct/Rps14/Prpf19/Clns1a/Mterf4/Snrpb/Eif2a/Adar/Psip1/Srsf10/Mrpl20/Sfswap/Rpl6/Luc7l2/Strap/Mrps11/Rbmx/Pqbp1/Atr/Rpsa/Usp4/Atxn2l/Efl1/Rpl12/Rps19/Ago1/Rps2/Ddx28/Rps10/Txnl4a/Rpl23a/Rpl5/Eif4b/Rpl11/Rpl3/Gemin2/Rps17/Srpk2/Rps15/Lsm14a/Rps28/Rpl13a/Taf9/Snrpe/Rps27/Gm5093	58
BP	GO:0009648	photoperiodism	4218-11-01	19/20432	0.000411402	0.00777355	Nr2f6/Ppp1cc/Ppp1cb/Cry1/Fbxl3/Bhlhe40/Usp2/Fbxl21/Ppp1ca/Trp53/Cry2	11
BP	GO:0019218	regulation of steroid metabolic process	33/4218	91/20432	0.000412973	0.00777696	Lmf1/Cyp17a1/Insig2/Fgfr4/Acadvl/Igf1/Srebf1/Stat5b/Ephx2/Snai2/Stard4/Sf1/Acadl/Bmp2/Il1a/Cyp7a1/Dgat2/Dkk3/Lamtor1/Agt/Apoa5/Bmp5/Igfbp7/Fgf1/Scd1/Bmp6/Stub1/Serpina12/Tspo/Insig1/Agtr1a/Dhcr7/Fdps	33
BP	GO:0031400	negative regulation of protein modification process	134/4218	498/20432	0.000416152	0.00781054	Kat2b/Akt1/Chordc1/Cdkn1b/Dusp3/Bax/Ndrg2/Hspb1/Pard6a/Cav1/Bmp7/Met/Hyal2/Pten/Chp1/Lrrk1/Cnksr3/Gadd45b/Ace2/H2afy/Akap1/Cdk5rap3/Irf1/Fbxo5/Hdac2/Fyn/Dcn/Psen1/Cry1/Igf1/Pbld1/Hmg20b/Rack1/Ube2b/Tnip1/Igfbp3/Pecam1/Slc9a3r1/Nxn/Trim27/Hmgcr/Angpt1/Prkdc/Gsk3b/Cdkn1a/Rgn/Park2/Xdh/Pdpk1/Anks1/Hdac3/Smad4/Gnl3l/Ptprj/Rabgef1/Sirt3/Pdcl3/Abl1/Pax6/Spred1/Pkia/Ptpn1/Adar/Cdkn2c/Podn/Tmem59/P3h1/Hg…	134
BP	GO:0010823	negative regulation of mitochondrion organization	19/4218	43/20432	0.000420422	0.00783354	Akt1/Ier3/Nol3/Igf1/Ppif/Mpv17l/Park2/Rnf41/Lmna/Hgf/Slc35f6/Triap1/Vat1/Tspo/Pid1/Fxn/Trp53/Gpx1/Bnip3	19
BP	GO:0072523	purine-containing compound catabolic process	19/4218	43/20432	0.000420422	0.00783354	Ada/Nudt4/Hint1/Rack1/Pnp/Xdh/Adal/Ahcy/Samhd1/Pde4b/Nudt9/Nudt7/Nt5e/Dpyd/Nudt15/Pde9a/Pde5a/Gda/Aox1	19
BP	GO:0071326	cellular response to monosaccharide stimulus	36/4218	102/20432	0.000422981	0.00783354	Sri/Cacna1e/Kif5b/Igf1/Rack1/Stxbp4/Gpld1/Hmgcr/Slc26a6/Park2/Bad/Map4k4/Gpr39/Mpc2/Ppp3ca/Cyp7a1/Slc2a5/Aacs/Atg7/Nox4/Stx4a/Gas6/Smarca4/Adra2a/Pim3/Sin3a/Pla2g6/Prkce/Gpr68/Kcnb1/Jagn1/Lepr/Gpx1/Hmgn3/Rab11b/Mup1	36
BP	GO:0071331	cellular response to hexose stimulus	36/4218	102/20432	0.000422981	0.00783354	Sri/Cacna1e/Kif5b/Igf1/Rack1/Stxbp4/Gpld1/Hmgcr/Slc26a6/Park2/Bad/Map4k4/Gpr39/Mpc2/Ppp3ca/Cyp7a1/Slc2a5/Aacs/Atg7/Nox4/Stx4a/Gas6/Smarca4/Adra2a/Pim3/Sin3a/Pla2g6/Prkce/Gpr68/Kcnb1/Jagn1/Lepr/Gpx1/Hmgn3/Rab11b/Mup1	36
BP	GO:0031330	negative regulation of cellular catabolic process	29/4218	77/20432	0.000439685	0.00809923	Akt1/Dhx34/Plin5/Atraid/Cdk5rap3/Psen1/Nbas/Gpld1/Rgn/Lrpprc/Anks1/Wac/Bag6/Pdcl3/Dbi/Rgp1/Park7/Dffa/Gabarapl2/Psmf1/Ccar2/Ric1/Ptpn3/Etfbkmt/Acacb/Usp14/Adra1b/Ubxn1/Taf9	29
BP	GO:1901888	regulation of cell junction assembly	27/4218	70/20432	0.000440223	0.00809923	Tek/Cav1/Pten/Ace2/Wdpcp/Cldn1/Snai2/Nedd4l/Ptprj/Epb41l5/Macf1/Arhgap6/Agt/Phldb2/Dapk3/Rcc2/Rhod/S100a10/Fmn1/Gja1/Rap1b/Bcas3/Flot1/Itgb1bp1/Kdr/Clasp1/Rap1a	27
BP	GO:0001525	angiogenesis	116/4218	423/20432	0.000457736	0.00839383	Apoh/Serpinf1/Angptl4/Bax/Aqp1/Hspb1/Gata6/Tek/Ihh/Cav1/Rhoa/Vav2/Pten/Nfe2l2/Stard13/Plcg1/Rspo3/Dcn/Ctgf/E2f7/Rtn4/Pecam1/Wars/Gpld1/Pdcd6/Tert/Fgf9/Mtdh/Angpt1/Myh9/Emp2/Hrg/Robo1/Thbs2/Atp5b/Itgb1/Pdgfa/Nrp2/Pdcl3/Stat1/Cxcr2/Itgav/Il1a/Pdcd10/Enpep/Sema4a/Fbxw7/F3/Hgf/Pdgfra/Anxa3/Ephb4/Adipor2/Tnfrsf1a/Mfge8/Parva/Flna/Vegfd/Fgfr1/Eif2ak3/Adgrg1/Nfatc3/Agt/Ets1/Ctsh/Tgfbr2/Pik3cb/Tie1/Vhl/P…	116
BP	GO:0045923	positive regulation of fatty acid metabolic process	17/4218	37/20432	0.000479871	0.00877097	Pparg/Apoc2/Mid1ip1/Plin5/Avpr1a/Srebf1/Ppara/Rgn/Cpt1a/Acsl5/Slc45a3/Nucb2/Agt/Apoa5/Fabp1/Nr1h2/Mlycd	17
BP	GO:0042542	response to hydrogen peroxide	35/4218	99/20432	0.000487004	0.00880591	Psap/Aqp1/Met/Ppp2cb/Nol3/Nfe2l2/Glrx2/Pcgf2/Hdac2/Rack1/Net1/Ripk1/Glrx/Ppif/Lcn2/Abl1/Pdcd10/Casp6/Txn1/Hgf/Park7/Hsph1/Rps3/Hdac6/Nup93/Foxo3/Rhob/Fabp1/Zfp277/Fxn/Ptk2b/Trp53/Stk24/Gpx1/Bnip3	35
BP	GO:0051000	positive regulation of nitric-oxide synthase activity	4218-09-01	14/20432	0.00048808	0.00880591	Akt1/Fcer2a/Tert/Dhfr/Npr3/Terf2/Gch1/Scarb1/Ptk2b	9
BP	GO:0072350	tricarboxylic acid metabolic process	4218-09-01	14/20432	0.00048808	0.00880591	Idh3g/Cs/Acly/Stat5b/Glud1/Idh1/Idh3b/Aco1/Idh2	9
BP	GO:2000651	positive regulation of sodium ion transmembrane transporter activity	4218-09-01	14/20432	0.00048808	0.00880591	Kif5b/Chp1/Cnksr3/Glrx/Atp1b1/Dnm2/Dmd/Plcb1/Ank3	9
BP	GO:0030433	ER-associated ubiquitin-dependent protein catabolic process	26/4218	67/20432	0.000499728	0.00898707	Sdf2/Psmc3/Jkamp/Derl3/Ube2g2/Derl2/Hsp90b1/Erlec1/Rnf185/Psmc5/Tor1a/Vcp/Stt3b/Pomt2/Trim13/Edem2/Pomt1/Wfs1/Os9/Usp14/AI314180/Rnf103/Ubxn8/Sec61b/Fbxo6/Ccdc47	26
BP	GO:0006739	NADP metabolic process	16/4218	34/20432	0.000502799	0.00901332	Shpk/Hsd11b1/Fdxr/Tkt/Nadk2/Nnt/Taldo1/Pgd/H6pd/Nadk/Idh2/Me1/Cyb5r4/Aspdh/Fmo2/Rpia	16
BP	GO:0090322	regulation of superoxide metabolic process	13/4218	25/20432	0.000506545	0.00905146	Cyba/Nfe2l2/Aatf/Dhfr/Rgn/Park7/Cxcl1/Pon3/Agt/Gch1/Crp/Il18/Agtr1a	13
BP	GO:0001558	regulation of cell growth	105/4218	378/20432	0.000508354	0.00905485	Pparg/Acvr1b/Sema6b/Rnd2/Akt1/Hdgfrp2/Cdkn1b/Rab11a/Eif4g2/Cyba/Rhoa/Clstn3/Hyal2/Sgk2/Derl2/Cxcl16/Ddx39b/Sgk1/Ctgf/Igf1/Supv3l1/Avpr1a/Rab21/Rack1/Pttg1/Igfbp3/Rtn4/Gsk3b/Hrg/Cdkn1a/Park2/Smad4/Nedd4l/Smarca2/Sema4g/Ptprj/Aatk/Sgk3/Serpine2/Cdc73/Adipor1/Abl1/F2/Zfp639/Sema4a/Cth/Epha7/Cdkn2c/Cda/Slc25a33/Mtor/Mad2l2/Cd38/Apbb2/Rufy3/Ulk1/Limk1/Adipor2/Rerg/Caprin2/Arhgap4/Agt/Pin1/Smarca4/Rpl4…	105
BP	GO:0032868	response to insulin	58/4218	187/20432	0.000521489	0.00925933	Cav2/Pparg/Kat2b/Akt1/Cdk4/Retn/Cad/Slc2a4/Pdk4/Sgk1/Cry1/Eif4ebp2/Srebf1/Stxbp4/Rab10/Gpld1/Ppara/Prkdc/Pdpk1/Mzb1/Rbp4/Baiap2/Cpeb1/Hadha/Stat1/Scly/Adipor1/Parp1/Ptpn1/Stxbp3/Ybx1/Pik3r3/Slc25a33/Mtor/Nucb2/Slc27a1/Agt/Sesn3/Enpp1/Prkci/Egr2/H2afz/Dennd4c/Pdk2/Ncoa5/Appl1/Pklr/Pik3r1/Serpina12/Pcsk9/Pid1/Prkca/Plcb1/Rab31/Cry2/Sort1/Srsf3/Ggh	58
BP	GO:0006486	protein glycosylation	61/4218	199/20432	0.000534811	0.00943595	Kat2b/Sdf2/Lmf1/Man1a/Derl3/Ube2g2/Chp1/Slc35c2/Psen1/Mgat1/Galnt10/Fut8/Trim23/Pmm2/St3gal6/Parp3/Parp1/Dpm2/Vcp/St3gal3/Tmem59/Extl1/Mogs/Rpn1/Art4/Magt1/B3gnt3/St3gal4/Stt3a/Stt3b/Engase/Pomt2/Ramp1/Tmem5/Eogt/Ggta1/Alg12/Parp2/Mgat5/Pomk/A4gnt/Hpf1/Edem2/B3galnt2/Pomt1/Alg1/Alg2/Pum3/C1galt1/Krtcap2/Ispd/Dpy19l3/C1galt1c1/Ccdc126/B3galt6/Ces2a/St3gal5/Pgm3/Parp10/Alg6/St6galnac4	61
BP	GO:0043413	macromolecule glycosylation	61/4218	199/20432	0.000534811	0.00943595	Kat2b/Sdf2/Lmf1/Man1a/Derl3/Ube2g2/Chp1/Slc35c2/Psen1/Mgat1/Galnt10/Fut8/Trim23/Pmm2/St3gal6/Parp3/Parp1/Dpm2/Vcp/St3gal3/Tmem59/Extl1/Mogs/Rpn1/Art4/Magt1/B3gnt3/St3gal4/Stt3a/Stt3b/Engase/Pomt2/Ramp1/Tmem5/Eogt/Ggta1/Alg12/Parp2/Mgat5/Pomk/A4gnt/Hpf1/Edem2/B3galnt2/Pomt1/Alg1/Alg2/Pum3/C1galt1/Krtcap2/Ispd/Dpy19l3/C1galt1c1/Ccdc126/B3galt6/Ces2a/St3gal5/Pgm3/Parp10/Alg6/St6galnac4	61
BP	GO:0006260	DNA replication	73/4218	247/20432	0.000537843	0.0094596	Nfix/Ccne1/Mcm2/Calr/Dnaja3/Mcm5/Pole/Met/Cdk9/Ehmt2/Cacybp/Igf1/E2f7/Hus1/Pold2/Rrm2/Recql5/Ctc1/Wrnip1/Chaf1b/Atf1/Parp3/Peo1/Poll/Pdgfa/Stag2/Prim2/Mcm6/Parp1/Mcm8/Gins1/Rtfdc1/Pdgfc/Fbxw7/Ccne2/Tex10/Nfia/Rpa2/Slc25a33/Pds5a/Pdgfra/Rfc5/Ing4/Blm/Rrm1/Fgfr1/Gins2/Mre11a/Bmp5/Atr/Adra2a/Recql4/Rfc3/Ino80/Parp2/Dtl/Primpol/Slx4/Tspyl2/Wapl/Mcm3/Sin3a/Pura/Pid1/Mms22l/E2f8/Chtf8/Nfic/Npm1/Rbbp4/U…	73
BP	GO:0006354	DNA-templated transcription, elongation	23/4218	57/20432	0.000542064	0.00950397	Tcea3/Gtf2f1/Elof1/Ddx39b/Supt4a/Supt4b/Recql5/Elp3/Brd4/Axin1/Nelfe/Iws1/Cdc73/Tceb3/Ccar2/Tcea1/Thoc5/Tceanc/Thoc7/Ercc6/Tceb2/Wdr61/Ell	23
BP	GO:0045444	fat cell differentiation	66/4218	219/20432	0.00054468	0.00951999	Pparg/Fndc5/Fbxo9/Akt1/Grk5/Steap4/Retn/Slc2a4/Igf1/Wif1/Srebf1/Id4/Gdf10/Stk3/Snai2/Gsk3b/Noct/Axin1/Psmb8/Lamb3/Nr4a2/Mkks/Bmp2/E2f1/Mtor/Sdf4/Ncor2/Pex11a/Nucb2/Tgfb1i1/Hdac6/Adrb3/Eif2ak3/Bbs2/Nudt7/Scd1/Mex3c/4932438A13Rik/Enpp1/Egr2/Atf5/Metrnl/Tmem120a/Zc3h12a/Tmem64/Zbtb7c/Insig1/Arl4a/Angptl8/Zfpm1/Plcb1/Gdf6/Mapk14/Tmem120b/Lrrc8c/Arntl/Per2/Fto/Adgrf5/Gpx1/Sort1/Selenbp1/Ccnd1/Bscl2/Bn…	66
BP	GO:0006888	ER to Golgi vesicle-mediated transport	29/4218	78/20432	0.000563454	0.00978696	Lman2l/Ergic1/Lmf1/Use1/Scfd1/Vti1b/Spast/Copa/Sec23b/Vcp/Rint1/Htt/Stx18/Nrbp1/Trappc4/Zw10/Trappc8/Mia2/Sec24a/Rnf139/Creb3l2/Lman1/Insig1/Whamm/Trappc1/Sorl1/Cope/Sec22c/Cnih4	29
BP	GO:1903729	regulation of plasma membrane organization	29/4218	78/20432	0.000563454	0.00978696	Itga3/Akt1/Rab11a/Tmbim1/Kif5b/Sptbn1/Rack1/Stx8/Vti1b/Nkd2/Pdpk1/Pkdcc/Itgb1/Lypla1/Tmem59/Plekhm2/Arhgef16/Stx4a/Acsl3/Dnm2/Hectd1/Sh3glb1/Prkci/Cnst/Appl1/Pik3r1/Pid1/Vamp8/Lrrc15	29
BP	GO:0009124	nucleoside monophosphate biosynthetic process	27/4218	71/20432	0.000572189	0.00990791	Atp5f1/Tcirg1/Atp5d/Slc25a13/Ada/Atp5g3/Atp6v0a1/Umps/Park2/Atp5b/Prps2/Tyms/Atp5c1/Dut/Ampd2/Vcp/Ak2/Ppat/Paics/Gbas/Atp5l/Pklr/Pid1/Chchd10/Atp5k/Impdh2/ATP6	27
BP	GO:0051607	defense response to virus	78/4218	268/20432	0.000589837	0.010182	Trim25/Mx1/Il12rb1/Tmem39a/Fancl/Eif2ak4/Snrpb2/Hyal2/Serinc3/Dhx58/Irf1/Pdk4/Pex13/Trim11/Rsad2/Traf3/Bnip3l/Acin1/Mtss1/Mylk/Chaf1b/Ifnar2/Eif2ak2/Ifitm3/Atp1b1/Ifih1/Snrpb/Zbp1/Samhd1/Anxa5/Adar/Alpk1/Cxcl9/Irf5/Zc3hav1/Kcnj8/Atg7/Itgax/Car7/Nlrx1/Nup93/Traf3ip1/Tkfc/Ifit1/Cd207/Cxcl10/Becn1/Isg15/Cox8a/Fam13b/Mbd5/Unc93b1/Spon2/Ddx60/Polr3k/Smurf1/Supt3/Isg20/Zfp189/Stat2/Ddx58/Oasl1/Pm20d1/T…	78
BP	GO:0051168	nuclear export	43/4218	130/20432	0.000613902	0.0105648	Emd/Calr/Chp1/Ddx39b/Xpo1/Dnajc27/Nemf/Ppm1a/Nup153/Rangap1/Gsk3b/Iws1/Hdac3/Txn1/Nol6/Srsf10/Park7/Ran/Gas6/Rpsa/Nup93/Ddx19b/Chchd4/Thoc5/Nxt1/Egr2/Camk4/Smurf1/Nup133/Cchcr1/Nup88/Nup107/Styx/Thoc7/Npm1/Rps15/Akap13/Frat1/Strada/Wipf1/Zc3h3/BC005561/Rasl2-9	43
BP	GO:0097191	extrinsic apoptotic signaling pathway	68/4218	228/20432	0.000622193	0.0106746	Acvr1b/Bax/Wwox/Tmbim1/Ppp2r1a/Cav1/Hyal2/Faf1/Pten/Nol3/Erbb3/Fyn/Igf1/Mknk2/Ripk1/Tert/Itm2b/Stk3/Snai2/Gsk3b/Krt18/Pdpk1/Fas/Bad/Rnf41/Agap2/Rb1cc1/Sgk3/Bok/Lcn2/Itgav/Pdia3/Il1a/Rbck1/Skil/Lmna/Gclm/Hgf/Park7/Htt/Tnfrsf1a/Stx4a/Fgfr1/Jak3/Agt/Gclc/Faim/Dapk3/Parp2/Serpine1/Tnfrsf23/Ctnna1/Il18/Thbs1/Ppp1ca/Madd/Inhba/Pik3r1/Foxo3/Krt8/Fgfr3/Bloc1s2/Bak1/Gpx1/Htra2/Sort1/Tnfsf12/Bcl2a1a	68
BP	GO:1901652	response to peptide	83/4218	289/20432	0.000632092	0.0108113	Cav2/Pparg/Kat2b/Akt1/Cdk4/Cav1/Retn/Cad/Cacybp/Slc2a4/Irf1/Pdk4/Sgk1/Cry1/Igf1/Eif4ebp2/Avpr1a/Srebf1/Stxbp4/Rab10/Stat5b/Gpld1/Ppara/Rangap1/Cyc1/Prkdc/Pdpk1/Mzb1/Rbp4/Baiap2/Cpeb1/Hadha/Stat1/Scly/Adipor1/Parp1/Nr4a2/Gatm/Ptpn1/Car2/Anxa5/Stxbp3/Aldob/Ybx1/Eif2b3/Pik3r3/Slc25a33/Mtor/Eif2b1/Irf5/Nucb2/Slc27a1/Agt/Sesn3/Hcrtr2/Cdo1/Mbd5/Enpp1/Prkci/Egr2/H2afz/Dennd4c/Pdk2/Il18/Ncoa5/Appl1/Pklr/…	83
BP	GO:0032535	regulation of cellular component size	98/4218	351/20432	0.000635306	0.0108133	Sema6b/Rnd2/Akt1/Aqp1/Rab11a/Wdr1/Eif4g2/Snf8/Cdk4/Rhoa/Pten/Capza2/Eps8/Dstn/Slc12a7/Pfn1/Wasf1/Rab21/Actr2/Sptbn1/Rtn4/Pecam1/Slc9a3r1/Hsp90aa1/Trim27/Carmil1/Rasa1/Jmy/Gsk3b/Hcls1/Lima1/Hsp90ab1/Sema4g/Baiap2/Aatk/Clns1a/Cdhr5/Rptor/Rb1cc1/Abl1/Neb/Mkks/Sema4a/Epha7/Hp1bp3/Sh3bgrl3/Mtor/Rufy3/Ulk1/Limk1/Lmod2/Slc6a12/Atp2b2/Pex11a/Coro1a/Aqp8/Arhgap4/Tpm1/Rpl4/Nck1/Ryk/Ppp1r9a/Dnm2/Brk1/Fhod3/…	98
BP	GO:0061136	regulation of proteasomal protein catabolic process	44/4218	134/20432	0.000636074	0.0108133	Akt1/Dlgap1/Rad23a/Rnf114/Ubqln4/Ubb/Psen1/Rhbdf1/Rack1/Rnf144a/Nkd2/Psme1/Rnf19a/Gsk3b/Park2/Axin1/Wac/Rnf138/Bag6/Btrc/Arih1/Fbxw7/Vcp/Park7/Atg7/Rnf40/Gabarapl2/Gclc/Trib1/Psmf1/Rnf125/Ccar2/Prickle1/Rnf144b/Stub1/Ufl1/Rfwd2/Usp14/Zfand2a/Rnf217/Gpx1/Ddrgk1/Ubxn1/Taf9	44
BP	GO:0019363	pyridine nucleotide biosynthetic process	4218-10-01	17/20432	0.000640837	0.0108284	Haao/Nadk2/Nadk/Idh2/Qprt/Nadsyn1/Nmnat3/Nmrk1/Aspdh/Kmo	10
BP	GO:0090201	negative regulation of release of cytochrome c from mitochondria	4218-10-01	17/20432	0.000640837	0.0108284	Akt1/Nol3/Igf1/Ppif/Park2/Lmna/Hgf/Triap1/Fxn/Gpx1	10
BP	GO:1903052	positive regulation of proteolysis involved in cellular protein catabolic process	33/4218	93/20432	0.000645712	0.0108779	Akt1/Rnf114/Pten/Psen1/Sumo3/Rack1/Rnf144a/Nkd2/Rnf19a/Gsk3b/Rgn/Park2/Axin1/Rnf138/Arih1/Fbxw7/Vcp/Atg7/Ctsc/Rnf40/Gclc/Trib1/Rnf125/Prickle1/Rnf139/Rnf144b/Smurf1/Stub1/Rfwd2/Zfand2a/Ptk2b/Rnf217/Ddrgk1	33
BP	GO:0010765	positive regulation of sodium ion transport	18/4218	41/20432	0.000651002	0.0108848	Akt1/Kif5b/Chp1/Cnksr3/Sgk2/Sgk1/Glrx/Nedd4l/Sgk3/Atp1b1/Gnas/Cxcl1/Prss8/Dnm2/Fxyd1/Dmd/Plcb1/Ank3	18
BP	GO:1990542	mitochondrial transmembrane transport	18/4218	41/20432	0.000651002	0.0108848	Timm44/Tomm40/Tomm40l/Mcu/Timm23/Timm9/Hsp90aa1/Micu2/Tomm22/Grpel2/Timm21/Mpc2/Timm10/Slc25a33/Timm17b/Chchd4/Slc25a23/Tomm20	18
BP	GO:0046823	negative regulation of nucleocytoplasmic transport	26/4218	68/20432	0.00065196	0.0108848	Emd/Sri/Rab23/Faf1/Chp1/Akap1/Pbld1/Slc9a3r1/Ppm1a/Nup153/Angpt1/Rangap1/Snai2/Gsk3b/Hdac3/Pkia/Txn1/Dyrk2/Park7/Mtor/Gas6/Uaca/Zc3h12a/Ei24/Parp10/Nlrp12	26
BP	GO:0010883	regulation of lipid storage	17/4218	38/20432	0.000702595	0.0116606	Pparg/Plin5/Lpl/Fitm1/Ppara/Srebf2/Ehd1/Itgav/Scarb1/Crp/Acacb/Zc3h12a/Hilpda/Fitm2/Fto/Nr1h2/Mup1	17
BP	GO:0019674	NAD metabolic process	17/4218	38/20432	0.000702595	0.0116606	Haao/Idh3g/Mdh2/Nadk2/Gpd2/Idh3b/Aldob/Vcp/Nadk/Ldhb/Qprt/Nadsyn1/Nmnat3/Aspdh/Kmo/Trp53/Ldha	17
BP	GO:0009743	response to carbohydrate	49/4218	154/20432	0.000726072	0.0119791	Sri/Cacna1e/Kif5b/Igf1/Rack1/Srebf1/Stxbp4/Gpld1/Hmgcr/Slc26a6/Rps6ka2/Park2/Bad/Map4k4/Gpr39/Glul/Mpc2/P2rx3/Casp6/Ppp3ca/Cyp7a1/Eif2b3/Slc2a5/Eif2b1/Aacs/Gys2/Atg7/Nox4/Stx4a/Gas6/Smarca4/Adra2a/Pim3/Nr0b2/Thbs1/Sin3a/Pla2g6/Prkce/Gpr68/Kcnb1/Prkca/Plcb1/Jagn1/Lepr/Calcrl/Gpx1/Hmgn3/Rab11b/Mup1	49
BP	GO:0034329	cell junction assembly	49/4218	154/20432	0.000726072	0.0119791	Rhoc/Pkn2/Wdr1/Tek/Cav1/Rhoa/Pten/Actn1/Ace2/Wdpcp/Marveld2/Ocln/Cldn1/Plec/Snai2/Pdpk1/Lama3/Nedd4l/Ptprj/Itgb1/Epb41l5/Itgav/Pip5k1a/Tln1/Macf1/Arhgap6/Cdh5/Agt/Phldb2/Dapk3/Fermt2/Ctnna1/Rcc2/Cldn5/Rhod/S100a10/Fmn1/Whamm/Gjb2/Gja1/Prkca/Rap1b/Bcas3/Ptk2b/Flot1/Itgb1bp1/Kdr/Clasp1/Rap1a	49
BP	GO:0071897	DNA biosynthetic process	43/4218	131/20432	0.000733927	0.0120731	Pparg/Pnkp/Fgfr4/Pole/Cct4/Map3k4/Ddx39b/Ctgf/Sycp3/Ten1/Ctc1/Wrnip1/Tert/Hmbox1/Cct5/Gsk3b/Cdkn1a/Rgn/Poll/Gnl3l/Tk1/Cct8/Nek7/Nop10/Vcp/Hgf/Rfc5/Nox4/Terf2/Chek1/Atr/Rfc3/Dtl/Primpol/Gfer/Prkd2/Gja1/Ptk2b/Trp53/Hnrnpc/Tcp1/Spata22/Gdf2	43
BP	GO:0043502	regulation of muscle adaptation	27/4218	72/20432	0.000737545	0.0120968	Cdk9/Nol3/Gtf2ird2/Akap1/Ddx39b/Igf1/Fbxo32/Gsk3b/Gtf2ird1/Smad4/Parp1/Ppp3ca/Errfi1/Mtor/Mef2a/Glrx3/Agt/Pin1/Hand2/Jarid2/Pde9a/Prkca/Pde5a/Ece1/Fdps/Tnnt1/Akap13	27
BP	GO:0009067	aspartate family amino acid biosynthetic process	4218-11-01	20/20432	0.000744018	0.0120968	Mri1/Apip/Adi1/Mthfd1/Got1/Aasdhppt/Asnsd1/Cth/Mthfr/Got2/Bhmt	11
BP	GO:0010884	positive regulation of lipid storage	4218-11-01	20/20432	0.000744018	0.0120968	Plin5/Lpl/Fitm1/Srebf2/Ehd1/Scarb1/Acacb/Zc3h12a/Hilpda/Fitm2/Nr1h2	11
BP	GO:0045648	positive regulation of erythrocyte differentiation	4218-11-01	20/20432	0.000744018	0.0120968	Acvr1b/Stat5b/Smap1/Ets1/Ankrd54/Isg15/Kdm1a/Inhba/Foxo3/Acvr2a/Mapk14	11
BP	GO:0009069	serine family amino acid metabolic process	16/4218	35/20432	0.000749977	0.0121583	Mthfd1/Dhfr/Gldc/Shmt2/Agxt/Ahcy/Gclm/Cth/Gclc/Amt/Gcsh/Fam206a/Baat/Sephs2/Thnsl2/Mpst	16
BP	GO:0000209	protein polyubiquitination	52/4218	166/20432	0.000763918	0.0123485	Hltf/Rnf114/Ube2g2/Ube2a/Rnf145/Ube2b/Rnf144a/Trim27/Ube2e1/Rnf19a/Sharpin/March5/Park2/Axin1/Rnf138/Nedd4l/Prpf19/Btrc/Arih1/Huwe1/Rnf41/Nmi/Rbck1/Ube4b/Anapc4/Mkrn1/Rnf40/Hdac6/Cbfb/Wwp2/Birc3/Rnf125/Ube2f/Hectd1/Topors/Rnf139/Dtl/Rnf144b/Smurf1/Ube2l3/March6/Stub1/Ttc3/Rnf152/Rnf181/Ube2e2/Ube4a/Parp10/Rnf217/Cdc26/Ube2u/Ube2d3	52
BP	GO:0038066	p38MAPK cascade	15/4218	32/20432	0.000789378	0.0127233	Nr2c2/Met/Map3k4/Gadd45b/Xdh/Bmp2/Hgf/Hsph1/Gadd45a/Hand2/Zc3h12a/Phlpp1/Gdf6/Mapk14/Fgfr3	15
BP	GO:0046834	lipid phosphorylation	4218-12-01	23/20432	0.000801691	0.0128477	Efr3b/Impa2/Pi4k2a/Impa1/Agk/Pik3c2g/Pik3cb/Ip6k2/Pi4kb/Pik3cd/Pi4ka/Tmem150a	12
BP	GO:0097576	vacuole fusion	4218-12-01	23/20432	0.000801691	0.0128477	Snapin/Ubqln4/Phf23/Vps16/Vcp/Vps33a/Snx14/Epg5/Vps41/Lix1l/Vamp8/Tecpr1	12
BP	GO:0006984	ER-nucleus signaling pathway	14/4218	29/20432	0.000815748	0.0130357	Insig2/Nfe2l2/Gsk3b/Ptpn1/Eif2a/Lmna/Eif2ak3/Nck1/Tmem33/Wfs1/Insig1/Trp53/Nck2/Ccdc47	14
BP	GO:0036473	cell death in response to oxidative stress	28/4218	76/20432	0.000822312	0.0131031	Psap/Hspb1/Met/Nol3/Nfe2l2/Rack1/Ripk1/Glrx/Park2/Parp1/Pdcd10/Fbxw7/Txn1/Hgf/Park7/Hsph1/Hdac6/Nup93/Uaca/Tbc1d24/Vnn1/Gfer/Foxo3/Rnf7/Zfp622/Trp53/Stk24/Gpx1	28
BP	GO:0051051	negative regulation of transport	127/4218	476/20432	0.000825499	0.0131165	Comt/Pparg/Vpreb3/Akt1/Emd/Apoc2/Sri/Ier3/Gstm7/Cnn2/Rab23/Crbn/Cav1/Derl3/Ube2g2/Faf1/Pten/Chp1/Nol3/Pacsin2/Ada/Erbb3/Akap1/Derl2/Cry1/Pbld1/Srgn/Rhbdf1/Erlec1/Rack1/Srebf1/Rsad2/Slc9a3r1/Ppm1a/Trim27/Nup153/Hmgcr/Ppif/Angpt1/Rangap1/Srebf2/Snai2/Mpv17l/Gsk3b/Park2/Pkdcc/Mzb1/Ndfip1/Hdac3/Nedd4l/Gsto1/Rabgef1/Rptor/Lypla1/Map4k4/Pnkd/Serpine2/Gpr39/Parp1/Fcgr2b/Itgav/Pkia/Gnas/Anxa5/Stxbp3/Hadh…	127
BP	GO:0042632	cholesterol homeostasis	26/4218	69/20432	0.000843141	0.0132836	Fgfr4/Cav1/Pla2g12b/Abca1/Lpl/Npc2/Ephx2/Srebf2/Gpihbp1/Ehd1/Gpr39/Ampd2/Cyp7a1/Dgat2/Lamtor1/Apoa5/Ldlr/Lipc/Lcat/Mia2/Sec24a/Tmem97/Scarb1/Mylip/Pcsk9/Nr1h2	26
BP	GO:0055092	sterol homeostasis	26/4218	69/20432	0.000843141	0.0132836	Fgfr4/Cav1/Pla2g12b/Abca1/Lpl/Npc2/Ephx2/Srebf2/Gpihbp1/Ehd1/Gpr39/Ampd2/Cyp7a1/Dgat2/Lamtor1/Apoa5/Ldlr/Lipc/Lcat/Mia2/Sec24a/Tmem97/Scarb1/Mylip/Pcsk9/Nr1h2	26
BP	GO:1903076	regulation of protein localization to plasma membrane	26/4218	69/20432	0.000843141	0.0132836	Itga3/Akt1/Rab11a/Tmbim1/Kif5b/Sptbn1/Rack1/Stx8/Vti1b/Nkd2/Pdpk1/Pkdcc/Itgb1/Lypla1/Tmem59/Arhgef16/Stx4a/Acsl3/Hectd1/Prkci/Cnst/Appl1/Pik3r1/Pid1/Vamp8/Lrrc15	26
BP	GO:0046824	positive regulation of nucleocytoplasmic transport	38/4218	113/20432	0.00086973	0.013664	Emd/Tek/Dmap1/Hyal2/Igf1/Ppm1a/Hsp90aa1/Bmpr1a/Gsk3b/Hcls1/Hsp90ab1/Bambi/Hdac3/Smad4/Parp1/Rbck1/Tlr2/Ppp3ca/Tnfrsf1a/Chp2/Flna/Gas6/Rbpms/Nup93/Ppp3r1/Uaca/Camk4/Bmp6/Tlr4/Il18/Ddx58/Pik3r1/Zc3h12a/Tlr7/Mapk14/Erbb4/Wipf1/Nlrp12	38
BP	GO:0043123	positive regulation of I-kappaB kinase/NF-kappaB signaling	44/4218	136/20432	0.000899545	0.0140929	Trim25/Rhoc/Tmed4/Gprc5b/Fyn/Ppm1a/Ripk1/Mtdh/Sharpin/Tfg/Park2/Ndfip1/Trim8/Shisa5/Nek6/Abl1/Slc20a1/Il1a/Rbck1/Tlr2/Cth/Lurap1/Zc3hav1/Zdhhc13/Flna/Atp2c1/Ubd/Trim13/Tgm2/Tlr4/Il18/S100a13/Tlr7/Prkce/Cxxc5/Gja1/Ndfip2/Eef1d/Tnip2/Tnfrsf19/Akap13/Lgals1/Ddrgk1/Nlrp12	44
BP	GO:0016311	dephosphorylation	95/4218	342/20432	0.000911613	0.014242	Dlg3/Ocrl/Pnkp/Dusp3/Ppp1cc/Nsmf/Ppp2r1a/Ppp2cb/Pten/Chp1/Ppp1cb/Mtmr4/Akap1/Ctdnep1/Cdk5rap3/Hsp90b1/Ppm1m/Ppm1d/Ppm1a/Plpp1/Mtmr6/Ephx2/Rbm26/Rcan1/Rgn/Synj2/Pkmyt1/Hsp90ab1/Csnk2b/Impa2/Btrc/Ptprj/Farp1/Ppp1r42/Ppp1r7/Spred1/Bmp2/Impa1/Ptpn1/Nceh1/Ppm1l/Ppp3ca/Alpl/Ptpn12/Ptpru/Ssu72/Htt/Ankle2/Ppp4c/Chp2/Lhpp/Igbp1/Ptpn7/Pin1/Ptpn9/Nck1/Cdc25a/Acpp/Ppp3r1/Cd300a/Myo1d/Tmem55b/Ppp6r2/Ppp1r14a/…	95
BP	GO:0090199	regulation of release of cytochrome c from mitochondria	18/4218	42/20432	0.000921411	0.014355	Akt1/Bax/Nol3/Bik/Igf1/Ppif/Park2/Fas/Bad/Lmna/Hgf/Triap1/Pla2g6/Bak1/Fxn/Trp53/Gpx1/Bnip3	18
BP	GO:0007044	cell-substrate junction assembly	27/4218	73/20432	0.000943087	0.0146519	Tek/Pten/Actn1/Wdpcp/Plec/Pdpk1/Lama3/Ptprj/Epb41l5/Itgav/Pip5k1a/Tln1/Macf1/Arhgap6/Phldb2/Dapk3/Fermt2/Rcc2/Rhod/S100a10/Fmn1/Whamm/Bcas3/Ptk2b/Itgb1bp1/Kdr/Clasp1	27
BP	GO:0015931	nucleobase-containing compound transport	47/4218	148/20432	0.000963713	0.0149309	Slc25a42/Khsrp/Slc35c2/Slc35b4/Ddx39b/Slc29a3/Xpo1/Pnpt1/Slc35b1/Nup153/Ripk1/Slc25a17/Ncbp2/Srsf7/Lrpprc/Iws1/Cpeb1/Ahctf1/Nol6/Slc35d1/Srsf10/Slc25a33/Htt/G3bp2/Rpsa/Nup93/Ddx19b/Thoc5/Aaas/Nxt1/Nup133/Nup88/Adora1/Tst/Slc25a23/Gja1/Nup107/Thoc7/Npm1/Hnrnpa3/Flot1/Qk/Nupl1/Srsf3/Zc3h3/BC005561/Tomm20	47
BP	GO:2001233	regulation of apoptotic signaling pathway	102/4218	372/20432	0.000976961	0.0150637	Eef1e1/Akt1/Prkra/Ier3/Bax/Wwox/Hspb1/Tmbim1/Ppp2r1a/Cav1/Pttg1ip/Hyal2/Faf1/Pten/Nol3/Nfe2l2/Bik/Serinc3/Pcgf2/Ubb/Hdac2/Fyn/Psen1/Igf1/Rack1/Slc9a3r1/Ripk1/Tert/Ppif/Stk3/Snai2/Mpv17l/Gsk3b/Park2/Fas/Bad/Ankrd2/Agap2/Rb1cc1/Sgk3/Parp1/Bmi1/Nr4a2/Itgav/Pdia3/Rbck1/Ptpn1/Skil/Lmna/Fbxw7/Gclm/Cth/Hgf/Park7/Cdk11b/Htt/Slc35f6/Triap1/Hsph1/Ctsc/Rps3/Stx4a/Pgap2/Igbp1/Fgfr1/Eif2ak3/Jak3/Agt/Gclc/Ctsh…	102
BP	GO:0009411	response to UV	41/4218	125/20432	0.00097767	0.0150637	Akt1/Bax/Aqp1/Eif2ak4/Hyal2/Map3k4/Ube2a/Trove2/Ube2b/Hus1/Yy1/Cdkn1a/Ercc3/Fech/Casp7/Rhbdd1/Xpa/Usp1/Ube4b/Sdf4/Triap1/Xpc/Cul4b/Chek1/Usp28/Atr/Cdc25a/Ccar2/Ino80/Uaca/Kdm1a/Dtl/Primpol/Pik3r1/Bcl3/Ercc6/Bak1/Trp53/Ei24/Gpx1/Ccnd1	41
BP	GO:0006120	mitochondrial electron transport, NADH to ubiquinone	4218-09-01	15/20432	0.000996607	0.0151552	Ndufs6/Ndufb9/Ndufb8/Ndufa10/Park7/Ndufa7/Bdnf/ND2/ND4	9
BP	GO:0006999	nuclear pore organization	4218-09-01	15/20432	0.000996607	0.0151552	Rtn4/Nup153/Ahctf1/Tmem170/Nup93/Tmem33/Nup205/Nup133/Nup107	9
BP	GO:0046794	transport of virus	4218-09-01	15/20432	0.000996607	0.0151552	Cav2/Cav1/Ddx39b/Tap2/Eps15/Thoc5/Tap1/Bst2/Thoc7	9
BP	GO:0051004	regulation of lipoprotein lipase activity	4218-09-01	15/20432	0.000996607	0.0151552	Apoh/Lmf1/Angptl4/Apoc2/Gpihbp1/Apoa5/Angptl8/Nr1h2/Sort1	9
BP	GO:0043112	receptor metabolic process	49/4218	156/20432	0.000997158	0.0151552	Pparg/Gria3/Cav1/Ace2/Fnta/Hdac2/Psen1/Fut8/Lgmn/Angpt1/Ppara/Ehd3/Capn1/Itgb1/Cxcr2/Itgav/Ptpn1/Chmp5/Eps15/Nsg1/Ulk1/Lamtor1/Hdac6/Trappc4/Arap1/Dnm2/Nsf/Ramp1/Becn1/Plekhj1/Sec24a/Sh3glb1/Mylip/Snx25/Smurf1/Lmtk2/Grk3/Gprasp1/Pcsk9/Dmd/Agtr1a/Grk4/Rab31/Ece1/Dtnbp1/Calcrl/Flot1/Scyl2/Rab11b	49
BP	GO:0071241	cellular response to inorganic substance	37/4218	110/20432	0.00100439	0.0151969	Pparg/Hnrnpd/Cdkn1b/Fosb/Aqp1/Cyp2a5/Atp7b/Slc41a1/Krt10/Fos/Gpld1/Ppif/Mylk/Hrg/Fas/Nptx1/Slc40a1/Gpr39/Blm/Mef2a/Fus/Chp2/Nfatc3/Cyp1a2/Rasgrp2/Syt1/Clic4/Crp/Bmp6/Thbs1/Slc25a23/Junb/Alox5ap/B2m/Ank3/Bnip3/Prnp	37
BP	GO:0050792	regulation of viral process	82/4218	289/20432	0.00100715	0.0151969	Cav2/Trim25/Il12rb1/Tmem39a/Rad23a/Fancl/Pkn2/Chmp2b/Eif2ak4/Snf8/Snrpb2/Hspa8/Dhx58/Pfn1/Pdk4/Pex13/Trim11/Rsad2/Snw1/Traf3/Trim27/Trim35/Acin1/Mtss1/Mylk/Chaf1b/Park2/Eif2ak2/Tap2/Trim26/Pcx/Trim8/Ifitm3/Stat1/Apcs/Atp1b1/Snrpb/Zfp639/Anxa5/Adar/Alpk1/Zc3hav1/Car7/Mre11a/Nlrx1/Smarca4/Nup93/Hacd3/Traf3ip1/Tkfc/Ifit1/Trim13/Isg15/Cox8a/Fam13b/Mbd5/Tap1/Ddx60/Smurf1/Supt3/Isg20/Zfp189/Stat2/Ddx58…	82
BP	GO:0009066	aspartate family amino acid metabolic process	17/4218	39/20432	0.00100806	0.0151969	Gnmt/Mri1/Apip/Adi1/Mthfd1/Got1/Aasdhppt/Asnsd1/Ahcy/Cth/Mthfr/Aass/Got2/Nmnat3/Aspg/Ddo/Bhmt	17
BP	GO:0030010	establishment of cell polarity	38/4218	114/20432	0.00104869	0.0157622	Spag5/Myo9b/Pard6a/Cyth1/Syne4/Wdpcp/Rab10/Slc9a3r1/Myh9/Gsk3b/Gbf1/Rnf41/Kif26b/Pax6/Lmna/Htt/Rufy3/Exoc4/Frmd4b/Sipa1l3/Nek3/Cdh5/Zw10/Map4/Spry1/Prkci/Cdk5rap2/Mcph1/Wdr81/Insc/Gja1/Rap1b/Cfl1/Bcas3/Ptk2b/Cyp26b1/Clasp1/Spdl1	38
BP	GO:0006995	cellular response to nitrogen starvation	4218-07-01	10/20432	0.00105401	0.0157622	Rb1cc1/Map1lc3a/Gabarapl1/Atg7/Map1lc3b/Gabarapl2/Becn1	7
BP	GO:0043562	cellular response to nitrogen levels	4218-07-01	10/20432	0.00105401	0.0157622	Rb1cc1/Map1lc3a/Gabarapl1/Atg7/Map1lc3b/Gabarapl2/Becn1	7
BP	GO:0009615	response to virus	86/4218	306/20432	0.00105889	0.015793	Trim25/Mx1/Il12rb1/Tmem39a/Fancl/Eif2ak4/Snrpb2/Rps15a/Hyal2/Serinc3/Dhx58/Irf1/Pdk4/Pex13/Trim11/Rsad2/Traf3/Bnip3l/Acin1/Mtss1/Mylk/Chaf1b/Ifnar2/Eif2ak2/Bad/Ifitm3/Xpr1/Atp1b1/Lcn2/Ifih1/Snrpb/Zbp1/Samhd1/Anxa5/Adar/Alpk1/Cxcl9/Irf5/Zc3hav1/Kcnj8/Atg7/Itgax/Car7/Nlrx1/Nup93/Traf3ip1/Tkfc/Ifit1/Cd207/Cxcl10/Becn1/Isg15/Cox8a/Fam13b/Mbd5/Unc93b1/Spon2/Ddx60/Polr3k/Smurf1/Supt3/Isg20/Zfp189/Stat2…	86
BP	GO:2000278	regulation of DNA biosynthetic process	31/4218	88/20432	0.00106422	0.0158302	Pparg/Pnkp/Fgfr4/Cct4/Map3k4/Ddx39b/Ten1/Ctc1/Hmbox1/Cct5/Gsk3b/Cdkn1a/Rgn/Gnl3l/Cct8/Nek7/Hgf/Rfc5/Nox4/Terf2/Chek1/Atr/Rfc3/Gfer/Prkd2/Gja1/Ptk2b/Trp53/Hnrnpc/Tcp1/Gdf2	31
BP	GO:0019058	viral life cycle	60/4218	200/20432	0.00107013	0.015876	Cav2/Trim25/Rad23a/Pkn2/Chmp2b/Eif2ak4/Snf8/Cav1/Hyal2/Ace2/Hspa8/Pfn1/Ddx39b/Trim11/Rsad2/Snw1/Trim27/Trim35/Park2/Hsp90ab1/Eif2ak2/Tap2/Trim26/Pcsk5/Pcx/Trim8/Ifitm3/Apcs/Itgav/Vps16/Zfp639/Adar/Chmp5/Vcp/Eps15/Zc3hav1/Atg7/Eif3f/Gas6/Mre11a/Smarca4/Hacd3/Thoc5/Trim13/Isg15/Tap1/Isg20/Tardbp/Oasl1/Zc3h12a/Bst2/Atg16l2/Vamp8/Lrrc15/Chmp3/Thoc7/Pcbp2/Srpk2/Parp10/Lgals1	60
BP	GO:1904375	regulation of protein localization to cell periphery	26/4218	70/20432	0.00108123	0.0159858	Itga3/Akt1/Rab11a/Tmbim1/Kif5b/Sptbn1/Rack1/Stx8/Vti1b/Nkd2/Pdpk1/Pkdcc/Itgb1/Lypla1/Tmem59/Arhgef16/Stx4a/Acsl3/Hectd1/Prkci/Cnst/Appl1/Pik3r1/Pid1/Vamp8/Lrrc15	26
BP	GO:0008380	RNA splicing	91/4218	327/20432	0.00108325	0.0159858	Wdr83/Bcas2/Lsm2/Khsrp/Snrpb2/Dqx1/Raver1/Rbm25/Nol3/Hspa8/Skiv2l2/Ddx39b/Sf3a2/Prpf8/Eftud2/Snw1/Snrnp48/Ddx46/Mterf3/Srek1ip1/2700060E02Rik/Mbnl2/Acin1/Khdrbs3/Zcrb1/Ncbp2/Srsf7/Iws1/Prpf19/Sf1/Rps26/Clns1a/Lmntd2/Mterf4/Snrpb/Rbm38/Rnpc3/Zranb2/Ptbp3/Psip1/Ybx1/Srsf10/Ppp1r8/Fastk/Dhx15/Sfswap/Rbm28/Luc7l2/Strap/Snrpa1/Rbmx/Pqbp1/Rbpms/Lsm6/Dcps/Clk3/Usp4/Ttf2/Ccar2/Thoc5/Rsrc1/Rbm17/Lsm1/Sf3b…	91
BP	GO:0097164	ammonium ion metabolic process	22/4218	56/20432	0.00108644	0.0159907	Pon1/Smpd4/Smpdl3a/Sptlc2/Lpcat1/Chkb/Chka/Dbi/Fabp5/Bche/Slc27a1/Pla2g15/Smpd3/Apoa5/Ldlr/Lipc/Acsl3/Lcat/Pnpla8/Scarb1/Cept1/Chpt1	22
BP	GO:0042177	negative regulation of protein catabolic process	32/4218	92/20432	0.0011389	0.0167188	Derl3/Ube2g2/Atraid/Derl2/Cdk5rap3/Fyn/Psen1/Erlec1/Anks1/Wac/Bag6/Smad4/Agap2/Pdcl3/Serpine2/Rgp1/Azin2/Park7/Mad2l2/Mad2l1/Flna/Gabarapl2/Pin1/Psmf1/Mycbp2/Ccar2/Ric1/Ptpn3/Os9/Usp14/Ubxn1/Taf9	32
BP	GO:0002474	antigen processing and presentation of peptide antigen via MHC class I	19/4218	46/20432	0.00115212	0.0168245	Calr/H2-M2/Tapbp/Tap2/Bag6/Mr1/Abcb9/Ifi30/H2-Q4/Tap1/Tapbpl/Abcb4/H2-T24/B2m/H2-K1/H2-Q10/H2-Q8/H2-Q6/H2-Q2	19
BP	GO:0071359	cellular response to dsRNA	19/4218	46/20432	0.00115212	0.0168245	Prkra/Cav1/Tert/Drosha/Dgcr8/Mrpl44/Adar/Ppp3ca/Ncor2/Zc3hav1/Rbm3/Ifit1/Ago1/Zc3h12a/Snip1/Npm1/Flot1/Raet1a/Raet1b	19
BP	GO:0031998	regulation of fatty acid beta-oxidation	4218-10-01	18/20432	0.0011757	0.0169914	Akt1/Plin5/Cpt1a/Acsl5/Dbi/Mtor/Etfbkmt/Acacb/Fabp1/Mlycd	10
BP	GO:0044766	multi-organism transport	4218-10-01	18/20432	0.0011757	0.0169914	Cav2/Cav1/Ddx39b/Tap2/Eps15/Thoc5/Tap1/Bst2/Thoc7/Tcp1	10
BP	GO:0072525	pyridine-containing compound biosynthetic process	4218-10-01	18/20432	0.0011757	0.0169914	Haao/Nadk2/Nadk/Idh2/Qprt/Nadsyn1/Nmnat3/Nmrk1/Aspdh/Kmo	10
BP	GO:1902579	multi-organism localization	4218-10-01	18/20432	0.0011757	0.0169914	Cav2/Cav1/Ddx39b/Tap2/Eps15/Thoc5/Tap1/Bst2/Thoc7/Tcp1	10
BP	GO:0070085	glycosylation	62/4218	209/20432	0.00121687	0.0175411	Kat2b/Sdf2/Lmf1/Man1a/Derl3/Ube2g2/Chp1/Slc35c2/Psen1/Mgat1/Galnt10/Fut8/Trim23/Cln5/Pmm2/St3gal6/Parp3/Parp1/Dpm2/Vcp/St3gal3/Tmem59/Extl1/Mogs/Rpn1/Art4/Magt1/B3gnt3/St3gal4/Stt3a/Stt3b/Engase/Pomt2/Ramp1/Tmem5/Eogt/Ggta1/Alg12/Parp2/Mgat5/Pomk/A4gnt/Hpf1/Edem2/B3galnt2/Pomt1/Alg1/Alg2/Pum3/C1galt1/Krtcap2/Ispd/Dpy19l3/C1galt1c1/Ccdc126/B3galt6/Ces2a/St3gal5/Pgm3/Parp10/Alg6/St6galnac4	62
BP	GO:0009156	ribonucleoside monophosphate biosynthetic process	25/4218	67/20432	0.0012391	0.0177525	Atp5f1/Tcirg1/Atp5d/Slc25a13/Ada/Atp5g3/Atp6v0a1/Umps/Park2/Atp5b/Prps2/Atp5c1/Ampd2/Vcp/Ak2/Ppat/Paics/Gbas/Atp5l/Pklr/Pid1/Chchd10/Atp5k/Impdh2/ATP6	25
BP	GO:0018279	protein N-linked glycosylation via asparagine	14/4218	30/20432	0.00124106	0.0177525	Derl3/Ube2g2/Fut8/St3gal6/Vcp/St3gal3/Rpn1/Magt1/St3gal4/Stt3a/Stt3b/Krtcap2/St3gal5/St6galnac4	14
BP	GO:0019373	epoxygenase P450 pathway	14/4218	30/20432	0.00124106	0.0177525	Cyp2c29/Cyp2a5/Cyp2c55/Cyp2c39/Cyp2c44/Cyp2e1/Cyp2c37/Cyp2g1/Cyp2c50/Cyp2a12/Cyp2c70/Cyp2c54/Cyp2a4/Cyp2c68	14
BP	GO:0009060	aerobic respiration	23/4218	60/20432	0.001254	0.017815	Sdhd/Idh3g/Cs/Mdh2/Sucla2/Sirt3/Idh1/Fh1/Idh3b/Mtfr1/Aco1/Vcp/Idh2/Ndufv1/Chchd5/Cox10/Suclg1/Fxn/Uqcr10/COX1/COX3/Bnip3/Mup1	23
BP	GO:1903201	regulation of oxidative stress-induced cell death	23/4218	60/20432	0.001254	0.017815	Psap/Hspb1/Met/Nol3/Nfe2l2/Rack1/Ripk1/Glrx/Park2/Parp1/Fbxw7/Txn1/Hgf/Park7/Hsph1/Hdac6/Nup93/Tbc1d24/Vnn1/Gfer/Foxo3/Trp53/Gpx1	23
BP	GO:0090002	establishment of protein localization to plasma membrane	44/4218	138/20432	0.00125498	0.017815	Itga3/Akt1/Tspan33/Tmbim1/Kif5b/Sptbn1/Rack1/Efr3b/Slc9a3r1/Kif13a/Nkd2/Krt18/Myl12a/Ehd3/Pdpk1/Pkdcc/Itgb1/Lypla1/Pip5k1a/Tmem59/Arhgef16/Rilpl1/Rilpl2/Tnfrsf1a/Stx4a/Gas6/Bbs2/Ank2/Acsl3/Nsf/Ttc7/Prkci/Cnst/Appl1/Pik3r1/S100a10/Pid1/Kcnb1/Lrrc15/Tmem150a/Rab31/Flot1/Myadm/Ank3	44
BP	GO:0009164	nucleoside catabolic process	4218-11-01	21/20432	0.00127214	0.0178381	Ada/Nudt4/Pnp/Pycrl/Adal/Ahcy/Cda/Nudt9/Nudt7/Nt5e/Dpyd	11
BP	GO:0097352	autophagosome maturation	4218-11-01	21/20432	0.00127214	0.0178381	Snapin/Ubqln4/Phf23/Vps16/Vcp/Vps33a/Snx14/Epg5/Lix1l/Vamp8/Tecpr1	11
BP	GO:0071363	cellular response to growth factor stimulus	130/4218	494/20432	0.00127497	0.0178381	Cav2/Pax9/Itga3/Akt1/Emd/Wwox/Hspb1/Fgfr4/Snx6/Gata6/Tek/Cav1/Fgfrl1/Bmp7/Hyal2/Fuz/Yes1/Plcg1/Nlk/Smurf2/Mtmr4/Fyn/Dcn/Ctgf/Pbld1/Rack1/Stat5b/Snw1/Fut8/Ppm1a/Fos/Ripk1/Rasa1/Pdcd6/Bmpr1a/Gdf10/Fgf9/Bmp1/Angpt1/Snai2/Gsk3b/Cxcl13/Xdh/Pdpk1/Tmem204/Axin1/Bambi/Smad4/Ehd1/Fam20c/Nrp2/Stk16/Epb41l5/Parp1/Abl1/Rab14/Lrp4/Bmp2/E2f1/Ptpn1/Skil/Smad9/Slc33a1/Ntrk1/Ptpn12/Hgf/Klb/Pdgfra/Ulk1/Zyx/Strap/C…	130
BP	GO:0071333	cellular response to glucose stimulus	34/4218	100/20432	0.00127722	0.0178381	Sri/Cacna1e/Kif5b/Igf1/Rack1/Stxbp4/Gpld1/Hmgcr/Park2/Bad/Map4k4/Gpr39/Mpc2/Ppp3ca/Cyp7a1/Aacs/Atg7/Nox4/Stx4a/Gas6/Smarca4/Adra2a/Pim3/Sin3a/Pla2g6/Prkce/Gpr68/Kcnb1/Jagn1/Lepr/Gpx1/Hmgn3/Rab11b/Mup1	34
BP	GO:0034249	negative regulation of cellular amide metabolic process	45/4218	142/20432	0.00127975	0.0178381	Hnrnpd/Mov10/Prkra/Calr/Eif2ak4/Eif4ebp2/Cpeb4/Rack1/Drosha/Dgcr8/Eif2ak2/Cpeb1/Mrpl44/Eprs/Caprin1/Fxr1/Adar/Ppp3ca/Ncor2/Caprin2/Rps3/Rbm3/Eif2ak3/Dapk3/Paip2/Rnf139/Rara/Ormdl3/Cpeb3/Zc3h12d/Ago1/Enc1/Mvk/Zc3h12a/Dnd1/Paip2b/Mex3d/Sorl1/Snip1/Prkca/Gapdh/Upf1/Qk/C330021F23Rik/Rpl13a	45
BP	GO:0042773	ATP synthesis coupled electron transport	18/4218	43/20432	0.00128212	0.0178381	Cox5a/Ndufs6/Ndufb9/Ndufb8/Ndufa10/Park7/Coq7/Cox4i1/Cox8a/Ndufa7/Bdnf/Uqcr10/Uqcrh/ND2/ND4/ND5/CYTB/ND4L	18
BP	GO:1900408	negative regulation of cellular response to oxidative stress	18/4218	43/20432	0.00128212	0.0178381	Psap/Hspb1/Met/Nol3/Nfe2l2/Rack1/Glrx/Park2/Scly/Txn1/Hgf/Park7/Hsph1/Nup93/Tbc1d24/Vnn1/Gfer/Gpx1	18
BP	GO:1902883	negative regulation of response to oxidative stress	18/4218	43/20432	0.00128212	0.0178381	Psap/Hspb1/Met/Nol3/Nfe2l2/Rack1/Glrx/Park2/Scly/Txn1/Hgf/Park7/Hsph1/Nup93/Tbc1d24/Vnn1/Gfer/Gpx1	18
BP	GO:0008299	isoprenoid biosynthetic process	13/4218	27/20432	0.00128847	0.0178819	Mvd/Dhdds/Fdft1/Hmgcr/Pdss1/Hmgcs2/Pmvk/Mvk/Ispd/Rdh9/Fdps/Rdh16/Hmgcs1	13
BP	GO:0032846	positive regulation of homeostatic process	62/4218	210/20432	0.00138454	0.0189876	Acvr1b/Pnkp/Sri/Bax/Gstm7/Kif5b/Cav1/Cct4/Map3k4/Plcg1/Slc22a5/Avpr1a/Stat5b/Gpld1/Hmbox1/Ednrb/Cct5/Cd4/Park2/Pdpk1/Bad/Gsto1/Cct8/Smap1/Gpr39/Dbi/Nek7/Mpc2/Abl1/F2/Car2/Htt/Atg7/Stx4a/Slc27a1/Car7/Terf2/Mre11a/Agt/Ets1/Smarca4/Atr/Ankrd54/Cxcl10/Isg15/Sec24a/Kdm1a/Metrnl/Slx4/Inhba/Pla2g6/Tmem64/Prkce/Hcar2/Gpr68/Foxo3/Acvr2a/Mapk14/Lepr/Bak1/Tcp1/Ccr5	62
BP	GO:0030260	entry into host cell	20/4218	50/20432	0.00138851	0.0189876	Cav2/Trim25/Cav1/Hyal2/Fuca2/Trim11/Exoc7/Exoc2/Trim26/Trim8/Ifitm3/Apcs/Itgav/Vps16/Zfp639/Eps15/Gas6/Mre11a/Vamp8/Lgals1	20
BP	GO:0044409	entry into host	20/4218	50/20432	0.00138851	0.0189876	Cav2/Trim25/Cav1/Hyal2/Fuca2/Trim11/Exoc7/Exoc2/Trim26/Trim8/Ifitm3/Apcs/Itgav/Vps16/Zfp639/Eps15/Gas6/Mre11a/Vamp8/Lgals1	20
BP	GO:0051806	entry into cell of other organism involved in symbiotic interaction	20/4218	50/20432	0.00138851	0.0189876	Cav2/Trim25/Cav1/Hyal2/Fuca2/Trim11/Exoc7/Exoc2/Trim26/Trim8/Ifitm3/Apcs/Itgav/Vps16/Zfp639/Eps15/Gas6/Mre11a/Vamp8/Lgals1	20
BP	GO:0051828	entry into other organism involved in symbiotic interaction	20/4218	50/20432	0.00138851	0.0189876	Cav2/Trim25/Cav1/Hyal2/Fuca2/Trim11/Exoc7/Exoc2/Trim26/Trim8/Ifitm3/Apcs/Itgav/Vps16/Zfp639/Eps15/Gas6/Mre11a/Vamp8/Lgals1	20
BP	GO:0090003	regulation of establishment of protein localization to plasma membrane	20/4218	50/20432	0.00138851	0.0189876	Itga3/Akt1/Tmbim1/Kif5b/Rack1/Nkd2/Pdpk1/Pkdcc/Itgb1/Lypla1/Tmem59/Arhgef16/Stx4a/Acsl3/Prkci/Cnst/Appl1/Pik3r1/Pid1/Lrrc15	20
BP	GO:0046165	alcohol biosynthetic process	32/4218	93/20432	0.00139762	0.0189913	Cyp51/Insig2/Mvd/Dhdds/Plcg1/Cyb5r3/Srebf1/Sptlc2/0610007P14Rik/Fdft1/Hmgcr/Got1/Hsd17b7/Hmgcs2/Pmvk/Ebp/Nsdhl/Sc5d/Apoa5/Lss/Ppip5k1/Fgf1/Ephx1/Mvk/Insig1/Sphk2/Dhcr7/Ptk2b/Fdps/Ipmk/Mas1/Hmgcs1	32
BP	GO:0006112	energy reserve metabolic process	29/4218	82/20432	0.00141567	0.0189913	Akt1/Gnmt/Ppp1cb/Igf1/Pygl/Gbe1/Gsk3b/Pcdh12/Gnas/Dyrk2/Mtor/Gfpt1/Gys2/Phka2/Agl/Phka1/Phkb/Enpp1/Ppp1ca/Ppp1r2/Stbd1/Adra1b/Epm2a/Per2/Adgrf5/Acadm/Ppp1r3c/Ptges3/Mup1	29
BP	GO:0042451	purine nucleoside biosynthetic process	29/4218	82/20432	0.00141567	0.0189913	Atp5f1/Tcirg1/Atp5d/Slc25a13/Ada/Atp5g3/Pank3/Atp6v0a1/Guk1/Pnp/Park2/Atp5b/Prps2/Atp5c1/Adal/Papss1/Vcp/Ppcs/Ak2/Gbas/Nt5e/Nme6/Atp5l/Pklr/Pid1/Chchd10/Atp5k/Impdh2/ATP6	29
BP	GO:0046129	purine ribonucleoside biosynthetic process	29/4218	82/20432	0.00141567	0.0189913	Atp5f1/Tcirg1/Atp5d/Slc25a13/Ada/Atp5g3/Pank3/Atp6v0a1/Guk1/Pnp/Park2/Atp5b/Prps2/Atp5c1/Adal/Papss1/Vcp/Ppcs/Ak2/Gbas/Nt5e/Nme6/Atp5l/Pklr/Pid1/Chchd10/Atp5k/Impdh2/ATP6	29
BP	GO:0007045	cell-substrate adherens junction assembly	24/4218	64/20432	0.00141934	0.0189913	Tek/Pten/Actn1/Wdpcp/Pdpk1/Ptprj/Epb41l5/Itgav/Pip5k1a/Macf1/Arhgap6/Phldb2/Dapk3/Fermt2/Rcc2/Rhod/S100a10/Fmn1/Whamm/Bcas3/Ptk2b/Itgb1bp1/Kdr/Clasp1	24
BP	GO:0009127	purine nucleoside monophosphate biosynthetic process	24/4218	64/20432	0.00141934	0.0189913	Atp5f1/Tcirg1/Atp5d/Slc25a13/Ada/Atp5g3/Atp6v0a1/Park2/Atp5b/Prps2/Atp5c1/Ampd2/Vcp/Ak2/Ppat/Paics/Gbas/Atp5l/Pklr/Pid1/Chchd10/Atp5k/Impdh2/ATP6	24
BP	GO:0009168	purine ribonucleoside monophosphate biosynthetic process	24/4218	64/20432	0.00141934	0.0189913	Atp5f1/Tcirg1/Atp5d/Slc25a13/Ada/Atp5g3/Atp6v0a1/Park2/Atp5b/Prps2/Atp5c1/Ampd2/Vcp/Ak2/Ppat/Paics/Gbas/Atp5l/Pklr/Pid1/Chchd10/Atp5k/Impdh2/ATP6	24
BP	GO:0034620	cellular response to unfolded protein	24/4218	64/20432	0.00141934	0.0189913	Bax/Eif2ak4/Tbl2/Derl3/Nfe2l2/Derl2/Cdk5rap3/Eif2ak2/Rhbdd1/Ptpn1/Eif2ak3/Aars/Nck1/Creb3l3/Tmem33/Edem2/Creb3l2/Wfs1/Stub1/Pik3r1/Bhlha15/Bak1/Nck2/Ccnd1	24
BP	GO:0048041	focal adhesion assembly	24/4218	64/20432	0.00141934	0.0189913	Tek/Pten/Actn1/Wdpcp/Pdpk1/Ptprj/Epb41l5/Itgav/Pip5k1a/Macf1/Arhgap6/Phldb2/Dapk3/Fermt2/Rcc2/Rhod/S100a10/Fmn1/Whamm/Bcas3/Ptk2b/Itgb1bp1/Kdr/Clasp1	24
BP	GO:0006446	regulation of translational initiation	22/4218	57/20432	0.00142862	0.0190699	Eif2ak4/Eif4g2/Eif4ebp2/Eif5/Ncbp2/Eif4a2/Eif2ak2/Fech/Rps6kb2/Eif5b/Eif2b1/Eif2ak3/Nck1/Paip2/Rara/Ythdf2/Paip2b/Ctif/Npm1/Nck2/Polr2g/Rpl13a	22
BP	GO:0090150	establishment of protein localization to membrane	71/4218	247/20432	0.00145227	0.0193394	Itga3/Akt1/Tspan33/Atg4d/Bax/Rab11a/Tmbim1/Kif5b/Sptbn1/Rack1/Efr3b/Rab10/Slc9a3r1/Srp68/Timm9/Hsp90aa1/Kif13a/Ssr1/Nkd2/Tomm22/Krt18/Myl12a/Ehd3/Pdpk1/Pkdcc/Bag6/Rabgef1/Itgb1/Get4/Lypla1/Tram1/Zfand2b/Timm10/Pex16/Pip5k1a/Tmem59/Macf1/Arhgef16/Rilpl1/Rilpl2/Exoc4/Sec61a1/Tnfrsf1a/Stx4a/Gas6/Bbs2/Ank2/Acsl3/Nsf/Ccl2/Cox18/Ttc7/Sh3glb1/Prkci/Cnst/Appl1/Pik3r1/Tram2/S100a10/Adora1/Pid1/Kcnb1/Lrrc1…	71
BP	GO:0071345	cellular response to cytokine stimulus	120/4218	453/20432	0.00148845	0.0197741	Pparg/Il12rb1/Akt1/Mcm2/Cdip1/Smpd4/Shpk/Cdk4/Cav1/Ube2g2/Cdk9/Hyal2/Csf1/Nol3/Nfe2l2/Slc2a4/Acsl1/Irf1/Ccl6/Ccl9/Dcn/Pnpt1/Txndc17/Prpf8/Stat5b/Yy1/Traf3/Ripk1/Angpt1/Sharpin/Gsk3b/Hcls1/Robo1/Ifnar2/Tuba1b/Krt18/Cxcl13/Slc26a6/Park2/Hsp90ab1/Csnk2b/Smad4/Rps6ka4/Bad/Fasn/Rabgef1/Ifitm3/Stat1/Adipor1/Eprs/Mrc1/Nmi/Zc3h15/Mkks/Il1a/Zbp1/Il6ra/Adar/F3/Alad/Podn/Stap1/Cxcl1/Cxcl9/Irf5/Adipor2/Tnfrs…	120
BP	GO:1903409	reactive oxygen species biosynthetic process	30/4218	86/20432	0.00151795	0.0201183	Akt1/Cyba/Cav1/Rhoa/Igf1/Hsp90aa1/Mpv17l/Rgn/Park2/Gbf1/Tlr2/Park7/Slc25a33/Mtor/Gla/Slc7a2/Smpd3/Agt/Cyp1a2/Dnm2/Spr/Eef1a1/Crp/Tlr4/Tspo/Zc3h12a/Foxo3/Ptk2b/Raet1b/Tlr5	30
BP	GO:0006555	methionine metabolic process	4218-08-01	13/20432	0.00154506	0.020333	Gnmt/Mri1/Apip/Adi1/Mthfd1/Cth/Mthfr/Bhmt	8
BP	GO:0009143	nucleoside triphosphate catabolic process	4218-08-01	13/20432	0.00154506	0.020333	Ada/Smpdl3a/Enpp3/Dut/Samhd1/Nudt15/Enpp1/Dctpp1	8
BP	GO:0030497	fatty acid elongation	4218-08-01	13/20432	0.00154506	0.020333	Elovl1/Elovl2/Pecr/Tecr/Hacd3/Elovl3/Elovl6/Hacd1	8
BP	GO:0046942	carboxylic acid transport	64/4218	219/20432	0.00155122	0.0203661	Pparg/Akt1/Slc1a5/Crot/Slc5a6/Pla2g12b/Slc38a3/Slc25a13/Serinc3/Slc13a3/Acsl1/Psen1/Slc16a7/Avpr1a/Slc1a4/Slc36a1/Acsl6/Slc9a3r1/Slc13a5/Slc46a1/Abcc3/Slc25a17/Slc10a2/Slc26a6/Slc23a1/Acsl5/Abcc2/Slc25a10/Agxt/Sept2/Mpc2/Slc27a2/Il1a/Pla2g12a/Plin2/Htt/Slc15a4/Slc6a12/Slco1b2/Slc27a5/Slco2b1/Aqp8/Acsl4/Abcd1/Slc7a2/Slc27a1/Abcc4/P2ry2/Slc16a1/Myo6/Sfxn5/Pnpla8/Thbs1/Adora1/Abcb4/Pla2g6/Slc16a13/S…	64
BP	GO:0043039	tRNA aminoacylation	19/4218	47/20432	0.00156389	0.0204844	Vars/Cars/Qrsl1/Wars/Mrpl39/Aars2/Lars/Nars/Farsb/Eprs/Dars2/Tars2/Yars/Tarsl2/Aars/Lars2/Vars2/Mars/Sars2	19
BP	GO:1901607	alpha-amino acid biosynthetic process	23/4218	61/20432	0.00162485	0.0212332	Mri1/Apip/Cad/Pah/Adi1/Mthfd1/Dhfr/Glud1/Pycrl/Got1/Padi4/Shmt2/Aasdhppt/Asnsd1/Agxt/Glul/Ahcy/Cth/Park7/Mthfr/Got2/Sephs2/Bhmt	23
BP	GO:0006397	mRNA processing	108/4218	403/20432	0.00164976	0.0215083	Wdr83/Pan2/Bcas2/Lsm2/Khsrp/Snrpb2/Dqx1/Rnmt/Cdk9/Raver1/Rbm25/Nol3/Hspa8/Skiv2l2/Ddx39b/Sf3a2/Pnpt1/Prpf8/Eftud2/Zc3h14/Snw1/Papola/Snrnp48/Ddx46/Srek1ip1/Rbm26/Mbnl2/Acin1/Khdrbs3/Zcrb1/Ncbp2/App/Noct/Srsf7/Mtpap/Nelfe/Iws1/Prpf19/Sf1/Pdcd11/Clns1a/Lmntd2/Cpeb1/Cdc73/Snrpb/Rbm38/Adar/Rnpc3/Zranb2/Ptbp3/Psip1/Ybx1/Srsf10/Ppp1r8/Ssu72/Cdk11b/Dhx15/Sfswap/Rbm28/Luc7l2/Strap/Snrpa1/Rnf40/Rbmx/Pqbp1…	108
BP	GO:0051272	positive regulation of cellular component movement	118/4218	446/20432	0.00169724	0.0220406	Acvr1b/Sema6b/Col1a1/Itga3/Akt1/Calr/Aqp1/Rab11a/Hspb1/Tek/Nsmf/Met/Retn/Csf1/Nfe2l2/Plcg1/Pfn1/Smurf2/Cxcl16/Aoc3/Igf1/Rack1/Pecam1/Stat5b/Carmil1/Gpld1/Pdcd6/Tert/Rnase10/Elp3/Angpt1/Snai2/Mylk/Cxcl13/Sema4g/Ptprj/Cpeb1/Itgb1/Pdgfa/Cxcr2/Epb41l5/Itga4/Itgav/Pax6/Bmp2/Il1a/Postn/Pdcd10/Tlr2/Pdgfc/Sema4a/F3/Stmn1/Hgf/Pdgfra/Rufy3/Cxcl1/Cxcl9/Anxa3/Nox4/Coro1a/Stx4a/Hdac6/Vegfd/Gas6/Fgfr1/Cfap20/A…	118
BP	GO:0006891	intra-Golgi vesicle-mediated transport	15/4218	34/20432	0.0017024	0.0220406	Cog1/Vti1b/Copa/Cux1/Gcc1/Cog4/Cog8/Gabarapl2/Rab6b/Nsf/Gcc2/Dnajc28/Sorl1/Cope/Copz1	15
BP	GO:0071827	plasma lipoprotein particle organization	15/4218	34/20432	0.0017024	0.0220406	Abca1/Lpl/Abca5/Gpihbp1/Apom/Fech/Apoa5/Lipc/Acsl3/Lcat/Scarb1/Plagl2/Ces1d/Ces1g/Nr1h2	15
BP	GO:0005977	glycogen metabolic process	26/4218	72/20432	0.00173583	0.0222163	Akt1/Gnmt/Ppp1cb/Igf1/Pygl/Gbe1/Gsk3b/Pcdh12/Dyrk2/Mtor/Gfpt1/Gys2/Phka2/Agl/Phka1/Phkb/Enpp1/Ppp1ca/Ppp1r2/Stbd1/Adra1b/Epm2a/Per2/Acadm/Ppp1r3c/Ptges3	26
BP	GO:0006073	cellular glucan metabolic process	26/4218	72/20432	0.00173583	0.0222163	Akt1/Gnmt/Ppp1cb/Igf1/Pygl/Gbe1/Gsk3b/Pcdh12/Dyrk2/Mtor/Gfpt1/Gys2/Phka2/Agl/Phka1/Phkb/Enpp1/Ppp1ca/Ppp1r2/Stbd1/Adra1b/Epm2a/Per2/Acadm/Ppp1r3c/Ptges3	26
BP	GO:0010657	muscle cell apoptotic process	26/4218	72/20432	0.00173583	0.0222163	Apoh/Cav1/Nol3/Hspa8/Nfe2l2/Igf1/Igfbp3/Hmgcr/Fbxo32/Gsk3b/Rps6ka2/Pdpk1/Pdcd4/Cxcr2/Gngt1/Agt/Hand2/Pik3r1/Zc3h12a/Agtr1a/Sirt5/Ptk2b/Trp53/Qk/Erbb4/Bnip3	26
BP	GO:0044042	glucan metabolic process	26/4218	72/20432	0.00173583	0.0222163	Akt1/Gnmt/Ppp1cb/Igf1/Pygl/Gbe1/Gsk3b/Pcdh12/Dyrk2/Mtor/Gfpt1/Gys2/Phka2/Agl/Phka1/Phkb/Enpp1/Ppp1ca/Ppp1r2/Stbd1/Adra1b/Epm2a/Per2/Acadm/Ppp1r3c/Ptges3	26
BP	GO:1903426	regulation of reactive oxygen species biosynthetic process	26/4218	72/20432	0.00173583	0.0222163	Akt1/Cyba/Cav1/Rhoa/Igf1/Hsp90aa1/Mpv17l/Rgn/Park2/Tlr2/Park7/Slc25a33/Mtor/Gla/Smpd3/Agt/Dnm2/Eef1a1/Crp/Tlr4/Tspo/Zc3h12a/Foxo3/Ptk2b/Raet1b/Tlr5	26
BP	GO:0006897	endocytosis	127/4218	485/20432	0.001748	0.022268	Cav2/Pparg/Hip1r/Rin2/Ap2a2/Apoc2/Csnk1g2/Calr/Cnn2/Snx6/Clint1/Cyba/Cav1/Tusc2/Pten/Abca1/Hspa8/Pacsin2/Cxcl16/Rab21/Rack1/Pdia6/Pecam1/Ankfy1/Rabep1/Carmil1/Scara5/Lrp12/Angpt1/Myh9/App/Itsn1/Atp9b/Nedd4l/Ehd1/Rabgef1/Atp5b/Ifitm3/Itgb1/Smap1/Cxcr2/Fcgr2b/Mrc1/Abl1/Tor1a/Rab14/Itga4/Lrp2/Itgav/Lrp4/Snx5/Ptpn1/Atp9a/Arfgap1/Clta/Eps15/Cap1/Stap1/Anxa3/Ulk1/Atg7/Mfge8/Coro1a/Gas6/Ldlr/Tgfbr2/Pik3…	127
BP	GO:0044770	cell cycle phase transition	87/4218	315/20432	0.00174949	0.022268	Acvr1b/Calm1/Akt1/Ccne1/Paxip1/Cdkn1b/Ier3/Phb2/Rab11a/Susd2/Cdk4/Pole/Pten/Eps8/H2afy/Cdk5rap3/E2f7/Hus1/Ppm1d/Stxbp4/Klf11/Ctc1/Id4/Tert/Psme1/Mtbp/Prkdc/App/Cdkn1a/Brd4/Spast/Ccny/Ercc3/Prpf19/Ovol1/Itgb1/Cdc73/Nek6/E2f1/Pkia/E2f5/Cks1b/Ppp3ca/Ccne2/Anp32b/Rps6/Cdkn2c/Rpa2/Cdk14/Rint1/Anapc4/Mad1l1/Mad2l1/Xpc/Blm/Pagr1a/Cul4b/Mre11a/Chek1/Kank2/Zw10/Cdc25a/Cacul1/Ino80/Tjp3/Plk5/Cdkn1c/Atf5/Ub…	87
BP	GO:0034284	response to monosaccharide	45/4218	144/20432	0.00175245	0.022268	Sri/Cacna1e/Kif5b/Igf1/Rack1/Srebf1/Stxbp4/Gpld1/Hmgcr/Slc26a6/Park2/Bad/Map4k4/Gpr39/Glul/Mpc2/Casp6/Ppp3ca/Cyp7a1/Eif2b3/Slc2a5/Eif2b1/Aacs/Gys2/Atg7/Nox4/Stx4a/Gas6/Smarca4/Adra2a/Pim3/Nr0b2/Thbs1/Sin3a/Pla2g6/Prkce/Gpr68/Kcnb1/Plcb1/Jagn1/Lepr/Gpx1/Hmgn3/Rab11b/Mup1	45
BP	GO:0006418	tRNA aminoacylation for protein translation	18/4218	44/20432	0.0017558	0.022268	Vars/Cars/Wars/Mrpl39/Aars2/Lars/Nars/Farsb/Eprs/Dars2/Tars2/Yars/Tarsl2/Aars/Lars2/Vars2/Mars/Sars2	18
BP	GO:0051056	regulation of small GTPase mediated signal transduction	62/4218	212/20432	0.0017821	0.0225505	Itga3/Sipa1l2/Myo9b/Stambp/Vav2/Ppp2cb/Csf1/Abca1/Cyth1/Crk/Igf1/Net1/Rasa1/Arhgef3/Trio/Robo1/Itsn1/Tiam2/Shoc2/Plce1/Dnmbp/Rabgef1/Eps8l2/Farp1/Arhgef9/Itgb1/Ngef/Psd4/Ntrk1/Arhgef19/Arhgef16/Arhgdib/Sipa1l3/Adgrg1/Lpar2/Rasa2/Arhgef17/Dnm2/Fgd5/Farp2/Scai/Arhgap26/Psd/Spry1/Plekhg2/Plekhg6/Fbxo8/Mapkap1/Rap1gap2/Ralgps1/Mmd2/Prex1/Madd/Arhgef1/Rap1gap/Reln/Arhgef37/Adra1a/Adra1b/Arhgap42/Flot1…	62
BP	GO:0000077	DNA damage checkpoint	33/4218	98/20432	0.00179095	0.0225962	Ier3/Zak/Cdk5rap3/Ddx39b/Cry1/Hus1/Rad1/Prkdc/Cdkn1a/Wac/Prpf19/Nek6/E2f1/Rpa2/Rint1/Clock/Xpc/Blm/Mre11a/Chek1/Usp28/Atr/Ccar2/Thoc5/Plk5/Ints7/Dtl/Trp53bp1/Bre/Fbxo31/Mapk14/Trp53/Ccnd1	33
BP	GO:0030335	positive regulation of cell migration	112/4218	421/20432	0.0017938	0.0225962	Acvr1b/Sema6b/Col1a1/Itga3/Akt1/Calr/Aqp1/Rab11a/Hspb1/Tek/Nsmf/Met/Retn/Csf1/Nfe2l2/Plcg1/Pfn1/Smurf2/Cxcl16/Aoc3/Igf1/Rack1/Pecam1/Carmil1/Gpld1/Pdcd6/Tert/Elp3/Angpt1/Snai2/Mylk/Cxcl13/Sema4g/Ptprj/Cpeb1/Itgb1/Pdgfa/Cxcr2/Epb41l5/Itga4/Itgav/Pax6/Bmp2/Il1a/Postn/Pdcd10/Tlr2/Pdgfc/Sema4a/F3/Hgf/Pdgfra/Rufy3/Cxcl1/Cxcl9/Anxa3/Nox4/Coro1a/Stx4a/Hdac6/Vegfd/Gas6/Fgfr1/Agt/Pdgfd/Ets1/Ctsh/Tgfbr2/P2…	112
BP	GO:0022900	electron transport chain	24/4218	65/20432	0.00181575	0.0228213	Cox5a/Slc25a13/Cyb561/Ndufs6/Ndufb9/Ndufb8/Ndufa10/Etfdh/Park7/Coq7/Cox4i1/Cox8a/Mybbp1a/Ndufa7/Bdnf/Uqcr10/Uqcrh/ND2/COX2/COX3/ND4/ND5/CYTB/ND4L	24
BP	GO:2001235	positive regulation of apoptotic signaling pathway	50/4218	164/20432	0.00182798	0.0228682	Eef1e1/Prkra/Bax/Wwox/Ppp2r1a/Cav1/Hyal2/Faf1/Pten/Bik/Serinc3/Ubb/Rack1/Slc9a3r1/Ripk1/Ppif/Stk3/Gsk3b/Park2/Fas/Bad/Pdia3/Rbck1/Skil/Fbxw7/Park7/Ctsc/Rps3/Eif2ak3/Jak3/Agt/Ctsh/Nck1/Dapk3/Sh3glb1/Ctnna1/Thbs1/Ppp1ca/Inhba/Pla2g6/Plagl2/S100a8/Bak1/Trp53/Ei24/Nck2/Htra2/Plekhf1/Bnip3/Tnfsf12	50
BP	GO:0018196	peptidyl-asparagine modification	14/4218	31/20432	0.00183694	0.0228682	Derl3/Ube2g2/Fut8/St3gal6/Vcp/St3gal3/Rpn1/Magt1/St3gal4/Stt3a/Stt3b/Krtcap2/St3gal5/St6galnac4	14
BP	GO:0090342	regulation of cell aging	14/4218	31/20432	0.00183694	0.0228682	Eef1e1/Pten/Pnpt1/Tert/Bmpr1a/Nek4/Prkdc/March5/Abl1/Lmna/Terf2/Arntl/Zfp277/Trp53	14
BP	GO:0032870	cellular response to hormone stimulus	118/4218	447/20432	0.00184516	0.0228682	Cav2/Pparg/Kat2b/Akt1/Nr2f6/Calr/Phb2/Aqp1/Nr1i3/Gata6/Nr2c2/Nsmf/Cdk4/Cav1/Rhoa/Bmp7/Med16/Rxrg/Med24/Slc2a4/Acsl1/Irf1/Pdk4/Sgk1/Cry1/Igf1/Eif4ebp2/Avpr1a/Acaca/Srebf1/Stxbp4/Rab10/Stat5b/Gpld1/Med4/Fbxo32/Ppara/Rangap1/Prkdc/Calcoco1/Pdpk1/Mzb1/Csnk2b/Baiap2/Cpeb1/Stat1/Adipor1/Parp1/Nr4a2/Mkks/Gnas/Ptpn1/Car2/Anxa5/Ybx1/Pik3r3/Park7/Slc25a33/Clock/Adipor2/Fkbp4/Nucb2/Pagr1a/Nr3c2/Bbs2/Slc27a1…	118
BP	GO:1901606	alpha-amino acid catabolic process	20/4218	51/20432	0.00184654	0.0228682	Prodh/Afmid/Glud1/Gldc/Got1/Agxt/Ahcy/Tdo2/Ppat/Hpd/Aass/Fah/Ido2/Got2/Amt/Gcsh/Aspg/Fam206a/Kmo/Thnsl2	20
BP	GO:2001244	positive regulation of intrinsic apoptotic signaling pathway	20/4218	51/20432	0.00184654	0.0228682	Prkra/Bax/Cav1/Serinc3/Ubb/Rack1/Slc9a3r1/Park2/Skil/Fbxw7/Park7/Rps3/Eif2ak3/Nck1/Plagl2/S100a8/Trp53/Ei24/Nck2/Plekhf1	20
BP	GO:0007178	transmembrane receptor protein serine/threonine kinase signaling pathway	84/4218	303/20432	0.0018481	0.0228682	Cav2/Acvr1b/Itga3/Snx6/Gata6/Cav1/Bmp7/Nlk/Smurf2/Mtmr4/Pbld1/Sptbn1/Snw1/Fut8/Ppm1a/Fos/Meg3/Bmpr1a/Gdf10/Fgf9/Bmp1/Lnpep/Pdpk1/Axin1/Bambi/Csnk2b/Smad4/Hexa/Parp1/Abl1/Lrp4/Bmp2/Skil/Nceh1/Ppm1l/Smad9/Slc33a1/Zyx/Strap/Tgfb1i1/Usp9x/Rbpms/Hpgd/Cdh5/Pin1/Bmp5/Stoml1/Tgfbr2/Nup93/Dnm2/Ccl2/Spg20/Atoh8/Fermt2/Snx25/Gdf15/Smurf1/Lefty1/Bmp6/Stub1/Slc39a5/Cited2/Thbs1/Npnt/Inhba/Cldn5/Fam83g/Nrep/Me…	84
BP	GO:0006656	phosphatidylcholine biosynthetic process	4218-09-01	16/20432	0.00186166	0.0228841	Lpcat1/Chkb/Chka/Fabp5/Slc27a1/Acsl3/Lcat/Cept1/Chpt1	9
BP	GO:0030150	protein import into mitochondrial matrix	4218-09-01	16/20432	0.00186166	0.0228841	Timm44/Tomm40/Tomm40l/Timm23/Tomm22/Grpel2/Timm21/Timm17b/Tomm20	9
BP	GO:1900745	positive regulation of p38MAPK cascade	4218-09-01	16/20432	0.00186166	0.0228841	Met/Map3k4/Gadd45b/Xdh/Bmp2/Gadd45a/Hand2/Zc3h12a/Gdf6	9
BP	GO:0006690	icosanoid metabolic process	34/4218	102/20432	0.00187003	0.0229366	Cyp2c29/Cyp2a5/Ggt5/Fads1/Ptgds/Cyp2j9/Lta4h/Avpr1a/Cyp4f14/Cyp2c55/Cyp2c39/Cyp2c44/Cyp2e1/Ptges2/Tlr2/Fam213b/Tnfrsf1a/Hpgd/Pnpla8/Tlr4/Daglb/Cyp2c37/Cyp2g1/Ptges/Cyp2c50/Alox5ap/Cyp2a12/Cyp2c70/Cyp2c54/Ptges3/Ptgr2/Cyp2a4/Cyp2c68/Cyp2d12	34
BP	GO:0032844	regulation of homeostatic process	119/4218	452/20432	0.00195683	0.0238739	Comt/Acvr1b/Pnkp/Sri/Bax/Gstm7/Cacna1e/Fgfr4/Cyba/Kif5b/Cav1/Cct4/Map3k4/Nol3/Plcg1/Ada/Slc22a5/Pdk4/Dcn/Avpr1a/Rack1/Stxbp4/Ten1/Ctc1/Stat5b/Gpld1/Hmgcr/Hmbox1/Ednrb/Cct5/Srebf2/Cd4/Park2/Pdpk1/Nedd4l/Bad/Gsto1/Gnl3l/Cct8/Map4k4/Smap1/Cxcr2/Xrcc5/Gpr39/Dbi/Nek7/Parp1/Mpc2/Fcgr2b/Abl1/Itgav/F2/Gnas/Car2/Gclm/Cd38/Htt/Slc30a3/Atg7/Coro1a/Stx4a/Tsc22d3/Slc27a1/Car7/Terf2/Mre11a/Agt/Ets1/Smarca4/Ldl…	119
BP	GO:0017148	negative regulation of translation	42/4218	133/20432	0.00196038	0.0238739	Hnrnpd/Mov10/Prkra/Calr/Eif2ak4/Eif4ebp2/Cpeb4/Rack1/Drosha/Dgcr8/Eif2ak2/Cpeb1/Mrpl44/Eprs/Caprin1/Fxr1/Adar/Ppp3ca/Ncor2/Caprin2/Rps3/Rbm3/Eif2ak3/Dapk3/Paip2/Rnf139/Rara/Cpeb3/Zc3h12d/Ago1/Enc1/Mvk/Zc3h12a/Dnd1/Paip2b/Mex3d/Snip1/Prkca/Gapdh/Upf1/Qk/Rpl13a	42
BP	GO:0009416	response to light stimulus	74/4218	262/20432	0.00196111	0.0238739	Pparg/Akt1/Nr2f6/Bax/Cacna1e/Ppp1cc/Aqp1/Eif2ak4/Rdh13/Gnat2/Hyal2/Map3k4/Ppp1cb/Ube2a/Trove2/Sgk1/Cry1/Ube2b/Hus1/Yy1/Hmgcr/Fbxl3/App/Cdkn1a/Ercc3/Fech/Cabp4/Rbp4/Casp7/Itgb1/Rhbdd1/Pde6d/Xpa/Usp1/Ube4b/Mtor/Sdf4/Htt/Triap1/Gngt1/Xpc/Bhlhe40/Cul4b/Usp2/Chek1/Usp28/Atr/Cdc25a/Ccar2/Ino80/Uaca/Gnat1/Fbxl21/Kdm1a/Dtl/Primpol/Ppp1ca/Atp1a3/Pik3r1/Ccdc66/Dynlrb1/Adra1b/Cacna1c/Sema5b/Bcl3/Ercc6/Bak1/…	74
BP	GO:0051438	regulation of ubiquitin-protein transferase activity	17/4218	41/20432	0.00196353	0.0238739	Pten/Fbxo5/Psen1/Axin1/Abl1/Fbxw7/Park7/Mad2l2/Limk1/Mad2l1/Dcun1d5/Pin1/Trib1/Topors/Ube2l3/Stub1/Zer1	17
BP	GO:0043500	muscle adaptation	31/4218	91/20432	0.00197224	0.023876	Gata6/Cyba/Cdk9/Nol3/Gtf2ird2/Akap1/Ddx39b/Igf1/Fbxo32/Gsk3b/Gtf2ird1/Smad4/Parp1/Ppp3ca/Errfi1/Mtor/Mef2a/Glrx3/Nfatc3/Agt/Pin1/Hand2/Jarid2/Tbce/Pde9a/Prkca/Pde5a/Ece1/Fdps/Tnnt1/Akap13	31
BP	GO:0051592	response to calcium ion	31/4218	91/20432	0.00197224	0.023876	Hnrnpd/Fosb/Cav1/Slc25a13/Krt10/Fos/Gpld1/Pdcd6/Ppif/Mylk/Anxa5/Ppp3ca/Pef1/Htt/Mef2a/Fus/Chp2/Stim1/Nfatc3/Rasgrp2/Entpd6/Sec31a/Syt1/Clic4/Crp/Alg2/Thbs1/Slc25a23/Junb/Alox5ap/CYTB	31
BP	GO:2000147	positive regulation of cell motility	115/4218	435/20432	0.00198153	0.0239367	Acvr1b/Sema6b/Col1a1/Itga3/Akt1/Calr/Aqp1/Rab11a/Hspb1/Tek/Nsmf/Met/Retn/Csf1/Nfe2l2/Plcg1/Pfn1/Smurf2/Cxcl16/Aoc3/Igf1/Rack1/Pecam1/Carmil1/Gpld1/Pdcd6/Tert/Rnase10/Elp3/Angpt1/Snai2/Mylk/Cxcl13/Sema4g/Ptprj/Cpeb1/Itgb1/Pdgfa/Cxcr2/Epb41l5/Itga4/Itgav/Pax6/Bmp2/Il1a/Postn/Pdcd10/Tlr2/Pdgfc/Sema4a/F3/Hgf/Pdgfra/Rufy3/Cxcl1/Cxcl9/Anxa3/Nox4/Coro1a/Stx4a/Hdac6/Vegfd/Gas6/Fgfr1/Cfap20/Agt/Pdgfd/Ets1…	115
BP	GO:0042454	ribonucleoside catabolic process	4218-10-01	19/20432	0.00202492	0.024304	Ada/Nudt4/Pnp/Pycrl/Adal/Ahcy/Cda/Nudt9/Nudt7/Nt5e	10
BP	GO:1902307	positive regulation of sodium ion transmembrane transport	4218-10-01	19/20432	0.00202492	0.024304	Kif5b/Chp1/Cnksr3/Glrx/Atp1b1/Dnm2/Fxyd1/Dmd/Plcb1/Ank3	10
BP	GO:0007569	cell aging	28/4218	80/20432	0.00202497	0.024304	Eef1e1/Calr/Dnaja3/Cav1/Zmiz1/Pten/Zfp354a/Pnpt1/Ctc1/Tert/Bmpr1a/Nek4/Prkdc/Cdkn1a/March5/Pdcd4/Abl1/Lmna/Htt/Nox4/Terf2/Atr/Mapk14/Pla2r1/Arntl/Zfp277/Npm1/Trp53	28
BP	GO:0006760	folic acid-containing compound metabolic process	4218-12-01	25/20432	0.00203973	0.0243246	Fpgs/Mthfd1/Dhfr/Shmt2/Tyms/Mthfr/Aldh1l1/Gch1/Mthfd1l/Mthfs/Ggh/Mthfsl	12
BP	GO:0006896	Golgi to vacuole transport	4218-12-01	25/20432	0.00203973	0.0243246	Ap4m1/Ankfy1/Vti1b/Ehd3/Gbf1/Rab14/Eps15/Vps29/Wipi1/Tgoln1/Tgoln2/Sort1	12
BP	GO:0033273	response to vitamin	4218-12-01	25/20432	0.00203973	0.0243246	Ada/Snw1/Snai2/Pim1/Eif2ak2/Pdia3/Postn/Bche/Serpina7/Gas6/Kank2/Hlcs	12
BP	GO:0071407	cellular response to organic cyclic compound	110/4218	414/20432	0.00204753	0.0243527	Pparg/Akt1/Nr2f6/Prkra/Cdkn1b/Calr/Gstm7/Gstm3/Phb2/Aqp1/Nr1i3/Nr2c2/Cdk4/Cav1/Rhoa/Bmp7/Ehmt2/Med16/Rxrg/Med24/Hdac2/Sgk1/Cry1/Hsp90b1/Igf1/Recql5/Snw1/Gpld1/Glrx/Tert/Med4/Drosha/Fbxo32/Ppara/Snai2/Dgcr8/App/Calcoco1/Slc26a6/Pim1/Axin1/Bad/Btrc/Stat1/Mrpl44/Parp1/Nr4a2/Pdia3/Bmp2/Gnas/Smad9/Adar/Ntrk1/Ppp3ca/Cyp7a1/Pde4b/Alpl/Park7/Clock/Ncor2/Zc3hav1/Fkbp4/Blm/Pak4/Pagr1a/Rbm3/Nr3c2/Med17/Smar…	110
BP	GO:0042455	ribonucleoside biosynthetic process	32/4218	95/20432	0.00207105	0.0243527	Atp5f1/Tcirg1/Atp5d/Cad/Slc25a13/Ada/Atp5g3/Pank3/Atp6v0a1/Guk1/Pnp/Umps/Park2/Atp5b/Prps2/Atp5c1/Pdcl3/Adal/Papss1/Vcp/Ppcs/Ak2/Gbas/Nt5e/Nme6/Atp5l/Pklr/Pid1/Chchd10/Atp5k/Impdh2/ATP6	32
BP	GO:0048525	negative regulation of viral process	32/4218	95/20432	0.00207105	0.0243527	Trim25/Eif2ak4/Dhx58/Trim11/Rsad2/Trim27/Trim35/Park2/Eif2ak2/Trim26/Trim8/Ifitm3/Stat1/Apcs/Zfp639/Adar/Zc3hav1/Mre11a/Nlrx1/Traf3ip1/Tkfc/Trim13/Isg15/Isg20/Tardbp/Oasl1/Zc3h12a/Bst2/Chmp3/Pcbp2/Srpk2/Parp10	32
BP	GO:0015718	monocarboxylic acid transport	37/4218	114/20432	0.00207134	0.0243527	Pparg/Akt1/Crot/Slc5a6/Pla2g12b/Acsl1/Slc16a7/Acsl6/Slc9a3r1/Abcc3/Slc25a17/Slc10a2/Slc26a6/Acsl5/Abcc2/Mpc2/Slc27a2/Il1a/Pla2g12a/Plin2/Slco1b2/Slc27a5/Slco2b1/Aqp8/Acsl4/Abcd1/Slc27a1/Abcc4/P2ry2/Slc16a1/Pnpla8/Thbs1/Abcb4/Pla2g6/Slc16a13/Fabp1/Pla2r1	37
BP	GO:0046854	phosphatidylinositol phosphorylation	4218-11-01	22/20432	0.00207257	0.0243527	Efr3b/Impa2/Pi4k2a/Impa1/Pik3c2g/Pik3cb/Ip6k2/Pi4kb/Pik3cd/Pi4ka/Tmem150a	11
BP	GO:1901032	negative regulation of response to reactive oxygen species	4218-11-01	22/20432	0.00207257	0.0243527	Psap/Met/Nol3/Nfe2l2/Rack1/Glrx/Txn1/Hgf/Park7/Hsph1/Nup93	11
BP	GO:1903206	negative regulation of hydrogen peroxide-induced cell death	4218-11-01	22/20432	0.00207257	0.0243527	Psap/Met/Nol3/Nfe2l2/Rack1/Glrx/Txn1/Hgf/Park7/Hsph1/Nup93	11
BP	GO:0030968	endoplasmic reticulum unfolded protein response	23/4218	62/20432	0.00208545	0.0244002	Bax/Eif2ak4/Tbl2/Derl3/Nfe2l2/Derl2/Cdk5rap3/Eif2ak2/Ptpn1/Eif2ak3/Aars/Nck1/Creb3l3/Tmem33/Edem2/Creb3l2/Wfs1/Stub1/Pik3r1/Bhlha15/Bak1/Nck2/Ccnd1	23
BP	GO:0006892	post-Golgi vesicle-mediated transport	19/4218	48/20432	0.00209378	0.0244002	Ap4m1/Rab10/Ankfy1/Scfd1/Vti1b/Exoc2/Ehd3/Gbf1/Rab14/Eps15/Chic2/Vps29/Dnm2/Wipi1/Stxbp6/Sorl1/Tgoln1/Tgoln2/Sort1	19
BP	GO:0043038	amino acid activation	19/4218	48/20432	0.00209378	0.0244002	Vars/Cars/Qrsl1/Wars/Mrpl39/Aars2/Lars/Nars/Farsb/Eprs/Dars2/Tars2/Yars/Tarsl2/Aars/Lars2/Vars2/Mars/Sars2	19
BP	GO:0046578	regulation of Ras protein signal transduction	56/4218	189/20432	0.00209406	0.0244002	Itga3/Myo9b/Stambp/Vav2/Ppp2cb/Csf1/Abca1/Cyth1/Crk/Igf1/Net1/Rasa1/Arhgef3/Trio/Robo1/Itsn1/Tiam2/Shoc2/Plce1/Dnmbp/Rabgef1/Eps8l2/Farp1/Arhgef9/Itgb1/Ngef/Psd4/Ntrk1/Arhgef19/Arhgef16/Arhgdib/Adgrg1/Lpar2/Rasa2/Arhgef17/Dnm2/Fgd5/Farp2/Scai/Psd/Spry1/Plekhg2/Plekhg6/Fbxo8/Mapkap1/Ralgps1/Mmd2/Prex1/Madd/Arhgef1/Arhgef37/Adra1a/Adra1b/Arhgap42/Flot1/Akap13	56
BP	GO:0006006	glucose metabolic process	54/4218	181/20432	0.0021068	0.0244976	Hk2/Kat2b/Akt1/Gnmt/G6pc2/Ppp1cb/C1qtnf1/Slc35b4/Pdk4/Cry1/Igf1/Igfbp3/Gpld1/Nln/Ppara/Rgn/Park2/Pcx/Cpt1a/Bad/Rbp4/Pfkfb1/Slc45a3/Adipor1/Gpd2/Fabp5/Dyrk2/H6pd/Mtor/Gfpt1/Dgat2/G6pc3/Galm/Gpi1/Enpp1/Pdk2/Ppp1ca/Pik3r1/Serpina12/Pgm5/Acacb/Angptl8/Adra1b/Mapk14/Per2/Gapdh/Lepr/Trp53/Pgk1/Acadm/Ldha/Gdf2/Mlycd/Mup1	54
BP	GO:1901659	glycosyl compound biosynthetic process	33/4218	99/20432	0.00216253	0.0250934	Atp5f1/Tcirg1/Atp5d/Cad/Slc25a13/Ada/Atp5g3/Pank3/Atp6v0a1/Guk1/Pnp/Umps/Park2/Atp5b/Prps2/Atp5c1/Pdcl3/Adal/Papss1/Vcp/Ppcs/Ak2/Gbas/Nt5e/Nme6/Atp5l/Pklr/Pid1/Chchd10/Atp5k/Impdh2/ATP6/Lcmt2	33
BP	GO:0032768	regulation of monooxygenase activity	16/4218	38/20432	0.00218512	0.0252507	Akt1/Nosip/Fcer2a/Cav1/Tert/Dhfr/Npr3/Gsk3b/Park7/Gla/Terf2/Gch1/Scarb1/Acvr2a/Ptk2b/Cnr2	16
BP	GO:0046503	glycerolipid catabolic process	16/4218	38/20432	0.00218512	0.0252507	Apoh/Apoc2/Lipe/Smpd4/Plin5/Lpl/Gpld1/Gpcpd1/Fgf21/Pla2g15/Apoa5/Lipc/Pnpla8/Abhd2/Pnpla3/Ces1d	16
BP	GO:1903533	regulation of protein targeting	78/4218	280/20432	0.00227776	0.026267	Emd/Sri/Rab23/Tek/Dmap1/Hyal2/Faf1/Chp1/Nol3/Akap1/Igf1/Pbld1/Srebf1/Slc9a3r1/Ppm1a/Hsp90aa1/Bmpr1a/Bnip3l/Angpt1/Srebf2/Snai2/Gsk3b/Hcls1/Cdkn1a/Slc17a9/Hsp90ab1/Axin1/Bambi/Hdac3/Smad4/Huwe1/Parp1/Hnmt/Rbck1/Pkia/Tlr2/Fbxw7/Ppp3ca/Txn1/Dyrk2/Prdx1/Mtor/Cdkl2/Tnfrsf1a/Psmd8/Itgax/Chp2/Flna/Gas6/Rbpms/Ablim3/Nup93/Usp36/Ppp3r1/Uaca/Ccl2/Sh3glb1/Ube2l3/Bmp6/Tlr4/Il18/Ddx58/Pik3r1/Zc3h12a/Tlr7/Snip…	78
BP	GO:0006401	RNA catabolic process	42/4218	134/20432	0.00229492	0.0264105	Snd1/Pan2/Dhx34/Lsm2/Khsrp/Skiv2l2/Exosc10/Supv3l1/Pnpt1/Nbas/Drosha/Pop1/Eif3e/Ncbp2/Noct/Lrpprc/Mtpap/Etf1/Dcp2/Exosc7/Exosc8/Pnrc2/Zc3hav1/Lsm6/Dcps/Mlh1/Lsm1/Isg20/Cpeb3/Zc3h12d/Dxo/Dcp1b/Ago1/Papd4/Gtpbp1/Zc3h12a/Mex3d/Ctif/Dis3l2/Upf1/Gspt1/Polr2g	42
BP	GO:1903364	positive regulation of cellular protein catabolic process	35/4218	107/20432	0.00232366	0.0266863	Akt1/Rnf114/Pttg1ip/Pten/Psen1/Sumo3/Rack1/Rnf144a/Nkd2/Rnf19a/Gsk3b/Rgn/Park2/Axin1/Rnf138/Arih1/Fbxw7/Vcp/Atg7/Ctsc/Rnf40/Gclc/Trib1/Rnf125/Prickle1/Rnf139/Rnf144b/Smurf1/Stub1/Rfwd2/Pcsk9/Zfand2a/Ptk2b/Rnf217/Ddrgk1	35
BP	GO:0000045	autophagosome assembly	27/4218	77/20432	0.00233968	0.0268153	Atg4d/Rab23/Ehmt2/Phf23/Psen1/Nprl3/Scfd1/Atg2a/Rb1cc1/Pikfyve/Map1lc3a/Tbc1d14/Ulk1/Gabarapl1/Atg7/Map1lc3b/Gabarapl2/Atg12/Trappc8/Becn1/Sh3glb1/Atg101/Ambra1/Wipi1/Emc6/Atg16l2/Fez2	27
BP	GO:0032784	regulation of DNA-templated transcription, elongation	18/4218	45/20432	0.0023687	0.0269603	Tcea3/Gtf2f1/Ddx39b/Supt4a/Supt4b/Recql5/Brd4/Axin1/Nelfe/Iws1/Cdc73/Ccar2/Tcea1/Thoc5/Tceanc/Ercc6/Wdr61/Ell	18
BP	GO:0009396	folic acid-containing compound biosynthetic process	4218-07-01	11/20432	0.00238126	0.0269603	Fpgs/Mthfd1/Dhfr/Gch1/Mthfd1l/Mthfs/Mthfsl	7
BP	GO:0010885	regulation of cholesterol storage	4218-07-01	11/20432	0.00238126	0.0269603	Pparg/Lpl/Ppara/Srebf2/Ehd1/Scarb1/Nr1h2	7
BP	GO:0042178	xenobiotic catabolic process	4218-07-01	11/20432	0.00238126	0.0269603	Gstm7/Acsl1/Gsto1/Gstm4/Pon3/Gstm2/Ugt1a1	7
BP	GO:0046337	phosphatidylethanolamine metabolic process	4218-07-01	11/20432	0.00238126	0.0269603	Chkb/Chka/Slc27a1/Pla2g15/Lipc/Pnpla8/Etnk2	7
BP	GO:1904293	negative regulation of ERAD pathway	4218-07-01	11/20432	0.00238126	0.0269603	Derl3/Ube2g2/Derl2/Erlec1/Os9/Usp14/Ubxn1	7
BP	GO:0032922	circadian regulation of gene expression	22/4218	59/20432	0.00239433	0.0269989	Relb/Ppp1cc/Ppp1cb/Hdac2/Cry1/Ppara/Noct/Hdac3/Npas2/Per3/Clock/Gfpt1/Bhlhe40/Bhlhe41/Usp2/Ciart/Ppp1ca/Mybbp1a/Nrip1/Arntl/Per2/Cry2	22
BP	GO:2001238	positive regulation of extrinsic apoptotic signaling pathway	22/4218	59/20432	0.00239433	0.0269989	Bax/Wwox/Ppp2r1a/Cav1/Hyal2/Faf1/Pten/Ripk1/Stk3/Fas/Pdia3/Rbck1/Skil/Jak3/Agt/Dapk3/Ctnna1/Thbs1/Ppp1ca/Inhba/Htra2/Tnfsf12	22
BP	GO:0000462	maturation of SSU-rRNA from tricistronic rRNA transcript (SSU-rRNA, 5.8S rRNA, LSU-rRNA)	15/4218	35/20432	0.00241672	0.0271966	Emg1/Utp20/Rps14/Rps24/Mrps11/Rpsa/Noc4l/Utp6/Rps16/Rps21/Tbl3/Rps19/Rps8/Utp18/Utp3	15
BP	GO:0051345	positive regulation of hydrolase activity	113/4218	429/20432	0.00245469	0.0275348	Apoh/Cav2/Pparg/Akt1/Rhoc/Lmf1/Apoc2/Cdkn1b/Bax/Myo9b/Rhoa/Plin5/Evi5/Fnta/Pfn1/Ccl6/Ccl9/Perp/Ctgf/Rack1/Snx13/Net1/Eif5/Tbc1d7/Rasa1/Pdcd6/Gpihbp1/Gsk3b/Robo1/Rgn/Cxcl13/Hsp90ab1/Mtch1/Xdh/Pdpk1/Fas/Bad/Itgb1/Stat1/Bok/Rgs16/Atp1b1/Rabgap1l/Rsu1/Bmp2/Ntrk1/Pip5k1a/F3/Akirin2/Aldob/Vcp/Rgp1/Sh3bgrl3/Arhgef19/Arhgef16/Tbc1d14/Pdgfra/Zc3hav1/Rps3/Chp2/Arhgap6/Fgfr1/Eif2ak3/Agt/Apoa5/Pin1/Ctsh/Tpm1…	113
BP	GO:0001678	cellular glucose homeostasis	37/4218	115/20432	0.00245662	0.0275348	Hk2/Sri/Cacna1e/Kif5b/Igf1/Rack1/Stxbp4/Gpld1/Hmgcr/Park2/Bad/Map4k4/Gpr39/Mpc2/Ppp3ca/Cyp7a1/Aacs/Atg7/Nox4/Stx4a/Gas6/Smarca4/Adra2a/Pim3/Pik3r1/Sin3a/Pla2g6/Prkce/Gpr68/Kcnb1/Jagn1/Lepr/Gpx1/Hmgn3/Rab11b/Mup1/Fcor	37
BP	GO:0042307	positive regulation of protein import into nucleus	32/4218	96/20432	0.00250158	0.0279827	Tek/Dmap1/Hyal2/Igf1/Hsp90aa1/Bmpr1a/Hcls1/Hsp90ab1/Bambi/Hdac3/Smad4/Parp1/Rbck1/Tlr2/Ppp3ca/Tnfrsf1a/Chp2/Flna/Rbpms/Nup93/Ppp3r1/Uaca/Bmp6/Tlr4/Il18/Ddx58/Pik3r1/Zc3h12a/Tlr7/Mapk14/Erbb4/Nlrp12	32
BP	GO:1904951	positive regulation of establishment of protein localization	128/4218	494/20432	0.00252235	0.0281587	Itga3/Akt1/Emd/Sri/Tek/Kif5b/Cct4/Dmap1/Mcu/Hyal2/Chp1/Lpl/Igf1/Sptbn1/Rack1/Rph3al/Ppm1a/Hsp90aa1/Gpld1/Nkd2/Glrx/Glud1/Bmpr1a/Cct5/Srebf2/Gsdmd/Gsk3b/Hcls1/Slc17a9/Park2/Hsp90ab1/Pdpk1/Bambi/Hdac3/Smad4/Bad/Rbp4/Huwe1/Sirt3/Cct8/Itgb1/Gpr39/Glul/Parp1/Mpc2/Abl1/Hnmt/Il1a/Rbck1/Postn/Tlr2/Fbxw7/Ppp3ca/Wls/Arhgef16/Cd38/Rufy3/Cdkl2/Psmd9/Aacs/Il17rc/Atg7/Tnfrsf1a/Psmd8/Il4ra/Itgax/Stx4a/Chp2/Flna…	128
BP	GO:0042304	regulation of fatty acid biosynthetic process	14/4218	32/20432	0.00265172	0.0294337	Apoc2/Insig2/Mid1ip1/Acadvl/Pdk4/Avpr1a/Srebf1/Rgn/Acadl/Slc45a3/Agt/Apoa5/Insig1/Nr1h2	14
BP	GO:1902108	regulation of mitochondrial membrane permeability involved in apoptotic process	14/4218	32/20432	0.00265172	0.0294337	Ier3/Bax/Nol3/Rhot1/Bnip3l/Mpv17l/Gsk3b/Mtch2/Them4/Slc35f6/Sh3glb1/Bloc1s2/Trp53/Bnip3	14
BP	GO:1902749	regulation of cell cycle G2/M phase transition	23/4218	63/20432	0.00265235	0.0294337	Paxip1/Ier3/Rab11a/Cdk4/H2afy/Cdk5rap3/Hus1/Ctc1/App/Brd4/Pkia/Rint1/Blm/Pagr1a/Mre11a/Chek1/Atf5/Rcc2/Sin3a/Mta3/Npm1/Hacd1/Ccnd1	23
BP	GO:0044743	intracellular protein transmembrane import	17/4218	42/20432	0.00267217	0.0295364	Timm44/Tomm40/Tomm40l/Timm23/Pex12/Pex7/Pex13/Timm9/Hsp90aa1/Tomm22/Grpel2/Timm21/Timm10/Pex16/Timm17b/Chchd4/Tomm20	17
BP	GO:1903202	negative regulation of oxidative stress-induced cell death	17/4218	42/20432	0.00267217	0.0295364	Psap/Hspb1/Met/Nol3/Nfe2l2/Rack1/Glrx/Park2/Txn1/Hgf/Park7/Hsph1/Nup93/Tbc1d24/Vnn1/Gfer/Gpx1	17
BP	GO:0000423	macromitophagy	42/4218	135/20432	0.00267778	0.0295401	Hk2/Hsf2bp/Tmem39a/Nr2c2/Sqstm1/Myh11/Slc1a4/Pex13/Hapln1/Acin1/Ndufb9/Mylk/Chaf1b/Park2/Slc22a3/Pi4k2a/Rnf41/Atp1b1/Snrpb/Anxa5/Alpk1/Ulk1/Hdac6/Car7/Nup93/Becn1/Cox8a/Fam13b/Mbd5/Mex3c/Smurf1/Supt3/Zfp189/Stat2/Ambra1/Prkd2/Trem1/Akr1e1/Txlna/Fabp1/Trp53/Tmem203	42
BP	GO:0010821	regulation of mitochondrion organization	55/4218	187/20432	0.0027227	0.029971	Hk2/Akt1/Ier3/Bax/Nol3/Bik/Dcn/Igf1/Srebf1/Ppif/Bnip3l/Srebf2/Mpv17l/Gsk3b/March5/Slc17a9/Park2/Lrpprc/Fas/Bad/Huwe1/Rnf41/Hnmt/Lmna/Fbxw7/Hgf/Slc35f6/Cdkl2/Triap1/Atg7/Psmd8/Itgax/Map1lc3b/Ablim3/Usp36/Vat1/Becn1/Sh3glb1/Inf2/Ube2l3/Stat2/Ambra1/Tspo/Pla2g6/Pid1/Snip1/Plagl2/Bak1/Fxn/Trp53/Kdr/Gpx1/Htra2/Bnip3/Ube2d3	55
BP	GO:0009746	response to hexose	44/4218	143/20432	0.00272756	0.029971	Sri/Cacna1e/Kif5b/Igf1/Rack1/Srebf1/Stxbp4/Gpld1/Hmgcr/Slc26a6/Park2/Bad/Map4k4/Gpr39/Glul/Mpc2/Casp6/Ppp3ca/Cyp7a1/Eif2b3/Slc2a5/Eif2b1/Aacs/Gys2/Atg7/Nox4/Stx4a/Gas6/Smarca4/Adra2a/Pim3/Nr0b2/Thbs1/Sin3a/Pla2g6/Prkce/Gpr68/Kcnb1/Jagn1/Lepr/Gpx1/Hmgn3/Rab11b/Mup1	44
BP	GO:0070585	protein localization to mitochondrion	46/4218	151/20432	0.00275866	0.0301181	Hk2/Akt1/Timm44/Tomm40/Bax/Tomm40l/Timm23/Nol3/Srebf1/Timm9/Hsp90aa1/Bnip3l/Ywhaz/Tomm22/Srebf2/March5/Slc17a9/Park2/Grpel2/Timm21/Huwe1/Mterf4/Hnmt/Timm10/Mtch2/Fbxw7/Cdkl2/Hsph1/Psmd8/Itgax/Timm17b/Ablim3/Usp36/Chchd4/Cox18/Sh3glb1/Ube2l3/Tspo/Immp1l/Timm8a1/Snip1/Plagl2/Mtx1/Htra2/Ube2d3/Tomm20	46
BP	GO:0003158	endothelium development	35/4218	108/20432	0.00276669	0.0301181	Rhoa/Met/Stard13/Pecam1/Marveld2/Angpt1/Stk3/Cldn1/Xdh/Csnk2b/Smad4/Slc40a1/Tnfrsf1a/Cdh5/Agt/Vhl/Cxcl10/Btg1/Fgf1/Clic4/Atoh8/Cul7/Bmp6/Cldn5/Pbrm1/Dmd/Rap1b/Rhob/Kdr/Gpx1/Myadm/Rap1a/Tmem100/Gdf2/Heg1	35
BP	GO:0035023	regulation of Rho protein signal transduction	35/4218	108/20432	0.00276669	0.0301181	Itga3/Myo9b/Vav2/Abca1/Net1/Arhgef3/Trio/Robo1/Itsn1/Tiam2/Dnmbp/Eps8l2/Farp1/Arhgef9/Itgb1/Ngef/Arhgef19/Arhgef16/Arhgdib/Adgrg1/Lpar2/Arhgef17/Fgd5/Farp2/Scai/Plekhg2/Plekhg6/Prex1/Arhgef1/Arhgef37/Adra1a/Adra1b/Arhgap42/Flot1/Akap13	35
BP	GO:0071806	protein transmembrane transport	19/4218	49/20432	0.00276696	0.0301181	Timm44/Tomm40/Tomm40l/Timm23/Hspa8/Pex12/Pex7/Pex13/Timm9/Hsp90aa1/Tomm22/Grpel2/Timm21/Zfand2b/Timm10/Pex16/Timm17b/Chchd4/Tomm20	19
BP	GO:0001952	regulation of cell-matrix adhesion	30/4218	89/20432	0.0027723	0.0301181	Tek/Pten/Csf1/Utrn/Wdpcp/Rasa1/Emp2/Gsk3b/Ptprj/Epb41l5/Postn/Macf1/Arhgap6/Plekha2/Pik3cb/Phldb2/Dapk3/Serpine1/Thbs1/Rcc2/Pik3r1/Rhod/S100a10/Fmn1/Dmd/Bcas3/Ptk2b/Itgb1bp1/Kdr/Clasp1	30
BP	GO:0044843	cell cycle G1/S phase transition	48/4218	159/20432	0.00277326	0.0301181	Acvr1b/Akt1/Ccne1/Cdkn1b/Phb2/Susd2/Cdk4/Pole/Pten/E2f7/Stxbp4/Klf11/Id4/Tert/Psme1/Mtbp/Prkdc/Cdkn1a/Brd4/Itgb1/Cdc73/E2f1/E2f5/Ppp3ca/Ccne2/Anp32b/Rps6/Cdkn2c/Rpa2/Pagr1a/Cul4b/Kank2/Cdc25a/Cacul1/Ino80/Tjp3/Plk5/Inhba/Pid1/Lsm10/Tcf19/Plcb1/Fbxo31/Ube2e2/Trp53/Rpl17/Hacd1/Ccnd1	48
BP	GO:0010976	positive regulation of neuron projection development	78/4218	282/20432	0.00279888	0.0303375	Kat2b/Serpinf1/Rnd2/Itga3/Rab11a/Hspb1/Eif4g2/Gprc5b/Bmp7/Met/Nfe2l2/Fam134c/Fyn/Psen1/Sgk1/Rab21/Actr2/Cobl/Acsl6/Gsk3b/Robo1/Atf1/Park2/Nedd4l/Mob2/Baiap2/Cpeb1/Itgb1/Stau2/Serpine2/Caprin1/Skil/Ntrk1/Hgf/Mtor/Rufy3/Tmem106b/Limk1/Cux1/Caprin2/Fgfr1/Katnb1/Bmp5/Rpl4/Nck1/Nckipsd/Ppp1r9a/P2ry2/Grn/Ankrd27/Eef2k/Plk5/Syt1/Kdm1a/Prkci/Eef1a1/Crp/Fig4/Cul7/Smurf1/Camk1d/Cpeb3/Enc1/Fbxo38/Reln/Cux2/…	78
BP	GO:0006402	mRNA catabolic process	36/4218	112/20432	0.00283832	0.0307054	Pan2/Dhx34/Lsm2/Khsrp/Exosc10/Supv3l1/Pnpt1/Nbas/Eif3e/Ncbp2/Noct/Mtpap/Etf1/Dcp2/Exosc7/Exosc8/Pnrc2/Zc3hav1/Lsm6/Dcps/Mlh1/Lsm1/Cpeb3/Zc3h12d/Dxo/Dcp1b/Ago1/Papd4/Gtpbp1/Zc3h12a/Mex3d/Ctif/Dis3l2/Upf1/Gspt1/Polr2g	36
BP	GO:0010660	regulation of muscle cell apoptotic process	24/4218	67/20432	0.00289667	0.0312762	Apoh/Cav1/Nol3/Hspa8/Nfe2l2/Igf1/Igfbp3/Hmgcr/Fbxo32/Gsk3b/Pdpk1/Pdcd4/Cxcr2/Agt/Hand2/Pik3r1/Zc3h12a/Agtr1a/Sirt5/Ptk2b/Trp53/Qk/Erbb4/Bnip3	24
BP	GO:0006152	purine nucleoside catabolic process	4218-08-01	14/20432	0.00295437	0.0314739	Ada/Nudt4/Pnp/Adal/Ahcy/Nudt9/Nudt7/Nt5e	8
BP	GO:0010421	hydrogen peroxide-mediated programmed cell death	4218-08-01	14/20432	0.00295437	0.0314739	Met/Glrx/Pdcd10/Hgf/Park7/Hsph1/Hdac6/Foxo3	8
BP	GO:0010984	regulation of lipoprotein particle clearance	4218-08-01	14/20432	0.00295437	0.0314739	Apoc2/Gpld1/Gpihbp1/Lrpap1/Crp/Mylip/Pcsk9/Ces1g	8
BP	GO:0019359	nicotinamide nucleotide biosynthetic process	4218-08-01	14/20432	0.00295437	0.0314739	Haao/Nadk2/Nadk/Idh2/Qprt/Nadsyn1/Nmnat3/Aspdh	8
BP	GO:0044068	modulation by symbiont of host cellular process	4218-08-01	14/20432	0.00295437	0.0314739	Eif2ak4/Tnip1/Cd4/Park2/Bad/Atg7/Zc3h12a/Ccr5	8
BP	GO:0046130	purine ribonucleoside catabolic process	4218-08-01	14/20432	0.00295437	0.0314739	Ada/Nudt4/Pnp/Adal/Ahcy/Nudt9/Nudt7/Nt5e	8
BP	GO:0097468	programmed cell death in response to reactive oxygen species	4218-08-01	14/20432	0.00295437	0.0314739	Met/Glrx/Pdcd10/Hgf/Park7/Hsph1/Hdac6/Foxo3	8
BP	GO:0009163	nucleoside biosynthetic process	32/4218	97/20432	0.00300656	0.031969	Atp5f1/Tcirg1/Atp5d/Cad/Slc25a13/Ada/Atp5g3/Pank3/Atp6v0a1/Guk1/Pnp/Umps/Park2/Atp5b/Prps2/Atp5c1/Pdcl3/Adal/Papss1/Vcp/Ppcs/Ak2/Gbas/Nt5e/Nme6/Atp5l/Pklr/Pid1/Chchd10/Atp5k/Impdh2/ATP6	32
BP	GO:0009314	response to radiation	97/4218	363/20432	0.00301391	0.0319863	Pparg/Akt1/Nr2f6/Bax/Zak/Cacna1e/Ppp1cc/Aqp1/Eif2ak4/Rdh13/Gnat2/Hyal2/Map3k4/Ppp1cb/Ube2a/Trove2/Rad51d/Sgk1/Cry1/Ube2b/Hus1/Net1/Yy1/Xrcc4/Hmgcr/Pnp/Fbxl3/Rad1/Prkdc/Snai2/App/Cdkn1a/Ercc3/Fech/Cabp4/Rbp4/Casp7/Itgb1/Nabp1/Rhbdd1/Xrcc5/Pde6d/Lrp2/Xpa/Txn1/Usp1/Ube4b/Mtor/Sdf4/Htt/Clock/Triap1/Gngt1/Xpc/Bhlhe40/Blm/Cul4b/Usp2/Chek1/Usp28/Atr/Cdc25a/Ccar2/Ino80/Uaca/Gnat1/Fbxl21/Gadd45a/Kdm1a/Int…	97
BP	GO:1901292	nucleoside phosphate catabolic process	22/4218	60/20432	0.00305451	0.0323559	Cnp/Ada/Smpdl3a/Enpp3/Nudt4/Hint1/Rack1/Upp2/Dut/Samhd1/Vcp/Pde4b/Nudt9/Nudt7/Nt5e/Nudt15/Enpp1/Aspdh/Dnph1/Pde9a/Dctpp1/Pde5a	22
BP	GO:0006767	water-soluble vitamin metabolic process	4218-12-01	26/20432	0.00308304	0.0325348	Vnn3/Dhfr/Btd/Rgn/Gsto1/Mmadhc/Mmab/Tpk1/Gclc/Acpp/Gulo/Vnn1	12
BP	GO:1900744	regulation of p38MAPK cascade	4218-12-01	26/20432	0.00308304	0.0325348	Met/Map3k4/Gadd45b/Xdh/Bmp2/Hgf/Hsph1/Gadd45a/Hand2/Zc3h12a/Phlpp1/Gdf6	12
BP	GO:1902600	hydrogen ion transmembrane transport	20/4218	53/20432	0.00315139	0.0331311	Atp5f1/Tcirg1/Atp5d/Atp4a/Atp6v1b2/Atp6v0e/Atp5g3/Atp6v0a1/Slc46a1/Atp6v1c1/Atp5b/Atp5c1/Atp6v0d2/Cox7b/Atp6v0b/Cox8a/Atp5l/Atp1a3/Atp5k/ATP6	20
BP	GO:2000378	negative regulation of reactive oxygen species metabolic process	20/4218	53/20432	0.00315139	0.0331311	Hk2/Cav1/Rhoa/Plin5/Aatf/Mpv17l/Rgn/Park2/Sirt3/Pon3/Gla/Birc3/Becn1/Eef1a1/Crp/Tspo/Zc3h12a/Sirt5/Trp53/Bnip3	20
BP	GO:0014902	myotube differentiation	34/4218	105/20432	0.00319892	0.0335676	Cav2/Met/Igf1/Nln/Bin3/Myh9/Gsk3b/Rcan1/Ehd1/Ankrd2/Rbm38/Ppp3ca/Mtor/Cxcl9/Bhlhe41/Il4ra/Stim1/Nfatc3/Cxcl10/Fam65b/Ntn3/Bcl9/Gdf15/Cd53/Dmd/Bhlha15/Mapk14/Flot1/Cxcl12/Hacd1/Cyp26b1/Gpx1/Sort1/Neu2	34
BP	GO:1902751	positive regulation of cell cycle G2/M phase transition	4218-09-01	17/20432	0.00323509	0.0338459	Rab11a/Cdk4/App/Brd4/Rcc2/Sin3a/Mta3/Npm1/Ccnd1	9
BP	GO:0046365	monosaccharide catabolic process	4218-11-01	23/20432	0.00323754	0.0338459	Dhdh/Galk1/Bad/Aldob/Gale/Tkfc/Galm/Galt/Glb1/Trp53/Ldha	11
BP	GO:0046434	organophosphate catabolic process	35/4218	109/20432	0.0032802	0.0342279	Pon1/Apoc2/Smpd4/Cnp/Pten/Plcg1/Ada/Smpdl3a/Enpp3/Nudt4/Hint1/Rack1/Synj2/Impa2/Idh1/Upp2/Dut/Gpcpd1/Impa1/Samhd1/Vcp/Pde4b/Nudt9/Nudt7/Pla2g15/Lipc/Nt5e/Nudt15/Pnpla8/Enpp1/Aspdh/Dnph1/Pde9a/Dctpp1/Pde5a	35
BP	GO:0019320	hexose catabolic process	4218-10-01	20/20432	0.00330582	0.0342397	Galk1/Bad/Aldob/Gale/Tkfc/Galm/Galt/Glb1/Trp53/Ldha	10
BP	GO:0045922	negative regulation of fatty acid metabolic process	4218-10-01	20/20432	0.00330582	0.0342397	Akt1/Insig2/Plin5/Acadvl/Acadl/Dbi/Dgat2/Etfbkmt/Acacb/Insig1	10
BP	GO:0046653	tetrahydrofolate metabolic process	4218-10-01	20/20432	0.00330582	0.0342397	Mthfd1/Dhfr/Shmt2/Tyms/Mthfr/Aldh1l1/Gch1/Mthfd1l/Mthfs/Mthfsl	10
BP	GO:0051156	glucose 6-phosphate metabolic process	4218-10-01	20/20432	0.00330582	0.0342397	G6pc2/Shpk/Hsd11b1/Tkt/Taldo1/Pgd/H6pd/G6pc3/Gpi1/Rpia	10
BP	GO:1903901	negative regulation of viral life cycle	26/4218	75/20432	0.00333913	0.0345078	Trim25/Eif2ak4/Trim11/Rsad2/Trim27/Trim35/Park2/Eif2ak2/Trim26/Trim8/Ifitm3/Apcs/Zfp639/Adar/Zc3hav1/Mre11a/Trim13/Isg15/Isg20/Tardbp/Oasl1/Zc3h12a/Bst2/Chmp3/Srpk2/Parp10	26
BP	GO:0045454	cell redox homeostasis	23/4218	64/20432	0.00334404	0.0345078	Txnrd3/Nfe2l2/Glrx2/Pdia6/Nxn/Tmx1/Glrx/Txndc11/Prdx4/Nnt/Ptges2/Pdia3/Txn1/Prdx1/Sh3bgrl3/Glrx3/Gclc/Qsox2/Aifm1/Txndc5/Tmx2/Egln2/Gpx1	23
BP	GO:0009112	nucleobase metabolic process	15/4218	36/20432	0.00336193	0.0345649	Cad/Ada/Dpys/Tymp/Umps/Xdh/Urah/Uox/Mtor/Paics/Acpp/Dpyd/Kdm1a/Gda/Aox1	15
BP	GO:0071825	protein-lipid complex subunit organization	15/4218	36/20432	0.00336193	0.0345649	Abca1/Lpl/Abca5/Gpihbp1/Apom/Fech/Apoa5/Lipc/Acsl3/Lcat/Scarb1/Plagl2/Ces1d/Ces1g/Nr1h2	15
BP	GO:0009266	response to temperature stimulus	39/4218	125/20432	0.00351579	0.0360282	Chordc1/Clpb/Nr2f6/Dnaja3/Eif2ak4/Hspb7/Acadvl/Igf1/Pdcd6/Scara5/Acadl/P2rx3/Il1a/Ntrk1/Psip1/Eif2b3/Eif2b1/Tfec/Tgfb1i1/Fam175b/Rbm3/Adrb3/Eif2ak3/Slc27a1/Agt/Dnaja4/Gclc/Acot11/Ccl2/Fgf1/Metrnl/Pklr/Adora1/Zfp709/Hikeshi/Acadm/Htra2/Zfp976/Fcor	39
BP	GO:0009201	ribonucleoside triphosphate biosynthetic process	21/4218	57/20432	0.00351715	0.0360282	Atp5f1/Tcirg1/Atp5d/Cad/Slc25a13/Atp5g3/Atp6v0a1/Pnp/Park2/Atp5b/Atp5c1/Vcp/Gbas/Nme6/Atp5l/Pklr/Pid1/Chchd10/Atp5k/Impdh2/ATP6	21
BP	GO:0010656	negative regulation of muscle cell apoptotic process	17/4218	43/20432	0.00358104	0.0365489	Apoh/Cav1/Nol3/Hspa8/Nfe2l2/Igf1/Hmgcr/Gsk3b/Pdpk1/Hand2/Pik3r1/Zc3h12a/Agtr1a/Sirt5/Ptk2b/Qk/Erbb4	17
BP	GO:0071277	cellular response to calcium ion	17/4218	43/20432	0.00358104	0.0365489	Fosb/Krt10/Fos/Gpld1/Ppif/Mylk/Mef2a/Fus/Chp2/Nfatc3/Rasgrp2/Syt1/Clic4/Crp/Slc25a23/Junb/Alox5ap	17
BP	GO:0048145	regulation of fibroblast proliferation	32/4218	98/20432	0.00359595	0.0366342	Pparg/Emd/Med25/Bax/Aqp1/Cdk4/Zmiz1/Wnt2/Igf1/Ctc1/Rasa1/Xrcc4/Prkdc/Cdkn1a/Pdgfa/Cdc73/E2f1/Pdgfc/Rps3a1/Pdgfra/Nupr1/Gas6/Ifi30/Agt/Pdgfd/Fntb/Cd300a/Serpine1/Wapl/Trp53/Parp10/Btc	32
BP	GO:0009142	nucleoside triphosphate biosynthetic process	24/4218	68/20432	0.0036146	0.0367572	Atp5f1/Tcirg1/Atp5d/Cad/Slc25a13/Atp5g3/Atp6v0a1/Pnp/Park2/Atp5b/Atp5c1/Vcp/Gbas/Nme6/Atp5l/Pklr/Ak7/Pid1/Chchd10/Atp5k/Suclg1/Impdh2/ATP6/Tbpl1	24
BP	GO:0006650	glycerophospholipid metabolic process	46/4218	153/20432	0.00365199	0.03707	Ocrl/Smpd4/Pigyl/Pten/Serinc3/Efr3b/Gpld1/Mtmr6/Chkb/Pigp/Pigx/Synj2/Pigf/Impa2/Chka/Pi4k2a/Pdgfa/Pikfyve/Pigc/Dpm2/Gpcpd1/Crls1/Impa1/Pip5k1a/Pigo/Pik3c2g/Cdipt/Pgap2/Slc27a1/Pla2g15/Lipc/Pik3cb/Ip6k2/Tmem55b/Pnpla8/Fig4/Pi4kb/Pigk/Pik3cd/Pitpnc1/Pi4ka/Pla2g6/Tmem150a/Cecr5/Chpt1/Etnk2	46
BP	GO:0040017	positive regulation of locomotion	116/4218	447/20432	0.0036836	0.0373231	Acvr1b/Sema6b/Col1a1/Itga3/Akt1/Calr/Aqp1/Rab11a/Hspb1/Tek/Nsmf/Met/Retn/Csf1/Nfe2l2/Plcg1/Pfn1/Smurf2/Cxcl16/Aoc3/Igf1/Rack1/Pecam1/Carmil1/Gpld1/Pdcd6/Tert/Rnase10/Elp3/Angpt1/Snai2/Mylk/Cxcl13/Sema4g/Ptprj/Cpeb1/Itgb1/Pdgfa/Cxcr2/Epb41l5/Itga4/Itgav/Pax6/Bmp2/Il1a/Postn/Pdcd10/Tlr2/Pdgfc/Sema4a/F3/Hgf/Pdgfra/Rufy3/Cxcl1/Cxcl9/Anxa3/Nox4/Coro1a/Stx4a/Hdac6/Vegfd/Gas6/Fgfr1/Cfap20/Agt/Pdgfd/Ets1…	116
BP	GO:0000377	RNA splicing, via transesterification reactions with bulged adenosine as nucleophile	60/4218	210/20432	0.00373285	0.0376856	Wdr83/Bcas2/Lsm2/Snrpb2/Dqx1/Raver1/Rbm25/Nol3/Hspa8/Ddx39b/Sf3a2/Prpf8/Snw1/Ddx46/Mbnl2/Acin1/Khdrbs3/Zcrb1/Ncbp2/Srsf7/Prpf19/Sf1/Clns1a/Lmntd2/Snrpb/Rnpc3/Ptbp3/Psip1/Srsf10/Dhx15/Sfswap/Luc7l2/Strap/Snrpa1/Rbmx/Pqbp1/Rbpms/Lsm6/Dcps/Usp4/Rsrc1/Rbm17/Sf3b6/Slc39a5/Rbm7/Zrsr1/Lsm8/Npm1/Txnl4a/Gemin2/Hnrnpc/Snrpa/U2af1/Srpk2/Nhp2l1/Dazap1/Srsf3/Usp49/Snrpe/Rnf113a2	60
BP	GO:0000398	mRNA splicing, via spliceosome	60/4218	210/20432	0.00373285	0.0376856	Wdr83/Bcas2/Lsm2/Snrpb2/Dqx1/Raver1/Rbm25/Nol3/Hspa8/Ddx39b/Sf3a2/Prpf8/Snw1/Ddx46/Mbnl2/Acin1/Khdrbs3/Zcrb1/Ncbp2/Srsf7/Prpf19/Sf1/Clns1a/Lmntd2/Snrpb/Rnpc3/Ptbp3/Psip1/Srsf10/Dhx15/Sfswap/Luc7l2/Strap/Snrpa1/Rbmx/Pqbp1/Rbpms/Lsm6/Dcps/Usp4/Rsrc1/Rbm17/Sf3b6/Slc39a5/Rbm7/Zrsr1/Lsm8/Npm1/Txnl4a/Gemin2/Hnrnpc/Snrpa/U2af1/Srpk2/Nhp2l1/Dazap1/Srsf3/Usp49/Snrpe/Rnf113a2	60
BP	GO:0009409	response to cold	14/4218	33/20432	0.00374117	0.0377016	Eif2ak4/Acadvl/Acadl/P2rx3/Fam175b/Rbm3/Adrb3/Eif2ak3/Slc27a1/Agt/Acot11/Metrnl/Acadm/Fcor	14
BP	GO:0006081	cellular aldehyde metabolic process	22/4218	61/20432	0.00386099	0.0388391	Shpk/Aldh3a2/Hsd11b1/Tkt/Dhrs4/Rbp4/Taldo1/Pnkd/Bmp2/Aldob/Pgd/Park7/H6pd/Dkk3/Bmp5/Tkfc/Gpi1/Bmp6/Rpia/Haghl/Rdh11/Adh1	22
BP	GO:0046777	protein autophosphorylation	65/4218	231/20432	0.00388805	0.0390411	Acvr1b/Grk5/Csnk1g2/Eif2ak4/Fgfr4/Tek/Cav1/Met/Cad/Chp1/Yes1/Hspa8/Nlk/Frk/Fyn/Mknk2/Vrk1/Ripk1/Gsk3b/Brd4/Pim1/Eif2ak2/Aatk/Pdgfa/Stk17b/Stk16/Nek6/Abl1/Srms/Pdgfc/Ntrk1/Epha7/Errfi1/Mtor/Tec/Pdgfra/Ulk1/Ephb4/Mvp/Fgfr1/Eif2ak3/Jak3/Mre11a/Pdgfd/Clk3/Atr/Phka1/Ctnnd1/Dapk3/Eef2k/Pim3/Enpp1/Camk4/Lmtk2/Htatip2/Prkd2/Prkca/Mapk14/Fgfr3/Ntrk2/Ptk2b/Erbb4/Kdr/Stk24/Nlrp12	65
BP	GO:0034330	cell junction organization	56/4218	194/20432	0.00391158	0.0392069	Rhoc/Pkn2/Wdr1/Pard6a/Tek/Cav1/Rhoa/Pten/Actn1/Ace2/Perp/Wdpcp/Marveld2/Ocln/Mtss1/Cldn1/Plec/Snai2/Pdpk1/Lama3/Nedd4l/Ptprj/Itgb1/Epb41l5/Itgav/Pip5k1a/Tln1/Macf1/Flna/Arhgap6/Cdh5/Agt/Phldb2/Dapk3/Prkci/Fermt2/Ctnna1/Rcc2/Cldn5/Rhod/S100a10/Fmn1/Plekha7/Whamm/Gjb2/Gja1/Prkca/Rap1b/Bcas3/Ptk2b/Flot1/Itgb1bp1/Kdr/Clasp1/Rap1a/Heg1	56
BP	GO:0051235	maintenance of location	76/4218	277/20432	0.00392877	0.0393088	Pparg/Gm2a/Hk2/Akt1/Sri/Grik5/Bax/Gstm7/Cyba/Atp7b/Cav1/Faf1/Plin5/Nol3/Lpl/Plcg1/Pfn1/Cry1/Srgn/Stat5b/Hexb/Fitm1/Ppara/Srebf2/Cd4/Pdpk1/Ehd1/Gsto1/Hexa/Get4/Gpr39/Dbi/Abl1/Itgav/F2/Tln1/Plin2/Htt/Slc30a3/Coro1a/Dgat2/Flna/Arl2bp/Polr2m/Ank2/Cxcl10/Arhgap21/Topors/4932438A13Rik/Enpp1/Scarb1/Crp/Os9/Abhd4/Tspo/Acacb/Zc3h12a/Hilpda/Prkce/Dmd/Slc25a23/Fitm2/Nrip1/Tpcn2/Sorl1/Tmsb4x/Slc30a7/Fto/Ptk2…	76
BP	GO:0001933	negative regulation of protein phosphorylation	100/4218	379/20432	0.00396171	0.0395676	Kat2b/Akt1/Chordc1/Cdkn1b/Dusp3/Bax/Ndrg2/Hspb1/Pard6a/Cav1/Bmp7/Met/Hyal2/Pten/Chp1/Lrrk1/Cnksr3/Gadd45b/Ace2/H2afy/Cdk5rap3/Irf1/Dcn/Psen1/Igf1/Pbld1/Rack1/Ube2b/Tnip1/Igfbp3/Pecam1/Slc9a3r1/Trim27/Hmgcr/Angpt1/Prkdc/Gsk3b/Cdkn1a/Rgn/Park2/Xdh/Pdpk1/Hdac3/Smad4/Ptprj/Rabgef1/Sirt3/Abl1/Pax6/Spred1/Pkia/Ptpn1/Adar/Cdkn2c/Podn/Hgf/Park7/Errfi1/Mtor/Hsph1/Strap/Mvp/Igbp1/Pin1/Nck1/Trib1/Traf3ip1/C…	100
BP	GO:0010817	regulation of hormone levels	119/4218	461/20432	0.00397856	0.0396651	Comt/Pparg/Sri/Cyp17a1/Cacna1e/Aqp1/G6pc2/Fgfr4/Kif5b/Mcu/Retn/Ace2/C1qtnf1/Cry1/Igf1/Srebf1/Stxbp4/Rasl10b/Stat5b/Gpld1/Glrx/Srd5a1/Hmgcr/Glud1/Ywhaz/Ly6e/Ece2/Park2/Cyp21a1/Smad4/Pcsk5/Cpt1a/Bad/Rbp4/Abcc2/Sirt3/Rptor/Map4k4/Gpr39/Glul/Mpc2/Lrp2/Pax6/Snap23/Bmp2/Gnas/Anxa5/Schip1/Stxbp3/Hadh/Enpep/Ppp3ca/Cd38/Htt/Pdgfra/Clock/Hsd17b11/Psmd9/Aacs/Atg7/Nucb2/Sult1a1/Dkk3/Stx4a/Atp6ap2/Serpina7/Ra…	119
BP	GO:0042775	mitochondrial ATP synthesis coupled electron transport	16/4218	40/20432	0.00406036	0.0404086	Cox5a/Ndufs6/Ndufb9/Ndufb8/Ndufa10/Park7/Coq7/Cox4i1/Cox8a/Ndufa7/Bdnf/Uqcr10/Uqcrh/ND2/ND4/CYTB	16
BP	GO:0003300	cardiac muscle hypertrophy	26/4218	76/20432	0.00409566	0.0406874	Gata6/Cdk9/Akap1/Ddx39b/Igf1/Fbxo32/Gsk3b/Smad4/Parp1/Ppp3ca/Errfi1/Mtor/Mef2a/Glrx3/Sorbs2/Nfatc3/Agt/Pin1/Hand2/Jarid2/Pde9a/Prkca/Pde5a/Ece1/Fdps/Akap13	26
BP	GO:0044091	membrane biogenesis	13/4218	30/20432	0.00413221	0.0409777	Cav2/Cav1/Pten/Pacsin2/Sptbn1/Emp2/Pex16/Lrp4/Exoc4/Pex11a/S100a10/Flot1/Ank3	13
BP	GO:0015711	organic anion transport	73/4218	265/20432	0.00416494	0.0412293	Pparg/Akt1/Slc1a5/Crot/Slc5a6/Pla2g12b/Slc38a3/Slc25a13/Serinc3/Slc13a3/Acsl1/Psen1/Slc16a7/Avpr1a/Slc1a4/Slc36a1/Acsl6/Slc9a3r1/Slc13a5/Slc46a1/Abcc3/Slc25a17/Slc10a2/Slc26a6/Slc23a1/Acsl5/Abcc2/Slc25a10/Agxt/Sept2/Mpc2/Slc27a2/Il1a/Slc2a2/Pla2g12a/Plin2/Htt/Slc10a6/Slc15a4/Abcg2/Slc6a12/Slco1b2/Slco1a4/Slc27a5/Slco2b1/Aqp8/Acsl4/Abcd1/Slc7a2/Slc27a1/Abcc4/P2ry2/Slc16a1/Myo6/Sfxn5/Slc26a2/Pnpla8…	73
BP	GO:0042147	retrograde transport, endosome to Golgi	23/4218	65/20432	0.00418096	0.0412896	Ap1s1/Snx6/Evi5/Vps53/Vps26a/Ankfy1/Vti1b/Trim27/Ehd3/Gbf1/Pikfyve/Snx5/Rgp1/Tbc1d14/Vps29/Vps35/Rab6b/Tbc1d10a/Plekhj1/Gcc2/Sgsm2/Ric1/Rab9	23
BP	GO:0000375	RNA splicing, via transesterification reactions	60/4218	211/20432	0.0041858	0.0412896	Wdr83/Bcas2/Lsm2/Snrpb2/Dqx1/Raver1/Rbm25/Nol3/Hspa8/Ddx39b/Sf3a2/Prpf8/Snw1/Ddx46/Mbnl2/Acin1/Khdrbs3/Zcrb1/Ncbp2/Srsf7/Prpf19/Sf1/Clns1a/Lmntd2/Snrpb/Rnpc3/Ptbp3/Psip1/Srsf10/Dhx15/Sfswap/Luc7l2/Strap/Snrpa1/Rbmx/Pqbp1/Rbpms/Lsm6/Dcps/Usp4/Rsrc1/Rbm17/Sf3b6/Slc39a5/Rbm7/Zrsr1/Lsm8/Npm1/Txnl4a/Gemin2/Hnrnpc/Snrpa/U2af1/Srpk2/Nhp2l1/Dazap1/Srsf3/Usp49/Snrpe/Rnf113a2	60
BP	GO:1904591	positive regulation of protein import	32/4218	99/20432	0.00428057	0.04215	Tek/Dmap1/Hyal2/Igf1/Hsp90aa1/Bmpr1a/Hcls1/Hsp90ab1/Bambi/Hdac3/Smad4/Parp1/Rbck1/Tlr2/Ppp3ca/Tnfrsf1a/Chp2/Flna/Rbpms/Nup93/Ppp3r1/Uaca/Bmp6/Tlr4/Il18/Ddx58/Pik3r1/Zc3h12a/Tlr7/Mapk14/Erbb4/Nlrp12	32
BP	GO:1905037	autophagosome organization	27/4218	80/20432	0.00430582	0.0423242	Atg4d/Rab23/Ehmt2/Phf23/Psen1/Nprl3/Scfd1/Atg2a/Rb1cc1/Pikfyve/Map1lc3a/Tbc1d14/Ulk1/Gabarapl1/Atg7/Map1lc3b/Gabarapl2/Atg12/Trappc8/Becn1/Sh3glb1/Atg101/Ambra1/Wipi1/Emc6/Atg16l2/Fez2	27
BP	GO:0016241	regulation of macroautophagy	28/4218	84/20432	0.00449611	0.0439708	Hk2/Ubqln4/Ehmt2/Sqstm1/Phf23/Atp6v0a1/Dcn/Nprl3/Scfd1/Sptlc2/Bnip3l/Rab12/Wac/Rnf41/Pikfyve/Tlr2/Mtor/Tbc1d14/Ulk1/Atg7/Trim13/Sh3glb1/Ambra1/Epm2a/Fez2/Trp53/Kdr/Bnip3	28
BP	GO:0044264	cellular polysaccharide metabolic process	28/4218	84/20432	0.00449611	0.0439708	Akt1/Gnmt/Ppp1cb/Igf1/Pygl/Gbe1/Gsk3b/Pcdh12/Dyrk2/Mtor/Gfpt1/Gys2/Phka2/B3gnt3/Agl/Phka1/Phkb/Enpp1/Ppp1ca/Ppp1r2/Stbd1/Adra1b/Epm2a/Per2/Ext1/Acadm/Ppp1r3c/Ptges3	28
BP	GO:0045786	negative regulation of cell cycle	91/4218	342/20432	0.00450252	0.0439708	Tom1l2/Kat2b/Med25/Cdkn1b/Ier3/Calr/Zak/Prcc/Eif2ak4/Gata6/Susd2/Cdk4/Bmp7/Cdk9/Rassf1/Pten/H2afy/Cdk5rap3/Irf1/Ddx39b/Fbxo5/E2f7/Hus1/Pnpt1/Slc9a3r1/Jmy/Trim35/Rad1/Mtbp/Prkdc/Cdkn1a/Rps6ka2/Prpf19/Uhrf2/Ovol1/Stag2/Nabp1/Cdc73/Irf6/Abl1/Bmp2/Skil/Fbxw7/Rps6/Cdkn2c/Rpa2/Slc25a33/Rint1/Apbb2/Mad1l1/Mad2l1/Xpc/Ing4/Gas2/Blm/Nupr1/Rrp8/Hpgd/Mre11a/Chek1/Kank2/Zw10/Nme6/Gadd45gip1/Recql4/Thoc5/Gadd4…	91
BP	GO:0001573	ganglioside metabolic process	4218-12-01	27/20432	0.00451869	0.0439708	Gm2a/Hexb/St3gal6/Hexa/Itgb8/St3gal3/St3gal4/Cln6/Neu3/St3gal5/Neu2/St6galnac4	12
BP	GO:1901890	positive regulation of cell junction assembly	4218-12-01	27/20432	0.00451869	0.0439708	Tek/Cav1/Ace2/Cldn1/Ptprj/Epb41l5/Agt/S100a10/Fmn1/Flot1/Itgb1bp1/Kdr	12
BP	GO:0032970	regulation of actin filament-based process	87/4218	325/20432	0.00452051	0.0439708	Sri/Cnn2/Wdr1/Tek/Cav1/Rhoa/Capza2/Eps8/Dstn/Celsr1/Crk/Pfn1/Hdac2/Wasf1/Ctgf/Actr2/Sptbn1/Pecam1/Trim27/Carmil1/Ctsl/Rasa1/Jmy/Mtss1/Myh9/Hcls1/Lima1/Park2/Dsc2/Baiap2/Stau2/Pam/Abl1/Neb/Mkks/Il1a/Pde4b/Sh3bgrl3/Arhgef19/Mtor/Stap1/Limk1/Lmod2/Arhgdib/Nox4/Coro1a/Flna/Arhgap6/Mylk3/Kank2/Tpm1/Nck1/Arap1/Ank2/Ppp1r9a/Phldb2/Brk1/Fhod3/Dapk3/Fxyd1/Grhl3/Prex1/Pik3r1/Kcnj2/Rhod/S100a10/Fmn1/Prkce/S…	87
BP	GO:1901987	regulation of cell cycle phase transition	62/4218	220/20432	0.00454595	0.0441415	Akt1/Paxip1/Cdkn1b/Ier3/Phb2/Rab11a/Susd2/Cdk4/Pten/H2afy/Cdk5rap3/E2f7/Hus1/Stxbp4/Ctc1/Tert/Psme1/Mtbp/Prkdc/App/Cdkn1a/Brd4/Ercc3/Prpf19/Ovol1/Cdc73/Nek6/E2f1/Pkia/Anp32b/Rpa2/Rint1/Anapc4/Mad1l1/Mad2l1/Xpc/Blm/Pagr1a/Cul4b/Mre11a/Chek1/Kank2/Zw10/Ino80/Tjp3/Plk5/Cdkn1c/Atf5/Rcc2/Sin3a/Pid1/Lsm10/Plcb1/Fbxo31/Mta3/Npm1/Ube2e2/Trp53/Rpl17/Hacd1/Cdc26/Ccnd1	62
BP	GO:0001881	receptor recycling	15/4218	37/20432	0.00458991	0.0444911	Gria3/Psen1/Ehd3/Chmp5/Eps15/Nsg1/Lamtor1/Arap1/Nsf/Plekhj1/Lmtk2/Pcsk9/Agtr1a/Ece1/Rab11b	15
BP	GO:0006261	DNA-dependent DNA replication	36/4218	115/20432	0.00462063	0.0446972	Ccne1/Mcm2/Dnaja3/Mcm5/Cdk9/E2f7/Pold2/Wrnip1/Parp3/Peo1/Stag2/Prim2/Mcm6/Parp1/Gins1/Rtfdc1/Fbxw7/Ccne2/Tex10/Slc25a33/Rfc5/Blm/Fgfr1/Gins2/Mre11a/Bmp5/Rfc3/Ino80/Parp2/Primpol/Mcm3/Pura/Pid1/Mms22l/E2f8/Upf1	36
BP	GO:0038061	NIK/NF-kappaB signaling	19/4218	51/20432	0.00465994	0.0446972	Relb/Calr/Tek/Glrx/Eif2ak2/Nfkb2/Adipor1/Tlr2/Rps3/Akip1/Smpd3/Agt/Birc3/Uaca/Tlr4/Ago1/Chil1/Mas1/Nlrp12	19
BP	GO:0006818	hydrogen transport	29/4218	88/20432	0.00466711	0.0446972	Atp5f1/Tcirg1/Atp5d/Atp4a/Atp6v1b2/Chp1/Atp6v0e/Atp5g3/Atp6v0a1/Slc36a1/Slc9a3r1/Slc46a1/Ppif/Atp6v1c1/Atp5b/Nnt/Atp5c1/Adhfe1/Atp6v0d2/Park7/Cox7b/Atp6v0b/Cox8a/Atp5l/Atp1a3/Atp5k/Plcb1/ATP6/CYTB	29
BP	GO:0009086	methionine biosynthetic process	4218-07-01	12/20432	0.00469908	0.0446972	Mri1/Apip/Adi1/Mthfd1/Cth/Mthfr/Bhmt	7
BP	GO:0010878	cholesterol storage	4218-07-01	12/20432	0.00469908	0.0446972	Pparg/Lpl/Ppara/Srebf2/Ehd1/Scarb1/Nr1h2	7
BP	GO:0019054	modulation by virus of host process	4218-07-01	12/20432	0.00469908	0.0446972	Eif2ak4/Cd4/Park2/Bad/Atg7/Zc3h12a/Ccr5	7
BP	GO:0042761	very long-chain fatty acid biosynthetic process	4218-07-01	12/20432	0.00469908	0.0446972	Elovl1/Elovl2/Tecr/Hacd3/Elovl3/Elovl6/Hacd1	7
BP	GO:0046479	glycosphingolipid catabolic process	4218-07-01	12/20432	0.00469908	0.0446972	Gm2a/Hexb/Hexa/Gba2/Gla/Neu3/Neu2	7
BP	GO:0051764	actin crosslink formation	4218-07-01	12/20432	0.00469908	0.0446972	Actn1/Eps8/Pls3/Cobl/Lcp1/Baiap2/Flna	7
BP	GO:0071295	cellular response to vitamin	4218-07-01	12/20432	0.00469908	0.0446972	Snw1/Snai2/Pim1/Pdia3/Postn/Gas6/Kank2	7
BP	GO:1901298	regulation of hydrogen peroxide-mediated programmed cell death	4218-07-01	12/20432	0.00469908	0.0446972	Met/Glrx/Hgf/Park7/Hsph1/Hdac6/Foxo3	7
BP	GO:0006687	glycosphingolipid metabolic process	17/4218	44/20432	0.00473027	0.0448414	Gm2a/Bax/Psap/Hexb/St3gal6/Hexa/Itgb8/Gba2/St3gal3/Gla/St3gal4/Cln6/Neu3/St3gal5/Crem/Neu2/St6galnac4	17
BP	GO:0006754	ATP biosynthetic process	17/4218	44/20432	0.00473027	0.0448414	Atp5f1/Tcirg1/Atp5d/Slc25a13/Atp5g3/Atp6v0a1/Park2/Atp5b/Atp5c1/Vcp/Gbas/Atp5l/Pklr/Pid1/Chchd10/Atp5k/ATP6	17
BP	GO:0098779	mitophagy in response to mitochondrial depolarization	40/4218	131/20432	0.00478221	0.0451806	Hk2/Hsf2bp/Tmem39a/Nr2c2/Sqstm1/Myh11/Slc1a4/Pex13/Hapln1/Acin1/Ndufb9/Mylk/Chaf1b/Park2/Slc22a3/Pi4k2a/Atp1b1/Snrpb/Anxa5/Alpk1/Ulk1/Hdac6/Car7/Nup93/Becn1/Cox8a/Fam13b/Mbd5/Mex3c/Smurf1/Supt3/Zfp189/Stat2/Ambra1/Prkd2/Trem1/Akr1e1/Txlna/Fabp1/Tmem203	40
BP	GO:0098780	response to mitochondrial depolarisation	40/4218	131/20432	0.00478221	0.0451806	Hk2/Hsf2bp/Tmem39a/Nr2c2/Sqstm1/Myh11/Slc1a4/Pex13/Hapln1/Acin1/Ndufb9/Mylk/Chaf1b/Park2/Slc22a3/Pi4k2a/Atp1b1/Snrpb/Anxa5/Alpk1/Ulk1/Hdac6/Car7/Nup93/Becn1/Cox8a/Fam13b/Mbd5/Mex3c/Smurf1/Supt3/Zfp189/Stat2/Ambra1/Prkd2/Trem1/Akr1e1/Txlna/Fabp1/Tmem203	40
BP	GO:0014068	positive regulation of phosphatidylinositol 3-kinase signaling	22/4218	62/20432	0.00483754	0.0455494	Tek/Fyn/Dcn/Igf1/Angpt1/Hcls1/Agap2/Pdgfa/F2/Pdgfc/Hgf/Agt/Pdgfd/Cbl/Prr5/Rara/Serpina12/Reln/Plxnb1/Ntrk2/Erbb4/Kdr	22
BP	GO:0061178	regulation of insulin secretion involved in cellular response to glucose stimulus	22/4218	62/20432	0.00483754	0.0455494	Sri/Cacna1e/Kif5b/Stxbp4/Gpld1/Hmgcr/Park2/Bad/Map4k4/Gpr39/Mpc2/Atg7/Stx4a/Adra2a/Pim3/Pla2g6/Prkce/Gpr68/Jagn1/Lepr/Hmgn3/Mup1	22
BP	GO:0017144	drug metabolic process	4218-11-01	24/20432	0.00487377	0.0457366	Cad/Abcc2/Cyp2e1/Fmo3/Fmo4/Cyp4b1/Dck/Sult1a1/Cyp1a2/Fmo2/Cbr1	11
BP	GO:2000772	regulation of cellular senescence	4218-11-01	24/20432	0.00487377	0.0457366	Eef1e1/Pnpt1/Tert/Bmpr1a/Nek4/Prkdc/Abl1/Terf2/Arntl/Zfp277/Trp53	11
BP	GO:0048144	fibroblast proliferation	32/4218	100/20432	0.0050721	0.0473701	Pparg/Emd/Med25/Bax/Aqp1/Cdk4/Zmiz1/Wnt2/Igf1/Ctc1/Rasa1/Xrcc4/Prkdc/Cdkn1a/Pdgfa/Cdc73/E2f1/Pdgfc/Rps3a1/Pdgfra/Nupr1/Gas6/Ifi30/Agt/Pdgfd/Fntb/Cd300a/Serpine1/Wapl/Trp53/Parp10/Btc	32
BP	GO:0071396	cellular response to lipid	106/4218	408/20432	0.00512043	0.0473701	Pparg/Akt1/Nr2f6/Calr/Phb2/Aqp1/Nr1i3/Nr2c2/Shpk/Cdk4/Rhoa/Bmp7/Med16/Yes1/Abca1/Rxrg/Med24/Cxcl16/Pdk4/Sgk1/Cry1/Igf1/Prpf8/Snw1/Gpld1/Glrx/Med4/Mtdh/Fbxo32/Ppara/Snai2/Calcoco1/Pim1/Bad/Stat1/Cdc73/Parp1/Mrc1/Nr4a2/Abl1/Pdia3/Cyp7a1/Pde4b/Park7/Clock/Stap1/Fkbp4/Pagr1a/Dgat2/Nr3c2/Med17/Smarca4/Ldlr/Kank2/Plscr4/Trip4/Trib1/Uba5/Klf9/Cxcl10/Ccl2/Spon2/Serpine1/Nr0b2/H2afz/Rara/Cd84/Ube2l3/Bmp6/…	106
BP	GO:0009063	cellular amino acid catabolic process	20/4218	55/20432	0.0051486	0.0473701	Ftcd/Prodh/Pah/Csad/Gldc/Got1/Agxt/Ppat/Hpd/Aass/Fah/Got2/Bckdhb/Amt/Cdo1/Gcsh/Uroc1/Aspg/Fam206a/Ddo	20
BP	GO:0009206	purine ribonucleoside triphosphate biosynthetic process	20/4218	55/20432	0.0051486	0.0473701	Atp5f1/Tcirg1/Atp5d/Slc25a13/Atp5g3/Atp6v0a1/Pnp/Park2/Atp5b/Atp5c1/Vcp/Gbas/Nme6/Atp5l/Pklr/Pid1/Chchd10/Atp5k/Impdh2/ATP6	20
BP	GO:0006144	purine nucleobase metabolic process	4218-10-01	21/20432	0.00515462	0.0473701	Ada/Xdh/Urah/Uox/Paics/Acpp/Dpyd/Kdm1a/Gda/Aox1	10
BP	GO:0032770	positive regulation of monooxygenase activity	4218-10-01	21/20432	0.00515462	0.0473701	Akt1/Fcer2a/Tert/Dhfr/Npr3/Park7/Terf2/Gch1/Scarb1/Ptk2b	10
BP	GO:0032801	receptor catabolic process	4218-10-01	21/20432	0.00515462	0.0473701	Lgmn/Capn1/Ptpn1/Becn1/Sh3glb1/Mylip/Snx25/Smurf1/Gprasp1/Pcsk9	10
BP	GO:0034377	plasma lipoprotein particle assembly	4218-10-01	21/20432	0.00515462	0.0473701	Abca1/Apom/Fech/Apoa5/Acsl3/Lcat/Plagl2/Ces1d/Ces1g/Nr1h2	10
BP	GO:0070584	mitochondrion morphogenesis	4218-10-01	21/20432	0.00515462	0.0473701	Bax/Supv3l1/Pnpt1/Ndufs6/Mff/Coq7/Myh14/Nubpl/Pid1/Mup1	10
BP	GO:0032434	regulation of proteasomal ubiquitin-dependent protein catabolic process	33/4218	104/20432	0.00517406	0.0473701	Akt1/Rad23a/Rnf114/Ubqln4/Psen1/Rack1/Rnf144a/Nkd2/Rnf19a/Gsk3b/Park2/Axin1/Wac/Rnf138/Bag6/Arih1/Vcp/Park7/Atg7/Gclc/Trib1/Rnf125/Ccar2/Prickle1/Rnf144b/Stub1/Ufl1/Rfwd2/Usp14/Zfand2a/Rnf217/Ubxn1/Taf9	33
BP	GO:0060395	SMAD protein signal transduction	23/4218	66/20432	0.0051855	0.0473701	Bmp7/Fos/Meg3/Gdf10/Bmp1/Lnpep/Smad4/Hexa/Bmp2/Nceh1/Smad9/Slc33a1/Bmp5/Stoml1/Nup93/Atoh8/Gdf15/Lefty1/Bmp6/Inhba/Gdf6/Afp/Gdf2	23
BP	GO:0006544	glycine metabolic process	4218-08-01	15/20432	0.00519182	0.0473701	Dhfr/Gldc/Shmt2/Agxt/Amt/Gcsh/Fam206a/Baat	8
BP	GO:0006895	Golgi to endosome transport	4218-08-01	15/20432	0.00519182	0.0473701	Ap4m1/Gbf1/Rab14/Eps15/Wipi1/Tgoln1/Tgoln2/Sort1	8
BP	GO:0007035	vacuolar acidification	4218-08-01	15/20432	0.00519182	0.0473701	Snapin/Tcirg1/Atp6v0a1/Cln5/Atp6v0d2/Cln6/Atp6v0b/Clic4	8
BP	GO:0070254	mucus secretion	4218-08-01	15/20432	0.00519182	0.0473701	Cyba/Ada/Atg7/Map1lc3b/P2ry2/Adora1/Prkce/Vamp8	8
BP	GO:1900101	regulation of endoplasmic reticulum unfolded protein response	4218-08-01	15/20432	0.00519182	0.0473701	Bax/Ptpn1/Nck1/Tmem33/Wfs1/Pik3r1/Bak1/Nck2	8
BP	GO:1902187	negative regulation of viral release from host cell	4218-08-01	15/20432	0.00519182	0.0473701	Trim25/Trim11/Trim27/Trim35/Trim26/Trim8/Trim13/Chmp3	8
BP	GO:0014896	muscle hypertrophy	27/4218	81/20432	0.0052114	0.0474713	Gata6/Cyba/Cdk9/Akap1/Ddx39b/Igf1/Fbxo32/Gsk3b/Smad4/Parp1/Ppp3ca/Errfi1/Mtor/Mef2a/Glrx3/Sorbs2/Nfatc3/Agt/Pin1/Hand2/Jarid2/Pde9a/Prkca/Pde5a/Ece1/Fdps/Akap13	27
BP	GO:0090316	positive regulation of intracellular protein transport	66/4218	238/20432	0.00525917	0.0478285	Emd/Tek/Kif5b/Dmap1/Hyal2/Igf1/Ppm1a/Hsp90aa1/Bmpr1a/Srebf2/Gsk3b/Hcls1/Slc17a9/Hsp90ab1/Bambi/Hdac3/Smad4/Huwe1/Parp1/Hnmt/Rbck1/Tlr2/Fbxw7/Ppp3ca/Rufy3/Cdkl2/Tnfrsf1a/Psmd8/Itgax/Chp2/Flna/Gas6/Rbpms/Ablim3/Nup93/Usp36/Ppp3r1/Tmem30b/Uaca/Oaz1/Ccl2/Sh3glb1/Camk4/Edem2/Ube2l3/Bmp6/Tlr4/Il18/Ddx58/Pik3r1/Zc3h12a/Tlr7/Sorl1/Snip1/Kcnb1/Plagl2/Mapk14/Bcas3/Erbb4/Itgb1bp1/Htra2/Ank3/B3gat3/Wipf1/Ube…	66
BP	GO:0019682	glyceraldehyde-3-phosphate metabolic process	4218-09-01	18/20432	0.00529449	0.0478385	Shpk/Hsd11b1/Tkt/Taldo1/Aldob/Pgd/H6pd/Tkfc/Rpia	9
BP	GO:0045723	positive regulation of fatty acid biosynthetic process	4218-09-01	18/20432	0.00529449	0.0478385	Apoc2/Mid1ip1/Avpr1a/Srebf1/Rgn/Slc45a3/Agt/Apoa5/Nr1h2	9
BP	GO:0070861	regulation of protein exit from endoplasmic reticulum	4218-09-01	18/20432	0.00529449	0.0478385	Derl3/Ube2g2/Derl2/Erlec1/Tmem30b/Gcc2/Edem2/Os9/Sorl1	9
BP	GO:2001026	regulation of endothelial cell chemotaxis	4218-09-01	18/20432	0.00529449	0.0478385	Hspb1/Met/Snai2/Cxcl13/Fgfr1/Fgf1/Thbs1/Prkd2/Kdr	9
BP	GO:0065002	intracellular protein transmembrane transport	18/4218	48/20432	0.00536094	0.0483608	Timm44/Tomm40/Tomm40l/Timm23/Pex12/Pex7/Pex13/Timm9/Hsp90aa1/Tomm22/Grpel2/Timm21/Zfand2b/Timm10/Pex16/Timm17b/Chchd4/Tomm20	18
BP	GO:0042991	transcription factor import into nucleus	28/4218	85/20432	0.00540842	0.0487106	Sri/Rab23/Dmap1/Faf1/Nol3/Akap1/Ppm1a/Gsk3b/Hcls1/Hdac3/Rbck1/Tlr2/Ppp3ca/Dyrk2/Prdx1/Mtor/Flna/Ppp3r1/Uaca/Tlr4/Il18/Ddx58/Pik3r1/Ipo9/Ipo11/Zc3h12a/Tlr7/Nlrp12	28
BP	GO:0032886	regulation of microtubule-based process	46/4218	156/20432	0.00545214	0.0490254	Chordc1/Cdkn1b/Chmp2b/Cav1/Rhoa/Mid1ip1/Rassf1/Sgk1/Xpo1/Cep97/Gsk3b/Dst/Abl1/Mkks/Chmp5/Macf1/Stmn1/Hsph1/Fkbp4/Rps3/Hdac6/Igbp1/Bbs2/Katnb1/Cfap20/Chek1/Phldb2/Traf3ip1/Slain2/Cep250/Atf5/Rassf7/Cdk5rap2/Mcph1/Eml2/Pkhd1/2900011O08Rik/Phldb1/Cep120/Chmp3/Npm1/Gda/Memo1/Cenpj/Clasp1/Ccnf	46
BP	GO:0043254	regulation of protein complex assembly	90/4218	340/20432	0.00547756	0.0491749	Psmc3/Paxip1/Med25/Cdkn1b/Bax/Crbn/Fblim1/Cav1/Rhoa/Faf1/Nol3/Capza2/Eps8/Bik/Pfn1/Wasf1/Sgk1/Cand1/Actr2/Sptbn1/Rack1/Psmc5/Pecam1/Ppm1a/Trim27/Carmil1/Rasa1/Jmy/Lcp1/Gsk3b/Hcls1/Cxcl13/Eif2ak2/Fas/Baiap2/Parp1/Abl1/Mkks/Vps16/Vcp/Stmn1/Mtor/Ulk1/Lmod2/Fkbp4/Coro1a/Rps3/Hdac6/Hcfc1/Tpm1/Nck1/Kif9/Ppp1r9a/Brk1/Farp2/Traf3ip1/Fhod3/Ankrd27/Bbs10/Fnip1/Slain2/Sh3glb1/Lefty1/Tlr4/Stub1/Prex1/Xaf1/Em…	90
BP	GO:0051271	negative regulation of cellular component movement	69/4218	251/20432	0.00550143	0.0491753	Apoh/Serpinf1/Sema6b/Cdkn1b/Cnn2/Rhoa/Hyal2/Fuz/Pten/Actn1/Cers2/Nfe2l2/Stard13/Ada/Dcn/Pbld1/Igfbp3/Slc9a3r1/Bmpr1a/Nisch/Gsk3b/Hrg/Robo1/Rgn/Cxcl13/Csnk2b/Sema4g/Ptprj/Rabgef1/Rnf41/Adipor1/Pdcd10/Sema4a/Podn/Ptpru/Stap1/Arhgdib/Strap/Idh2/Arhgap4/Adgrg1/Pin1/Tpm1/Trib1/Ryk/Phldb2/Tie1/Cd300a/Scai/Clic4/Serpine1/Ctnna1/Rras/Abhd2/Cited2/Thbs1/Adora1/2900011O08Rik/Plcb1/Sema5b/Rhob/Sema3b/Cxcl12…	69
BP	GO:0042770	signal transduction in response to DNA damage	24/4218	70/20432	0.00550207	0.0491753	Eef1e1/Pttg1ip/E2f7/Prkdc/Snai2/Cdkn1a/Prpf19/Abl1/Spred1/Rint1/Mad2l2/Triap1/Ing4/Pgap2/Atr/Myo6/Gadd45a/Kdm1a/Foxo3/Bcl3/Mapk14/Pla2r1/Npm1/Trp53	24
BP	GO:0070507	regulation of microtubule cytoskeleton organization	39/4218	128/20432	0.00550397	0.0491753	Chordc1/Cdkn1b/Chmp2b/Cav1/Rhoa/Mid1ip1/Rassf1/Sgk1/Xpo1/Cep97/Dst/Abl1/Chmp5/Stmn1/Hsph1/Fkbp4/Rps3/Hdac6/Katnb1/Chek1/Phldb2/Traf3ip1/Slain2/Cep250/Atf5/Rassf7/Cdk5rap2/Mcph1/Eml2/Pkhd1/2900011O08Rik/Phldb1/Cep120/Chmp3/Npm1/Gda/Cenpj/Clasp1/Ccnf	39
BP	GO:0009749	response to glucose	42/4218	140/20432	0.00552627	0.0492957	Sri/Cacna1e/Kif5b/Igf1/Rack1/Srebf1/Stxbp4/Gpld1/Hmgcr/Park2/Bad/Map4k4/Gpr39/Glul/Mpc2/Casp6/Ppp3ca/Cyp7a1/Eif2b3/Eif2b1/Aacs/Gys2/Atg7/Nox4/Stx4a/Gas6/Smarca4/Adra2a/Pim3/Nr0b2/Thbs1/Sin3a/Pla2g6/Prkce/Gpr68/Kcnb1/Jagn1/Lepr/Gpx1/Hmgn3/Rab11b/Mup1	42
BP	GO:1901699	cellular response to nitrogen compound	109/4218	422/20432	0.00553714	0.049314	Cav2/Pparg/Hnrnpd/Kat2b/Col1a1/Akt1/Prkra/Gstm7/Aqp1/Nsmf/Cdk4/Cav1/Ehmt2/Slc2a4/Irf1/Pdk4/Hdac2/Sgk1/Hsp90b1/Igf1/Eif4ebp2/Cpeb4/Srebf1/Stxbp4/Rab10/Recql5/Stat5b/Gpld1/Tert/Drosha/Rangap1/Ly6e/Prkdc/Dgcr8/App/Slc26a6/Ubr2/Pdpk1/Mzb1/Bad/Baiap2/Rptor/Cpeb1/Stat1/Mrpl44/Adipor1/Parp1/Nr4a2/Gnas/Ptpn1/Car2/Chrna4/Anxa5/Adar/Tlr2/Pdgfc/Ntrk1/Ppp3ca/Pde4b/Ybx1/Pik3r3/Slc25a33/Pdgfra/Ncor2/Zc3hav1/Bl…	109
BP	GO:0022904	respiratory electron transport chain	21/4218	59/20432	0.005599	0.0495493	Cox5a/Slc25a13/Ndufs6/Ndufb9/Ndufb8/Ndufa10/Park7/Coq7/Cox4i1/Cox8a/Mybbp1a/Ndufa7/Bdnf/Uqcr10/Uqcrh/ND2/COX3/ND4/ND5/CYTB/ND4L	21
BP	GO:0032418	lysosome localization	21/4218	59/20432	0.005599	0.0495493	Snapin/Stxbp2/Ywhaz/Pdpk1/Rabgef1/Snap23/Plekhm2/Vps33a/Tmem106b/Arl8b/Il4ra/Lamtor1/Hdac6/Il13ra2/Cd300a/Cd84/Borcs6/Vamp8/Kxd1/Bloc1s2/Unc13d	21
BP	GO:0042308	negative regulation of protein import into nucleus	21/4218	59/20432	0.005599	0.0495493	Emd/Sri/Rab23/Faf1/Chp1/Akap1/Pbld1/Slc9a3r1/Ppm1a/Angpt1/Snai2/Gsk3b/Pkia/Dyrk2/Mtor/Gas6/Uaca/Zc3h12a/Ei24/Parp10/Nlrp12	21
BP	GO:1904590	negative regulation of protein import	21/4218	59/20432	0.005599	0.0495493	Emd/Sri/Rab23/Faf1/Chp1/Akap1/Pbld1/Slc9a3r1/Ppm1a/Angpt1/Snai2/Gsk3b/Pkia/Dyrk2/Mtor/Gas6/Uaca/Zc3h12a/Ei24/Parp10/Nlrp12	21
BP	GO:0051604	protein maturation	68/4218	247/20432	0.00560971	0.0495657	Apoh/Snapin/Tspan33/Lmf1/Atg4d/Ihh/Fuz/Nol3/Tmem208/Ace2/Plgrkt/Perp/Psen1/Rfx4/Srgn/Pcsk4/Lgmn/Ctsl/Nkd2/Spcs1/Cln5/Myh9/Lmf2/Ece2/Rps6ka2/Pcsk5/Rce1/Capn1/Bad/Casp7/Cpn1/Prdx4/Iscu/Rhbdd1/Serpine2/Cd55/Parp1/Enpep/F3/Tmem59/Disp1/Atp6ap2/Klkb1/F11/Vps35/Birc3/Ctsh/Ctnnd1/Chchd4/Tbc1d10a/Rnf139/Serpine1/Ift172/Stub1/Thbs1/Immp1l/Pcsk9/Ctla2a/Isca1/Angptl8/Ldlrad3/Sorl1/Adam10/Ide/Ece1/Bak1/Fxn/C…	68
CC	GO:0044391	ribosomal subunit	102/4257	158/20678	3.7035e-33	2.38505e-30	Rpl13/Mrpl2/Rps11/Rpl8/Rps9/Rplp1/Rps18/Rpl10/Rps15a/Rps25/Rpl15/Rps5/Rpl19/Rack1/Rps27a/Mrps24/Mrpl13/Mrpl39/Mrps23/Mrpl28/Rps14/Rps24/Rps26/Rplp2/Mterf4/Mrps5/Rps3a1/Rps20/Rps6/Mrps15/Rpl22/Mrpl20/Rpl6/Mrpl51/Mrps11/Rps3/Mrpl17/Rbm3/Rps4x/Rpl4/Rpsa/Mrpl3/Mrpl15/Mrpl34/Rps29/Rps16/Mrps26/Rpl10a/Rpl12/Rps21/Rpl22l1/Mrpl12/Mrps28/Rps19/Rpl21/Rpl37/Rpl7/Rps2/Rpl18a/Rpl37a/Rpl27a/Rpl9/Rps8/Rpl29/Rps…	102
CC	GO:0022626	cytosolic ribosome	78/4257	105/20678	3.44511e-32	1.10932e-29	Rpl13/Rps11/Rpl8/Eif2ak4/Rps9/Rplp1/Rps18/Rpl10/Rps15a/Rps25/Rpl15/Rps5/Rpl19/Rps27a/Rps14/Rps24/Rps26/Rplp2/Rps3a1/Rps20/Rps6/Rpl22/Rpl6/Rps3/Rps4x/Rpl4/Rpsa/Rps29/Rps16/Rpl10a/Rpl12/Rps21/Rpl22l1/Rps19/Rpl21/Rpl37/Rpl7/Rps2/Rpl18a/Rpl37a/Rpl27a/Rpl9/Rps8/Rpl29/Rps23/Rps10/Zfp622/Rpl32/Rpl32l/Rpl36/Rpl23a/Rpl5/Rpl18/Rpl11/Rpl3/Rpl35a/Rpl26/Rps7/Rps17/Rps12/Rpl34/Rpl17/Rpl7a/Rpl35/Rpl27/Rps15/Rpl…	78
CC	GO:0005840	ribosome	119/4257	210/20678	1.19798e-30	2.57166e-28	Rpl13/Mrpl2/Rps11/Rpl8/Eif2ak4/Rps9/Rplp1/Rps18/Rpl10/Rps15a/Rps25/Rpl15/Rps5/Rpl19/Mrpl24/Rack1/Rps27a/Mrps24/Mrps30/Mrpl13/Mrpl39/Mrps23/Mrpl28/Rps14/Rps24/Rps26/Rplp2/Mrpl44/Mterf4/Mrps5/Rrbp1/Rps3a1/Mrpl9/Rps20/Rps6/Mrps15/Rpl22/Mrpl20/Rpl6/Mrpl51/Prmt3/Mrps11/Rps3/Mrpl17/Rbm3/Rps4x/Rpl4/Nck1/Rpsa/Mrpl3/Gadd45gip1/Mrpl15/Mrpl34/Rps29/Eef2/Mrpl55/Rps16/Mrps26/Rpl10a/Abcf1/Mrps34/Rpl12/Rps21/Rp…	119
CC	GO:0005743	mitochondrial inner membrane	168/4257	397/20678	3.39134e-23	5.46005e-21	Cox5a/Sdhd/Atp5f1/Spg7/Slc25a42/Timm44/Atp5d/Prodh/Slc25a1/Phb2/Mtfp1/Letm1/Cnp/Fpgs/Mcu/Aldh3a2/Ndufs2/Timm23/Slc25a13/Clpx/Ndufa1/Cox7c/Cyb5r3/Akap1/Acadvl/Slc25a35/Atp5g3/Fdxr/Mdh2/Pdk4/Psen1/Timm13/Rsad2/Eral1/Timm9/Slc25a48/Ndufs6/Glud1/Ppif/Micu2/Slc25a30/Ndufb9/Tomm22/Cyc1/Cpox/Mtch1/Ndufv3/Eci1/Cox7a2l/Grpel2/Fech/Timm21/Slc25a45/Pcx/Cpt1a/Acsl5/Ndufb8/Atp5b/Shmt2/Nnt/Sirt3/Hadha/Tyms/Atp…	168
CC	GO:0022625	cytosolic large ribosomal subunit	47/4257	59/20678	3.45782e-22	4.45368e-20	Rpl13/Rpl8/Rplp1/Rpl10/Rpl15/Rpl19/Rplp2/Rpl22/Rpl6/Rpl4/Rpl10a/Rpl12/Rpl22l1/Rpl21/Rpl37/Rpl7/Rpl18a/Rpl37a/Rpl27a/Rpl9/Rpl29/Zfp622/Rpl32/Rpl32l/Rpl36/Rpl23a/Rpl5/Rpl18/Rpl11/Rpl3/Rpl35a/Rpl26/Rps12/Rpl34/Rpl17/Rpl7a/Rpl35/Rpl27/Rpl7l1/Rplp0/Rpl23/Rpl31/Rpl13a/Rpl36a/Rpl39/Uba52/Gm5093	47
CC	GO:0044445	cytosolic part	107/4257	214/20678	7.43799e-22	7.98344e-20	Rpl13/Snapin/Psmc3/Rps11/Rpl8/Eif2ak4/Rps9/Cct4/Rplp1/Ubqln4/Rps18/Rpl10/Rps15a/Rps25/Rpl15/Rps5/Hps5/Rpl19/Rps27a/Rrm2/Psmc5/Ripk1/Cct5/Gsdmd/Bag6/Rps14/Pi4k2a/Hps1/Pfkfb1/Rps24/Rps26/Rplp2/Cct8/Get4/Gucy1b3/Rps3a1/Rps20/Rps6/Rpl22/Rpl6/Rps3/Rrm1/Rps4x/Rpl4/Rpsa/Uaca/Rps29/Rps16/Rpl10a/Rpl12/Rps21/Rpl22l1/Rps19/Rpl21/Rpl37/Gucy2c/Rpl7/Rps2/Rpl18a/Rpl37a/Rpl27a/Rpl9/Rps8/Eno4/Rpl29/Rps23/Rps10/Zf…	107
CC	GO:0019866	organelle inner membrane	177/4257	438/20678	1.0193e-21	9.37752e-20	Cav2/Cox5a/Sdhd/Atp5f1/Spg7/Emd/Slc25a42/Timm44/Atp5d/Prodh/Slc25a1/Phb2/Mtfp1/Letm1/Cnp/Fpgs/Mcu/Aldh3a2/Ndufs2/Timm23/Slc25a13/Clpx/Ndufa1/Cox7c/Cyb5r3/Akap1/Acadvl/Slc25a35/Atp5g3/Fdxr/Mdh2/Pdk4/Psen1/Timm13/Rsad2/Eral1/Timm9/Slc25a48/Ndufs6/Glud1/Ppif/Micu2/Slc25a30/Ndufb9/Tomm22/Cyc1/Cpox/Mtch1/Ndufv3/Eci1/Cox7a2l/Grpel2/Fech/Timm21/Slc25a45/Pcx/Cpt1a/Acsl5/Ndufb8/Atp5b/Shmt2/Nnt/Sirt3/Hadha…	177
CC	GO:0015934	large ribosomal subunit	61/4257	94/20678	1.48393e-20	1.19456e-18	Rpl13/Mrpl2/Rpl8/Rplp1/Rpl10/Rpl15/Rpl19/Mrpl13/Mrpl39/Mrpl28/Rplp2/Mterf4/Rpl22/Mrpl20/Rpl6/Mrpl51/Mrpl17/Rbm3/Rpl4/Mrpl3/Mrpl15/Mrpl34/Rpl10a/Rpl12/Rpl22l1/Mrpl12/Rpl21/Rpl37/Rpl7/Rpl18a/Rpl37a/Rpl27a/Rpl9/Rpl29/Zfp622/Npm1/Rpl32/Rpl32l/Rpl36/Rpl23a/Rpl5/Rpl18/Rpl11/Rpl3/Rpl35a/Rpl26/Rps12/Rpl34/Rpl17/Rpl7a/Rpl35/Rpl27/Rpl7l1/Rplp0/Rpl23/Rpl31/Rpl13a/Rpl36a/Rpl39/Uba52/Gm5093	61
CC	GO:0042175	nuclear outer membrane-endoplasmic reticulum membrane network	160/4257	434/20678	2.15295e-15	1.54055e-13	Lman2l/Ftcd/Emd/Ssr4/Sdf2/Lmf1/Sri/Fkbp11/Insig2/Calr/Bax/G6pc2/Tmem147/Elovl1/Cav1/Emc10/Ubqln4/Derl3/Aldh3a2/Faf1/Pigyl/Cyb5r3/Derl2/Ctdnep1/Slc35b4/Syne4/Psen1/Hsp90b1/Rhbdf1/Xpo1/Rnf185/Rtn4/Rsad2/Rab10/Slc35b1/Fkbp3/Sptlc2/Tmx1/Vti1b/0610007P14Rik/Elovl2/Nup153/Ssr1/Hmgcr/Spcs1/Tkt/Fitm1/Emc9/Mtdh/Fam134b/Srebf2/Lmf2/Cd4/March5/Pigx/Park2/Slc37a1/Pigf/Tapbp/Tap2/Rtn3/Rce1/Cyp2e1/Rhbdd1/Pigc/…	160
CC	GO:0022627	cytosolic small ribosomal subunit	31/4257	39/20678	5.07562e-15	3.16059e-13	Rps11/Rps9/Rps18/Rps15a/Rps25/Rps5/Rps27a/Rps14/Rps24/Rps26/Rps3a1/Rps20/Rps6/Rps3/Rps4x/Rpsa/Rps29/Rps16/Rps21/Rps19/Rps2/Rps8/Rps23/Rps10/Rps7/Rps17/Rps12/Rps15/Rps28/Rps27/Rps13	31
CC	GO:0015935	small ribosomal subunit	43/4257	66/20678	5.39853e-15	3.16059e-13	Rps11/Rps9/Rps18/Rps15a/Rps25/Rps5/Rack1/Rps27a/Mrps24/Mrps23/Rps14/Rps24/Rps26/Mrps5/Rps3a1/Rps20/Rps6/Mrps15/Mrps11/Rps3/Rps4x/Rpsa/Rps29/Rps16/Mrps26/Rps21/Mrps28/Rps19/Rps2/Rps8/Rps23/Mrps16/Rps10/Mrps21/Npm1/Rps7/Rps17/Rps12/Rps15/Rps28/Dap3/Rps27/Rps13	43
CC	GO:0005789	endoplasmic reticulum membrane	152/4257	418/20678	4.06886e-14	2.18362e-12	Lman2l/Ftcd/Ssr4/Sdf2/Lmf1/Sri/Fkbp11/Insig2/Calr/Bax/G6pc2/Tmem147/Elovl1/Cav1/Emc10/Ubqln4/Derl3/Aldh3a2/Faf1/Pigyl/Cyb5r3/Derl2/Ctdnep1/Slc35b4/Hsp90b1/Rhbdf1/Rnf185/Rtn4/Rsad2/Rab10/Slc35b1/Fkbp3/Sptlc2/Tmx1/Vti1b/0610007P14Rik/Elovl2/Ssr1/Hmgcr/Spcs1/Tkt/Fitm1/Emc9/Mtdh/Fam134b/Srebf2/Lmf2/Cd4/March5/Pigx/Park2/Slc37a1/Pigf/Tapbp/Tap2/Rtn3/Rce1/Cyp2e1/Rhbdd1/Pigc/Dpm2/Tor1a/Emc4/Pex16/Pdia3/…	152
CC	GO:0005777	peroxisome	67/4257	137/20678	1.25837e-13	5.78848e-12	Pxmp4/Fndc5/Crot/Mvd/Cav1/Acot8/Pex12/Acsl1/Pex7/Pex13/Acsl6/Acot3/Eci2/Hmgcr/Hacl1/Tkt/Akap11/Ephx2/Dhrs4/Slc25a17/Mpv17l/Ehhadh/Xdh/Isoc1/Gbf1/Paox/Urah/Idh1/Mff/Pecr/Agxt/Phyh/Crat/Pex16/Slc27a2/Pmvk/Uox/Hsdl2/Hmgcl/Prdx1/Acox3/Pxmp2/Idh2/Pex11a/Acsl4/Abcd1/Nudt7/Acsl3/Acaa1a/Pnpla8/Decr2/Baat/Mvk/Acot4/Ech1/Fabp1/Ide/Idi1/Serhl/Fdps/Acnat2/Impdh2/Ddo/Pex11g/Acnat1/Mlycd/Acad11	67
CC	GO:0042579	microbody	67/4257	137/20678	1.25837e-13	5.78848e-12	Pxmp4/Fndc5/Crot/Mvd/Cav1/Acot8/Pex12/Acsl1/Pex7/Pex13/Acsl6/Acot3/Eci2/Hmgcr/Hacl1/Tkt/Akap11/Ephx2/Dhrs4/Slc25a17/Mpv17l/Ehhadh/Xdh/Isoc1/Gbf1/Paox/Urah/Idh1/Mff/Pecr/Agxt/Phyh/Crat/Pex16/Slc27a2/Pmvk/Uox/Hsdl2/Hmgcl/Prdx1/Acox3/Pxmp2/Idh2/Pex11a/Acsl4/Abcd1/Nudt7/Acsl3/Acaa1a/Pnpla8/Decr2/Baat/Mvk/Acot4/Ech1/Fabp1/Ide/Idi1/Serhl/Fdps/Acnat2/Impdh2/Ddo/Pex11g/Acnat1/Mlycd/Acad11	67
CC	GO:0005925	focal adhesion	129/4257	350/20678	1.14475e-12	4.90916e-11	Cav2/Itga3/Grk5/Rps11/Calr/Rpl8/Cnn2/Hspb1/Fblim1/Rps9/Cyba/Cav1/Rhoa/Rps18/Rps5/Chp1/Yes1/Ppp1cb/Actn1/Hspa8/Pacsin2/Rnd3/Rpl19/Pfn1/Anxa6/Aatf/Hsp90b1/Rab21/Actr2/Csrp2/Tns3/Rab10/Srp68/Gdi2/Lcp1/Ywhaz/Myh9/Plec/Lima1/Ehd3/Svil/Rps14/Capn1/Flnb/Rplp2/Itgb1/Epb41l5/Mpzl1/Dcaf6/Rsu1/Itga4/Itgav/Pdia3/Snap23/Anxa5/Pip5k1a/Tln1/Cap1/Rpl22/Scarb2/Actb/Rpl6/Limk1/Gnb2/Zyx/Nox4/Pak4/Kif22/Rps3/Parva/T…	129
CC	GO:0030055	cell-substrate junction	132/4257	361/20678	1.21967e-12	4.90916e-11	Cav2/Itga3/Grk5/Rps11/Calr/Rpl8/Cnn2/Hspb1/Fblim1/Rps9/Cyba/Cav1/Rhoa/Rps18/Rps5/Chp1/Yes1/Ppp1cb/Actn1/Hspa8/Pacsin2/Rnd3/Rpl19/Pfn1/Anxa6/Aatf/Hsp90b1/Rab21/Actr2/Csrp2/Tns3/Rab10/Srp68/Gdi2/Lcp1/Ywhaz/Myh9/Plec/Lima1/Ehd3/Svil/Lama3/Rps14/Capn1/Flnb/Rplp2/Itgb1/Dst/Epb41l5/Mpzl1/Dcaf6/Rsu1/Itga4/Itgav/Pdia3/Snap23/Anxa5/Pip5k1a/Tln1/Cap1/Rpl22/Scarb2/Actb/Rpl6/Limk1/Gnb2/Zyx/Nox4/Pak4/Kif22/Rp…	132
CC	GO:0005924	cell-substrate adherens junction	129/4257	355/20678	3.63812e-12	1.37821e-10	Cav2/Itga3/Grk5/Rps11/Calr/Rpl8/Cnn2/Hspb1/Fblim1/Rps9/Cyba/Cav1/Rhoa/Rps18/Rps5/Chp1/Yes1/Ppp1cb/Actn1/Hspa8/Pacsin2/Rnd3/Rpl19/Pfn1/Anxa6/Aatf/Hsp90b1/Rab21/Actr2/Csrp2/Tns3/Rab10/Srp68/Gdi2/Lcp1/Ywhaz/Myh9/Plec/Lima1/Ehd3/Svil/Rps14/Capn1/Flnb/Rplp2/Itgb1/Epb41l5/Mpzl1/Dcaf6/Rsu1/Itga4/Itgav/Pdia3/Snap23/Anxa5/Pip5k1a/Tln1/Cap1/Rpl22/Scarb2/Actb/Rpl6/Limk1/Gnb2/Zyx/Nox4/Pak4/Kif22/Rps3/Parva/T…	129
CC	GO:0005759	mitochondrial matrix	86/4257	215/20678	5.43712e-11	1.94528e-09	Mrpl2/Timm44/Tfam/Dnaja3/Cs/Fpgs/Clpx/Glrx2/Akap1/Acadvl/Mdh2/Supv3l1/Polrmt/Mrps24/Eral1/1110008L16Rik/Tert/Glud1/Ppif/Mrpl13/Mrpl39/Mrps23/Lrpprc/Mrpl28/Peo1/Atp5b/Shmt2/Sirt3/Hadha/Tyms/Iscu/Lactb2/Acadl/Agxt/Mterf4/Tfb2m/Mrps5/Etfdh/Hmgcs2/Prdx1/Mrps15/Park7/Atad3a/Mrpl20/Acads/Mrpl51/Mrps11/Rps3/Mrpl17/Acsm3/Acat1/Bckdhb/Etfa/Mrpl3/Acsm1/Ccar2/Gadd45gip1/Mrpl15/Mrpl34/Mrps26/Primpol/Pdk2/Mrp…	86
CC	GO:0030176	integral component of endoplasmic reticulum membrane	55/4257	115/20678	5.75581e-11	1.95092e-09	Insig2/Calr/G6pc2/Elovl1/Emc10/Derl3/Derl2/Slc35b4/Rtn4/Slc35b1/Elovl2/Spcs1/Fitm1/Emc9/Fam134b/Srebf2/Slc37a1/Tapbp/Tap2/Rce1/Rhbdd1/Dpm2/Emc4/Pdia3/Slc27a2/Rrbp1/Abcb9/Ankle2/Emc3/Slc27a5/Dgat2/Stim1/Saraf/Tecr/Emc8/Hacd3/G6pc3/Scd1/Tap1/Tmem33/Elovl3/Pigk/March6/Wfs1/Lrit1/Elovl6/Insig1/Emc6/Fitm2/Ubxn8/Emc7/Dhcr7/Ext1/Hacd1/Bscl2	55
CC	GO:0031227	intrinsic component of endoplasmic reticulum membrane	56/4257	120/20678	1.28539e-10	4.13896e-09	Insig2/Calr/G6pc2/Elovl1/Emc10/Derl3/Derl2/Slc35b4/Rtn4/Slc35b1/Elovl2/Spcs1/Fitm1/Emc9/Fam134b/Srebf2/Slc37a1/Tapbp/Tap2/Rce1/Cyp2e1/Rhbdd1/Dpm2/Emc4/Pdia3/Slc27a2/Rrbp1/Abcb9/Ankle2/Emc3/Slc27a5/Dgat2/Stim1/Saraf/Tecr/Emc8/Hacd3/G6pc3/Scd1/Tap1/Tmem33/Elovl3/Pigk/March6/Wfs1/Lrit1/Elovl6/Insig1/Emc6/Fitm2/Ubxn8/Emc7/Dhcr7/Ext1/Hacd1/Bscl2	56
CC	GO:0044431	Golgi apparatus part	140/4257	418/20678	3.56851e-10	1.09434e-08	Lman2l/Ftcd/Ocrl/Tmem79/Man1a/Rab11a/Ap1s1/Smpd4/Atp7b/Cav1/Ap1b1/Hyal2/Chp1/Tvp23b/Gorasp2/Vps53/Slc2a4/Cog1/Slc35b4/Ap4m1/Rab32/Gopc/Srgn/Rab21/Lgr5/Rhbdf1/Rab10/Slc35b1/Stx8/Scfd1/Fut8/Vrk1/Kif13a/Trim23/Itm2b/St3gal6/Ece2/Park2/Dpy30/Tapbp/Vps52/Ndfip1/Ap3s1/Rab27b/Atp9b/Osbp/Scyl1/Rfng/Gbf1/Cyp2e1/Unc50/Stk16/Pam/Copa/Rab14/Atp9a/Arfgap1/Postn/Lrba/Wls/Rgp1/Clta/St3gal3/Tmem59/Azin2/Sdf4/Chi…	140
CC	GO:0098798	mitochondrial protein complex	62/4257	144/20678	8.16612e-10	2.39045e-08	Cox5a/Atp5f1/Spg7/Tomm40/Atp5d/Bax/Tomm40l/Mcu/Ndufs2/Timm23/Clpx/Ndufa1/Atp5g3/Timm9/Ndufs6/Ppif/Micu2/Ndufb9/Tomm22/Ndufv3/Cox7a2l/Grpel2/Timm21/Ndufb8/Atp5b/Hadha/Atp5c1/Ndufa10/Ndufa8/Timm10/Etfdh/Park7/Ndufa4/Chchd6/Ndufb11/Timm17b/Cox4i1/Bckdhb/Etfa/Cox8a/Ndufv1/Uqcrfs1/Atp5l/Pdk2/Ndufa4l2/Cox6a1/Ndufa7/Immp1l/2410015M20Rik/Atp5k/Suclg1/Chchd3/Hadhb/Uqcr10/Ndufs8/Uqcrh/ND1/COX1/ND4L/Ndufb6/…	62
CC	GO:0000323	lytic vacuole	144/4257	439/20678	1.00866e-09	2.70656e-08	Gm2a/Dnajc5/Tmem79/Tcirg1/Mmd/Psap/Stxbp2/Chmp2b/Man2b1/Atp6v1b2/Tmbim1/Hyal2/Atraid/Hspa8/Sqstm1/Lamp2/Ada/Anxa6/Abca5/Psen1/Srgn/Slc29a3/Slc36a1/Arsg/Ankfy1/Stx8/Vti1b/Lgmn/Npc2/Gpld1/Ctsl/Hexb/Trim23/Cln5/Atp6v1c1/Arsa/Dirc2/Hrg/Rab12/Lnpep/Hsp90ab1/Napg/Lipa/Capn1/Pi4k2a/Got1/Hexa/Ifitm3/Rptor/Mfsd8/Cxcr2/Stk11ip/Tmem63a/Rab14/Abca2/Lrp2/Snap23/Vps16/Snx16/Map1lc3a/Dram2/Enpep/Cd1d1/Lrba/Dnas…	144
CC	GO:0005764	lysosome	144/4257	439/20678	1.00866e-09	2.70656e-08	Gm2a/Dnajc5/Tmem79/Tcirg1/Mmd/Psap/Stxbp2/Chmp2b/Man2b1/Atp6v1b2/Tmbim1/Hyal2/Atraid/Hspa8/Sqstm1/Lamp2/Ada/Anxa6/Abca5/Psen1/Srgn/Slc29a3/Slc36a1/Arsg/Ankfy1/Stx8/Vti1b/Lgmn/Npc2/Gpld1/Ctsl/Hexb/Trim23/Cln5/Atp6v1c1/Arsa/Dirc2/Hrg/Rab12/Lnpep/Hsp90ab1/Napg/Lipa/Capn1/Pi4k2a/Got1/Hexa/Ifitm3/Rptor/Mfsd8/Cxcr2/Stk11ip/Tmem63a/Rab14/Abca2/Lrp2/Snap23/Vps16/Snx16/Map1lc3a/Dram2/Enpep/Cd1d1/Lrba/Dnas…	144
CC	GO:0005774	vacuolar membrane	113/4257	323/20678	1.05942e-09	2.72907e-08	Dnajc5/Tmem79/Tcirg1/Rab23/Chmp2b/Ndrg1/Snx6/Snf8/Atp6v1b2/Tmbim1/Vac14/Atraid/Hspa8/Lamp2/Pacsin2/Rab11fip4/Anxa6/Atp6v0a1/Psen1/Slc29a3/Rab21/Slc36a1/Ankfy1/Stx8/Vti1b/Gpld1/Kif13a/Trim23/Cln5/Atp6v1c1/Hrg/Rab12/Lnpep/Hsp90ab1/Ehd3/Rab27b/Napg/Ehd1/Pi4k2a/Rptor/Mfsd8/Pikfyve/Stk11ip/Pigr/Tmem63a/Mrc1/Rab14/Abca2/Lrp2/Vps16/Snx5/Snx16/Map1lc3a/Enpep/Atp6v0d2/Plekhm2/Mtor/Clcn6/Slc35f6/Abcb9/Scar…	113
CC	GO:0044437	vacuolar part	117/4257	339/20678	1.36122e-09	3.37163e-08	Dnajc5/Tmem79/Tcirg1/Rab23/Chmp2b/Ndrg1/Snx6/Snf8/Atp6v1b2/Tmbim1/Vac14/Atraid/Hspa8/Lamp2/Pacsin2/Vps53/Rab11fip4/Anxa6/Atp6v0a1/Psen1/Vps26a/Slc29a3/Rab21/Slc36a1/Ankfy1/Stx8/Vti1b/Gpld1/Kif13a/Trim23/Cln5/Atp6v1c1/Hrg/Rab12/Lnpep/Hsp90ab1/Ehd3/Vps52/Rab27b/Napg/Ehd1/Pi4k2a/Rptor/Mfsd8/Pikfyve/Stk11ip/Pigr/Tmem63a/Mrc1/Rab14/Abca2/Lrp2/Vps16/Snx5/Snx16/Map1lc3a/Enpep/Atp6v0d2/Plekhm2/Mtor/Clcn6…	117
CC	GO:0044455	mitochondrial membrane part	68/4257	170/20678	5.40332e-09	1.28879e-07	Cox5a/Atp5f1/Spg7/Tomm40/Atp5d/Tomm40l/Mcu/Ndufs2/Timm23/Ndufa1/Rhot1/Akap1/Atp5g3/Timm9/Ndufs6/Micu2/Ndufb9/Tomm22/Synj2/Ndufv3/Cox7a2l/Grpel2/Timm21/Cpt1a/Fundc1/Ndufb8/Atp5b/Atp5c1/Tmem70/Ndufa10/Ndufa8/Etfdh/Park7/Ndufa4/Chchd6/Ndufb11/Timm17b/Cox7b/Cox4i1/Slc8b1/Cox18/Cox8a/Ndufv1/Uqcrfs1/Atp5l/Ndufa4l2/Cox6a1/Ndufa7/Immp1l/Tmem11/Bdnf/2410015M20Rik/Atp5k/Cox6b2/Chchd3/Bak1/Uqcr10/Ndufs8/Ppo…	68
CC	GO:0005635	nuclear envelope	115/4257	355/20678	1.00882e-07	2.32029e-06	Cav2/Slc22a18/S100a6/Gmcl1/Emd/Grk5/Kpna6/Bax/Fancl/Aqp1/Slc2a9/Nsmf/Cdk4/Faf1/Tnpo3/Atraid/Cacybp/Cers2/Hsd11b1/Ctdnep1/Syne4/Psen1/Xpo1/Rtn4/Rrm2/Klhdc2/Trim27/Nup153/Rasa1/Kpna3/Bnip3l/Ednrb/Dhrs4/Rangap1/App/Mrps23/Rps6ka2/Spast/Bnip1/Gsto1/Shisa5/Rb1cc1/Stau2/Unc50/Ahctf1/Parp1/Tor1b/Tor1a/P2rx3/E2f5/Bche/Lmna/Ybx1/Tmem57/Mrps15/Ran/Brap/Mad1l1/Osbpl3/Cbx3/Mad2l1/Anxa4/Tmem43/Pik3c2g/Nucb2/R…	115
CC	GO:0005913	cell-cell adherens junction	107/4257	325/20678	1.11536e-07	2.4763e-06	Trim25/Snd1/Emd/Pkn2/Cnn2/Chmp2b/Ndrg1/Eif4g2/Clint1/Kif5b/Rpl15/Actn1/Hspa8/Pacsin2/Pfn1/Sptbn1/Rack1/Rtn4/Rab10/Ahsa1/Eif5/Tgm1/Ywhaz/Eif3e/Rangap1/Myh9/Plec/Nectin3/Lima1/Krt18/Hsp90ab1/Dsc2/Lama3/Ehd1/Scyl1/Fasn/Flnb/Rps26/Baiap2/Eps8l2/Dock9/Cct8/Itgb1/Idh1/Stat1/Sept2/Fam129b/Sh3glb2/Nop56/Snx5/Ptpn1/Eif2a/Chmp5/Ubap2/Tln1/Eps15/Lypla2/Prdx1/Park7/Arhgef16/Paics/Ran/Golga3/Rpl6/Zc3hav1/Zyx/…	107
CC	GO:0098800	inner mitochondrial membrane protein complex	47/4257	110/20678	1.15355e-07	2.4763e-06	Cox5a/Atp5f1/Spg7/Atp5d/Mcu/Ndufs2/Timm23/Ndufa1/Atp5g3/Timm9/Ndufs6/Micu2/Ndufb9/Ndufv3/Cox7a2l/Grpel2/Timm21/Ndufb8/Atp5b/Atp5c1/Ndufa10/Ndufa8/Park7/Ndufa4/Chchd6/Ndufb11/Timm17b/Cox4i1/Cox8a/Ndufv1/Uqcrfs1/Atp5l/Ndufa4l2/Cox6a1/Ndufa7/Immp1l/2410015M20Rik/Atp5k/Chchd3/Uqcr10/Ndufs8/Uqcrh/ND1/COX1/ND4L/Ndufb6/Usmg5	47
CC	GO:0031968	organelle outer membrane	62/4257	163/20678	2.17579e-07	4.52003e-06	Hk2/Emd/Tomm40/Bax/Phb2/Ppp1cc/Tomm40l/Cnp/Rhot1/Cyb5r3/Akap1/Acsl1/Syne4/Wasf1/Rab32/Rtn4ip1/Psen1/Aifm2/Acsl6/Rnf185/Rsad2/Bnip3l/Tomm22/Tomm70a/March5/Synj2/Slc25a46/Cpt1a/Bad/Acsl5/Fundc1/Gk/Mff/Bok/Marc1/Miga2/Mtch2/Cisd2/Mtor/Nucb2/Acsl4/Cyb5b/Nlrx1/Acsl3/Vat1/Spg20/Aifm1/Sh3glb1/Cisd1/Pi4kb/Kmo/Tspo/Agtr1a/Gja1/Retsat/Bak1/Dhcr7/Hadhb/Mtx1/Bnip3/Tomm20/Bcl2a1a	62
CC	GO:0005765	lysosomal membrane	65/4257	174/20678	2.43309e-07	4.74821e-06	Dnajc5/Tmem79/Tcirg1/Atp6v1b2/Tmbim1/Atraid/Hspa8/Lamp2/Anxa6/Psen1/Slc29a3/Slc36a1/Ankfy1/Stx8/Vti1b/Gpld1/Trim23/Cln5/Atp6v1c1/Hrg/Lnpep/Hsp90ab1/Napg/Pi4k2a/Rptor/Mfsd8/Stk11ip/Tmem63a/Rab14/Abca2/Lrp2/Vps16/Enpep/Atp6v0d2/Mtor/Clcn6/Slc35f6/Abcb9/Scarb2/Vps33a/Tmem106b/Gnb2/Arl8b/Atp11a/Vps35/Acpp/Tpcn1/Nsf/Tmem55b/Clcn7/Enpp1/Scarb1/Daglb/Spns2/Vps41/Wdr41/Rnf152/Tpcn2/Vamp8/Sphk2/Ece1/Gnai1…	65
CC	GO:0098852	lytic vacuole membrane	65/4257	174/20678	2.43309e-07	4.74821e-06	Dnajc5/Tmem79/Tcirg1/Atp6v1b2/Tmbim1/Atraid/Hspa8/Lamp2/Anxa6/Psen1/Slc29a3/Slc36a1/Ankfy1/Stx8/Vti1b/Gpld1/Trim23/Cln5/Atp6v1c1/Hrg/Lnpep/Hsp90ab1/Napg/Pi4k2a/Rptor/Mfsd8/Stk11ip/Tmem63a/Rab14/Abca2/Lrp2/Vps16/Enpep/Atp6v0d2/Mtor/Clcn6/Slc35f6/Abcb9/Scarb2/Vps33a/Tmem106b/Gnb2/Arl8b/Atp11a/Vps35/Acpp/Tpcn1/Nsf/Tmem55b/Clcn7/Enpp1/Scarb1/Daglb/Spns2/Vps41/Wdr41/Rnf152/Tpcn2/Vamp8/Sphk2/Ece1/Gnai1…	65
CC	GO:0005811	lipid particle	31/4257	63/20678	3.86298e-07	7.31694e-06	Cav2/Plin4/Lipe/Cav1/Plin5/Stard13/Akap1/Aifm2/Rsad2/Lpcat1/Spast/Prpf19/Ehd1/Atg2a/Vcp/Plin2/Hsd17b11/Cidec/Dgat2/Acsl4/Nsdhl/Acsl3/Lss/Hsd17b13/Spg20/Abhd4/Pnpla3/Hilpda/Rap1b/Ces1d/Gapdh	31
CC	GO:0019867	outer membrane	62/4257	167/20678	5.85282e-07	1.07692e-05	Hk2/Emd/Tomm40/Bax/Phb2/Ppp1cc/Tomm40l/Cnp/Rhot1/Cyb5r3/Akap1/Acsl1/Syne4/Wasf1/Rab32/Rtn4ip1/Psen1/Aifm2/Acsl6/Rnf185/Rsad2/Bnip3l/Tomm22/Tomm70a/March5/Synj2/Slc25a46/Cpt1a/Bad/Acsl5/Fundc1/Gk/Mff/Bok/Marc1/Miga2/Mtch2/Cisd2/Mtor/Nucb2/Acsl4/Cyb5b/Nlrx1/Acsl3/Vat1/Spg20/Aifm1/Sh3glb1/Cisd1/Pi4kb/Kmo/Tspo/Agtr1a/Gja1/Retsat/Bak1/Dhcr7/Hadhb/Mtx1/Bnip3/Tomm20/Bcl2a1a	62
CC	GO:0031965	nuclear membrane	70/4257	200/20678	1.45848e-06	2.60905e-05	Cav2/Emd/Grk5/Aqp1/Nsmf/Cdk4/Tnpo3/Cers2/Hsd11b1/Ctdnep1/Syne4/Psen1/Xpo1/Klhdc2/Trim27/Nup153/Rasa1/Ednrb/Dhrs4/Rangap1/Mrps23/Rps6ka2/Spast/Gsto1/Rb1cc1/Stau2/Unc50/Ahctf1/P2rx3/Lmna/Ybx1/Tmem57/Mrps15/Brap/Osbpl3/Anxa4/Tmem43/Nucb2/Nup93/Myo6/Hacd3/Dgkh/Scai/Prickle1/Aaas/Tmem97/Gch1/Phf20/Txlng/Nos1ap/Nup205/Rap1gap2/Nup133/Tspo/Dpy19l3/Phlpp1/Adra1a/Gchfr/Lemd3/Adra1b/Nup107/Tmem120b/Cep70/R…	70
CC	GO:0070469	respiratory chain	36/4257	82/20678	1.5555e-06	2.70741e-05	Cox5a/Ndufs2/Ndufa1/Ndufs6/Ndufb9/Cyc1/Ndufv3/Cox7a2l/Ndufb8/Ndufa10/Ndufa8/Park7/Ndufa4/Ndufb11/Cox7b/Cox4i1/Cox8a/Ndufv1/Uqcrfs1/Ndufa4l2/Cox6a1/Ndufa7/Uqcr10/Ndufs8/Uqcrh/ND1/ND2/COX1/COX2/ND4/ND5/ND6/CYTB/ND4L/Ndufb6/Cox7a1	36
CC	GO:0005741	mitochondrial outer membrane	55/4257	149/20678	3.031e-06	5.13675e-05	Hk2/Tomm40/Bax/Phb2/Ppp1cc/Tomm40l/Cnp/Rhot1/Cyb5r3/Akap1/Acsl1/Wasf1/Rab32/Rtn4ip1/Aifm2/Acsl6/Rnf185/Rsad2/Bnip3l/Tomm22/Tomm70a/March5/Synj2/Slc25a46/Cpt1a/Bad/Acsl5/Fundc1/Gk/Mff/Bok/Marc1/Miga2/Mtch2/Cisd2/Mtor/Acsl4/Cyb5b/Nlrx1/Acsl3/Vat1/Spg20/Aifm1/Sh3glb1/Cisd1/Pi4kb/Kmo/Tspo/Gja1/Bak1/Hadhb/Mtx1/Bnip3/Tomm20/Bcl2a1a	55
CC	GO:0031970	organelle envelope lumen	34/4257	78/20678	3.65583e-06	6.03681e-05	Thop1/Timm23/Cacybp/Pnpt1/Timm9/Glrx/Nln/Micu2/Cpox/App/Shmt2/Ndufa8/Timm10/Gatm/Pdia3/Bche/Ak2/Park7/Triap1/Arl2bp/Chchd4/Aifm1/Chchd5/Txnip/Coa4/Timm8a1/Sorl1/Chchd10/Ptges/Sirt5/Hsd3b3/Hsd3b2/Htra2/Chchd2	34
CC	GO:0098791	Golgi subcompartment	73/4257	216/20678	3.82149e-06	6.1526e-05	Ocrl/Tmem79/Rab11a/Ap1s1/Smpd4/Atp7b/Ap1b1/Gorasp2/Vps53/Ap4m1/Rab32/Rab21/Lgr5/Rab10/Stx8/Fut8/Vrk1/Kif13a/Ece2/Dpy30/Ap3s1/Rab27b/Atp9b/Gbf1/Pam/Rab14/Atp9a/Postn/Lrba/Wls/Tmem59/Azin2/Rab30/Nucb2/Stx4a/Flna/Smpd3/Bace1/Trappc4/Nck1/Acpp/Atp2c1/Arap1/Ap4b1/Dnm2/Nsf/Becn1/Plekhj1/Tgfbi/Ggta1/Gcc2/Cnst/Coro7/Fnbp1l/Scamp2/Scamp5/B4galnt3/Wipi1/Zfyve1/Cltb/Sorl1/B3galt6/Adam10/B4galnt4/Tgoln1/Tgol…	73
CC	GO:0034364	high-density lipoprotein particle	15/4257	23/20678	4.42482e-06	6.9502e-05	Apoh/Pon1/Apoc2/Abca1/Gpld1/Gpihbp1/Apom/Apoa5/Lipc/Lcat/Saa4/Saa3/Apof/Saa2/Saa1	15
CC	GO:0044438	microbody part	28/4257	61/20678	7.80309e-06	0.000116865	Pxmp4/Mvd/Cav1/Acot8/Pex12/Acsl1/Pex7/Pex13/Hmgcr/Dhrs4/Slc25a17/Paox/Pecr/Agxt/Pex16/Slc27a2/Prdx1/Acox3/Pxmp2/Pex11a/Abcd1/Pnpla8/Decr2/Fabp1/Ide/Impdh2/Pex11g/Mlycd	28
CC	GO:0044439	peroxisomal part	28/4257	61/20678	7.80309e-06	0.000116865	Pxmp4/Mvd/Cav1/Acot8/Pex12/Acsl1/Pex7/Pex13/Hmgcr/Dhrs4/Slc25a17/Paox/Pecr/Agxt/Pex16/Slc27a2/Prdx1/Acox3/Pxmp2/Pex11a/Abcd1/Pnpla8/Decr2/Fabp1/Ide/Impdh2/Pex11g/Mlycd	28
CC	GO:0005758	mitochondrial intermembrane space	29/4257	65/20678	1.07484e-05	0.000157318	Thop1/Timm23/Pnpt1/Timm9/Glrx/Nln/Micu2/Cpox/Shmt2/Ndufa8/Timm10/Gatm/Pdia3/Ak2/Park7/Triap1/Arl2bp/Chchd4/Aifm1/Chchd5/Txnip/Coa4/Timm8a1/Chchd10/Sirt5/Hsd3b3/Hsd3b2/Htra2/Chchd2	29
CC	GO:0031984	organelle subcompartment	74/4257	227/20678	1.40043e-05	0.000200418	Ocrl/Tmem79/Rab11a/Ap1s1/Smpd4/Atp7b/Ap1b1/Gorasp2/Vps53/Ap4m1/Rab32/Rab21/Lgr5/Rab10/Stx8/Fut8/Vrk1/Kif13a/Ece2/Dpy30/Ap3s1/Rab27b/Atp9b/Gbf1/Pam/Rab14/Atp9a/Postn/Lrba/Wls/Tmem59/Azin2/Rab30/Nucb2/Stx4a/Stim1/Flna/Smpd3/Bace1/Trappc4/Nck1/Acpp/Atp2c1/Arap1/Ap4b1/Dnm2/Nsf/Becn1/Plekhj1/Tgfbi/Ggta1/Gcc2/Cnst/Coro7/Fnbp1l/Scamp2/Scamp5/B4galnt3/Wipi1/Zfyve1/Cltb/Sorl1/B3galt6/Adam10/B4galnt4/Tgoln…	74
CC	GO:0043209	myelin sheath	69/4257	210/20678	2.01023e-05	0.000281432	Cox5a/Atp5f1/Wdr1/Ndrg1/Atp6v1b2/Cnp/Pten/Hspa8/Mdh2/Ubb/Rtn4/Rps27a/Gdi2/Hsp90aa1/Srd5a1/Marveld2/Tkt/Sucla2/Cct5/Tuba1b/Ehd3/Napg/Ehd1/Stip1/Gsto1/Atp5b/Atp5c1/Itgb1/Ndufa10/Sept2/Glul/Atp1b1/Pdia3/Car2/Mpdz/Vcp/Prdx1/Fam213b/Actb/Gnb2/Exoc4/Ldhb/Myh14/Stx4a/Plp1/Got2/Pllp/Nsf/Myo1d/Gpi1/Tubb4b/Prkci/Eef1a1/Uqcrfs1/Atp1a3/Cldn5/Cox6a1/Gjc2/Ncmap/Plcb1/Gapdh/Gstm1/Slc25a3/Tubb4a/Eno1/Tcp1/Cd59b/…	69
CC	GO:0005770	late endosome	55/4257	159/20678	2.71228e-05	0.00037164	Rab11a/Chmp2b/Snf8/Atp7b/Hspa8/Lamp2/Anxa6/Derl2/Slc2a4/Abca5/Stx8/Vti1b/Lgmn/Rab27b/Rab14/Vps16/Snx16/Map1lc3a/Ntrk1/Cd1d1/Tmem59/Sdf4/Htt/Slc30a3/Vps33a/Zc3hav1/Lamtor1/Rnf128/Vps35/Bace1/Ldlr/Lipc/Snx14/Acpp/Ankrd27/Tmem55b/Ap5m1/Vps41/Osbpl1a/Pcsk9/Irgm1/Slc38a9/Sorl1/Vamp8/AI314180/Gja1/Chmp3/Rhob/Rab31/Tpt1/Slc31a2/Rap1a/Ttpa/Rab9/Lamtor3	55
CC	GO:0005788	endoplasmic reticulum lumen	24/4257	52/20678	3.06341e-05	0.000411007	Calr/Hsp90b1/Erlec1/Pdia6/Cd4/Mzb1/Gbf1/Rdh5/Tor1b/Tor1a/Slc27a2/Bche/Lrpap1/Tmem43/Cln6/Colgalt1/Txndc5/Os9/Ces1d/Tor3a/Rdh16/Lyz2/Rnaset2b/Rnaset2a	24
CC	GO:0005746	mitochondrial respiratory chain	29/4257	69/20678	4.25899e-05	0.000559753	Cox5a/Ndufs2/Ndufa1/Ndufs6/Ndufb9/Ndufv3/Cox7a2l/Ndufb8/Ndufa10/Ndufa8/Park7/Ndufa4/Ndufb11/Cox7b/Cox4i1/Cox8a/Ndufv1/Uqcrfs1/Ndufa4l2/Cox6a1/Ndufa7/Uqcr10/Ndufs8/Uqcrh/ND1/COX1/ND4L/Ndufb6/Cox7a1	29
CC	GO:0034358	plasma lipoprotein particle	18/4257	35/20678	5.05095e-05	0.000637806	Apoh/Pon1/Apoc2/Abca1/Lpl/Gpld1/Gpihbp1/Apom/Apoa5/Ldlr/Lipc/Lcat/Saa4/Saa3/Apof/Sorl1/Saa2/Saa1	18
CC	GO:1990777	lipoprotein particle	18/4257	35/20678	5.05095e-05	0.000637806	Apoh/Pon1/Apoc2/Abca1/Lpl/Gpld1/Gpihbp1/Apom/Apoa5/Ldlr/Lipc/Lcat/Saa4/Saa3/Apof/Sorl1/Saa2/Saa1	18
CC	GO:0031301	integral component of organelle membrane	50/4257	144/20678	5.49824e-05	0.000680936	Spg7/Tomm40/Mcu/Timm23/Tvp23b/Rhot1/Pex12/Slc35b4/Syne4/Pex13/Sypl/Slc35b1/Itm2b/Slc25a17/Tomm22/St3gal6/Ndfip1/Cpt1a/Fundc1/Rfng/Tmem70/Unc50/P2rx3/Pex16/Slc27a2/Etfdh/St3gal3/Cux1/Chchd6/Tmem43/Pex11a/Timm17b/Abcd1/St3gal4/Slc8b1/Cox18/Qsox2/Tmem11/Emc6/Rnf152/Ubiad1/Lemd3/2410015M20Rik/Chchd3/Bak1/Ppox/Rdh16/Pex11g/Bnip3/Tomm20	50
CC	GO:0005802	trans-Golgi network	56/4257	167/20678	6.20497e-05	0.000753962	Ocrl/Tmem79/Rab11a/Ap1s1/Smpd4/Atp7b/Ap1b1/Vps53/Ap4m1/Rab32/Rab21/Lgr5/Rab10/Stx8/Kif13a/Ece2/Dpy30/Ap3s1/Atp9b/Gbf1/Pam/Rab14/Atp9a/Postn/Lrba/Wls/Azin2/Rab30/Stx4a/Flna/Bace1/Nck1/Atp2c1/Arap1/Ap4b1/Dnm2/Becn1/Plekhj1/Tgfbi/Gcc2/Cnst/Coro7/Fnbp1l/Scamp2/Scamp5/Wipi1/Cltb/Sorl1/Adam10/Tgoln1/Tgoln2/Rab31/Caln1/Pclo/Ap3s2/Nck2	56
CC	GO:0032040	small-subunit processome	17/4257	33/20678	7.94059e-05	0.000946988	Emg1/Utp20/Pdcd11/Imp4/Nop56/Nol6/Imp3/Noc4l/Utp6/Tbl3/Rrp9/Utp18/Rps7/Nhp2l1/Utp14a/Utp3/Utp14b	17
CC	GO:0098803	respiratory chain complex	28/4257	68/20678	8.87052e-05	0.00103866	Cox5a/Ndufs2/Ndufa1/Ndufs6/Ndufb9/Ndufv3/Ndufb8/Ndufa10/Ndufa8/Park7/Ndufa4/Ndufb11/Cox7b/Cox4i1/Cox8a/Ndufv1/Uqcrfs1/Ndufa4l2/Cox6a1/Ndufa7/Uqcr10/Ndufs8/Uqcrh/ND1/COX1/CYTB/ND4L/Ndufb6	28
CC	GO:1990124	messenger ribonucleoprotein complex	4257-08-01	10/20678	9.65404e-05	0.00111021	Hspa8/Cpeb4/Cpeb1/Stau2/Ybx1/Lsm1/Cpeb3/Hnrnpa3	8
CC	GO:0000932	cytoplasmic mRNA processing body	26/4257	62/20678	0.00010909	0.00123253	Psmc3/Mov10/Btbd2/Pan2/Lsm2/Sqstm1/Psma6/Noct/Dcp2/Btbd1/Caprin1/Pnrc2/Lsm6/Dcps/Psma4/Lsm1/Zc3h12d/Ythdf2/Dcp1b/Ago1/Zc3h12a/Dis3l2/Trim12c/Trim5/Lsm14a/Polr2g	26
CC	GO:0005844	polysome	20/4257	43/20678	0.000121341	0.00134731	Calr/Eif2ak4/Rps25/Psma6/Fxr1/Rps6/Rps3/Fus/Vbp1/Rps4x/Eef2/Naa30/Ago1/Gcn1l1/Rpl7/Rpl29/Eif4b/Naa38/Rpl17/Rpl7a	20
CC	GO:0032994	protein-lipid complex	18/4257	37/20678	0.000128502	0.00140263	Apoh/Pon1/Apoc2/Abca1/Lpl/Gpld1/Gpihbp1/Apom/Apoa5/Ldlr/Lipc/Lcat/Saa4/Saa3/Apof/Sorl1/Saa2/Saa1	18
CC	GO:0031300	intrinsic component of organelle membrane	50/4257	149/20678	0.000146215	0.00156937	Spg7/Tomm40/Mcu/Timm23/Tvp23b/Rhot1/Pex12/Slc35b4/Syne4/Pex13/Sypl/Slc35b1/Itm2b/Slc25a17/Tomm22/St3gal6/Ndfip1/Cpt1a/Fundc1/Rfng/Tmem70/Unc50/P2rx3/Pex16/Slc27a2/Etfdh/St3gal3/Cux1/Chchd6/Tmem43/Pex11a/Timm17b/Abcd1/St3gal4/Slc8b1/Cox18/Qsox2/Tmem11/Emc6/Rnf152/Ubiad1/Lemd3/2410015M20Rik/Chchd3/Bak1/Ppox/Rdh16/Pex11g/Bnip3/Tomm20	50
CC	GO:0001725	stress fiber	25/4257	60/20678	0.000166206	0.0017264	Cnn2/Fblim1/Tek/Cyba/Actn1/Myh11/Myh10/Lcp1/Myh9/Mylk/Lima1/Myl12a/Ablim1/Flnb/Zyx/Nox4/Sipa1l3/Myh14/Ablim3/Myl12b/Fermt2/Pgm5/Sept11/Palld/Myl9	25
CC	GO:0097517	contractile actin filament bundle	25/4257	60/20678	0.000166206	0.0017264	Cnn2/Fblim1/Tek/Cyba/Actn1/Myh11/Myh10/Lcp1/Myh9/Mylk/Lima1/Myl12a/Ablim1/Flnb/Zyx/Nox4/Sipa1l3/Myh14/Ablim3/Myl12b/Fermt2/Pgm5/Sept11/Palld/Myl9	25
CC	GO:0044440	endosomal part	56/4257	173/20678	0.000180111	0.00182187	Rab23/Chmp2b/Ndrg1/Snx6/Snf8/Tmbim1/Vac14/Lamp2/Pacsin2/Vps53/Rab11fip4/Anxa6/Vps26a/Rab21/Ankfy1/Stx8/Vti1b/Kif13a/Rab12/Ehd3/Vps52/Rab27b/Ehd1/Pi4k2a/Pikfyve/Pigr/Mrc1/Vps16/Snx5/Snx16/Plekhm2/Vps33a/Lamtor1/Vps35/Snx19/Ldlr/Tpcn1/Ankrd27/Tmem55b/Tmem184a/Snx10/Fig4/Scamp2/Scamp5/Appl1/Rcc2/Vps41/Wipi1/Slc38a9/Tpcn2/Snx21/Vamp8/Chmp3/Rhob/Rab11b/Lamtor3	56
CC	GO:0032432	actin filament bundle	27/4257	67/20678	0.000181224	0.00182187	Cnn2/Fblim1/Tek/Cyba/Actn1/Pls3/Myh11/Myh10/Lcp1/Myh9/Mylk/Lima1/Myl12a/Ablim1/Flnb/Zyx/Nox4/Sipa1l3/Myh14/Flna/Ablim3/Myl12b/Fermt2/Pgm5/Sept11/Palld/Myl9	27
CC	GO:0099023	tethring complex	24/4257	57/20678	0.000183885	0.00182187	Vps53/Cog1/Nbas/Exoc7/Scfd1/Exoc2/Vps52/Sept2/Vps16/Rint1/Vps33a/Golga3/Exoc4/Cog4/Cog8/Trappc4/Zw10/Trappc8/Exoc3/Dnajc28/Vps41/Stxbp6/Trappc1/Hook2	24
CC	GO:0005769	early endosome	64/4257	206/20678	0.000243715	0.00237806	Ocrl/Rnd2/Snx6/D130043K22Rik/Derl2/Aoc3/Rab32/Vps26a/Rab21/Snx13/Ankfy1/Stx8/Zfyve16/E430025E21Rik/Fam21/Ehd1/Pi4k2a/Rabgef1/Pikfyve/Rabgap1l/Rab14/Sdccag3/Vps16/Snx5/Snx16/Ptpn1/Atp9a/Ntrk1/Cd1d1/Wls/Atp6v0d2/Eps15/Vps33a/Coro1a/Vps35/Snx19/Ldlr/Lipc/Trak1/P2ry2/Neurl1b/Ankrd27/Plekhj1/Tmem184a/Lmtk2/Rcc2/Vps41/Rap1gap/Pcsk9/Samd9l/Sorl1/Snx21/Vamp8/AI314180/Gja1/Chmp3/Rhob/Rab31/Ece1/Flot1/Kdr/…	64
CC	GO:0005801	cis-Golgi network	17/4257	36/20678	0.000309798	0.00286714	Pcnt/Slc35c2/Ctgf/Limk2/Ubxn2a/Scfd1/Angel1/Fam134b/Scyl1/Gbf1/Azin2/Rab30/Golgb1/Bcl9/Pik3r1/Tmed5/B3gat3	17
CC	GO:0070069	cytochrome complex	14/4257	27/20678	0.000311227	0.00286714	Cox5a/Ndufa4/Cox7b/Cox4i1/Cox8a/Uqcrfs1/Ndufa4l2/Cox6a1/Cox10/Uqcr10/Uqcrh/COX1/CYTB/Ugt1a1	14
CC	GO:0005782	peroxisomal matrix	4257-10-01	16/20678	0.000316163	0.00286714	Mvd/Acot8/Pex7/Paox/Agxt/Prdx1/Acox3/Fabp1/Ide/Mlycd	10
CC	GO:0031907	microbody lumen	4257-10-01	16/20678	0.000316163	0.00286714	Mvd/Acot8/Pex7/Paox/Agxt/Prdx1/Acox3/Fabp1/Ide/Mlycd	10
CC	GO:1905368	peptidase complex	31/4257	83/20678	0.000320392	0.00286714	Spg7/Psmc3/Rad23a/Hspb1/Ubqln4/Psmc5/Psma6/Spcs1/Psme1/Slc10a2/Psmb8/Psmd5/Vcp/Psmd9/Psmd8/Psma1/Psmb10/Psma4/Psmf1/Supt3/Psmd7/Wfs1/Usp22/Usp14/AI314180/Zfand2a/Ide/Psma5/Ubxn1/Taf9/Psmb9	31
CC	GO:0042641	actomyosin	27/4257	69/20678	0.00032055	0.00286714	Kat2b/Cnn2/Fblim1/Tek/Cyba/Actn1/Myh11/Myh10/Lcp1/Myh9/Mylk/Lima1/Myl12a/Ablim1/Flnb/Lurap1/Zyx/Nox4/Sipa1l3/Myh14/Ablim3/Myl12b/Fermt2/Pgm5/Sept11/Palld/Myl9	27
CC	GO:0032592	integral component of mitochondrial membrane	21/4257	49/20678	0.000341522	0.00301288	Spg7/Tomm40/Mcu/Timm23/Rhot1/Tomm22/Cpt1a/Fundc1/Tmem70/Etfdh/Chchd6/Timm17b/Slc8b1/Cox18/Tmem11/2410015M20Rik/Chchd3/Bak1/Ppox/Bnip3/Tomm20	21
CC	GO:0000502	proteasome complex	26/4257	66/20678	0.00036285	0.00311567	Psmc3/Rad23a/Hspb1/Ubqln4/Psmc5/Psma6/Psme1/Slc10a2/Psmb8/Psmd5/Vcp/Psmd9/Psmd8/Psma1/Psmb10/Psma4/Psmf1/Psmd7/Wfs1/Usp14/AI314180/Zfand2a/Ide/Psma5/Ubxn1/Psmb9	26
CC	GO:1905369	endopeptidase complex	26/4257	66/20678	0.00036285	0.00311567	Psmc3/Rad23a/Hspb1/Ubqln4/Psmc5/Psma6/Psme1/Slc10a2/Psmb8/Psmd5/Vcp/Psmd9/Psmd8/Psma1/Psmb10/Psma4/Psmf1/Psmd7/Wfs1/Usp14/AI314180/Zfand2a/Ide/Psma5/Ubxn1/Psmb9	26
CC	GO:0010008	endosome membrane	50/4257	155/20678	0.000424291	0.00359531	Rab23/Chmp2b/Ndrg1/Snx6/Snf8/Tmbim1/Vac14/Lamp2/Pacsin2/Rab11fip4/Anxa6/Rab21/Ankfy1/Stx8/Vti1b/Kif13a/Rab12/Ehd3/Rab27b/Ehd1/Pi4k2a/Pikfyve/Pigr/Mrc1/Vps16/Snx5/Snx16/Plekhm2/Lamtor1/Snx19/Ldlr/Tpcn1/Tmem55b/Tmem184a/Snx10/Fig4/Scamp2/Scamp5/Appl1/Rcc2/Vps41/Wipi1/Slc38a9/Tpcn2/Snx21/Vamp8/Chmp3/Rhob/Rab11b/Lamtor3	50
CC	GO:0055037	recycling endosome	38/4257	110/20678	0.000456834	0.00381874	Rab11a/Ndrg1/Snf8/Pacsin2/Vps53/Rab11fip4/Rab10/Stx8/Vti1b/Rab12/Ehd3/Vps52/Ehd1/Aatk/Pigr/Fcgr2b/Rab14/Sdccag3/Vps16/Atp9a/Tbc1d14/Ran/Avl9/Slc9a9/Atp11a/Ldlr/Plekhj1/Fig4/Lmtk2/Scamp2/Scamp5/Dennd6a/Agtr1a/Sorl1/Vamp8/Bloc1s2/Slc31a2/Rab11b	38
CC	GO:0000151	ubiquitin ligase complex	82/4257	283/20678	0.000462519	0.00381874	Gmcl1/Fbxo9/Btbd2/Crbn/Hspa8/Ube2a/Med24/Smurf2/Pcgf2/Anapc16/Cand1/Ube2b/Rnf144a/Dcaf4/Ube2e1/Fbxl3/Rnf19a/Fbxo32/Sharpin/Park2/Ubr2/Pcgf6/Btbd1/Btrc/Arih1/Dcaf6/Bmi1/Rbck1/Cks1b/Fbxw7/Dyrk2/Phc2/Ube4b/Klhl7/Fbxo44/Mad2l2/Anapc4/Brap/Cul1/Med21/Rnf40/Cul4b/Med17/Dcun1d5/Abtb2/Fbxo21/Cacul1/Vhl/Asb16/Fbxl21/Dcaf10/Topors/Dtl/Rnf144b/Fbxo8/Cul7/Stub1/Zer1/Cbx4/Cul9/Os9/Enc1/Kbtbd7/Klhl31/Rnf7/Bre/…	82
CC	GO:0030684	preribosome	27/4257	71/20678	0.000546943	0.00445863	Emg1/Utp20/Aamp/Rplp1/Pdcd11/Rplp2/Imp4/Nop56/Tex10/Nol6/Ebna1bp2/Imp3/Rpsa/Noc4l/Utp6/Tbl3/Rrp9/Zfp622/Utp18/Rrp1b/Nsa2/Rps7/Nhp2l1/Utp14a/Rplp0/Utp3/Utp14b	27
CC	GO:0098573	intrinsic component of mitochondrial membrane	21/4257	51/20678	0.000653152	0.00525787	Spg7/Tomm40/Mcu/Timm23/Rhot1/Tomm22/Cpt1a/Fundc1/Tmem70/Etfdh/Chchd6/Timm17b/Slc8b1/Cox18/Tmem11/2410015M20Rik/Chchd3/Bak1/Ppox/Bnip3/Tomm20	21
CC	GO:0045177	apical part of cell	103/4257	374/20678	0.000714811	0.00568319	Slc22a18/Tcirg1/Stxbp2/Aqp1/Atp4a/Pard6a/Tek/Cyba/Atp7b/Hyal2/Pten/Cacna1d/Hsd11b1/Cd300lg/Erbb3/Anxa6/Slc22a5/Slc9a3r1/Slc46a1/Lgmn/Hsp90aa1/Ctsl/Marveld2/Ocln/Btd/Mtdh/Atp6v1c1/Emp2/Cldn1/Plec/Gpihbp1/Cldnd1/App/Slc10a2/Slc26a6/Hsp90ab1/Slc23a1/Rab27b/Fas/Acy3/Abcc2/Ifitm3/Cdhr5/Podxl/Homer2/Myo5b/Cd55/Atp1b1/Cfap126/Rab14/Lrp2/Pdia3/Car2/Slc2a2/Stxbp3/Dram2/Il6ra/Enpep/Atp6v0d2/Mpdz/Eps15/Cyp4…	103
CC	GO:0005798	Golgi-associated vesicle	26/4257	69/20678	0.000807553	0.00634225	Ap1s1/Slc2a4/Gopc/Scfd1/Itm2b/Rab27b/Scyl1/Stk16/Copa/Rab14/Clta/Chic2/Copg1/Zdhhc13/Vps41/Pi4ka/Ccdc115/Cltb/Aftph/Adam10/Cope/Tgoln1/Tgoln2/Copz1/Sort1/Lyz2	26
CC	GO:0061695	transferase complex, transferring phosphorus-containing groups	68/4257	231/20678	0.000849362	0.00659023	Acvr1b/Ccne1/Gtf2h1/Cdk4/Pole/Cdk9/Vac14/Edf1/Pold2/Twistnb/Psmc5/Recql5/Snw1/Tert/Med4/Cdkn1a/Brd4/Ccny/Ercc3/Taf5/Ints4/Pfkfb1/Prps2/Rb1cc1/Cdc73/Papss1/Cks1b/Ccne2/Pik3r3/Taf12/Cdk14/Mad2l2/Cpsf3l/Ulk1/Ints1/Polr1d/Pole4/Pik3c2g/Phka2/Polr2c/Polr2m/Pik3cb/Myo6/Phka1/Becn1/Phkb/Ints7/Polr2l/Polr3k/Supt3/Polr2j/Pik3cd/Ints8/Pik3r1/Trrap/Taf13/Taf7/Chd6/Trp53/Wdr61/Cks2/Med18/Polr1c/Ccnd1/Tbpl1/P…	68
CC	GO:0000421	autophagosome membrane	4257-09-01	15/20678	0.000975774	0.00748093	Map1lc3a/Ulk1/Gabarapl1/Map1lc3b/Gabarapl2/Sh3glb1/Wipi1/Atg16l2/Tecpr1	9
CC	GO:0009295	nucleoid	19/4257	46/20678	0.00111276	0.00833274	Tfam/Clpx/Acadvl/Supv3l1/Polrmt/1110008L16Rik/Tert/Lrpprc/Peo1/Atp5b/Shmt2/Hadha/Tfb2m/Atad3a/Trmt10c/Ddx28/Tefm/Mterf2/Hadhb	19
CC	GO:0042645	mitochondrial nucleoid	19/4257	46/20678	0.00111276	0.00833274	Tfam/Clpx/Acadvl/Supv3l1/Polrmt/1110008L16Rik/Tert/Lrpprc/Peo1/Atp5b/Shmt2/Hadha/Tfb2m/Atad3a/Trmt10c/Ddx28/Tefm/Mterf2/Hadhb	19
CC	GO:0000139	Golgi membrane	58/4257	194/20678	0.00131085	0.00970331	Lman2l/Ftcd/Tmem79/Man1a/Atp7b/Cav1/Hyal2/Chp1/Tvp23b/Slc35b4/Srgn/Rab21/Lgr5/Rhbdf1/Slc35b1/Fut8/Kif13a/Trim23/St3gal6/Park2/Tapbp/Ndfip1/Osbp/Rfng/Cyp2e1/Unc50/Arfgap1/Rgp1/St3gal3/Hpd/Golga3/Cux1/Copg1/Tnfrsf1a/Zdhhc13/Plekhb1/Pgap2/Gabarapl2/St3gal4/Atp2c1/Slc35a4/Dnm2/Qsox2/Chst7/Scamp2/Scamp5/Rfwd2/B4galnt3/Lman1/Abcb4/Prkce/Whamm/Ubiad1/B4galnt4/Rab31/Chsy3/Caln1/Stk24	58
CC	GO:0015629	actin cytoskeleton	115/4257	435/20678	0.00179915	0.0131665	Kat2b/Stk38l/Dnaja3/Cnn2/Myo9b/Wdr1/Pard6a/Fblim1/Hspb7/Tek/Cyba/Yes1/Actn1/Capza2/Med28/Dstn/Pls3/Crk/Myh11/Utrn/Fyn/Actr2/Cobl/Sptbn1/Smtn/Acaca/Eral1/Myh10/Carmil1/Lcp1/Bin3/Rai14/Myo10/Mtss1/Myh9/Mylk/Lima1/Clic5/Myl12a/Svil/Dctn4/Taf5/Ablim1/Flnb/Baiap2/Stag2/Myo5b/Stk17b/Dst/Sept2/Fam129b/Abl1/Neb/Ttc17/Vps16/Tpm2/Macf1/Cap1/Lurap1/Ptpn12/Mad1l1/Lmod2/Zyx/Gys2/Scnn1a/Nox4/Sipa1l3/Coro1a/Myh…	115
CC	GO:0016324	apical plasma membrane	78/4257	279/20678	0.00189788	0.0137329	Slc22a18/Tcirg1/Stxbp2/Aqp1/Atp4a/Tek/Cyba/Hyal2/Pten/Cacna1d/Cd300lg/Erbb3/Anxa6/Slc22a5/Slc9a3r1/Slc46a1/Hsp90aa1/Marveld2/Ocln/Mtdh/Emp2/Cldn1/Plec/Gpihbp1/Cldnd1/Slc10a2/Slc26a6/Hsp90ab1/Slc23a1/Rab27b/Fas/Acy3/Abcc2/Cdhr5/Podxl/Cd55/Atp1b1/Cfap126/Rab14/Lrp2/Pdia3/Slc2a2/Stxbp3/Dram2/Il6ra/Enpep/Atp6v0d2/Mpdz/Eps15/Cyp4a31/Slc2a5/Shroom3/Abcg2/Anxa4/Atp2b2/Scnn1a/Nox4/Slco2b1/Aqp8/Stx4a/P2ry…	78
CC	GO:0031305	integral component of mitochondrial inner membrane	4257-11-01	22/20678	0.00202453	0.0144866	Spg7/Mcu/Timm23/Etfdh/Chchd6/Timm17b/Cox18/Tmem11/2410015M20Rik/Chchd3/Ppox	11
CC	GO:0005813	centrosome	124/4257	476/20678	0.00216207	0.0153008	Pcnt/Ift46/Spag5/Ccne1/Ndrg2/Pkn2/Rab11a/Ndrg1/Cct4/Mplkip/Nfe2l2/H2afy/Actr8/Ift27/Cdk5rap3/Aatf/Rad51d/Psen1/Slc1a4/Slc9a3r1/Exoc7/Kif13a/Zfp369/Xrcc4/Haus4/Cct5/Rnf19a/Tbc1d31/Maf1/Cep97/Mzt2/Gsk3b/Krt18/Cep89/Dctn4/Keg1/Pcgf5/Tubgcp2/Cpeb1/Cct8/Ppp1r42/Ssna1/Harbi1/Mkks/Dclre1b/Jtb/Odf2l/Aldob/Pde4b/Htt/Rilpl1/Rilpl2/Cdkl2/Ran/Mtus2/Caprin2/Psma1/Fam175b/Pqbp1/Hdac6/Cetn2/Haus7/Nek3/Arl2bp/Ka…	124
CC	GO:1990204	oxidoreductase complex	31/4257	92/20678	0.00229069	0.0160348	Cyba/Ndufs2/Ndufa1/Noxo1/Rrm2/Ndufs6/Ndufb9/Ndufv3/Gldc/Ndufb8/Ndufa10/Gpd2/Ndufa8/Park7/Nox4/Rrm1/Ndufb11/Bckdhb/Gcsh/Ndufv1/Uqcrfs1/Fam206a/Pdk2/Ndufa7/Uqcr10/Ndufs8/Uqcrh/ND1/CYTB/ND4L/Ndufb6	31
CC	GO:0072546	ER membrane protein complex	4257-07-01	11/20678	0.00234128	0.0162128	Emc10/Emc9/Emc4/Emc3/Emc8/Emc6/Emc7	7
CC	GO:0035770	ribonucleoprotein granule	43/4257	139/20678	0.00256323	0.0173833	Psmc3/Mov10/Btbd2/Pan2/Lsm2/Khsrp/Sqstm1/Psma6/Noct/Dcp2/Btbd1/Stau2/Caprin1/Fxr1/Rps6/Ybx1/Pnrc2/Htt/Clock/Actb/Rpl6/Pqbp1/Rbpms/Lsm6/Dcps/Psma4/Atxn2l/Lsm1/Zc3h12d/Ythdf2/Dcp1b/Ago1/Tdrkh/Zc3h12a/Ddx28/Dis3l2/Arntl/Trim12c/Hnrnpa3/Trim5/Lsm14a/Rplp0/Polr2g	43
CC	GO:0008287	protein serine/threonine phosphatase complex	17/4257	42/20678	0.0025913	0.0173833	Ppp2r1a/Ppp2cb/Ppp1cb/Tox4/Ppp2r5c/Ctdnep1/Wdr82/Shoc2/Ppp3ca/Ppp4c/Nck1/Ppp3r1/Ptpa/Ppp1ca/Ppp2r2d/Ppp1r2/Ppp4r2	17
CC	GO:1903293	phosphatase complex	17/4257	42/20678	0.0025913	0.0173833	Ppp2r1a/Ppp2cb/Ppp1cb/Tox4/Ppp2r5c/Ctdnep1/Wdr82/Shoc2/Ppp3ca/Ppp4c/Nck1/Ppp3r1/Ptpa/Ppp1ca/Ppp2r2d/Ppp1r2/Ppp4r2	17
CC	GO:0005793	endoplasmic reticulum-Golgi intermediate compartment	21/4257	56/20678	0.00265312	0.0176145	Lman2l/Ftcd/Ergic1/Man1a/Slc35c2/Pdia6/Scyl1/Gbf1/Azin2/Golga3/Nat8/Nucb2/Tmed1/Golgb1/Lman1/Ccdc115/Whamm/Rgmb/Tmed9/Cnih4/Tmed5	21
CC	GO:0099568	cytoplasmic region	70/4257	249/20678	0.0026938	0.0177021	Myo9b/Pard6a/Crip2/Nsmf/Cav1/Rhoa/Actn1/Capza2/Eps8/Med28/Dstn/Ada/Pfn1/Utrn/Ctgf/Actr2/Cobl/Sptbn1/Exoc7/Myh10/Exoc2/Rangap1/Myh9/Axin1/Ndfip1/Ap3s1/Add3/Arhgef9/Myo5b/Sept2/Wls/Macf1/Cap1/Htt/Actb/Exoc4/Gabarapl1/Gys2/Scnn1a/Coro1a/Stim1/Pqbp1/Flna/Usp2/Ppp1r9a/Phldb2/Exoc3/Eef1a1/Lasp1/Myzap/Cldn5/Pard6b/Wdr81/Stxbp6/Cdc42se1/Phldb1/Fabp1/Cfl1/Ptk2b/Flot1/Cd302/Pclo/Ap3s2/Clasp1/Akap13/Myadm/M…	70
CC	GO:0005779	integral component of peroxisomal membrane	4257-08-01	14/20678	0.0029004	0.0188672	Pex12/Pex13/Slc25a17/Pex16/Slc27a2/Pex11a/Abcd1/Pex11g	8
CC	GO:0030140	trans-Golgi network transport vesicle	4257-12-01	26/20678	0.00300907	0.0193784	Ap1s1/Slc2a4/Gopc/Rab27b/Rab14/Clta/Cltb/Aftph/Tgoln1/Tgoln2/Sort1/Lyz2	12
CC	GO:0031304	intrinsic component of mitochondrial inner membrane	4257-11-01	23/20678	0.00316441	0.020177	Spg7/Mcu/Timm23/Etfdh/Chchd6/Timm17b/Cox18/Tmem11/2410015M20Rik/Chchd3/Ppox	11
CC	GO:0098589	membrane region	101/4257	382/20678	0.00326482	0.0206132	Cav2/Hip1r/Ocrl/Ap2a2/Lipe/Aqp1/Ap1s1/Tek/Cav1/Gprc5b/Hyal2/Epn3/Abca1/Hspa8/Lamp2/Pacsin2/Slc2a4/Fyn/Reps1/Psen1/Xpo1/Pecam1/Slc9a3r1/Nup153/Ripk1/Bmpr1a/Ednrb/Lrp12/Angpt1/Emp2/Gsk3b/App/Itsn1/Cd4/Park2/Mal2/Fas/Pi4k2a/Cdhr5/Itgb1/Pikfyve/Cd55/Rgs16/Atp1b1/Fcgr2b/Lrp2/P2rx3/Lrp4/Gnas/Tlr2/Clta/Eps15/Ldhb/Atp2b2/Tnfrsf1a/Prss8/Lamtor1/Hdac6/Pllp/Slc27a1/Cdh15/Birc3/Ldlr/Tgfbr2/Gnai2/Dnm2/Myo6/Ct…	101
CC	GO:0016591	DNA-directed RNA polymerase II, holoenzyme	31/4257	94/20678	0.00333144	0.0208296	Gtf2h1/Edf1/Psmc5/Recql5/Med4/Brd4/Ercc3/Taf5/Ints4/Cdc73/Taf12/Cpsf3l/Ints1/Polr2c/Polr2m/Myo6/Ints7/Polr2l/Supt3/Polr2j/Ints8/Trrap/Taf13/Taf7/Chd6/Trp53/Wdr61/Med18/Tbpl1/Polr2g/Taf9	31
CC	GO:0000313	organellar ribosome	25/4257	72/20678	0.00372116	0.0228231	Mrpl2/Mrps24/Mrpl13/Mrpl39/Mrps23/Mrpl28/Mterf4/Mrps5/Mrps15/Mrpl20/Mrpl51/Mrps11/Mrpl17/Mrpl3/Gadd45gip1/Mrpl15/Mrpl34/Mrps26/Mrpl12/Mrps28/Ndufa7/Mrps16/Mrps21/Chchd1/Dap3	25
CC	GO:0005761	mitochondrial ribosome	25/4257	72/20678	0.00372116	0.0228231	Mrpl2/Mrps24/Mrpl13/Mrpl39/Mrps23/Mrpl28/Mterf4/Mrps5/Mrps15/Mrpl20/Mrpl51/Mrps11/Mrpl17/Mrpl3/Gadd45gip1/Mrpl15/Mrpl34/Mrps26/Mrpl12/Mrps28/Ndufa7/Mrps16/Mrps21/Chchd1/Dap3	25
CC	GO:0005778	peroxisomal membrane	18/4257	47/20678	0.00400996	0.0241347	Pxmp4/Cav1/Pex12/Acsl1/Pex13/Hmgcr/Dhrs4/Slc25a17/Pecr/Pex16/Slc27a2/Pxmp2/Pex11a/Abcd1/Pnpla8/Decr2/Impdh2/Pex11g	18
CC	GO:0031903	microbody membrane	18/4257	47/20678	0.00400996	0.0241347	Pxmp4/Cav1/Pex12/Acsl1/Pex13/Hmgcr/Dhrs4/Slc25a17/Pecr/Pex16/Slc27a2/Pxmp2/Pex11a/Abcd1/Pnpla8/Decr2/Impdh2/Pex11g	18
CC	GO:0036464	cytoplasmic ribonucleoprotein granule	40/4257	131/20678	0.00455221	0.0271446	Psmc3/Mov10/Btbd2/Pan2/Lsm2/Khsrp/Sqstm1/Psma6/Noct/Dcp2/Btbd1/Stau2/Caprin1/Rps6/Ybx1/Pnrc2/Htt/Clock/Actb/Rpl6/Pqbp1/Rbpms/Lsm6/Dcps/Psma4/Atxn2l/Lsm1/Zc3h12d/Ythdf2/Dcp1b/Ago1/Tdrkh/Zc3h12a/Dis3l2/Arntl/Trim12c/Trim5/Lsm14a/Rplp0/Polr2g	40
CC	GO:0005938	cell cortex	61/4257	217/20678	0.0048416	0.0286054	Myo9b/Pard6a/Crip2/Nsmf/Cav1/Rhoa/Actn1/Capza2/Eps8/Med28/Dstn/Pfn1/Utrn/Ctgf/Actr2/Cobl/Sptbn1/Exoc7/Myh10/Exoc2/Myh9/Axin1/Ndfip1/Add3/Arhgef9/Myo5b/Sept2/Macf1/Cap1/Actb/Exoc4/Gys2/Scnn1a/Coro1a/Stim1/Flna/Usp2/Ppp1r9a/Phldb2/Exoc3/Eef1a1/Lasp1/Myzap/Cldn5/Pard6b/Wdr81/Stxbp6/Cdc42se1/Phldb1/Fabp1/Cfl1/Ptk2b/Flot1/Cd302/Pclo/Clasp1/Akap13/Myadm/Marcks/Capza1/Fryl	61
CC	GO:0030904	retromer complex	4257-10-01	21/20678	0.00504853	0.0289117	Snx6/Vps26a/Ankfy1/Trim27/Fam21/Sdccag3/Snx5/Vps29/Vps35/Dennd4c	10
CC	GO:0031231	intrinsic component of peroxisomal membrane	4257-08-01	15/20678	0.00509997	0.0289117	Pex12/Pex13/Slc25a17/Pex16/Slc27a2/Pex11a/Abcd1/Pex11g	8
CC	GO:0045277	respiratory chain complex IV	4257-08-01	15/20678	0.00509997	0.0289117	Cox5a/Ndufa4/Cox7b/Cox4i1/Cox8a/Ndufa4l2/Cox6a1/COX1	8
CC	GO:0005874	microtubule	99/4257	379/20678	0.00519764	0.0289117	Pcnt/Gramd3/Emd/Spag5/Klc4/Rab11a/Ndrg1/Cyp2a5/Tbcb/Kif5b/Cct4/Mid1ip1/Rassf1/Kif1a/Hspa8/Appbp2/Cdk5rap3/Tube1/Kif13a/Haus4/Cct5/Gtse1/Gsk3b/Tuba1b/Synj2/Spast/Lrpprc/Axin1/Tpgs2/Hdac3/Incenp/Keg1/Tubgcp2/Cct8/Stau2/Dst/Tuba4a/Sept2/Kif26b/Dync1i2/Tcp11l1/Map1lc3a/Rmdn1/Macf1/Stmn1/Shroom3/Mtus2/Hsph1/Tuba8/Gabarapl1/Fkbp4/Kif22/Fam175b/Stim1/Hdac6/Igbp1/Haus7/Arhgap4/Katnb1/Cfap20/Map1lc3b/Zw10…	99
CC	GO:0008023	transcription elongation factor complex	18/4257	48/20678	0.00520106	0.0289117	Cdk9/Elof1/Nelfcd/Supt4a/Snw1/Elp3/Brd4/Elp2/Nelfe/Cdc73/Tceb3/Mms22l/Taf7/Thoc7/Ercc6/Tceb2/Wdr61/Ell	18
CC	GO:0005747	mitochondrial respiratory chain complex I	16/4257	41/20678	0.00525258	0.0289117	Ndufs2/Ndufa1/Ndufs6/Ndufb9/Ndufv3/Ndufb8/Ndufa10/Ndufa8/Park7/Ndufb11/Ndufv1/Ndufa7/Ndufs8/ND1/ND4L/Ndufb6	16
CC	GO:0030964	NADH dehydrogenase complex	16/4257	41/20678	0.00525258	0.0289117	Ndufs2/Ndufa1/Ndufs6/Ndufb9/Ndufv3/Ndufb8/Ndufa10/Ndufa8/Park7/Ndufb11/Ndufv1/Ndufa7/Ndufs8/ND1/ND4L/Ndufb6	16
CC	GO:0045271	respiratory chain complex I	16/4257	41/20678	0.00525258	0.0289117	Ndufs2/Ndufa1/Ndufs6/Ndufb9/Ndufv3/Ndufb8/Ndufa10/Ndufa8/Park7/Ndufb11/Ndufv1/Ndufa7/Ndufs8/ND1/ND4L/Ndufb6	16
CC	GO:0005795	Golgi stack	22/4257	63/20678	0.00580964	0.0317068	Gorasp2/Rab21/Fut8/Vrk1/Rab27b/Gbf1/Rab14/Tmem59/Rab30/Nucb2/Smpd3/Trappc4/Acpp/Nsf/Ggta1/B4galnt3/Zfyve1/Sorl1/B3galt6/B4galnt4/Chsy3/Lyz2	22
CC	GO:0030880	RNA polymerase complex	36/4257	118/20678	0.00695285	0.0374249	Gtf2h1/Edf1/Twistnb/Psmc5/Recql5/Tert/Med4/Brd4/Ercc3/Taf5/Ints4/Cdc73/Taf12/Cpsf3l/Ints1/Polr1d/Polr2c/Polr2m/Myo6/Ints7/Polr2l/Polr3k/Supt3/Polr2j/Ints8/Trrap/Taf13/Taf7/Chd6/Trp53/Wdr61/Med18/Polr1c/Tbpl1/Polr2g/Taf9	36
CC	GO:0044448	cell cortex part	38/4257	126/20678	0.00697359	0.0374249	Nsmf/Actn1/Capza2/Med28/Dstn/Utrn/Actr2/Sptbn1/Exoc7/Exoc2/Myh9/Myo5b/Sept2/Cap1/Actb/Exoc4/Gys2/Scnn1a/Coro1a/Stim1/Flna/Ppp1r9a/Phldb2/Exoc3/Eef1a1/Lasp1/Myzap/Cldn5/Stxbp6/Phldb1/Fabp1/Cfl1/Flot1/Pclo/Clasp1/Akap13/Myadm/Capza1	38
CC	GO:0000178	exosome (RNase complex)	4257-09-01	19/20678	0.00808414	0.0426694	Skiv2l2/Exosc10/Supv3l1/Pnpt1/Exosc7/Exosc8/Mphosph6/Gtpbp1/Dis3l2	9
CC	GO:1905354	exoribonuclease complex	4257-09-01	19/20678	0.00808414	0.0426694	Skiv2l2/Exosc10/Supv3l1/Pnpt1/Exosc7/Exosc8/Mphosph6/Gtpbp1/Dis3l2	9
CC	GO:0005751	mitochondrial respiratory chain complex IV	4257-07-01	13/20678	0.00824768	0.0426694	Cox5a/Ndufa4/Cox4i1/Cox8a/Ndufa4l2/Cox6a1/COX1	7
CC	GO:0016580	Sin3 complex	4257-07-01	13/20678	0.00824768	0.0426694	Hdac2/Sap30/Sin3b/Sin3a/Morf4l1/Ing2/Suds3	7
CC	GO:0070822	Sin3-type complex	4257-08-01	16/20678	0.00837609	0.0426694	Hdac2/Sap130/Sap30/Sin3b/Sin3a/Morf4l1/Ing2/Suds3	8
CC	GO:0012506	vesicle membrane	60/4257	218/20678	0.00837891	0.0426694	Cav2/Sri/Stxbp2/Aqp1/Ap1s1/Slc5a6/Cav1/Actn1/Lamp2/Appbp2/Slc2a4/Pcsk4/Rab21/Sypl/Rph3al/Vti1b/Syngr1/Ece2/Hrg/Slc26a6/Park2/Rab27b/Scyl1/Aspscr1/Pi4k2a/Pikfyve/Pam/Copa/Tor1a/Sec23b/Enpep/Clta/Eps15/Htt/Slc30a3/Anxa3/Ulk1/Anxa4/Copg1/Nck1/Acpp/Abcc4/Fndc3a/Myo6/Sec31a/Syt1/Sec24a/Tmem184a/Appl1/Sgsm1/Cltb/Agtr1a/Aftph/Vamp8/Sec31b/Cope/Dtnbp1/Copz1/Nck2/Rab9	60
CC	GO:0045121	membrane raft	83/4257	316/20678	0.00848088	0.0426694	Cav2/Lipe/Aqp1/Tek/Cav1/Gprc5b/Hyal2/Abca1/Hspa8/Lamp2/Pacsin2/Slc2a4/Fyn/Psen1/Pecam1/Slc9a3r1/Ripk1/Bmpr1a/Ednrb/Angpt1/Emp2/Gsk3b/App/Cd4/Park2/Mal2/Fas/Pi4k2a/Itgb1/Pikfyve/Cd55/Rgs16/Atp1b1/Fcgr2b/Lrp2/P2rx3/Lrp4/Gnas/Tlr2/Ldhb/Atp2b2/Tnfrsf1a/Prss8/Lamtor1/Hdac6/Pllp/Slc27a1/Cdh15/Birc3/Ldlr/Tgfbr2/Gnai2/Ctnnd1/Gpc1/Cbl/Dapk3/Eef2/Hpse/Myo1d/Fxyd1/Ctnna1/Scarb1/Nos1ap/Tlr4/S100a10/Itga1/Dmd…	83
CC	GO:0098857	membrane microdomain	83/4257	316/20678	0.00848088	0.0426694	Cav2/Lipe/Aqp1/Tek/Cav1/Gprc5b/Hyal2/Abca1/Hspa8/Lamp2/Pacsin2/Slc2a4/Fyn/Psen1/Pecam1/Slc9a3r1/Ripk1/Bmpr1a/Ednrb/Angpt1/Emp2/Gsk3b/App/Cd4/Park2/Mal2/Fas/Pi4k2a/Itgb1/Pikfyve/Cd55/Rgs16/Atp1b1/Fcgr2b/Lrp2/P2rx3/Lrp4/Gnas/Tlr2/Ldhb/Atp2b2/Tnfrsf1a/Prss8/Lamtor1/Hdac6/Pllp/Slc27a1/Cdh15/Birc3/Ldlr/Tgfbr2/Gnai2/Ctnnd1/Gpc1/Cbl/Dapk3/Eef2/Hpse/Myo1d/Fxyd1/Ctnna1/Scarb1/Nos1ap/Tlr4/S100a10/Itga1/Dmd…	83
CC	GO:0030120	vesicle coat	14/4257	36/20678	0.00909209	0.04539	Ap1s1/Scyl1/Copa/Sec23b/Clta/Eps15/Copg1/Sec31a/Sec24a/Cltb/Aftph/Sec31b/Cope/Copz1	14
CC	GO:0000428	DNA-directed RNA polymerase complex	35/4257	116/20678	0.00926186	0.0455316	Gtf2h1/Edf1/Twistnb/Psmc5/Recql5/Med4/Brd4/Ercc3/Taf5/Ints4/Cdc73/Taf12/Cpsf3l/Ints1/Polr1d/Polr2c/Polr2m/Myo6/Ints7/Polr2l/Polr3k/Supt3/Polr2j/Ints8/Trrap/Taf13/Taf7/Chd6/Trp53/Wdr61/Med18/Polr1c/Tbpl1/Polr2g/Taf9	35
CC	GO:0055029	nuclear DNA-directed RNA polymerase complex	35/4257	116/20678	0.00926186	0.0455316	Gtf2h1/Edf1/Twistnb/Psmc5/Recql5/Med4/Brd4/Ercc3/Taf5/Ints4/Cdc73/Taf12/Cpsf3l/Ints1/Polr1d/Polr2c/Polr2m/Myo6/Ints7/Polr2l/Polr3k/Supt3/Polr2j/Ints8/Trrap/Taf13/Taf7/Chd6/Trp53/Wdr61/Med18/Polr1c/Tbpl1/Polr2g/Taf9	35
CC	GO:0019898	extrinsic component of membrane	69/4257	258/20678	0.0100736	0.0491468	Cav2/S100a6/Dnaja3/Snx6/Rhoa/Gnat2/Aldh3a2/Epn3/Vac14/Yes1/Pacsin2/Cyth1/Frk/Fyn/Arsa/Synj2/Gnal/Gna14/Atg2a/Gfra1/Aspscr1/Farp1/Serpine2/Epb41l5/Nmt2/Abl1/Tor1a/Snx5/Gnas/Snx16/Srms/Pik3r3/Sytl1/Errfi1/Tec/Golga3/Ulk1/Gngt1/Gnb2/Pik3c2g/Mfge8/Prss8/Rnf40/Jak3/Pik3cb/Gnai2/Snx33/Gng11/Farp2/Gnat1/Becn1/Fermt2/Ctnna1/Mylip/Snx10/Pik3cd/Myzap/Pik3r1/Wipi1/S100a10/Zfyve1/Zc3h12a/Rpl29/Snx32/Gnai1/Pt…	69
CC	GO:0030864	cortical actin cytoskeleton	21/4257	62/20678	0.0102036	0.0494069	Actn1/Med28/Dstn/Utrn/Actr2/Sptbn1/Myh9/Sept2/Cap1/Gys2/Scnn1a/Coro1a/Ppp1r9a/Eef1a1/Lasp1/Myzap/Cldn5/Cfl1/Flot1/Akap13/Myadm	21
MF	GO:0003735	structural constituent of ribosome	110/4201	174/20358	2.50369e-34	3.5978e-31	Rpl13/Slc25a42/Mrpl2/Rps11/Slc25a1/Rpl8/Rps9/Rplp1/Rps18/Rpl10/Rps15a/Rps25/Rpl15/Rps5/Slc25a13/Rpl19/Slc25a35/Mrpl24/Rps27a/Mrps24/Slc25a48/Mrps30/Slc25a30/Mrpl13/Mrpl39/Mrps23/Mrpl28/Rps14/Slc25a45/Rps24/Rps26/Rplp2/Slc25a10/Mrps5/Rps3a1/Mrpl9/Rps20/Rps6/Mrps15/Rpl22/Mrpl20/Rpl6/Mrpl51/Mrps11/Rps3/Mrpl17/Rps4x/Rpl4/Rpsa/Mrpl3/Slc25a20/Mrpl15/Slc25a37/Mrpl34/Rps29/Rps16/Rpl10a/Mrps34/Rpl12/Rps21…	110
MF	GO:0019843	rRNA binding	39/4201	65/20358	5.00013e-12	3.59259e-09	Lipe/Rps11/Rpl8/Emg1/Rps9/Rplp1/Rps18/Rps5/Rpl19/Eral1/Mterf3/Rps14/Rplp2/Imp4/Mterf4/Mrps15/Mrpl20/Rpl6/Mrps11/Rps3/Rps4x/Imp3/Rpl4/Eef2/Rpl12/Rpl7/Tst/Ddx28/Rpl37a/Rpl9/Npm1/Rpl23a/Rpl5/Rpl11/Rpl3/Rpl17/Rplp0/Rpl23/Rps13	39
MF	GO:0048037	cofactor binding	103/4201	268/20358	1.42547e-11	5.22754e-09	Txnrd3/Idh3g/Prodh/Ndufs2/Qdpr/Hsd11b1/Cyb5r3/Acadvl/Fdxr/Etnppl/Aoc3/Sgk1/Pah/Aifm2/Ddc/Phykpl/Acly/Sptlc2/Pygl/Eci2/Srd5a1/Hmgcr/Dhfr/Glud1/Hacl1/Tkt/Sqle/Csad/Xdh/Gldc/Fasn/Got1/Shmt2/Nnt/Sirt3/Hadha/Tyms/Idh1/Acadl/Agxt/Dbi/Parp1/Marc1/Phyh/Fmo3/Fmo4/Ahcy/Acad9/Etfdh/Hadh/Bdh2/Cth/Decr1/Hmgcl/Pgd/H6pd/Mthfr/Acox3/Ugdh/Acad10/Acads/Ldhb/Idh2/Hpgd/Got2/Dus2/Acad8/Acat1/Etfa/Gclc/Me1/Lmo2/Ilvbl/…	103
MF	GO:0016874	ligase activity	136/4201	386/20358	1.45513e-11	5.22754e-09	Trim25/Rtca/Mkrn2/Hltf/Nosip/Fancl/Rnf114/Vars/Fpgs/Cars/Cad/Acsf3/Smurf2/Acsl1/Qrsl1/Acsl6/Rnf130/Rnf185/Trim11/Acaca/Rnf144a/Mthfd1/Wars/Traf3/Trim27/Trim23/Sucla2/Rnf19a/Mrpl39/Parp3/March5/Park2/Aars2/Ubr2/Rnf138/Lars/Nars/Nedd4l/Prpf19/Uhrf2/Pcx/Acsl5/Trim8/Arih1/Huwe1/Rnf41/Asnsd1/Farsb/Glul/Parp1/Eprs/Dars2/Slc27a2/Rbck1/Acss2/Tars2/Gclm/Ppcs/Yars/Paics/Brap/Aacs/Ube3b/Dtx1/Herc6/Mkrn1/Atg…	136
MF	GO:0050662	coenzyme binding	76/4201	188/20358	4.37746e-10	1.25808e-07	Txnrd3/Idh3g/Prodh/Ndufs2/Qdpr/Hsd11b1/Cyb5r3/Acadvl/Fdxr/Aifm2/Eci2/Srd5a1/Hmgcr/Dhfr/Glud1/Hacl1/Tkt/Sqle/Xdh/Fasn/Nnt/Sirt3/Hadha/Idh1/Acadl/Dbi/Parp1/Marc1/Fmo3/Fmo4/Ahcy/Acad9/Hadh/Bdh2/Decr1/Hmgcl/Pgd/H6pd/Mthfr/Acox3/Ugdh/Acad10/Acads/Ldhb/Idh2/Hpgd/Dus2/Acad8/Acat1/Etfa/Gclc/Me1/Ilvbl/Cyb5r4/Dpyd/Acbd6/Gulo/Grhpr/Aifm1/Kdm1a/Gch1/Ndufv1/Mical2/Aspdh/Htatip2/Kmo/Fmo2/Gfer/Sirt5/Hadhb/Acadm…	76
MF	GO:0016616	oxidoreductase activity, acting on the CH-OH group of donors, NAD or NADP as acceptor	56/4201	126/20358	1.39028e-09	3.32973e-07	Idh3g/Wwox/Rdh13/Kdsr/Dhdh/Hsd11b1/Mdh2/Akr1c13/Hmgcr/Dhrs4/Ehhadh/Fasn/Rdh5/Hsd17b6/Hadha/Adhfe1/Idh1/Hsd17b7/Gpd2/Hsd17b12/Bmp2/Idh3b/Hadh/Bdh2/Ptgr1/Pgd/H6pd/Fam213b/Ugdh/Hsd17b11/Akr1b8/Ldhb/Idh2/Nsdhl/Hpgd/Hsd17b2/Me1/Spr/Grhpr/Aifm1/Htatip2/Rdh7/Hsd3b7/Akr1e1/Cbr1/Rdh9/Hadhb/Hsd3b3/Impdh2/Ldha/Hsd3b2/Dhrs3/Rdh11/Rdh16/Ptgr2/Adh1	56
MF	GO:0016829	lyase activity	73/4201	183/20358	1.92807e-09	3.95805e-07	Ftcd/Ddt/Cyp17a1/Mvd/Apip/Odc1/Aldoc/Cenpv/Etnppl/Pcbd1/Ddc/Phykpl/Hacl1/Tgds/Ntan1/Umps/Ehhadh/Csad/Fech/Gldc/Fasn/Got1/Poll/Shmt2/Echs1/Sirt3/Hadha/Xrcc5/Scly/Pam/Glul/Fh1/Car3/Car2/Gucy1b3/Cth/Aldob/Alad/Aco1/Hmgcl/Park7/Cd38/Paics/Rps3/Hccs/Car5b/Naxd/Car7/Neil1/Me1/Uba5/Hacd3/Tkfc/Uroc1/Car14/Kyat1/Kyat3/Car8/Gucy2c/Npl/Fahd1/Hmga1/Eno4/Ggcx/Sirt5/Thnsl2/Hadhb/Tor3a/Hacd1/Eno1/Mocs1/Macrod2/…	73
MF	GO:0016614	oxidoreductase activity, acting on CH-OH group of donors	62/4201	151/20358	8.44119e-09	1.51625e-06	Idh3g/Wwox/Rdh13/Kdsr/Aldh3a2/Dhdh/Hsd11b1/Mdh2/Dhrs13/Akr1c13/Hmgcr/Dhrs4/Ehhadh/Xdh/Fasn/Rdh5/Hsd17b6/Hadha/Adhfe1/Idh1/Hsd17b7/Gpd2/Hsd17b12/Bmp2/Idh3b/Hadh/Bdh2/Ptgr1/Pgd/H6pd/Fam213b/Ugdh/Hsd17b11/Akr1b8/Ldhb/Idh2/Nsdhl/Hpgd/Hsd17b2/Me1/Spr/Gulo/Hsd17b13/Grhpr/Aifm1/Htatip2/Rdh7/Hsd3b7/Akr1e1/Cbr1/Rdh9/Hadhb/Hsd3b3/Impdh2/Ldha/Aox1/Hsd3b2/Dhrs3/Rdh11/Rdh16/Ptgr2/Adh1	62
MF	GO:0098641	cadherin binding involved in cell-cell adhesion	96/4201	276/20358	2.89324e-08	4.16843e-06	Trim25/Snd1/Emd/Pkn2/Cnn2/Chmp2b/Ndrg1/Eif4g2/Clint1/Kif5b/Rpl15/Hspa8/Pacsin2/Pfn1/Sptbn1/Rack1/Rtn4/Rab10/Ahsa1/Eif5/Ywhaz/Eif3e/Rangap1/Myh9/Plec/Lima1/Krt18/Hsp90ab1/Ehd1/Scyl1/Fasn/Flnb/Rps26/Baiap2/Eps8l2/Dock9/Cct8/Itgb1/Idh1/Stat1/Sept2/Fam129b/Sh3glb2/Nop56/Snx5/Ptpn1/Eif2a/Chmp5/Ubap2/Tln1/Eps15/Lypla2/Prdx1/Park7/Arhgef16/Paics/Ran/Golga3/Rpl6/Zc3hav1/Unc45a/Pak4/Parva/Flna/Hcfc1/Mre11…	96
MF	GO:0009055	electron carrier activity	37/4201	75/20358	2.90079e-08	4.16843e-06	Cox5a/Txnrd3/Cyba/Cox7c/Glrx2/Acadvl/Glrx/Cyc1/Xdh/Cox7a2l/Acadl/Ptges2/Acad9/Etfdh/Sh3bgrl3/Acox3/Acad10/Acads/Ndufa4/Glrx3/Cox7b/Cox4i1/Acad8/Etfa/Cox8a/Ndufa4l2/Cox6a1/Cox10/Cox6b2/Acadm/Aox1/COX1/COX2/COX3/CYTB/Cox7a1/Acad11	37
MF	GO:0098632	protein binding involved in cell-cell adhesion	96/4201	283/20358	1.14203e-07	1.4919e-05	Trim25/Snd1/Emd/Pkn2/Cnn2/Chmp2b/Ndrg1/Eif4g2/Clint1/Kif5b/Rpl15/Hspa8/Pacsin2/Pfn1/Sptbn1/Rack1/Rtn4/Rab10/Ahsa1/Eif5/Ywhaz/Eif3e/Rangap1/Myh9/Plec/Lima1/Krt18/Hsp90ab1/Ehd1/Scyl1/Fasn/Flnb/Rps26/Baiap2/Eps8l2/Dock9/Cct8/Itgb1/Idh1/Stat1/Sept2/Fam129b/Sh3glb2/Nop56/Snx5/Ptpn1/Eif2a/Chmp5/Ubap2/Tln1/Eps15/Lypla2/Prdx1/Park7/Arhgef16/Paics/Ran/Golga3/Rpl6/Zc3hav1/Unc45a/Pak4/Parva/Flna/Hcfc1/Mre11…	96
MF	GO:0098631	protein binding involved in cell adhesion	97/4201	288/20358	1.4459e-07	1.73147e-05	Trim25/Snd1/Emd/Pkn2/Cnn2/Chmp2b/Ndrg1/Eif4g2/Clint1/Kif5b/Rpl15/Hspa8/Pacsin2/Pfn1/Sptbn1/Rack1/Rtn4/Rab10/Ahsa1/Eif5/Ywhaz/Eif3e/Rangap1/Myh9/Plec/Lima1/Krt18/Hsp90ab1/Ehd1/Scyl1/Fasn/Flnb/Rps26/Baiap2/Eps8l2/Dock9/Cct8/Itgb1/Idh1/Stat1/Sept2/Fam129b/Sh3glb2/Nop56/Snx5/Ptpn1/Eif2a/Chmp5/Ubap2/Tln1/Eps15/Lypla2/Prdx1/Park7/Arhgef16/Paics/Ran/Golga3/Rpl6/Zc3hav1/Unc45a/Pak4/Parva/Flna/Hcfc1/Mre11…	97
MF	GO:0045296	cadherin binding	98/4201	297/20358	3.72258e-07	4.11488e-05	Trim25/Snd1/Emd/Pkn2/Cnn2/Chmp2b/Ndrg1/Eif4g2/Clint1/Kif5b/Rpl15/Hspa8/Pacsin2/Pfn1/Psen1/Sptbn1/Rack1/Rtn4/Rab10/Ahsa1/Eif5/Ywhaz/Eif3e/Rangap1/Myh9/Plec/Lima1/Krt18/Hsp90ab1/Ehd1/Scyl1/Fasn/Flnb/Rps26/Baiap2/Eps8l2/Dock9/Cct8/Itgb1/Idh1/Stat1/Sept2/Fam129b/Sh3glb2/Nop56/Snx5/Ptpn1/Eif2a/Chmp5/Ubap2/Tln1/Eps15/Lypla2/Prdx1/Park7/Arhgef16/Paics/Ran/Golga3/Rpl6/Zc3hav1/Unc45a/Pak4/Parva/Flna/Hcfc1…	98
MF	GO:0016765	transferase activity, transferring alkyl or aryl (other than methyl) groups	30/4201	60/20358	4.01233e-07	4.11837e-05	Eef1e1/Gstm7/Gstm3/Srm/Dhdds/Fnta/Fdft1/Gsto1/Pdss1/Gstm4/Cth/Nans/Trit1/Mmab/Gstt2/Fntb/Mat1a/Gstp2/Rabggtb/Rabggta/Gstm2/Cox10/Ubiad1/Mat2a/Gstm1/Fdps/Gstm6/Eef1g/Sms/Gsta1	30
MF	GO:0051082	unfolded protein binding	33/4201	70/20358	6.14522e-07	5.88712e-05	Pfdn5/Calr/Dnaja3/Aamp/Pfdn2/Cct4/Clpx/Hspa8/Calr3/Hsp90b1/Erlec1/Hsp90aa1/Cct5/St13/Hsp90ab1/Pfdn6/Pfdn1/Grpel2/Cdc37l1/Cct8/Tor1a/Mkks/Srsf10/Ube4b/Dnaja4/Dnajb5/Tbce/Nudcd3/Npm1/Tcp1/Ptges3/Hspe1/Tomm20	33
MF	GO:0016627	oxidoreductase activity, acting on the CH-CH group of donors	46/4201	113/20358	9.04072e-07	8.11969e-05	Sdhd/Blvra/Wwox/Rdh13/Dhdh/Gfod2/Acadvl/Aifm2/Akr1c13/Srd5a1/Cpox/Fasn/Acadl/Pecr/Marc1/Acad9/Bdh2/Decr1/Ptgr1/Hsdl2/Acox3/Acad10/Acads/Heph/Tecr/Dus2/Acad8/Etfa/Dpyd/Frrs1/Vat1/Acaa1a/Decr2/Aifm1/Kdm1a/Rsad1/Htatip2/Hsd3b7/Gfod1/Retsat/Dhcr7/Pyroxd2/Ppox/Acadm/Ptgr2/Acad11	46
MF	GO:0008135	translation factor activity, RNA binding	36/4201	82/20358	1.64747e-06	0.00013926	Eef1e1/Eif4g2/Mtrf1l/Cpeb4/Eif5/Eif3h/Eif3e/Eif4a2/Etf1/Cpeb1/Eef1b2/Eif5b/Eif3m/Eif3j1/Eif2a/Eif2b3/Eif4g3/Eif3i/Eif2b1/Eif3c/Eif3f/Eefsec/Eef2/Eef2k/Eif1/Eef1a1/Efl1/Cpeb3/Tsfm/Gtpbp1/Eef1d/Eif1a/Eif4b/Gspt1/Eif1ax/Eef1g	36
MF	GO:0016878	acid-thiol ligase activity	17/4201	27/20358	2.13263e-06	0.000170255	Acsf3/Acsl1/Acsl6/Sucla2/Acsl5/Slc27a2/Acss2/Aacs/Slc27a5/Acsm3/Acsm5/Acsl4/Slc27a1/Acsl3/Acsm1/Suclg1/Acsf2	17
MF	GO:0016879	ligase activity, forming carbon-nitrogen bonds	92/4201	286/20358	2.83103e-06	0.000214115	Mkrn2/Hltf/Nosip/Fancl/Rnf114/Fpgs/Cad/Smurf2/Qrsl1/Rnf130/Rnf185/Trim11/Acaca/Rnf144a/Mthfd1/Traf3/Trim27/Trim23/Rnf19a/March5/Park2/Ubr2/Rnf138/Nedd4l/Prpf19/Uhrf2/Pcx/Trim8/Arih1/Huwe1/Rnf41/Asnsd1/Glul/Rbck1/Gclm/Ppcs/Paics/Brap/Ube3b/Dtx1/Herc6/Mkrn1/Herc2/Rnf40/Nadsyn1/Rnf128/Wwp2/Birc3/Gclc/Ube2cbp/March3/Mycbp2/Rnf125/Faah/Cbl/Ube2f/Neurl1b/Trim13/Hectd1/Topors/Rnf139/Mex3c/Egr2/Rnf144b/M…	92
MF	GO:0016835	carbon-oxygen lyase activity	36/4201	84/20358	3.27876e-06	0.000233584	Apip/Etnppl/Pcbd1/Tgds/Ntan1/Ehhadh/Fasn/Echs1/Sirt3/Hadha/Xrcc5/Fh1/Car3/Car2/Alad/Aco1/Park7/Rps3/Car5b/Naxd/Car7/Neil1/Uba5/Hacd3/Uroc1/Car14/Car8/Hmga1/Eno4/Sirt5/Thnsl2/Hadhb/Tor3a/Hacd1/Eno1/Macrod2	36
MF	GO:0016836	hydro-lyase activity	30/4201	65/20358	3.41354e-06	0.000233584	Apip/Pcbd1/Tgds/Ntan1/Ehhadh/Fasn/Echs1/Sirt3/Hadha/Fh1/Car3/Car2/Alad/Aco1/Park7/Car5b/Naxd/Car7/Uba5/Hacd3/Uroc1/Car14/Car8/Eno4/Sirt5/Hadhb/Tor3a/Hacd1/Eno1/Macrod2	30
MF	GO:0016877	ligase activity, forming carbon-sulfur bonds	21/4201	39/20358	4.84954e-06	0.000316763	Acsf3/Acsl1/Acsl6/Sucla2/Acsl5/Slc27a2/Acss2/Aacs/Atg7/Slc27a5/Acsm3/Acsm5/Acsl4/Slc27a1/Uba5/Uba7/Acsl3/Acsm1/Suclg1/Uba2/Acsf2	21
MF	GO:0070180	large ribosomal subunit rRNA binding	4201-09-01	10/20358	5.48964e-06	0.000342983	Rplp1/Rpl19/Rplp2/Rpl12/Rpl37a/Rpl23a/Rpl17/Rplp0/Rpl23	9
MF	GO:0008565	protein transporter activity	35/4201	85/20358	1.30178e-05	0.000779443	Ap2a2/Tomm40/Kpna6/Ap1s1/Tomm40l/Ap1b1/Tnpo3/Timm23/Vps26a/Xpo1/Timm9/Zfyve16/Kpna3/Tomm22/Gpihbp1/Dscr3/Ap3s1/Timm10/Vps29/Pgap2/Timm17b/Vps35/Ramp1/Ap2b1/Cox18/Unc93b1/Ipo9/Ipo11/Calcrl/Itgb1bp1/Hikeshi/Ap3s2/Ipo7/Rap1a/Tomm20	35
MF	GO:0004497	monooxygenase activity	49/4201	134/20358	1.46562e-05	0.000842437	Cyp51/Cyp2c29/Cyp17a1/Cyp2a5/Cyp2j9/Cmah/Pah/Pcbd1/Sqle/Cyp39a1/Cyp4f14/Cyp21a1/Cyp2c55/Cyp2c39/Cyp2c44/Cyp2e1/Pam/Fmo3/Fmo4/Cyp2u1/Cyp7a1/Cyp4a31/Cyp4b1/Cyp4a14/Cyp3a25/Cyp3a13/Coq7/Msmo1/Cyp1a2/Mical2/Kmo/Fmo2/Cyp2c37/Cyp2g1/Agmo/Cyp8b1/Cyp2c50/Cyp3a11/Cyp2a12/Cyp2c70/Cyp3a59/Cyp26b1/Cyp4a32/Cyp4a12a/Cyp4a10/Cyp2c54/Cyp2a4/Cyp2c68/Cyp2d12	49
MF	GO:0015078	hydrogen ion transmembrane transporter activity	38/4201	96/20358	1.67832e-05	0.000927596	Cox5a/Atp5f1/Tcirg1/Atp5d/Atp4a/Slc47a1/Atp6v0e/Cox7c/Atp5g3/Atp6v0a1/Slc36a1/Slc46a1/Atp6v1c1/Cox7a2l/Atp5b/Atp5c1/Atp6v0d2/Ndufa4/Slc9a9/Cox7b/Cox4i1/Atp6v0b/Cox8a/Uqcrfs1/Atp5l/Ndufa4l2/Cox6a1/Cox10/Atp5k/Cox6b2/Uqcr10/Uqcrh/COX1/COX2/ATP6/COX3/CYTB/Cox7a1	38
MF	GO:0003729	mRNA binding	60/4201	175/20358	1.75693e-05	0.000935078	Hnrnpd/Calr/Khsrp/Rbm25/Rps5/Cpeb4/Cluh/Hsp90aa1/Dhfr/Mrpl13/Ncbp2/Noct/Fech/Rps14/Rps26/Cpeb1/Tyms/Tsn/Rbm38/Fxr1/Rps3a1/Aco1/Rps6/Ybx1/Park7/G3bp2/Rpl6/Luc7l2/Mrps11/Rps3/Rnf40/Rbmx/Eefsec/Thoc5/Secisbp2l/Paip2/Lsm1/Eef1a1/Rara/Cpeb3/Dxo/Pum3/Tardbp/Dcp1b/Mvk/Zc3h12a/Rpl7/Rps2/Mex3d/A1cf/Rpl5/Hnrnpa3/Hnrnpc/Qk/Rpl35/Srsf3/Tut1/Rpl13a/BC005561/Rps13	60
MF	GO:0052689	carboxylic ester hydrolase activity	58/4201	168/20358	1.90707e-05	0.000978734	Abhd15/Pon1/Lipe/Vars/Pla2g12b/Lpl/Acot8/Acot2/Acot3/Acot12/Ntan1/Rgn/Lars/Lipa/Chka/Sirt3/Lypla1/Car2/Nceh1/Bche/Pla2g12a/Lypla2/Park7/H6pd/Plbd2/Pon3/Pla2g15/Aars/Lipc/Pon2/Abhd10/Faah/Acot11/Lars2/Lcat/Pnpla8/Pnpla7/Pafah2/Aspg/Vars2/Abhd2/Daglb/Baat/Abhd4/Pnpla3/Pla2g6/Ces2b/Acot4/Sirt5/Ces2a/Ces1d/Ces1g/Ces1c/Ces4a/Gdpd1/Macrod2/Acot1/Ces1b	58
MF	GO:0050661	NADP binding	20/4201	39/20358	2.12611e-05	0.00102588	Qdpr/Hsd11b1/Fdxr/Srd5a1/Hmgcr/Dhfr/Fasn/Nnt/Idh1/Fmo3/Fmo4/Decr1/Pgd/H6pd/Mthfr/Me1/Dpyd/Grhpr/Aspdh/Fmo2	20
MF	GO:0015645	fatty acid ligase activity	13/4201	20/20358	2.14172e-05	0.00102588	Acsf3/Acsl1/Acsl6/Sucla2/Acsl5/Slc27a2/Slc27a5/Acsm3/Acsl4/Slc27a1/Acsl3/Acsm1/Acsf2	13
MF	GO:0003924	GTPase activity	65/4201	195/20358	2.23678e-05	0.00103686	Mx1/Rab23/Rab11a/Gtpbp3/Rhoa/Gnat2/Rhot1/Rab32/Tube1/Rab21/Dnajc27/Rab10/Eral1/Eftud2/Trim23/Gtpbp8/Tuba1b/Gnl1/Rab27b/Gnal/Gna14/Atl3/Gnl3l/Agap2/Eif5b/Tuba4a/Sept2/Rab14/Gnas/Rit1/Gem/Gnl2/Ran/Gngt1/Gnb2/Tuba8/Arhgdib/Rerg/Gnai2/Eefsec/Dnm2/Gnat1/Eef2/Tbcc/Tubb4b/Mmaa/Eef1a1/Rras/Efl1/Gtpbp1/Tuba1c/Irgm1/Arl4a/Rap1b/Gnai1/Atl2/Gspt1/Tubb4a/Gpn1/Rap1a/Gm4951/Rab11b/Igtp/Rab9/Rasl2-9	65
MF	GO:0019787	ubiquitin-like protein transferase activity	118/4201	410/20358	4.70907e-05	0.00207662	Trim25/Rmnd5b/Rmnd5a/Hltf/Nosip/Fancl/Rnf114/Ube2g2/Ube2z/Ube2a/Med24/Smurf2/Pex12/Rnf145/Sumo3/Rnf130/Ube2b/Rnf185/Trim11/Rnf144a/Traf3/Trim27/Trim23/Ube2e1/Fbxl3/Rnf19a/Fbxo32/Sharpin/March5/Park2/Ubr2/Rnf138/Nedd4l/Prpf19/Uhrf2/Trim8/Btrc/Arih1/Huwe1/Rabgef1/Rnf41/Ube2l6/Rbck1/Fbxw7/Ube4b/Klhl7/Brap/Ube3b/Cul1/Herc6/Mkrn1/Med21/Herc2/Rnf40/Cul4b/Rnf128/Wwp2/Med17/Birc3/Uba7/Rnf125/Cacul1/Vhl/C…	118
MF	GO:0008137	NADH dehydrogenase (ubiquinone) activity	17/4201	32/20358	4.91337e-05	0.00207662	Ndufs2/Ndufb9/Ndufb8/Ndufa10/Ndufa8/Ndufaf1/Ndufa4/Ndufv1/Ndufa4l2/Ndufa7/Ndufs8/ND1/ND2/ND4/ND5/ND6/ND4L	17
MF	GO:0050136	NADH dehydrogenase (quinone) activity	17/4201	32/20358	4.91337e-05	0.00207662	Ndufs2/Ndufb9/Ndufb8/Ndufa10/Ndufa8/Ndufaf1/Ndufa4/Ndufv1/Ndufa4l2/Ndufa7/Ndufs8/ND1/ND2/ND4/ND5/ND6/ND4L	17
MF	GO:0051536	iron-sulfur cluster binding	27/4201	63/20358	5.35994e-05	0.00208672	Pole/Ndufs2/Cmah/Glrx2/Rsad2/Elp3/Xdh/Fech/Iscu/Prim2/Etfdh/Cisd2/Aco1/Glrx3/Ciapin1/Dpyd/Nubpl/Cisd1/Ndufv1/Uqcrfs1/Rsad1/Nubp2/Isca1/Fxn/Ndufs8/Aox1/Mocs1	27
MF	GO:0051540	metal cluster binding	27/4201	63/20358	5.35994e-05	0.00208672	Pole/Ndufs2/Cmah/Glrx2/Rsad2/Elp3/Xdh/Fech/Iscu/Prim2/Etfdh/Cisd2/Aco1/Glrx3/Ciapin1/Dpyd/Nubpl/Cisd1/Ndufv1/Uqcrfs1/Rsad1/Nubp2/Isca1/Fxn/Ndufs8/Aox1/Mocs1	27
MF	GO:0005525	GTP binding	101/4201	342/20358	5.40399e-05	0.00208672	Mx1/Rnd2/Rhoc/Rab23/Rab11a/Gtpbp3/Rhoa/Gnat2/Rabl6/Lrrk1/Ift27/Rnd3/Rhot1/Anxa6/Rab32/Tube1/Rab21/Sar1b/Arf5/Drg2/Dnajc27/Rab10/Rasl10b/Eral1/Eftud2/Hsp90aa1/Eif5/Trim23/Glud1/Gtpbp8/Tuba1b/Rab12/Hsp90ab1/Ehd3/Ercc3/Gnl1/Rab27b/Gnal/Gna14/Atl3/Ehd1/Gnl3l/Agap2/Arl10/Eif5b/Tuba4a/Sept2/Rab14/Gnas/Gucy1b3/Rit1/Gem/Nudt2/Gnl2/Eif2b1/Ran/Arl8b/Tuba8/Rerg/Fkbp4/Rab30/Rab6b/Srprb/Gnai2/Eefsec/Dnm2/Acsm…	101
MF	GO:0004842	ubiquitin-protein transferase activity	114/4201	395/20358	5.51812e-05	0.00208672	Trim25/Rmnd5b/Rmnd5a/Hltf/Nosip/Fancl/Rnf114/Ube2g2/Ube2z/Ube2a/Med24/Smurf2/Pex12/Rnf145/Rnf130/Ube2b/Rnf185/Trim11/Rnf144a/Traf3/Trim27/Trim23/Ube2e1/Fbxl3/Rnf19a/Fbxo32/Sharpin/March5/Park2/Ubr2/Rnf138/Nedd4l/Prpf19/Uhrf2/Trim8/Btrc/Arih1/Huwe1/Rabgef1/Rnf41/Rbck1/Fbxw7/Ube4b/Klhl7/Brap/Ube3b/Cul1/Herc6/Mkrn1/Med21/Herc2/Rnf40/Cul4b/Rnf128/Wwp2/Med17/Birc3/Uba7/Rnf125/Cacul1/Vhl/Cbl/Ube2f/Asb1…	114
MF	GO:0016746	transferase activity, transferring acyl groups	77/4201	247/20358	5.83537e-05	0.00213635	Kat2b/Zdhhc4/Naa20/Crot/Lpcat3/Cs/Ggt5/Elovl1/Zdhhc24/Mogat1/Zdhhc12/Cers2/Med24/Tada2a/Acly/Sptlc2/Elovl2/Lpcat1/Oxsm/Naa16/Elp3/Tgm1/Kansl2/Acat2/Qpct/Sap130/Keg1/Cpt1a/Taf5/Fasn/Zdhhc16/Hadha/Nmt2/Crat/Hmgcs2/Zdhhc21/Cpt2/Clock/Agpat9/Nat8/Zdhhc13/Dgat2/Kat8/Hcfc1/Pla2g15/Acat1/Lipc/Nat8f2/Agpat1/Lcat/Gtf3c4/Acaa1a/Naa30/Sh3glb1/Tgm2/Phf20/Elovl3/Supt3/Baat/Ggt6/Elovl6/Ggact/Pnpla3/Usp22/Sptss…	77
MF	GO:0050660	flavin adenine dinucleotide binding	32/4201	80/20358	5.9467e-05	0.00213635	Txnrd3/Prodh/Cyb5r3/Acadvl/Aifm2/Sqle/Xdh/Acadl/Fmo3/Fmo4/Acad9/Mthfr/Acox3/Acad10/Acads/Dus2/Acad8/Etfa/Cyb5r4/Dpyd/Gulo/Aifm1/Kdm1a/Mical2/Kmo/Fmo2/Gfer/Acadm/Ddo/Aox1/Cry2/Acad11	32
MF	GO:0004129	cytochrome-c oxidase activity	15/4201	27/20358	6.92651e-05	0.00231474	Cox5a/Cox7c/Cox7a2l/Ndufa4/Cox7b/Cox4i1/Cox8a/Ndufa4l2/Cox6a1/Cox10/Cox6b2/COX1/COX2/COX3/Cox7a1	15
MF	GO:0015002	heme-copper terminal oxidase activity	15/4201	27/20358	6.92651e-05	0.00231474	Cox5a/Cox7c/Cox7a2l/Ndufa4/Cox7b/Cox4i1/Cox8a/Ndufa4l2/Cox6a1/Cox10/Cox6b2/COX1/COX2/COX3/Cox7a1	15
MF	GO:0016676	oxidoreductase activity, acting on a heme group of donors, oxygen as acceptor	15/4201	27/20358	6.92651e-05	0.00231474	Cox5a/Cox7c/Cox7a2l/Ndufa4/Cox7b/Cox4i1/Cox8a/Ndufa4l2/Cox6a1/Cox10/Cox6b2/COX1/COX2/COX3/Cox7a1	15
MF	GO:0016881	acid-amino acid ligase activity	78/4201	253/20358	7.92198e-05	0.00258725	Mkrn2/Hltf/Nosip/Fancl/Rnf114/Fpgs/Smurf2/Rnf130/Rnf185/Trim11/Rnf144a/Traf3/Trim27/Trim23/Rnf19a/March5/Park2/Ubr2/Rnf138/Nedd4l/Prpf19/Uhrf2/Trim8/Arih1/Huwe1/Rnf41/Rbck1/Gclm/Ppcs/Paics/Brap/Ube3b/Dtx1/Herc6/Mkrn1/Herc2/Rnf40/Rnf128/Wwp2/Birc3/Gclc/Ube2cbp/March3/Mycbp2/Rnf125/Cbl/Ube2f/Neurl1b/Trim13/Hectd1/Topors/Rnf139/Mex3c/Egr2/Rnf144b/Mylip/Smurf1/March6/Stub1/Dtx4/Cbx4/Ufl1/Rfwd2/Ttc3/R…	78
MF	GO:0003954	NADH dehydrogenase activity	17/4201	33/20358	8.18985e-05	0.00261529	Ndufs2/Ndufb9/Ndufb8/Ndufa10/Ndufa8/Ndufaf1/Ndufa4/Ndufv1/Ndufa4l2/Ndufa7/Ndufs8/ND1/ND2/ND4/ND5/ND6/ND4L	17
MF	GO:0016887	ATPase activity	116/4201	407/20358	8.50652e-05	0.00265736	Atp5f1/Spg7/Tcirg1/Clpb/Psmc3/Hltf/Atp5d/Myo9b/Crbn/Atp4a/Dhx34/Atp7b/Gtf2h1/Kif5b/Dqx1/Kif1a/Abca1/Clpx/Atp6v0e/Hspa8/Lonrf3/Dhx40/Atp5g3/Abca5/Rad51d/Atp6v0a1/Ddx39b/Nudt4/Supv3l1/Ddx52/Psmc5/Recql5/Abcc3/Myh10/Hsp90aa1/Kif13a/Wrnip1/Ddx46/Atp6v1c1/Myh9/Cpox/Eif4a2/Spast/Tap2/Ercc3/Atp9b/Smarca2/Atp5b/Atp5c1/Xrcc5/Mcm6/Ddx59/Kif26b/Atp1b1/Tor1b/Tor1a/Abca2/Atp9a/Anxa5/Chd1l/Atp6v0d2/Vcp/Macf1/A…	116
MF	GO:0031072	heat shock protein binding	37/4201	99/20358	9.21238e-05	0.00281664	Chordc1/Cdkn1b/Bax/Tfam/Dnaja3/Mvd/Faf1/Hspa8/Hdac2/Pttg1/St13/Park2/Telo2/Bag6/Cdc37l1/Stip1/Stau2/Npas2/Gucy1b3/Ulk1/Limk1/Fkbp4/Unc45a/Rps3/Hdac6/Eif2ak3/Dnaja4/Fgf1/Atf5/Stub1/Bcor/Adora1/Arntl/Bak1/Hikeshi/Eno1/Ptges3	37
MF	GO:0050839	cell adhesion molecule binding	124/4201	441/20358	9.42772e-05	0.00282242	Trim25/Snd1/Itga3/Emd/Calr/Pkn2/Cnn2/Chmp2b/Ndrg1/Eif4g2/Clint1/Kif5b/Rpl15/Actn1/Hspa8/Pacsin2/Pfn1/Utrn/Psen1/Ctgf/Igf1/Sptbn1/Rack1/Rtn4/Rab10/Ahsa1/Eif5/Nisch/Ywhaz/Eif3e/Rangap1/Myh9/Emp2/Plec/Nectin3/Gsk3b/Lima1/Krt18/Hsp90ab1/Ehd1/Scyl1/Gfra1/Fasn/Flnb/Rps26/Baiap2/Cdhr5/Eps8l2/Dock9/Cct8/Itgb1/Idh1/Stat1/Sept2/Fam129b/Sh3glb2/Itga4/Nop56/Snx5/Ptpn1/Postn/Eif2a/Cd1d1/Chmp5/Ubap2/Tln1/Eps15…	124
MF	GO:0016860	intramolecular oxidoreductase activity	22/4201	49/20358	0.000112548	0.00330066	Mri1/Ptgds/Pdia6/Tmx1/Eci2/Ebpl/Txndc11/Ehhadh/Eci1/Ptges2/Pdia3/Erp27/Ebp/Qsox2/Gpi1/Txndc5/Ptges/Rpia/Ech1/Hsd3b3/Hsd3b2/Ptges3	22
MF	GO:0008047	enzyme activator activity	118/4201	418/20358	0.000114959	0.00330392	Apoh/Gm2a/Hk2/Ocrl/Rin2/Sipa1l2/Gtf2f1/Prkra/Apoc2/Cdkn1b/Grk5/Psap/Myo9b/Cav1/Rplp1/Gprc5b/Vac14/Evi5/Clpx/Stard13/Erbb3/Noxo1/Igf1/Nprl3/Rack1/Igfbp3/Fam20a/Rabep1/Ahsa1/Gdi2/Tbc1d7/Rasa1/Psme1/Rangap1/Adck5/App/Itsn1/Cdkn1a/Tiam2/Pdpk1/Axin1/Bad/Fn3k/Agap2/Rptor/Smap1/Rgs16/Atp1b1/Rgs5/Rabgap1l/Arfgap2/Bmp2/Arfgap1/Alpk1/Cks1b/Vcp/Plaa/Azin2/Sh3bgrl3/Arhgef19/Park7/Rgs12/Tbc1d14/Pcolce/Agfg2/A…	118
MF	GO:0016675	oxidoreductase activity, acting on a heme group of donors	15/4201	28/20358	0.000120763	0.00340269	Cox5a/Cox7c/Cox7a2l/Ndufa4/Cox7b/Cox4i1/Cox8a/Ndufa4l2/Cox6a1/Cox10/Cox6b2/COX1/COX2/COX3/Cox7a1	15
MF	GO:0031406	carboxylic acid binding	54/4201	164/20358	0.000151643	0.00419015	Pparg/Gnmt/Prodh/Cad/Ptgds/Fabp7/Pah/Ddc/Acaca/Pygl/Dhfr/Glud1/Dpys/Aars2/Ubr2/Brd4/Cyp4f14/Gldc/Pcx/Got1/Shmt2/Agxt/Pam/Glul/Phyh/Fmo3/Lcn12/Fabp5/Tdo2/P3h1/Hmgcl/Cyp4a14/Pgd/Acox3/Gfpt1/Got2/Aars/Pin1/Gclc/Grhpr/Sh3glb1/Mat1a/Rara/Hlcs/Acacb/Gchfr/Mat2a/Fabp1/S100a8/Egln2/Alox5ap/Cyp26b1/Ugt1a1/Ugt1a9	54
MF	GO:0016651	oxidoreductase activity, acting on NAD(P)H	31/4201	80/20358	0.000154543	0.00419015	Txnrd3/Cyba/Ndufs2/Cyb5r3/Txndc17/Nxn/Dhrs4/Ndufb9/Ndufb8/Nnt/Ndufa10/Ndufa8/Ndufaf1/Ndufa4/Nox4/Cyb5r4/Nxnl1/Aifm1/Ndufv1/Kmo/Ndufa4l2/Ndufa7/Cbr1/Ndufs8/ND1/ND2/ND4/ND5/ND6/ND4L/Ecsit	31
MF	GO:0051287	NAD binding	25/4201	60/20358	0.000172765	0.00448447	Idh3g/Ndufs2/Qdpr/Cyb5r3/Glud1/Nnt/Sirt3/Hadha/Idh1/Parp1/Ahcy/Hadh/Bdh2/Ugdh/Ldhb/Idh2/Hpgd/Me1/Grhpr/Ndufv1/Htatip2/Sirt5/Hadhb/Aox1/Adh1	25
MF	GO:0019001	guanyl nucleotide binding	104/4201	364/20358	0.000173653	0.00448447	Mx1/Rnd2/Rhoc/Rab23/Rab11a/Gtpbp3/Rhoa/Gnat2/Rabl6/Lrrk1/Ift27/Rnd3/Rhot1/Anxa6/Rab32/Tube1/Rab21/Sar1b/Arf5/Drg2/Dnajc27/Rab10/Rasl10b/Eral1/Eftud2/Hsp90aa1/Eif5/Trim23/Glud1/Gtpbp8/Tuba1b/Rab12/Hsp90ab1/Ehd3/Ercc3/Gnl1/Rab27b/Gnal/Gna14/Atl3/Ehd1/Gnl3l/Agap2/Prps2/Arl10/Eif5b/Tuba4a/Sept2/Rab14/Gnas/Samhd1/Gucy1b3/Rit1/Gem/Nudt2/Gnl2/Eif2b1/Ran/Arl8b/Tuba8/Rerg/Fkbp4/Rab30/Rab6b/Srprb/Gnai2/Eef…	104
MF	GO:0004386	helicase activity	53/4201	161/20358	0.00017476	0.00448447	Mov10/Hltf/Mcm2/Mcm5/Dhx34/Dqx1/Skiv2l2/Dhx58/Dhx40/Ddx39b/Nudt4/Supv3l1/Ddx52/Recql5/Ddx46/Eif4a2/Ercc3/Smarca2/Peo1/Prim2/Xrcc5/Mcm6/Ddx59/Ifih1/Uap1l1/Mcm8/Gins1/Chd1l/Dhx15/Ddx55/Recql/Blm/Nudt7/Gins2/Mre11a/Smarca4/Ttf2/Ddx19b/Recql4/Ino80/Dhx57/Primpol/Ddx58/Dxo/Dhx33/Ddx24/Mcm3/Ispd/Ddx28/Nudt6/Chd6/Upf1/Chd2	53
MF	GO:0043168	anion binding	81/4201	271/20358	0.000183575	0.00453667	Pparg/Akt1/Gnmt/Prodh/Cad/Ptgds/Pacsin2/Etnppl/Fabp7/Pah/Ddc/Phykpl/Acaca/Sptlc2/Pygl/Dhfr/Glud1/Pnp/Dpys/Clcn2/Csad/Aars2/Ubr2/Brd4/Fam21/Cyp4f14/Gldc/Pcx/Got1/Gbf1/Shmt2/Agxt/Pam/Glul/Marc1/Phyh/Fmo3/Lcn12/Fabp5/Nceh1/Tdo2/Cth/P3h1/Hmgcl/Cyp4a14/Pgd/Clcn6/Acox3/Gfpt1/Ctsc/Got2/Aars/Pin1/Gclc/Snx14/Grhpr/Clcn7/Sh3glb1/Mat1a/Rara/Mapkap1/Kyat1/Kyat3/Accs/Hlcs/Wipi1/Acacb/Zfyve1/Gchfr/Mat2a/Fabp1/…	81
MF	GO:0031593	polyubiquitin binding	20/4201	44/20358	0.000185759	0.00453667	Rad23a/Ubqln4/Tab2/Sqstm1/Tnip1/Prpf8/Sharpin/Bag6/Vcp/Eps15/Zfand6/Fam175b/Zranb1/Hdac6/Agl/Ikbke/Bre/Tnip2/Parp10/Ubxn1	20
MF	GO:0008766	UDP-N-acetylmuramoylalanyl-D-glutamyl-2,6-diaminopimelate-D-alanyl-D-alanine ligase activity	73/4201	240/20358	0.000208365	0.00453667	Mkrn2/Hltf/Nosip/Fancl/Rnf114/Smurf2/Rnf130/Rnf185/Trim11/Rnf144a/Traf3/Trim27/Trim23/Rnf19a/March5/Park2/Ubr2/Rnf138/Nedd4l/Prpf19/Uhrf2/Trim8/Arih1/Huwe1/Rnf41/Rbck1/Brap/Ube3b/Dtx1/Herc6/Mkrn1/Herc2/Rnf40/Rnf128/Wwp2/Birc3/Ube2cbp/March3/Mycbp2/Rnf125/Cbl/Ube2f/Neurl1b/Trim13/Hectd1/Topors/Rnf139/Mex3c/Egr2/Rnf144b/Mylip/Smurf1/March6/Stub1/Dtx4/Cbx4/Ufl1/Rfwd2/Ttc3/Rnf123/Arel1/Hecw2/Hectd3/N…	73
MF	GO:0018169	ribosomal S6-glutamic acid ligase activity	73/4201	240/20358	0.000208365	0.00453667	Mkrn2/Hltf/Nosip/Fancl/Rnf114/Smurf2/Rnf130/Rnf185/Trim11/Rnf144a/Traf3/Trim27/Trim23/Rnf19a/March5/Park2/Ubr2/Rnf138/Nedd4l/Prpf19/Uhrf2/Trim8/Arih1/Huwe1/Rnf41/Rbck1/Brap/Ube3b/Dtx1/Herc6/Mkrn1/Herc2/Rnf40/Rnf128/Wwp2/Birc3/Ube2cbp/March3/Mycbp2/Rnf125/Cbl/Ube2f/Neurl1b/Trim13/Hectd1/Topors/Rnf139/Mex3c/Egr2/Rnf144b/Mylip/Smurf1/March6/Stub1/Dtx4/Cbx4/Ufl1/Rfwd2/Ttc3/Rnf123/Arel1/Hecw2/Hectd3/N…	73
MF	GO:0043773	coenzyme F420-0 gamma-glutamyl ligase activity	73/4201	240/20358	0.000208365	0.00453667	Mkrn2/Hltf/Nosip/Fancl/Rnf114/Smurf2/Rnf130/Rnf185/Trim11/Rnf144a/Traf3/Trim27/Trim23/Rnf19a/March5/Park2/Ubr2/Rnf138/Nedd4l/Prpf19/Uhrf2/Trim8/Arih1/Huwe1/Rnf41/Rbck1/Brap/Ube3b/Dtx1/Herc6/Mkrn1/Herc2/Rnf40/Rnf128/Wwp2/Birc3/Ube2cbp/March3/Mycbp2/Rnf125/Cbl/Ube2f/Neurl1b/Trim13/Hectd1/Topors/Rnf139/Mex3c/Egr2/Rnf144b/Mylip/Smurf1/March6/Stub1/Dtx4/Cbx4/Ufl1/Rfwd2/Ttc3/Rnf123/Arel1/Hecw2/Hectd3/N…	73
MF	GO:0043774	coenzyme F420-2 alpha-glutamyl ligase activity	73/4201	240/20358	0.000208365	0.00453667	Mkrn2/Hltf/Nosip/Fancl/Rnf114/Smurf2/Rnf130/Rnf185/Trim11/Rnf144a/Traf3/Trim27/Trim23/Rnf19a/March5/Park2/Ubr2/Rnf138/Nedd4l/Prpf19/Uhrf2/Trim8/Arih1/Huwe1/Rnf41/Rbck1/Brap/Ube3b/Dtx1/Herc6/Mkrn1/Herc2/Rnf40/Rnf128/Wwp2/Birc3/Ube2cbp/March3/Mycbp2/Rnf125/Cbl/Ube2f/Neurl1b/Trim13/Hectd1/Topors/Rnf139/Mex3c/Egr2/Rnf144b/Mylip/Smurf1/March6/Stub1/Dtx4/Cbx4/Ufl1/Rfwd2/Ttc3/Rnf123/Arel1/Hecw2/Hectd3/N…	73
MF	GO:0070735	protein-glycine ligase activity	73/4201	240/20358	0.000208365	0.00453667	Mkrn2/Hltf/Nosip/Fancl/Rnf114/Smurf2/Rnf130/Rnf185/Trim11/Rnf144a/Traf3/Trim27/Trim23/Rnf19a/March5/Park2/Ubr2/Rnf138/Nedd4l/Prpf19/Uhrf2/Trim8/Arih1/Huwe1/Rnf41/Rbck1/Brap/Ube3b/Dtx1/Herc6/Mkrn1/Herc2/Rnf40/Rnf128/Wwp2/Birc3/Ube2cbp/March3/Mycbp2/Rnf125/Cbl/Ube2f/Neurl1b/Trim13/Hectd1/Topors/Rnf139/Mex3c/Egr2/Rnf144b/Mylip/Smurf1/March6/Stub1/Dtx4/Cbx4/Ufl1/Rfwd2/Ttc3/Rnf123/Arel1/Hecw2/Hectd3/N…	73
MF	GO:0070736	protein-glycine ligase activity, initiating	73/4201	240/20358	0.000208365	0.00453667	Mkrn2/Hltf/Nosip/Fancl/Rnf114/Smurf2/Rnf130/Rnf185/Trim11/Rnf144a/Traf3/Trim27/Trim23/Rnf19a/March5/Park2/Ubr2/Rnf138/Nedd4l/Prpf19/Uhrf2/Trim8/Arih1/Huwe1/Rnf41/Rbck1/Brap/Ube3b/Dtx1/Herc6/Mkrn1/Herc2/Rnf40/Rnf128/Wwp2/Birc3/Ube2cbp/March3/Mycbp2/Rnf125/Cbl/Ube2f/Neurl1b/Trim13/Hectd1/Topors/Rnf139/Mex3c/Egr2/Rnf144b/Mylip/Smurf1/March6/Stub1/Dtx4/Cbx4/Ufl1/Rfwd2/Ttc3/Rnf123/Arel1/Hecw2/Hectd3/N…	73
MF	GO:0070737	protein-glycine ligase activity, elongating	73/4201	240/20358	0.000208365	0.00453667	Mkrn2/Hltf/Nosip/Fancl/Rnf114/Smurf2/Rnf130/Rnf185/Trim11/Rnf144a/Traf3/Trim27/Trim23/Rnf19a/March5/Park2/Ubr2/Rnf138/Nedd4l/Prpf19/Uhrf2/Trim8/Arih1/Huwe1/Rnf41/Rbck1/Brap/Ube3b/Dtx1/Herc6/Mkrn1/Herc2/Rnf40/Rnf128/Wwp2/Birc3/Ube2cbp/March3/Mycbp2/Rnf125/Cbl/Ube2f/Neurl1b/Trim13/Hectd1/Topors/Rnf139/Mex3c/Egr2/Rnf144b/Mylip/Smurf1/March6/Stub1/Dtx4/Cbx4/Ufl1/Rfwd2/Ttc3/Rnf123/Arel1/Hecw2/Hectd3/N…	73
MF	GO:0070738	tubulin-glycine ligase activity	73/4201	240/20358	0.000208365	0.00453667	Mkrn2/Hltf/Nosip/Fancl/Rnf114/Smurf2/Rnf130/Rnf185/Trim11/Rnf144a/Traf3/Trim27/Trim23/Rnf19a/March5/Park2/Ubr2/Rnf138/Nedd4l/Prpf19/Uhrf2/Trim8/Arih1/Huwe1/Rnf41/Rbck1/Brap/Ube3b/Dtx1/Herc6/Mkrn1/Herc2/Rnf40/Rnf128/Wwp2/Birc3/Ube2cbp/March3/Mycbp2/Rnf125/Cbl/Ube2f/Neurl1b/Trim13/Hectd1/Topors/Rnf139/Mex3c/Egr2/Rnf144b/Mylip/Smurf1/March6/Stub1/Dtx4/Cbx4/Ufl1/Rfwd2/Ttc3/Rnf123/Arel1/Hecw2/Hectd3/N…	73
MF	GO:0003995	acyl-CoA dehydrogenase activity	4201-11-01	18/20358	0.000212122	0.00454954	Acadvl/Acadl/Acad9/Acox3/Acad10/Acads/Acad8/Etfa/Rsad1/Acadm/Acad11	11
MF	GO:0042623	ATPase activity, coupled	91/4201	313/20358	0.000224035	0.0047344	Atp5f1/Spg7/Tcirg1/Psmc3/Atp5d/Myo9b/Crbn/Atp4a/Dhx34/Atp7b/Gtf2h1/Dqx1/Abca1/Clpx/Atp6v0e/Hspa8/Lonrf3/Dhx40/Atp5g3/Abca5/Rad51d/Atp6v0a1/Ddx39b/Nudt4/Supv3l1/Ddx52/Psmc5/Recql5/Abcc3/Myh10/Ddx46/Atp6v1c1/Myh9/Cpox/Eif4a2/Spast/Tap2/Ercc3/Atp9b/Atp5b/Atp5c1/Xrcc5/Mcm6/Ddx59/Atp1b1/Abca2/Atp9a/Anxa5/Atp6v0d2/Abcb8/Dhx15/Rfc5/Ddx55/Abcb9/Abcg2/Recql/Atp2b2/Blm/Myh14/Abcd1/Atp11a/Nudt7/Katnb1/Mre11…	91
MF	GO:0033218	amide binding	83/4201	281/20358	0.00023637	0.00492266	Ftcd/Gnmt/Csnk1g2/Kpna6/Calr/Gstm7/Phb2/Thop1/Apba3/Tnpo3/Hspa8/Lta4h/Fnta/H2-M2/Pex7/Avpr1a/Pex13/Srp68/Slc46a1/Nup153/Ctsl/Srd5a1/Dhfr/Nln/Ppif/Kpna3/Itm2b/Ednrb/Npr3/Lnpep/Tap2/Ercc3/Ppic/Pcsk5/Rps6kb2/Fasn/Tyms/Itgb1/Slc40a1/Rnpepl1/Itgav/Anxa5/Gstm4/Tlr2/Enpep/Cd1d1/Clta/Tm2d1/Apbb2/Brap/Itm2a/Bace1/Hcrtr2/Fntb/H2-Q4/Tap1/Gstp2/Gstm2/Inhba/Pik3r1/Rnpep/Cltb/Ldlrad3/Agtr1a/Sorl1/Ptges/H2-T24/…	83
MF	GO:0032561	guanyl ribonucleotide binding	103/4201	363/20358	0.000245866	0.00504728	Mx1/Rnd2/Rhoc/Rab23/Rab11a/Gtpbp3/Rhoa/Gnat2/Rabl6/Lrrk1/Ift27/Rnd3/Rhot1/Anxa6/Rab32/Tube1/Rab21/Sar1b/Arf5/Drg2/Dnajc27/Rab10/Rasl10b/Eral1/Eftud2/Hsp90aa1/Eif5/Trim23/Glud1/Gtpbp8/Tuba1b/Rab12/Hsp90ab1/Ehd3/Ercc3/Gnl1/Rab27b/Gnal/Gna14/Atl3/Ehd1/Gnl3l/Agap2/Prps2/Arl10/Eif5b/Tuba4a/Sept2/Rab14/Gnas/Gucy1b3/Rit1/Gem/Nudt2/Gnl2/Eif2b1/Ran/Arl8b/Tuba8/Rerg/Fkbp4/Rab30/Rab6b/Srprb/Gnai2/Eefsec/Dnm…	103
MF	GO:0016830	carbon-carbon lyase activity	21/4201	48/20358	0.000250036	0.00506059	Ddt/Cyp17a1/Mvd/Odc1/Aldoc/Ddc/Hacl1/Umps/Csad/Got1/Shmt2/Glul/Aldob/Hmgcl/Paics/Me1/Npl/Fahd1/Ggcx/Mocs1/Mlycd	21
MF	GO:0020037	heme binding	41/4201	118/20358	0.000255113	0.00509163	Cyp51/Cyp2c29/Cyp17a1/Cyp2a5/Cyba/Pxdn/Cyc1/Dgcr8/Cyp39a1/Cyp4f14/Cyp21a1/Fech/Cyp2c55/Cyp2c39/Cyp2e1/Cyp2u1/Gucy1b3/Tdo2/Cyp7a1/Prdx1/Cyp4b1/Cyp4a14/Cyp3a25/Cyp3a13/Ido2/Cyb5b/Cyp1a2/Cyb5r4/Mfsd7c/Cyp2c37/Cyp8b1/Cyp2c50/Cyp3a11/Cyp2a12/Cyp2c70/Cyp26b1/COX1/Cyp4a12a/Cyp4a10/Cyp2c54/Cyp2a4	41
MF	GO:0016757	transferase activity, transferring glycosyl groups	85/4201	290/20358	0.00026493	0.00521513	Sdf2/Man1a/Man2b1/Mgat1/Galnt10/Fut8/Pygl/Hexb/Pnp/Tymp/Gbe1/St3gal6/Umps/Pigp/Parp3/Rfng/Hexa/Parp6/Pdcl3/Parp1/Pigc/Dpm2/Upp2/St3gal3/Extl1/Ppat/Zc3hav1/Rpn1/Art4/Gys2/Qprt/Magt1/B3gnt3/St3gal4/Alg9/Stt3a/Man2c1/Stt3b/Colgalt2/Agl/Alg3/Pomt2/Colgalt1/Eogt/Ggta1/Ugt2b35/Alg12/Parp2/Mgat5/Gtdc1/A4gnt/Galnt18/Edem2/B3galnt2/Pomt1/Alg1/Alg2/Dnph1/B4galnt3/C1galt1/Krtcap2/Dpy19l3/B3gntl1/C1galt1c1/C…	85
MF	GO:0070740	tubulin-glutamic acid ligase activity	73/4201	242/20358	0.000274578	0.00533201	Mkrn2/Hltf/Nosip/Fancl/Rnf114/Smurf2/Rnf130/Rnf185/Trim11/Rnf144a/Traf3/Trim27/Trim23/Rnf19a/March5/Park2/Ubr2/Rnf138/Nedd4l/Prpf19/Uhrf2/Trim8/Arih1/Huwe1/Rnf41/Rbck1/Brap/Ube3b/Dtx1/Herc6/Mkrn1/Herc2/Rnf40/Rnf128/Wwp2/Birc3/Ube2cbp/March3/Mycbp2/Rnf125/Cbl/Ube2f/Neurl1b/Trim13/Hectd1/Topors/Rnf139/Mex3c/Egr2/Rnf144b/Mylip/Smurf1/March6/Stub1/Dtx4/Cbx4/Ufl1/Rfwd2/Ttc3/Rnf123/Arel1/Hecw2/Hectd3/N…	73
MF	GO:0016655	oxidoreductase activity, acting on NAD(P)H, quinone or similar compound as acceptor	19/4201	42/20358	0.00028883	0.00553398	Ndufs2/Dhrs4/Ndufb9/Ndufb8/Ndufa10/Ndufa8/Ndufaf1/Ndufa4/Ndufv1/Ndufa4l2/Ndufa7/Cbr1/Ndufs8/ND1/ND2/ND4/ND5/ND6/ND4L	19
MF	GO:0005085	guanyl-nucleotide exchange factor activity	58/4201	184/20358	0.000326104	0.00616594	Vav2/Cyth1/Net1/Arhgef3/Trio/Itsn1/Tiam2/Plce1/Dnmbp/Gbf1/Rabgef1/Eps8l2/Farp1/Dock9/Arhgef9/Ngef/Rgl1/Psd4/Rgp1/Eif2b3/Arhgef19/Arhgef16/Eif2b1/Lamtor1/St5/Trappc4/Dock6/Nck1/Arhgef17/Rasgrp2/Fgd5/Farp2/Tbc1d10a/Ankrd27/Fnip1/Psd/Ranbp10/Plekhg2/Dennd4c/Plekhg6/Fbxo8/Sbf2/Ric1/Ralgps1/Prex1/Fnbp1l/Madd/Dennd6a/Arhgef1/Arhgef37/Trappc1/Dock8/Dennd1b/Rab3ip/Akap13/Nck2/Rap1a/Lamtor3	58
MF	GO:0008391	arachidonic acid monooxygenase activity	21/4201	49/20358	0.000353152	0.00659065	Cyp2c29/Cyp2a5/Cyp2j9/Cyp4f14/Cyp2c55/Cyp2c39/Cyp2c44/Cyp2e1/Cyp4a31/Cyp4a14/Cyp2c37/Cyp2g1/Cyp2c50/Cyp2a12/Cyp2c70/Cyp4a32/Cyp4a10/Cyp2c54/Cyp2a4/Cyp2c68/Cyp2d12	21
MF	GO:0070739	protein-glutamic acid ligase activity	73/4201	244/20358	0.000359328	0.00661993	Mkrn2/Hltf/Nosip/Fancl/Rnf114/Smurf2/Rnf130/Rnf185/Trim11/Rnf144a/Traf3/Trim27/Trim23/Rnf19a/March5/Park2/Ubr2/Rnf138/Nedd4l/Prpf19/Uhrf2/Trim8/Arih1/Huwe1/Rnf41/Rbck1/Brap/Ube3b/Dtx1/Herc6/Mkrn1/Herc2/Rnf40/Rnf128/Wwp2/Birc3/Ube2cbp/March3/Mycbp2/Rnf125/Cbl/Ube2f/Neurl1b/Trim13/Hectd1/Topors/Rnf139/Mex3c/Egr2/Rnf144b/Mylip/Smurf1/March6/Stub1/Dtx4/Cbx4/Ufl1/Rfwd2/Ttc3/Rnf123/Arel1/Hecw2/Hectd3/N…	73
MF	GO:0051020	GTPase binding	89/4201	309/20358	0.000366756	0.00667125	Ocrl/Myo9b/Ndrg1/Pard6a/Lsm2/Cav1/Evi5/Abca1/Eps8/Rab11fip4/Pfn1/Wasf1/Xpo1/Sptbn1/Ankfy1/Rph3al/Net1/Gdi2/Hsp90aa1/Exoc2/Tbc1d7/Nup153/Rasa1/Lcp1/Rangap1/March5/Hdac3/Ehd1/Plce1/Rabgef1/Rnf41/Farp1/Dock9/Myo5b/Pde6d/Eprs/Rabgap1l/Rgp1/Ybx1/Sytl1/Errfi1/Arhgef16/Tbc1d14/Ulk1/Gnb2/Exoc4/Arhgdib/Stx4a/Flna/Arhgap4/Rab11fip1/Ppp1r9a/Brk1/Nsf/Tbc1d10a/Diaph2/Ankrd27/Dapk3/Rusc2/Fmnl2/Nxt1/Ranbp10/Inf…	89
MF	GO:0016747	transferase activity, transferring acyl groups other than amino-acyl groups	66/4201	217/20358	0.00040826	0.00733337	Kat2b/Zdhhc4/Naa20/Crot/Lpcat3/Elovl1/Zdhhc24/Mogat1/Zdhhc12/Cers2/Med24/Tada2a/Sptlc2/Elovl2/Lpcat1/Oxsm/Naa16/Elp3/Kansl2/Acat2/Sap130/Keg1/Cpt1a/Taf5/Fasn/Zdhhc16/Hadha/Nmt2/Crat/Zdhhc21/Cpt2/Clock/Agpat9/Nat8/Zdhhc13/Dgat2/Kat8/Hcfc1/Pla2g15/Acat1/Nat8f2/Agpat1/Lcat/Gtf3c4/Acaa1a/Naa30/Sh3glb1/Phf20/Elovl3/Supt3/Baat/Elovl6/Pnpla3/Usp22/Sptssa/Mcat/Mogat2/Lclat1/Hadhb/Acnat2/Acnat1/Gm4952/Taf…	66
MF	GO:0043021	ribonucleoprotein complex binding	40/4201	117/20358	0.00043984	0.00780308	Letm1/Snrpb2/Mtrf1l/Cpeb4/Pttg1/Srp68/Eral1/Spcs1/Naa16/Pim1/Bag6/Cpeb1/Stau2/Imp4/Ifih1/Snrpb/Eif2a/Mtor/Sec61a1/Eif3c/Pqbp1/Rbm3/Imp3/Rpsa/Eefsec/Eef2/Secisbp2l/Efl1/Cpeb3/Ppp1ca/Gcn1l1/Zc3h12a/Sec61b/Npm1/Eif1a/Eif4b/Hnrnpc/Rpl35a/Rpl35/Snrpe	40
MF	GO:0004659	prenyltransferase activity	4201-09-01	14/20358	0.000486496	0.00842283	Dhdds/Fnta/Fdft1/Fntb/Rabggtb/Rabggta/Cox10/Ubiad1/Fdps	9
MF	GO:0005161	platelet-derived growth factor receptor binding	4201-09-01	14/20358	0.000486496	0.00842283	Pten/Rasa1/Ptprj/Pdgfa/Pdgfc/Pdgfra/Vegfd/Pdgfd/Pik3r1	9
MF	GO:0000062	fatty-acyl-CoA binding	16/4201	34/20358	0.000500355	0.00855965	Acadvl/Eci2/Hadha/Acadl/Dbi/Acad9/Hmgcl/Acox3/Acad10/Acads/Acad8/Etfa/Acbd6/Hadhb/Acadm/Acad11	16
MF	GO:0019207	kinase regulator activity	61/4201	199/20358	0.000528817	0.00894012	Hk2/Kat2b/Ccne1/Cdkn1b/Grk5/Hspb1/Rplp1/Gprc5b/Hyal2/Vac14/Chp1/H2afy/Erbb3/Dcn/Igf1/Rack1/Fam20a/Akap11/Elp3/Adck5/Itsn1/Cdkn1a/Hsp90ab1/Ccny/Csnk2b/Fn3k/Agap2/Rptor/Spred1/Pkia/Alpk1/Cks1b/Ccne2/Cdkn2c/Podn/Pik3r3/Gas6/Dus2/Nck1/Trib1/Ankrd54/Pomk/Cdkn1c/Rara/Alpk3/Pik3r1/Gcn1l1/Grk3/Rtn4rl1/Lrtm1/Adck2/Flrt3/Lrrc15/Ercc6/Npm1/Cks2/Ccni/Fgfr1op/Strada/Ccnd1/Lamtor3	61
MF	GO:0046906	tetrapyrrole binding	42/4201	126/20358	0.000585096	0.00977654	Cyp51/Cd320/Cyp2c29/Cyp17a1/Cyp2a5/Cyba/Pxdn/Cyc1/Dgcr8/Cyp39a1/Cyp4f14/Cyp21a1/Fech/Cyp2c55/Cyp2c39/Cyp2e1/Cyp2u1/Gucy1b3/Tdo2/Cyp7a1/Prdx1/Cyp4b1/Cyp4a14/Cyp3a25/Cyp3a13/Ido2/Cyb5b/Cyp1a2/Cyb5r4/Mfsd7c/Cyp2c37/Cyp8b1/Cyp2c50/Cyp3a11/Cyp2a12/Cyp2c70/Cyp26b1/COX1/Cyp4a12a/Cyp4a10/Cyp2c54/Cyp2a4	42
MF	GO:0052890	oxidoreductase activity, acting on the CH-CH group of donors, with a flavin as acceptor	4201-10-01	17/20358	0.000638615	0.0104568	Acadvl/Acadl/Acad9/Acox3/Acad10/Acads/Acad8/Etfa/Acadm/Acad11	10
MF	GO:0003727	single-stranded RNA binding	28/4201	75/20358	0.000640359	0.0104568	Dhx58/Pnpt1/Zc3h14/Mterf3/Khdrbs3/Lactb2/Mterf4/Ifih1/Strbp/Fxr1/Rbmx/Rbpms/Paip2/Ddx60/Endov/Cbx4/Ddx58/Ago1/Rbm7/Tlr7/Paip2b/A1cf/Dis3l2/Eif4b/Hnrnpc/Rps7/Lsm14a/Polr2g	28
MF	GO:0016705	oxidoreductase activity, acting on paired donors, with incorporation or reduction of molecular oxygen	63/4201	209/20358	0.000705097	0.0113845	Cyp51/Cyp2c29/Cyp17a1/Hmox2/Cyp2a5/Fads1/Cyp2j9/Cmah/Pah/Pcbd1/Sqle/Cyp39a1/Cyp4f14/Cyp21a1/Fads3/Cyp2c55/Cyp2c39/Cyp2c44/Cyp2e1/Pam/Phyh/Fmo3/Fmo4/Cyp2u1/Cyp7a1/P3h1/Cyp4a31/Cyp4b1/Cyp4a14/Cyp3a25/Cyp3a13/Coq7/Msmo1/Sc5d/Cyp1a2/Scd1/Kdm6a/Mical2/Degs1/9130409I23Rik/6430573F11Rik/Kmo/Fmo2/Cyp2c37/Fads6/Cyp2g1/Agmo/Cyp8b1/Cyp2c50/Fto/Cyp3a11/Egln2/Cyp2a12/Cyp2c70/Cyp3a59/Cyp26b1/Cyp4a32/Cyp4a12a/C…	63
MF	GO:0001871	pattern binding	4201-11-01	20/20358	0.000741274	0.0115331	Prg4/Susd2/Enpp3/Gpcpd1/Tinagl1/Agl/Enpp1/Stbd1/Epm2a/Cd209b/Clec4g	11
MF	GO:0030247	polysaccharide binding	4201-11-01	20/20358	0.000741274	0.0115331	Prg4/Susd2/Enpp3/Gpcpd1/Tinagl1/Agl/Enpp1/Stbd1/Epm2a/Cd209b/Clec4g	11
MF	GO:0016712	oxidoreductase activity, acting on paired donors, with incorporation or reduction of molecular oxygen, reduced flavin or flavoprotein as one donor, and incorporation of one atom of oxygen	16/4201	35/20358	0.000746403	0.0115331	Cyp2c29/Cyp2c55/Cyp2c39/Cyp2e1/Cyp2u1/Cyp4b1/Cyp3a25/Cyp3a13/Cyp1a2/Cyp2c37/Cyp2c50/Cyp3a11/Cyp2a12/Cyp2c70/Cyp4a12a/Cyp2c54	16
MF	GO:0031369	translation initiation factor binding	16/4201	35/20358	0.000746403	0.0115331	Eif2ak4/Tbl2/Eif4ebp2/Angel1/Eif5/Rps24/Eif3m/Rps3a1/Eif3c/Eif3f/Eif2ak3/Nck1/Gch1/Rps19/Cacna1c/Polr2g	16
MF	GO:0070330	aromatase activity	15/4201	32/20358	0.000785785	0.0120125	Cyp2c29/Cyp2c55/Cyp2c39/Cyp2u1/Cyp4b1/Cyp3a25/Cyp3a13/Cyp1a2/Cyp2c37/Cyp2c50/Cyp3a11/Cyp2a12/Cyp2c70/Cyp4a12a/Cyp2c54	15
MF	GO:1901681	sulfur compound binding	67/4201	226/20358	0.000800741	0.0121123	Apoh/Gstm7/Col5a3/Fgfr4/Aamp/Fgfrl1/Bmp7/Lpl/Acadvl/Rspo3/Ctgf/Eci2/Fgf9/Hrg/App/Cxcl13/Thbs2/Smoc2/Hadha/Nrp2/Acadl/Serpine2/Dbi/Hsd17b12/Acad9/Postn/Gstm4/Hmgcl/Rpl22/Acox3/Lrpap1/Acad10/Acads/Pcolce/Tpk1/Sult1a1/Chst15/Fgfr1/F11/Adgrg1/Acad8/Apoa5/Lipc/Etfa/Acbd6/Gpc1/Cxcl10/Impg2/Hpse/Ccl2/Fgf1/Gstp2/Thbs1/Gstm2/Atp1a3/Rpl29/Grem2/Ptges/Nav2/Col13a1/Col25a1/Hadhb/Wisp3/Acadm/Saa1/Acad11/Tpbgl	67
MF	GO:0005088	Ras guanyl-nucleotide exchange factor activity	39/4201	117/20358	0.000900547	0.0134801	Vav2/Net1/Arhgef3/Trio/Itsn1/Tiam2/Dnmbp/Rabgef1/Eps8l2/Farp1/Dock9/Arhgef9/Ngef/Rgl1/Rgp1/Arhgef19/Arhgef16/St5/Trappc4/Arhgef17/Fgd5/Farp2/Ranbp10/Plekhg2/Dennd4c/Plekhg6/Sbf2/Ric1/Ralgps1/Prex1/Madd/Dennd6a/Arhgef1/Arhgef37/Trappc1/Dennd1b/Rab3ip/Akap13/Rap1a	39
MF	GO:0016758	transferase activity, transferring hexosyl groups	59/4201	195/20358	0.000922693	0.0135512	Sdf2/Mgat1/Galnt10/Fut8/Pygl/Hexb/Tymp/Gbe1/Pigp/Rfng/Hexa/Pigc/Dpm2/Extl1/Rpn1/Gys2/Magt1/B3gnt3/Alg9/Stt3a/Stt3b/Colgalt2/Agl/Alg3/Pomt2/Colgalt1/Eogt/Ggta1/Ugt2b35/Alg12/Mgat5/A4gnt/Galnt18/B3galnt2/Pomt1/Alg1/Alg2/B4galnt3/C1galt1/Krtcap2/Dpy19l3/B3gntl1/C1galt1c1/Ccdc126/B3galt6/B3glct/B4galt3/Ugt2b5/B4galnt4/Chsy3/Ext1/Ugt2b38/Ugt2b36/B3gat3/Ugt3a1/Alg6/Ugt1a1/Ugt1a6b/Ugt1a9	59
MF	GO:0061630	ubiquitin protein ligase activity	60/4201	199/20358	0.000924161	0.0135512	Trim25/Hltf/Nosip/Fancl/Rnf114/Ube2g2/Ube2z/Ube2a/Med24/Rnf145/Ube2b/Rnf185/Trim11/Rnf144a/Rnf19a/Park2/Ubr2/Rnf138/Nedd4l/Prpf19/Uhrf2/Btrc/Arih1/Rabgef1/Rnf41/Ube4b/Brap/Cul1/Herc6/Med21/Cul4b/Rnf128/Wwp2/Med17/Rnf125/Cacul1/Vhl/Cbl/Ube2f/Hectd1/Topors/Rnf139/Rnf144b/Mylip/Smurf1/Stub1/Rfwd2/Neurl3/Rnf152/Fbxo30/Fbxo40/Rnf149/Rnf7/Kcmf1/Fbxo6/Rnf181/Ube4a/Rnf217/Med18/Ube2u	60
MF	GO:0004694	eukaryotic translation initiation factor 2alpha kinase activity	4201-09-01	15/20358	0.000993464	0.0144203	Grk5/Eif2ak4/Adck5/Eif2ak2/Alpk1/Eif2ak3/Alpk3/Grk3/Adck2	9
MF	GO:0019199	transmembrane receptor protein kinase activity	30/4201	85/20358	0.00121885	0.0175148	Acvr1b/Grk5/Fgfr4/Tek/Fgfrl1/Met/Erbb3/Bmpr1a/Adck5/Nrp2/Alpk1/Ntrk1/Epha7/Pdgfra/Ephb4/Fgfr1/Nptn/Tgfbr2/Ryk/Tie1/Ror1/Alpk3/Grk3/Adck2/Acvr2a/Fgfr3/Ntrk2/Erbb4/Kdr/Mup1	30
MF	GO:0016289	CoA hydrolase activity	14/4201	30/20358	0.00123579	0.0175626	Acot8/Acot2/Acot3/Acot12/Lypla1/Them4/Lypla2/Park7/Nudt7/Acot11/Baat/Acot4/Haghl/Acot1	14
MF	GO:0016875	ligase activity, forming carbon-oxygen bonds	18/4201	43/20358	0.00127571	0.0175626	Vars/Cars/Wars/Mrpl39/Aars2/Lars/Nars/Farsb/Eprs/Dars2/Tars2/Yars/Tarsl2/Aars/Lars2/Vars2/Mars/Sars2	18
MF	GO:0016876	ligase activity, forming aminoacyl-tRNA and related compounds	18/4201	43/20358	0.00127571	0.0175626	Vars/Cars/Wars/Mrpl39/Aars2/Lars/Nars/Farsb/Eprs/Dars2/Tars2/Yars/Tarsl2/Aars/Lars2/Vars2/Mars/Sars2	18
MF	GO:0030145	manganese ion binding	18/4201	43/20358	0.00127571	0.0175626	Ppm1m/Ppm1a/Nek4/Pim1/Mtpap/Dcp2/Xpnpep1/Fam20c/Glul/Abl1/Impa1/Dyrk2/Hmgcl/Cdipt/Nudt7/Mre11a/Me1/Npepl1	18
MF	GO:0016645	oxidoreductase activity, acting on the CH-NH group of donors	13/4201	27/20358	0.00128328	0.0175626	Prodh/Qdpr/Aifm2/Mthfd1/Dhfr/Pycrl/Paox/Etfdh/Mthfr/Aass/Aldh1l1/Aifm1/Mthfd1l	13
MF	GO:0043130	ubiquitin binding	35/4201	104/20358	0.00133033	0.0180348	Rad23a/Tax1bp1/Hspb1/Ubqln4/Faf1/Tab2/Sqstm1/Cry1/Tnip1/Ubxn2a/Prpf8/Sharpin/Park2/Bag6/Ube2l6/Rbck1/Cks1b/Vcp/Eps15/Dyrk2/Brap/Zfand6/Fam175b/Zranb1/Hdac6/Agl/Ikbke/Bre/Per2/Ide/Tnip2/Cks2/Parp10/Cry2/Ubxn1	35
MF	GO:0043022	ribosome binding	20/4201	50/20358	0.00138112	0.0185483	Letm1/Mtrf1l/Cpeb4/Pttg1/Spcs1/Naa16/Bag6/Cpeb1/Stau2/Eif2a/Mtor/Sec61a1/Eif3c/Rpsa/Eef2/Efl1/Cpeb3/Gcn1l1/Zc3h12a/Sec61b	20
MF	GO:0004467	long-chain fatty acid-CoA ligase activity	4201-08-01	13/20358	0.00154068	0.0204996	Acsl1/Acsl6/Acsl5/Slc27a2/Slc27a5/Acsl4/Slc27a1/Acsl3	8
MF	GO:0008392	arachidonic acid epoxygenase activity	19/4201	47/20358	0.00155589	0.020512	Cyp2c29/Cyp2a5/Cyp2j9/Cyp2c55/Cyp2c39/Cyp2c44/Cyp2e1/Cyp4a31/Cyp2c37/Cyp2g1/Cyp2c50/Cyp2a12/Cyp2c70/Cyp4a32/Cyp4a10/Cyp2c54/Cyp2a4/Cyp2c68/Cyp2d12	19
MF	GO:0061659	ubiquitin-like protein ligase activity	60/4201	203/20358	0.00157272	0.0205454	Trim25/Hltf/Nosip/Fancl/Rnf114/Ube2g2/Ube2z/Ube2a/Med24/Rnf145/Ube2b/Rnf185/Trim11/Rnf144a/Rnf19a/Park2/Ubr2/Rnf138/Nedd4l/Prpf19/Uhrf2/Btrc/Arih1/Rabgef1/Rnf41/Ube4b/Brap/Cul1/Herc6/Med21/Cul4b/Rnf128/Wwp2/Med17/Rnf125/Cacul1/Vhl/Cbl/Ube2f/Hectd1/Topors/Rnf139/Rnf144b/Mylip/Smurf1/Stub1/Rfwd2/Neurl3/Rnf152/Fbxo30/Fbxo40/Rnf149/Rnf7/Kcmf1/Fbxo6/Rnf181/Ube4a/Rnf217/Med18/Ube2u	60
MF	GO:0016779	nucleotidyltransferase activity	38/4201	117/20358	0.00177899	0.0230308	Pole/Trnt1/Polrmt/Pnpt1/Pold2/Twistnb/Papola/Tert/Hmbox1/Mtpap/Dntt/Pcyt2/Poll/Prim2/Uap1l1/Papss1/Polr1d/Pole4/Tamm41/Polr2c/Terf2/Polr2m/Nmnat3/Gmppa/Galt/Primpol/Polr2l/Polr3k/Polr2j/Mybbp1a/Papd4/Flad1/Ispd/Polr1c/Chrac1/Ptges3/Tut1/Polr2g	38
MF	GO:0019887	protein kinase regulator activity	54/4201	180/20358	0.00182427	0.0234061	Hk2/Kat2b/Ccne1/Cdkn1b/Grk5/Hspb1/Rplp1/Gprc5b/Hyal2/Chp1/H2afy/Erbb3/Dcn/Igf1/Rack1/Fam20a/Elp3/Adck5/Cdkn1a/Hsp90ab1/Ccny/Csnk2b/Fn3k/Agap2/Rptor/Spred1/Pkia/Alpk1/Cks1b/Ccne2/Cdkn2c/Podn/Gas6/Dus2/Nck1/Trib1/Ankrd54/Pomk/Cdkn1c/Alpk3/Gcn1l1/Grk3/Rtn4rl1/Lrtm1/Adck2/Flrt3/Lrrc15/Ercc6/Npm1/Cks2/Ccni/Fgfr1op/Strada/Ccnd1	54
MF	GO:0032182	ubiquitin-like protein binding	40/4201	125/20358	0.00187064	0.0237886	Rad23a/Tax1bp1/Hspb1/Ubqln4/Faf1/Tab2/Sqstm1/Cry1/Tnip1/Ubxn2a/Prpf8/Sharpin/Park2/Bag6/Ube2l6/Rbck1/Cks1b/Vcp/Eps15/Dyrk2/Brap/Herc2/Zfand6/Rps3/Fam175b/Zranb1/Hdac6/Dcun1d5/Agl/Cbx4/Ikbke/Kcnb1/Bre/Per2/Ide/Tnip2/Cks2/Parp10/Cry2/Ubxn1	40
MF	GO:0047617	acyl-CoA hydrolase activity	13/4201	28/20358	0.00194661	0.0243349	Acot8/Acot2/Acot3/Acot12/Lypla1/Them4/Lypla2/Park7/Acot11/Baat/Acot4/Haghl/Acot1	13
MF	GO:0022853	active ion transmembrane transporter activity	31/4201	91/20358	0.00195876	0.0243349	Atp5f1/Tcirg1/Atp5d/Atp4a/Atp7b/Atp6v0e/Slc12a7/Slc13a3/Atp5g3/Atp6v0a1/Slc13a5/Slc17a1/Slc17a4/Atp6v1c1/Cpox/Slc23a1/Atp5b/Atp5c1/Atp1b1/Slc20a1/Anxa5/Atp6v0d2/Slc13a4/Atp2b2/Atp2c1/Atp6v0b/Slc17a2/Slc20a2/Atp5l/Atp1a3/Slc4a4	31
MF	GO:0008395	steroid hydroxylase activity	25/4201	69/20358	0.00198743	0.0243349	Cyp2c29/Cyp17a1/Cyp2a5/Cyp2j9/Cyp39a1/Cyp21a1/Cyp2c55/Cyp2c39/Cyp2c44/Cyp2e1/Cyp2u1/Cyp7a1/Cyp3a25/Cyp2c37/Cyp2g1/Cyp8b1/Cyp2c50/Cyp3a11/Cyp2a12/Cyp2c70/Cyp3a59/Cyp2c54/Cyp2a4/Cyp2c68/Cyp2d12	25
MF	GO:0016853	isomerase activity	44/4201	141/20358	0.00200125	0.0243349	Fkbp11/Mri1/Ptgds/Pus10/Pdia6/Fkbp3/Tmx1/Eci2/Cwc27/Ppif/Ebpl/Txndc11/Pmm2/Ehhadh/Eci1/Ppic/Ptges2/Pdia3/Gale/Pus1/Erp27/Fkbp4/Ebp/Renbp/Rpusd4/Pin1/Lss/Galm/Qsox2/Gpi1/Txndc5/Dse/Ptpa/Ptges/Pusl1/Rpia/Ech1/Pgm3/Fkbp2/Hsd3b3/Acadm/Hsd3b2/Ptges3/Hmgcs1	44
MF	GO:0003746	translation elongation factor activity	4201-10-01	19/20358	0.00201827	0.0243349	Eef1e1/Eef1b2/Eefsec/Eef2/Eef1a1/Efl1/Tsfm/Gtpbp1/Eef1d/Eef1g	10
MF	GO:0016769	transferase activity, transferring nitrogenous groups	4201-12-01	25/20358	0.00203215	0.0243349	Etnppl/Phykpl/Got1/Agxt/Gatm/Gfpt1/Got2/Amt/Tgm2/Kyat1/Kyat3/Gapdh	12
MF	GO:0051537	2 iron, 2 sulfur cluster binding	4201-12-01	25/20358	0.00203215	0.0243349	Cmah/Glrx2/Xdh/Fech/Iscu/Cisd2/Ciapin1/Cisd1/Uqcrfs1/Isca1/Fxn/Aox1	12
MF	GO:0016628	oxidoreductase activity, acting on the CH-CH group of donors, NAD or NADP as acceptor	23/4201	62/20358	0.00207364	0.0246266	Blvra/Dhdh/Gfod2/Aifm2/Srd5a1/Fasn/Pecr/Marc1/Bdh2/Decr1/Ptgr1/Hsdl2/Heph/Dus2/Dpyd/Frrs1/Vat1/Decr2/Kdm1a/Gfod1/Dhcr7/Pyroxd2/Ptgr2	23
MF	GO:0044390	ubiquitin-like protein conjugating enzyme binding	16/4201	38/20358	0.00217532	0.0256224	Rnf114/Rnf185/Rnf144a/Rnf19a/Ppara/Park2/Rnf138/Arih1/Park7/Rps3/Rnf40/Dcun1d5/Rnf125/Rnf144b/March6/Rnf217	16
MF	GO:0042277	peptide binding	73/4201	259/20358	0.00219602	0.025656	Csnk1g2/Kpna6/Calr/Gstm7/Thop1/Apba3/Tnpo3/Hspa8/Lta4h/Fnta/H2-M2/Pex7/Avpr1a/Pex13/Srp68/Nup153/Ctsl/Nln/Ppif/Kpna3/Itm2b/Ednrb/Npr3/Lnpep/Tap2/Ercc3/Ppic/Pcsk5/Rps6kb2/Itgb1/Slc40a1/Rnpepl1/Itgav/Anxa5/Gstm4/Tlr2/Enpep/Cd1d1/Clta/Tm2d1/Apbb2/Brap/Itm2a/Bace1/Hcrtr2/Fntb/H2-Q4/Tap1/Gstp2/Gstm2/Inhba/Pik3r1/Rnpep/Cltb/Ldlrad3/Agtr1a/Sorl1/Ptges/H2-T24/Tmem158/Ide/Lepr/Memo1/Col25a1/H2-K1/Nupl1/H2…	73
MF	GO:0016790	thiolester hydrolase activity	18/4201	45/20358	0.0023573	0.0271642	Acot8/Acot2/Acot3/Acot12/Fasn/Lypla1/Pnkd/Them4/Lypla2/Park7/Nudt7/Acot11/Baat/Acot4/Acnat2/Haghl/Acnat1/Acot1	18
MF	GO:0004312	fatty acid synthase activity	4201-07-01	11/20358	0.00237525	0.0271642	Elovl1/Elovl2/Oxsm/Fasn/Elovl3/Elovl6/Mcat	7
MF	GO:0000287	magnesium ion binding	54/4201	182/20358	0.00238183	0.0271642	Comt/Stk38l/Idh3g/Csnk1g2/Rps6ka1/Mast2/Zak/Atp4a/Pten/Nlk/Ppm1a/Hacl1/Tkt/Ephx2/Stk3/Rps6ka2/Mtpap/Impa2/Atp9b/Rps6ka4/Prps2/Aasdhppt/Idh1/Farsb/Glul/Nek6/Abl1/Dut/Impa1/Atp9a/Gem/Dyrk2/Hmgcl/Dck/Nt5c3/Idh2/Atp11a/Nudt7/Mast3/Gclc/Ilvbl/Oxsr1/Mat1a/Endov/Dxo/Pklr/Pgm5/Dctpp1/Eno4/Pdp1/Dis3l2/Pgm3/Gnai1/Srpk2	54
MF	GO:0003678	DNA helicase activity	20/4201	52/20358	0.00241372	0.0273111	Mcm2/Mcm5/Nudt4/Supv3l1/Recql5/Ercc3/Peo1/Xrcc5/Mcm6/Gins1/Recql/Blm/Nudt7/Gins2/Mre11a/Recql4/Ino80/Dxo/Mcm3/Nudt6	20
MF	GO:0004812	aminoacyl-tRNA ligase activity	17/4201	42/20358	0.00265988	0.0298613	Vars/Cars/Wars/Aars2/Lars/Nars/Farsb/Eprs/Dars2/Tars2/Yars/Tarsl2/Aars/Lars2/Vars2/Mars/Sars2	17
MF	GO:0019902	phosphatase binding	54/4201	183/20358	0.00271246	0.0302025	Pparg/Dlg3/Akt1/Cdkn1b/Mast2/Ppp1cc/Met/Nol3/Akap1/Cry1/Hsp90b1/Cabin1/Rack1/Slc9a3r1/Stat5b/Hsp90aa1/Traf3/Hmgcr/Ppara/Bad/Shoc2/Stat1/Spred1/Ptpn1/Lmna/Vcp/Rpa2/Anapc4/Ankle2/Ctsc/Mvp/Igbp1/Eif2ak3/Jak3/Cdh5/Ppp1r9a/Ctnnd1/Cd300a/Ppp6r2/Sbf2/Cnst/Ptpa/Ppp1ca/Pik3r1/Itga1/Tctex1d4/Cacna1c/Ppp1r37/Mapk14/Chchd3/Trp53/Ppp1r3c/Cry2/Ell	54
MF	GO:0005506	iron ion binding	50/4201	167/20358	0.00274885	0.0302025	Haao/Cyp51/Cyp2c29/Cyp17a1/Calr/Pah/Cyp39a1/Xdh/Cyp4f14/Cyp21a1/Fech/Cyp2c55/Cyp2c39/Cyp2e1/Iscu/Lcn2/Cyp2u1/Cyp7a1/P3h1/Cyp4b1/Cyp4a14/Cyp3a25/Cyp3a13/Heph/Msmo1/Sc5d/Cyp1a2/Nt5e/Cdo1/Dpyd/Scd1/Cisd1/6430573F11Rik/Cyp2c37/Isca1/Agmo/Cyp8b1/Cyp2c50/Fto/Cyp3a11/Egln2/Fxn/Cyp2a12/Cyp2c70/Cyp26b1/Aox1/COX1/Cyp4a12a/Cyp4a10/Cyp2c54	50
MF	GO:0003743	translation initiation factor activity	19/4201	49/20358	0.00275333	0.0302025	Eif4g2/Eif5/Eif3h/Eif3e/Eif4a2/Eif5b/Eif3m/Eif3j1/Eif2a/Eif2b3/Eif4g3/Eif3i/Eif2b1/Eif3c/Eif3f/Eif1/Eif1a/Eif4b/Eif1ax	19
MF	GO:0004711	ribosomal protein S6 kinase activity	4201-08-01	14/20358	0.00294625	0.0313612	Grk5/Adck5/Rps6ka2/Rps6kb2/Alpk1/Alpk3/Grk3/Adck2	8
MF	GO:0016405	CoA-ligase activity	4201-08-01	14/20358	0.00294625	0.0313612	Acsf3/Sucla2/Slc27a2/Acss2/Slc27a1/Acsm1/Suclg1/Acsf2	8
MF	GO:0016863	intramolecular oxidoreductase activity, transposing C=C bonds	4201-08-01	14/20358	0.00294625	0.0313612	Eci2/Ebpl/Ehhadh/Eci1/Ebp/Ech1/Hsd3b3/Hsd3b2	8
MF	GO:0070402	NADPH binding	4201-08-01	14/20358	0.00294625	0.0313612	Qdpr/Fdxr/Srd5a1/Hmgcr/Dhfr/Fasn/Decr1/Grhpr	8
MF	GO:0017134	fibroblast growth factor binding	4201-12-01	26/20358	0.00307185	0.0324577	Fgfr4/Fgfrl1/Cxcl13/Itgav/Klb/Fgfr1/Gpc1/Thbs1/Rps19/S100a13/Rps2/Fgfr3	12
MF	GO:0043531	ADP binding	15/4201	36/20358	0.00334789	0.0351162	Chordc1/Myo9b/Hspa8/Cyb5r3/Myh10/Glud1/Myh9/Tap2/Prps2/Coq8a/Vcp/Gclc/Tap1/Mat1a/Pgk1	15
MF	GO:0004722	protein serine/threonine phosphatase activity	21/4201	57/20358	0.00349902	0.0361733	Ppp1cc/Ppp2r1a/Ppp2cb/Pten/Ppp1cb/Mtmr4/Ctdnep1/Ppm1m/Ppm1d/Ppm1a/Ppm1l/Ppp3ca/Ssu72/Ppp4c/Ppm1k/Pptc7/Ppp1ca/Ppp2r2d/Phlpp1/Pdp2/Pdp1	21
MF	GO:0033293	monocarboxylic acid binding	21/4201	57/20358	0.00349902	0.0361733	Pparg/Ptgds/Fabp7/Acaca/Pygl/Cyp4f14/Pcx/Lcn12/Fabp5/Cyp4a14/Acox3/Sh3glb1/Rara/Hlcs/Acacb/Fabp1/S100a8/Alox5ap/Cyp26b1/Ugt1a1/Ugt1a9	21
MF	GO:0016597	amino acid binding	22/4201	61/20358	0.00384065	0.0391684	Gnmt/Prodh/Cad/Pah/Ddc/Glud1/Dpys/Aars2/Ubr2/Brd4/Gldc/Shmt2/Agxt/Fmo3/Tdo2/Gfpt1/Got2/Aars/Pin1/Mat1a/Gchfr/Mat2a	22
MF	GO:0003725	double-stranded RNA binding	25/4201	72/20358	0.00384324	0.0391684	Prkra/Actn1/Dhx58/Supv3l1/Drosha/Mtdh/Dgcr8/Tuba1b/Hsp90ab1/Eif2ak2/Stau2/Mrpl44/Ifih1/Strbp/Fxr1/Dhx15/Dus2/Tubb4b/Ddx60/Ddx58/Ago1/Oasl1/Tlr7/Eif4b/Lsm14a	25
MF	GO:0016810	hydrolase activity, acting on carbon-nitrogen (but not peptide) bonds	40/4201	130/20358	0.00409867	0.0414773	Cad/Ada/Afmid/Hdac2/Vnn3/Aspa/Mthfd1/Ngly1/Btd/Dpys/Oplah/Pycrl/Ntan1/Acy1/Hdac3/Acy3/Padi4/Urah/Sirt3/Adal/Zbp1/Ampd2/Adar/Cda/Park7/Nadsyn1/Hdac6/Sin3b/Faah/Amdhd2/Vnn1/Gch1/Aspg/Sin3a/Sirt5/Gda/Hdac10/Klk1b4/Suds3/Macrod2	40
MF	GO:0044389	ubiquitin-like protein ligase binding	76/4201	278/20358	0.00428737	0.0430836	Slc22a18/Dlg3/Hltf/Btbd2/Calr/Fancl/Jkamp/Ube2g2/Faf1/Ndufs2/Ube2z/Hspa8/Sqstm1/Ube2a/Nlk/Cdk5rap3/Ube2b/Stx8/Traf3/Ripk1/Nkd2/Ywhaz/Rangap1/Gsk3b/Tuba1b/Cdkn1a/Park2/Lrpprc/Axin1/Bag6/Btbd1/Arih1/Xrcc5/Pax6/Map1lc3a/Fbxw7/Vcp/Rpa2/Per3/Dtx1/Cul1/Gabarapl1/Herc2/Rnf40/Cul4b/Hdac6/Map1lc3b/Gabarapl2/Usp2/Trip4/Trib1/Srprb/Abtb2/Cacul1/Ube2f/Asb16/Becn1/Gpi1/Egr2/Txnip/Cul7/Ube2l3/Wfs1/Stub1/Cul9/A…	76
MF	GO:0015631	tubulin binding	75/4201	274/20358	0.00437521	0.043661	Mx1/Ftcd/Emd/Spag5/Mast2/Rab11a/Ndrg1/Kif5b/Chp1/Kif1a/Fnta/Akap1/Appbp2/Rad51d/Fyn/Kif13a/Cct5/Park2/Spast/Lrpprc/Cript/Tubgcp2/Ppp1r42/Dst/Kif26b/Gnas/Map1lc3a/Pde4b/Macf1/Stmn1/Htt/Mtus2/Hsph1/Arl8b/Gas2/Kif22/Rps3/Fam175b/Stim1/Hdac6/Vbp1/Cetn2/Katnb1/Map1lc3b/Map4/Kif9/Mzt1/Dnm2/Ino80/Traf3ip1/Tbcc/Ranbp10/Atf5/Cdk5rap2/Eml2/Rcc2/Vps41/Kif21b/Tbca/Fmn1/Wdr81/Whamm/Spatc1/Gja1/S100a8/Bloc1s2/…	75
MF	GO:0015036	disulfide oxidoreductase activity	4201-12-01	27/20358	0.00450271	0.0442128	Txnrd3/Glrx2/Tmx1/Glrx/Gsto1/Ptges2/Txn1/Sh3bgrl3/Glrx3/Ifi30/Chchd4/Gfer	12
MF	GO:0030515	snoRNA binding	4201-12-01	27/20358	0.00450271	0.0442128	Nudt4/Nudt16l1/Imp4/Nop10/Nop56/Nudt7/Imp3/Utp6/Isg20/Tbl3/Rrp9/Nhp2l1	12
MF	GO:0016820	hydrolase activity, acting on acid anhydrides, catalyzing transmembrane movement of substances	35/4201	111/20358	0.00452281	0.0442128	Atp5f1/Tcirg1/Atp5d/Atp4a/Atp6v1b2/Atp7b/Abca1/Atp6v0e/Atp5g3/Abca5/Atp6v0a1/Abcc3/Atp6v1c1/Cpox/Tap2/Atp5b/Atp5c1/Atp1b1/Abca2/Anxa5/Atp6v0d2/Abcb8/Abcb9/Abcg2/Atp2b2/Abcd1/Atp2c1/Atp6v0b/Tap1/Atp5l/Atp1a3/Abca8a/Abcb4/Abca6/Abca14	35
MF	GO:0015399	primary active transmembrane transporter activity	36/4201	115/20358	0.00458834	0.0442513	Atp5f1/Tcirg1/Atp5d/Atp4a/Atp7b/Abca1/Atp6v0e/Atp5g3/Abca5/Atp6v0a1/Abcc3/Atp6v1c1/Cpox/Tap2/Atp5b/Atp5c1/Atp1b1/Abca2/Anxa5/Atp6v0d2/Abcb8/Abcb9/Abcg2/Atp2b2/Timm17b/Abcd1/Atp2c1/Atp6v0b/Tap1/Atp5l/Atp1a3/Abca8a/Abcb4/Abca6/Abca14/Tomm20	36
MF	GO:0015405	P-P-bond-hydrolysis-driven transmembrane transporter activity	36/4201	115/20358	0.00458834	0.0442513	Atp5f1/Tcirg1/Atp5d/Atp4a/Atp7b/Abca1/Atp6v0e/Atp5g3/Abca5/Atp6v0a1/Abcc3/Atp6v1c1/Cpox/Tap2/Atp5b/Atp5c1/Atp1b1/Abca2/Anxa5/Atp6v0d2/Abcb8/Abcb9/Abcg2/Atp2b2/Timm17b/Abcd1/Atp2c1/Atp6v0b/Tap1/Atp5l/Atp1a3/Abca8a/Abcb4/Abca6/Abca14/Tomm20	36
MF	GO:0004676	3-phosphoinositide-dependent protein kinase activity	4201-07-01	12/20358	0.00468763	0.0443166	Grk5/Adck5/Pdpk1/Alpk1/Alpk3/Grk3/Adck2	7
MF	GO:0019912	cyclin-dependent protein kinase activating kinase activity	4201-07-01	12/20358	0.00468763	0.0443166	Grk5/Adck5/Cdkn1a/Alpk1/Alpk3/Grk3/Adck2	7
MF	GO:1990381	ubiquitin-specific protease binding	4201-07-01	12/20358	0.00468763	0.0443166	Rad23a/Park2/Bag6/Vcp/Park7/March6/Chmp3	7
MF	GO:0043175	RNA polymerase core enzyme binding	4201-11-01	24/20358	0.00485759	0.0456232	Elof1/Recql5/2700060E02Rik/Elp3/Maf1/Brd4/Elp2/Wac/Cdc73/Ccar2/Ago1	11
MF	GO:0000993	RNA polymerase II core binding	4201-10-01	21/20358	0.00513863	0.0467975	Elof1/Recql5/2700060E02Rik/Elp3/Brd4/Elp2/Wac/Cdc73/Ccar2/Ago1	10
MF	GO:0017069	snRNA binding	14/4201	34/20358	0.0051483	0.0467975	Snrpb2/Cdk9/Trove2/Ddx39b/Prpf8/Ncbp2/Snrpb/Rnpc3/Snrpa1/Rbpms/Isg20/Lsm10/Snrpa/Nhp2l1	14
MF	GO:0003720	telomerase activity	4201-08-01	15/20358	0.00517801	0.0467975	Tert/Hmbox1/Prim2/Uap1l1/Terf2/Primpol/Ispd/Ptges3	8
MF	GO:0003964	RNA-directed DNA polymerase activity	4201-08-01	15/20358	0.00517801	0.0467975	Tert/Hmbox1/Prim2/Uap1l1/Terf2/Primpol/Ispd/Ptges3	8
MF	GO:0004704	NF-kappaB-inducing kinase activity	4201-08-01	15/20358	0.00517801	0.0467975	Grk5/Adck5/Alpk1/Ppp4c/Alpk3/Grk3/Ikbke/Adck2	8
MF	GO:0090079	translation regulator activity, nucleic acid binding	4201-08-01	15/20358	0.00517801	0.0467975	Cpeb4/Paip1/Cpeb1/Paip2/Rara/Cpeb3/Pura/Paip2b	8
MF	GO:0071949	FAD binding	4201-09-01	18/20358	0.00527922	0.047414	Prodh/Cyb5r3/Cyb5r4/Dpyd/Aifm1/Mical2/Kmo/Ddo/Cry2	9
MF	GO:0043492	ATPase activity, coupled to movement of substances	38/4201	124/20358	0.00543917	0.0485471	Atp5f1/Tcirg1/Atp5d/Atp4a/Atp7b/Abca1/Atp6v0e/Atp5g3/Abca5/Atp6v0a1/Abcc3/Atp6v1c1/Cpox/Tap2/Atp9b/Atp5b/Atp5c1/Atp1b1/Abca2/Atp9a/Anxa5/Atp6v0d2/Abcb8/Abcb9/Abcg2/Atp2b2/Abcd1/Atp11a/Atp2c1/Atp6v0b/Tap1/Atp5l/Atp1a3/Abca8a/Abcb4/Abca6/Atp8b4/Abca14	38
